# Supplementary material
Source: publisher figshare collection journal article supplement (https://tandf.figshare.com/ndownloader/files/17282024)
Supplement: Supplementary file 1 [file 17282024]

## Sheet: pcb105
	Name	beta	adj.P.Val	chr	UCSC_RefGene_Name	UCSC_RefGene_Accession
1	cg00081799	-0.64066	0.0496394	chr1	ACOT7;ACOT7;ACOT7;ACOT7	NM_181864;NM_181865;NM_007274;NM_181866
2	cg00087511	-0.203708	0.025571	chr1	SLC2A7	NM_207420
3	cg00205058	-0.224626	0.023637	chr6	FRMD1	NM_024919
4	cg00267862	-0.349708	0.0257273	chr7	TNRC18	NM_001080495
5	cg00351735	-0.403735	0.0390863	chr12	ANKS1B;ANKS1B;ANKS1B	NM_020140;NM_152788;NM_181670
6	cg00539049	-0.211155	0.0317962	chr2	LYPD6B	NM_177964
7	cg00600362	-0.174374	0.0269845	chr5
8	cg00929606	1.26822	0.0388208	chr7	ZNF3;ZNF3	NM_017715;NM_032924
9	cg00968270	-0.384982	0.0340848	chr16	ZCCHC14	NM_015144
10	cg01004918	-0.245939	0.0211101	chr1
11	cg01088561	1.32763	0.0345029	chr4	ATP10D	NM_020453
12	cg01456640	-0.331017	0.013105	chr4
13	cg01498468	-0.329849	0.0213231	chr16
14	cg01649317	-0.258481	0.0283585	chr16	JPH3	NM_020655
15	cg01900254	-0.845961	0.0380881	chr16
16	cg01934856	-0.874895	0.0349169	chr1	CASZ1;CASZ1	NM_017766;NM_001079843
18	cg01962989	-0.320653	0.0337184	chr8	C8orf83	NR_015339
19	cg02116225	-0.206077	0.031045	chr17	SHMT1;SHMT1	NM_004169;NM_148918
20	cg02266840	-0.265656	0.0334676	chr14
21	cg02280200	-0.115998	0.0294163	chr12	IQSEC3	NM_001170738
22	cg02350636	-0.103942	0.0157262	chr5	SLC12A7	NM_006598
23	cg02461363	0.739992	0.0257273	chr10	TMEM26	NM_178505
24	cg02491701	0.33724	0.0213231	chr2
25	cg02503646	0.401011	0.0174107	chr3	PHF7;PHF7;BAP1	NM_173341;NM_016483;NM_004656
26	cg02903436	0.24508	0.0294163	chr6	PGK2;PGK2	NM_138733;NM_138733
27	cg03226666	0.767421	0.0373554	chr6	NKAIN2	NM_001040214
28	cg03277550	-0.271426	0.0219102	chr16	AFG3L1;CENPBD1;AFG3L1;AFG3L1	NR_003228;NM_145039;NR_003227;NR_003226
29	cg03301025	-0.253977	0.0468735	chr17	C17orf76;C17orf76	NM_207387;NM_001113567
30	cg03313447	-0.691606	0.025571	chr19	CCDC97	NM_052848
31	cg03433362	-0.25248	0.0455696	chr12	RIMBP2	NM_015347
32	cg03474070	-0.855295	0.0333562	chr16	CDH13	NM_001257
33	cg03476357	0.620928	0.0378401	chr21	N6AMT1;N6AMT1	NM_182749;NM_013240
34	cg03582419	-0.166348	0.0388208	chr4
35	cg03628000	-0.380438	0.0423349	chr16	PARN;PARN	NM_001134477;NM_002582
36	cg03657837	-0.106279	0.025571	chr10	LHPP;LHPP	NM_022126;NM_001167880
37	cg03752689	0.195628	0.0492428	chr1	C1orf74	NM_152485
38	cg04016730	-0.213654	0.0426373	chr6	NFKBIL1;NFKBIL1;ATP6V1G2;NFKBIL1;NFKBIL1;ATP6V1G2	NM_001144961;NM_005007;NM_130463;NM_001144962;NM_001144963;NM_138282
39	cg04180473	-0.237009	0.025571	chr17	SRP68	NM_014230
40	cg04436724	-0.142887	0.036036	chr2	PXDN	NM_012293
41	cg04522374	-0.406546	0.0429176	chr12
42	cg04702989	-0.16118	0.0182436	chr16
43	cg04898518	-0.280253	0.0416766	chr1	UQCRHL;UQCRHL	NM_001089591;NM_001089591
17	cg01953069	-0.0710831	0.0333562	chr9	TRAF2	NM_021138
101	cg12476735	-0.0745471	0.0178643	chr15	ADAMTS17	NM_139057
167	cg19542753	-0.0805976	0.0351061	chr5
208	cg26830192	-0.0930717	0.0174107	chr8	CLN8	NM_018941
117	cg14318001	-0.0949921	0.0317962	chr14	SFRS5;SFRS5	NM_001039465;NM_006925
140	cg16902156	-0.0964923	0.0416766	chr1	DNASE2B;UOX	NM_021233;NR_003927
136	cg16348068	-0.0977897	0.0468735	chr4
44	cg05100017	-0.658439	0.0347374	chr6	GRM4	NM_000841
45	cg05103956	-0.298247	0.0399103	chr16
46	cg05109049	0.664045	0.0468735	chr17	NF1;EVI2B;NF1	NM_001042492;NM_006495;NM_000267
47	cg05584919	-0.398984	0.0219279	chr16	CDK10;CDK10;CDK10;CDK10;CDK10;CDK10	NR_027702;NR_027703;NM_001160367;NM_052988;NM_052987;NM_001098533
48	cg05606948	-0.187502	0.0416766	chr13	MIPEP	NM_005932
49	cg05881566	-0.234688	0.0482286	chr11	C11orf9;C11orf9;DKFZP434K028	NM_013279;NM_001127392;NR_026882
50	cg06021522	-0.246531	0.0326983	chr11	SERGEF	NM_012139
51	cg06034238	-1.20858	0.0164724	chr1	IKBKE	NM_014002
52	cg06193958	0.361375	0.0258959	chr12	HOXC10	NM_017409
53	cg06340704	-0.434808	0.0189051	chr13	MBNL2;MBNL2	NM_144778;NM_207304
54	cg06502071	-0.123066	0.0480512	chr16	MSLNL;MIR662	NM_001025190;NR_030384
55	cg06725540	-0.180448	0.0417695	chr12
56	cg06752267	-0.213824	0.0423349	chr5	COL23A1	NM_173465
57	cg07000806	-0.179301	0.0340901	chr7
58	cg07025785	1.6859	0.0203088	chr14
59	cg07106169	0.540518	0.0213231	chr2
60	cg07123022	-0.140529	0.0468735	chr14	TTLL5	NM_015072
61	cg07249409	0.339593	0.0441197	chr1	C1orf123	NM_017887
62	cg07328888	0.945058	0.0380881	chr13	N4BP2L1;N4BP2L1	NM_052818;NM_001079691
63	cg07418777	-0.205039	0.019807	chr10	CCDC3	NM_031455
64	cg07810282	-0.230272	0.013105	chr10	TCERG1L	NM_174937
65	cg07841353	-0.242721	0.0112703	chr5	COL23A1	NM_173465
66	cg08064269	-0.677458	0.0498445	chr12	H3F3C	NM_001013699
67	cg08105813	-1.26935	0.017544	chr2
68	cg08347226	-0.700825	0.0219279	chr2	GPC1	NM_002081
69	cg08363013	-0.30751	0.0207202	chr17	LSM12	NM_152344
70	cg08537804	-0.33711	0.0294163	chr11	DSCAML1	NM_020693
71	cg08670922	-0.129562	0.0345252	chr3	EPHA3;EPHA3	NM_182644;NM_005233
72	cg08723459	-0.180378	0.0285554	chr16	CHMP1A;CHMP1A	NM_001083314;NM_002768
73	cg08750439	-0.11449	0.0286875	chr11
74	cg08777490	1.67156	0.0146809	chr8	DUSP4;DUSP4	NM_001394;NM_057158
75	cg08945756	-0.48384	0.0485212	chr6
76	cg08978835	-1.25187	0.0203365	chr10	ADARB2	NM_018702
77	cg09428868	-0.209796	0.0333562	chr4	AFAP1;AFAP1;LOC84740	NM_198595;NM_001134647;NR_026892
78	cg09702096	-0.125612	0.0380881	chr6	NOTCH4	NM_004557
79	cg09798688	-0.310177	0.0467194	chr1
80	cg09856590	-0.244357	0.0174107	chr16	SETD6;SETD6	NM_001160305;NM_024860
81	cg09858160	-0.385429	0.0416766	chr5	MAT2B;MAT2B	NM_013283;NM_182796
82	cg09917506	0.281877	0.0493394	chr1	GNPAT;C1orf131	NM_014236;NM_152379
83	cg10334416	-0.462524	0.0416766	chr17
84	cg10362172	0.326178	0.036036	chr3
85	cg10457985	-0.341183	0.0376758	chr4
86	cg10572659	-0.346784	0.0350365	chr11
87	cg10660253	-0.447953	0.0340848	chr12	NANOG	NM_024865
88	cg10681804	-0.277648	0.0181283	chr20	GGT7	NM_178026
89	cg10953378	-0.100013	0.0480512	chr1
90	cg11219614	-0.860481	0.0203088	chr8	C8orf22	NM_001007176
91	cg11271129	-0.166415	0.00729899	chr2	KLHL29	NM_052920
92	cg11484403	-0.164523	0.0333562	chr4	PCGF3	NM_006315
93	cg11524974	-0.150771	0.0163398	chr15	RORA	NM_134261
94	cg11680194	-0.101311	0.0326983	chr5
95	cg11721249	0.798005	0.0494091	chr12	KRT86	NM_002284
96	cg11851257	-0.63929	0.0112703	chr17	MYST2	NM_007067
97	cg12037129	-0.157226	0.025571	chr1	CNIH3	NM_152495
98	cg12260798	0.97133	0.0388208	chr6	HIST1H4F	NM_003540
99	cg12300123	-0.563726	0.0050457	chr6	COL11A2;COL11A2;COL11A2	NM_080679;NM_080681;NM_080680
100	cg12400114	-0.14041	0.0429176	chr1
102	cg12799824	1.1762	0.0492428	chr1
103	cg12882815	-0.280621	0.0174107	chr10
104	cg12887001	-0.446659	0.0426373	chr9
105	cg13293643	-0.222258	0.0174107	chr8
106	cg13465723	-0.185392	0.0174107	chr6	BAT2	NM_080686
107	cg13523449	-0.133342	0.0426373	chr11	SART1	NM_005146
108	cg13674042	-0.844082	0.00315021	chr5	STARD4	NM_139164
109	cg13791224	-0.376656	0.0388208	chr10	PFKP	NM_002627
110	cg13843483	-0.106911	0.0306134	chr2
111	cg13882899	-0.228385	0.0217031	chr9
112	cg13883981	-0.140717	0.023637	chr3
113	cg13940923	0.266912	0.025571	chr7	TRRAP	NM_003496
114	cg14161885	-0.462307	0.0203088	chr1	NBPF15;NBPF15;NBPF15	NM_001170755;NM_173638;NM_173638
115	cg14211735	-0.167204	0.0467194	chr15	PSMA4;PSMA4;PSMA4	NM_001102667;NM_001102668;NM_002789
116	cg14225719	-0.314193	0.0286875	chr9	TMC1	NM_138691
118	cg14554716	-0.271634	0.0157262	chr5	AP3S1	NM_001284
119	cg14608581	-0.738672	0.0340848	chr2	SNRNP27	NM_006857
120	cg14633298	-0.57447	0.0340019	chr6	TRIM27	NM_006510
121	cg14644025	0.685378	0.0418699	chr17	DDX5;CCDC45	NM_004396;NM_138363
122	cg14657876	-0.182383	0.0258959	chr11	NAV2;NAV2;NAV2	NM_182964;NM_001111018;NM_145117
123	cg14867639	-0.558728	0.0429176	chr12
124	cg14969015	-0.215526	0.0146809	chr1	ERI3	NM_024066
125	cg15029402	-0.219703	0.0257273	chr3
126	cg15219320	0.268648	0.0326983	chr5
127	cg15275312	-1.19253	0.0112703	chr3	TUSC2	NM_007275
128	cg15479068	0.362332	0.0174107	chr22	SYN3	NM_001135774
129	cg15696821	-0.12134	0.0174107	chr2	NCRNA00164	NR_027020
130	cg15833704	-0.356384	0.0157262	chr10	ZCCHC24	NM_153367
131	cg15837830	-0.121953	0.0468735	chr8
132	cg15886966	-0.612975	0.0388208	chr11	LDLRAD3	NM_174902
133	cg16105687	1.03562	0.0258959	chr19
134	cg16123202	-0.519494	0.027974	chr7
135	cg16191087	-0.796181	0.0166264	chr9	RGS3;RGS3	NM_017790;NM_144488
137	cg16434098	-0.277952	0.0399103	chr5	ODZ2	NM_001122679
138	cg16523078	-0.928256	0.0258112	chr1	C1orf52;C1orf52	NR_024113;NM_198077
139	cg16575125	-0.781745	0.0146809	chr5	PLEKHG4B	NM_052909
141	cg16928869	-0.262845	0.0467194	chr20	CDH4	NM_001794
142	cg16987684	-0.743103	0.036036	chr4	RRH	NM_006583
143	cg17017284	-1.45316	0.0257273	chr1	USP21;USP21	NM_012475;NM_001014443
144	cg17076431	-0.402216	0.0164724	chr6
145	cg17383793	0.359399	0.0340848	chr5	MOCS2;MOCS2	NM_176806;NM_004531
146	cg17578330	-0.102327	0.0258959	chr17
147	cg17607942	-0.157054	0.0480512	chr3
148	cg17676119	-0.738714	0.0380881	chr6
149	cg17795252	-0.541291	0.0283585	chr3	SOX2OT	NR_004053
150	cg17812839	-0.571184	0.0388208	chr1	NMNAT2	NM_015039
151	cg18120790	-0.116992	0.0467194	chr15	TRPM1	NM_002420
152	cg18302460	-0.161463	0.0189751	chr4
153	cg18627852	0.51191	0.0257273	chr12	SNRPF	NM_003095
154	cg18700940	1.18705	0.0426373	chr17	MAP3K14	NM_003954
155	cg18708412	-0.196945	0.0333562	chr22	DGCR14;TSSK2	NM_022719;NM_053006
156	cg18837292	-0.607953	0.013105	chr5
157	cg18864442	-0.444211	0.0333562	chr14	RTN1;RTN1	NM_021136;NM_206857
158	cg18954700	0.289217	0.00729899	chr10	HTRA1	NM_002775
159	cg19096358	-0.20997	0.0211101	chr5	ADAMTS2	NM_014244
160	cg19102771	0.577861	0.0498445	chr2	CCDC140	NM_153038
161	cg19115344	-0.515914	0.031044	chr2
162	cg19180710	-0.247361	0.0371907	chr2
163	cg19186056	-0.871343	0.0103406	chr11
164	cg19202601	-0.133905	0.0467194	chr22	NF2;NF2;NF2;NF2;NF2;NF2;NF2;NF2;NF2	NM_181832;NM_016418;NM_181829;NM_000268;NM_181833;NM_181828;NM_181830;NM_181831;NM_181825
165	cg19245943	0.769542	0.0294163	chr19	NUCB1	NM_006184
166	cg19464247	-0.369557	0.0207202	chr5	ADAM19	NM_033274
168	cg19927920	0.548019	0.0467194	chr2	TTC15	NM_016030
169	cg20111235	0.260333	0.00354368	chr22	CCDC117;CCDC117	NM_173510;NM_173510
170	cg20134355	-0.170002	0.0416766	chr18	LOXHD1;LOXHD1	NM_001145472;NM_144612
171	cg20619296	-0.111859	0.0269845	chr1
172	cg20676542	0.208306	0.0057584	chr17	TRIM25	NM_005082
173	cg20821980	-0.517841	0.0416766	chr20	ProSAPiP1	NM_014731
174	cg20948377	-0.711233	0.0305075	chr2	LOC90784	NR_026984
175	cg21475781	-0.136396	0.0265629	chr1	CFHR5	NM_030787
176	cg21847751	0.197294	0.0340019	chr2	C2orf52	NR_024079
177	cg22203081	0.249813	0.0467194	chr11	SAPS3;SAPS3;SAPS3;SAPS3;SAPS3;SAPS3	NM_001164163;NM_001164162;NM_001164164;NM_001164160;NM_001164161;NM_018312
178	cg22233082	-0.136771	0.0492428	chr15	MIR627;VPS39	NR_030357;NM_015289
179	cg22417032	-0.208953	0.0377943	chr7	PTPRN2;PTPRN2;PTPRN2	NM_002847;NM_130842;NM_130843
180	cg22509057	-0.213865	0.0157262	chr1	TDRD10;TDRD10	NM_182499;NM_001098475
181	cg22605037	-0.667777	0.0166264	chr13
182	cg22662829	-0.394236	0.0157262	chr8
183	cg22740809	-0.282266	0.00729899	chr10	TUBGCP2	NM_006659
184	cg22755579	-0.108596	0.034442	chr6
185	cg22843111	-0.22104	0.0363266	chr5	CMYA5	NM_153610
186	cg23047681	0.440015	0.0219279	chr6	HACE1	NM_020771
187	cg23227932	-0.200734	0.0258959	chr6	KLC4;KLC4;KLC4	NM_201522;NM_201521;NM_201523
188	cg23508184	0.412045	0.0146809	chr12
189	cg23760103	-0.121589	0.0371907	chr6	DDAH2	NM_013974
190	cg23786806	-0.123344	0.0468735	chr2
191	cg23936463	-0.274214	0.0388208	chr22	FAM19A5	NM_001082967
192	cg24302344	-0.819818	0.0498445	chr2	UBE2F	NM_080678
193	cg24337235	-0.174402	0.0333562	chr3	EPHA6	NM_001080448
194	cg24382686	1.04316	0.0494091	chr17
195	cg24480524	-0.568186	0.0498445	chr17	B3GNTL1	NM_001009905
196	cg24779222	-0.898611	0.0207202	chr10
197	cg24831140	-0.157859	0.0416766	chr15
198	cg24944231	-0.918652	0.0189051	chr5	DNAJC21;DNAJC21	NM_001012339;NM_194283
199	cg25024459	-0.278577	0.0289438	chr17	RPTOR;RPTOR	NM_001163034;NM_020761
200	cg25382751	-0.987447	0.0333562	chr19	TSPAN16;TSPAN16	NM_012466;NM_012466
201	cg25410321	-0.883832	0.013105	chr2	ASXL2	NM_018263
202	cg25522867	-0.150243	0.0219102	chr11	ABTB2	NM_145804
203	cg25683570	-0.516249	0.00729899	chr1
204	cg25718361	-0.398243	0.0388208	chr22	TBC1D22A	NM_014346
205	cg25946540	-0.697714	0.0178643	chr20	DEFB123;DEFB123	NM_153324;NM_153324
206	cg26264032	-0.117046	0.0468735	chr17
207	cg26552477	-0.293675	0.0306134	chr7
209	cg27331233	-0.126217	0.0492428	chr1	LRRC7;PIN1L	NM_020794;NR_023916
210	cg27343208	-0.662215	0.0112703	chr4	ZFYVE28	NM_020972
211	cg27399031	-0.499439	0.0146809	chr4
212	cg27462988	-0.121476	0.0257273	chr10	DCLRE1A	NM_014881
213	ch.12.59779038F	0.742573	0.0166264	chr12
214	ch.6.14670643R	0.230941	0.0257273	chr6

## Sheet: pcb105_f
	Name	beta	adj.P.Val	chr	UCSC_RefGene_Name	UCSC_RefGene_Accession
1	cg00081799	-0.628073	0.0439266	chr1	ACOT7;ACOT7;ACOT7;ACOT7	NM_181864;NM_181865;NM_007274;NM_181866
2	cg00087511	-0.229126	0.0443488	chr1	SLC2A7	NM_207420
3	cg00267862	-0.366636	0.0477437	chr7	TNRC18	NM_001080495
4	cg00351735	-0.426224	0.0341441	chr12	ANKS1B;ANKS1B;ANKS1B	NM_020140;NM_152788;NM_181670
5	cg00539049	-0.22175	0.027201	chr2	LYPD6B	NM_177964
6	cg00968270	-0.397562	0.0172081	chr16	ZCCHC14	NM_015144
7	cg01166350	-0.56772	0.0443488	chr14
8	cg01522412	-0.187077	0.0477437	chr17	MRC2	NM_006039
9	cg02266840	-0.249979	0.0314642	chr14
10	cg02868201	-0.275504	0.0310582	chrX
11	cg03003335	-0.659384	0.0477437	chr1	ACAP3	NM_030649
12	cg03313447	-0.683695	0.0337138	chr19	CCDC97	NM_052848
13	cg04174838	0.329221	0.0347911	chrX
14	cg05776138	0.217128	0.0367683	chr12	MIR1228;LRP1	NR_031597;NM_002332
15	cg06034238	-1.18741	0.0310582	chr1	IKBKE	NM_014002
16	cg07955933	-0.358094	0.0467136	chr6
17	cg08064269	-0.708945	0.0341441	chr12	H3F3C	NM_001013699
18	cg08105813	-1.29098	0.027201	chr2
19	cg08272783	-0.80989	0.0467136	chr11	DKFZp779M0652	NR_027134
20	cg08363013	-0.335644	0.0297157	chr17	LSM12	NM_152344
21	cg08777490	1.76917	0.027201	chr8	DUSP4;DUSP4	NM_001394;NM_057158
22	cg09434667	-0.155508	0.0477437	chr15
23	cg09856590	-0.272213	0.0310582	chr16	SETD6;SETD6	NM_001160305;NM_024860
24	cg11271129	-0.18404	0.0310582	chr2	KLHL29	NM_052920
25	cg11851257	-0.677232	0.0467136	chr17	MYST2	NM_007067
26	cg11953417	-0.227701	0.0323958	chr7	GAL3ST4	NM_024637
27	cg12119715	0.352431	0.0417798	chr22	C22orf41	NM_001123225
28	cg12300123	-0.59621	0.0348136	chr6	COL11A2;COL11A2;COL11A2	NM_080679;NM_080681;NM_080680
29	cg12497298	0.469184	0.0172081	chr1	MUL1	NM_024544
30	cg12623456	-0.498518	0.0348136	chr7
31	cg13093110	-0.583765	0.0310582	chr1
32	cg13293643	-0.245696	0.0477437	chr8
33	cg13674042	-0.824811	0.0337138	chr5	STARD4	NM_139164
34	cg13685964	-0.14126	0.0467136	chr3	SLC6A1	NM_003042
35	cg14161885	-0.451618	0.0467136	chr1	NBPF15;NBPF15;NBPF15	NM_001170755;NM_173638;NM_173638
36	cg14554716	-0.282305	0.0310582	chr5	AP3S1	NM_001284
37	cg14633298	-0.602331	0.0417798	chr6	TRIM27	NM_006510
38	cg14977433	-0.350919	0.0477437	chr4
39	cg15017604	-0.317165	0.027201	chr11
40	cg15219320	0.277828	0.0477437	chr5
41	cg15275312	-1.19515	0.0341441	chr3	TUSC2	NM_007275
42	cg15479068	0.383138	0.0417798	chr22	SYN3	NM_001135774
43	cg15555590	-0.366711	0.0467136	chr11	KDM4DL	NM_001161630
44	cg15637765	1.74155	0.0310582	chr5	TRIO	NM_007118
45	cg15886966	-0.697643	0.0297157	chr11	LDLRAD3	NM_174902
46	cg16191087	-0.762204	0.0297157	chr9	RGS3;RGS3	NM_017790;NM_144488
47	cg16523078	-1.01008	0.0417798	chr1	C1orf52;C1orf52	NR_024113;NM_198077
48	cg16575125	-0.759185	0.027201	chr5	PLEKHG4B	NM_052909
49	cg16902385	0.474172	0.0310582	chr18	ST8SIA3	NM_015879
50	cg17970176	-0.255674	0.0323958	chr19	ZNF575	NM_174945
51	cg18257955	-0.338214	0.0477437	chr15	SNORD115-15;SNORD115-21;SNORD115-22	NR_003307;NR_003313;NR_003314
52	cg18657303	-0.738024	0.0443885	chr4
53	cg18724069	-0.399684	0.0467136	chr5
54	cg18837292	-0.617703	0.0341441	chr5
55	cg19102771	0.606163	0.0323958	chr2	CCDC140	NM_153038
56	cg19115344	-0.557466	0.0477437	chr2
57	cg19186056	-0.809675	0.027201	chr11
58	cg19202601	-0.134021	0.0467136	chr22	NF2;NF2;NF2;NF2;NF2;NF2;NF2;NF2;NF2	NM_181832;NM_016418;NM_181829;NM_000268;NM_181833;NM_181828;NM_181830;NM_181831;NM_181825
59	cg20111235	0.254028	0.027201	chr22	CCDC117;CCDC117	NM_173510;NM_173510
60	cg20821980	-0.510383	0.0443885	chr20	ProSAPiP1	NM_014731
61	cg20948377	-0.772062	0.0323958	chr2	LOC90784	NR_026984
62	cg22581219	0.737263	0.0443885	chr3	CAND2;CAND2	NM_001162499;NM_012298
63	cg22662829	-0.426535	0.0467136	chr8
64	cg23227932	-0.199174	0.0329125	chr6	KLC4;KLC4;KLC4	NM_201522;NM_201521;NM_201523
65	cg24242593	-0.296185	0.0477437	chr15	C15orf39	NM_015492
66	cg24581657	-0.447769	0.0417798	chr20	ANGPT4	NM_015985
67	cg24664038	-0.476185	0.0477437	chr6
68	cg24779222	-0.920882	0.0477437	chr10
69	cg25410321	-0.828285	0.0391929	chr2	ASXL2	NM_018263
70	cg26552477	-0.303653	0.0310582	chr7
71	cg26566411	-0.264141	0.0477437	chr15	RYR3	NM_001036
72	cg27399031	-0.48716	0.0417798	chr4
73	cg27462988	-0.139423	0.0310582	chr10	DCLRE1A	NM_014881

## Sheet: ppdde_m
	Name	beta	adj.P.Val	chr	UCSC_RefGene_Name	UCSC_RefGene_Accession
1	cg00005617	-0.0985165	0.0472055	chrX	EFNB1	NM_004429
2	cg00008932	-0.0790315	0.0473504	chrX	RPS4X	NM_001007
3	cg00016934	0.192551	0.0224895	chrX	BCOR;BCOR	NM_001123384;NM_001123383
4	cg00019463	0.062924	0.0438246	chr15	RNF111	NM_017610
5	cg00039044	-0.0569268	0.0425367	chr4	ENOPH1;ENOPH1;HNRPDL;HNRPDL	NM_021204;NM_021204;NR_003249;NM_031372
6	cg00064778	0.188932	0.035974	chr5
7	cg00098732	-0.138176	0.0469519	chrX	HS6ST2;HS6ST2	NM_001077188;NM_147175
8	cg00109764	-0.0624642	0.0442877	chr3
9	cg00127732	-0.0367081	0.0357288	chr19	ERF	NM_006494
10	cg00129774	0.147828	0.0474094	chr12	CDK2;SILV;CDK2	NM_001798;NM_006928;NM_052827
11	cg00141845	-0.140371	0.0488164	chrX	UPRT;UPRT	NM_145052;NR_030774
12	cg00153448	-0.033057	0.0407056	chr20
13	cg00155844	-0.0316984	0.0474094	chr15	HERC2	NM_004667
14	cg00175859	-0.0931021	0.0404938	chr6	PERP;PERP	NM_022121;NM_022121
15	cg00221709	0.111454	0.0497496	chr15
16	cg00248713	-0.0583221	0.0374222	chr20	CHRNA4	NM_000744
17	cg00248856	-0.0414959	0.0466862	chr11	CCND1	NM_053056
18	cg00255219	0.292875	0.0428472	chrX
19	cg00266918	0.175461	0.045203	chrX	SCML1;SCML1;SCML1;SCML1	NM_001037540;NM_001037535;NM_006746;NM_001037536
20	cg00271925	0.105955	0.0357281	chr6	LY6G5C	NM_025262
21	cg00299820	-0.0772584	0.049109	chr1
22	cg00311984	0.189645	0.0322673	chr8	PLEC1;PARP10	NM_000445;NM_032789
23	cg00336149	-0.221214	0.0395046	chr3	CACNA1D;CACNA1D;CACNA1D	NM_001128839;NM_000720;NM_001128840
24	cg00392156	-0.0504553	0.0336423	chr4	PDE6B;PDE6B;PDE6B	NM_001145292;NM_000283;NM_001145291
25	cg00402516	-0.066536	0.04973	chr19	MBD3	NM_003926
26	cg00422578	-0.145581	0.0491005	chr11
27	cg00428012	0.144795	0.047604	chrX	ATP7A;ATP7A	NM_000052;NM_000052
28	cg00445824	-0.0626163	0.0377968	chr19	ISYNA1;ISYNA1;ISYNA1;ISYNA1;ISYNA1	NM_016368;NM_001170938;NM_001170938;NM_001170939;NM_016368
29	cg00490655	0.0959036	0.0260798	chr2	FIGN	NM_018086
30	cg00514746	-0.0429913	0.0424315	chrX
31	cg00533407	-0.086739	0.0407056	chr7	ACCN3;ACCN3;ACCN3	NM_020322;NM_020321;NM_004769
32	cg00558749	0.102477	0.0457723	chr1
33	cg00577569	-0.0658476	0.0498273	chr7	KCTD7;KCTD7	NM_001167961;NM_153033
34	cg00590670	-0.0336393	0.04973	chr2	IGFBP5	NM_000599
35	cg00619470	0.199653	0.0407056	chr6
36	cg00625653	-0.0659281	0.0456915	chr3	WNT7A	NM_004625
37	cg00637144	-0.0678357	0.045203	chr13	DHRS12;DHRS12	NM_001031719;NM_024705
38	cg00639200	0.0572415	0.0466862	chr17
39	cg00692892	-0.0248836	0.0457723	chrX
40	cg00712627	-0.0304459	0.0488164	chr10
41	cg00724839	0.092746	0.045203	chr22	NPTXR	NM_014293
42	cg00725777	-0.0444224	0.047604	chrX	NGFRAP1;NGFRAP1	NM_206917;NM_206915
43	cg00725912	0.170607	0.045203	chrX	PRPS2;PRPS2	NM_002765;NM_001039091
44	cg00735885	-0.0656981	0.0322673	chrX	LHFPL1	NM_178175
45	cg00765686	0.123444	0.0404938	chrX	NHS	NM_198270
46	cg00824273	-0.0554921	0.0425367	chrX	VENTXP1	NR_001559
47	cg00829600	-0.051058	0.0498273	chr16
48	cg00875476	-0.0268294	0.0469519	chr10	INPP5A	NM_005539
49	cg00877056	0.183191	0.0469519	chrX	MID2;MID2	NM_052817;NM_012216
50	cg00881557	0.124937	0.0407056	chrX
51	cg00883493	-0.0445996	0.027084	chr8	LOC100133669	NR_026913
52	cg00884334	0.0428644	0.0457723	chr15
53	cg00889295	-0.117347	0.0478603	chr6	ZBTB12	NM_181842
54	cg00944649	-0.0279851	0.0474094	chr1	C1orf64	NM_178840
55	cg00949980	-0.0407229	0.0404938	chr21	SUMO3	NM_006936
56	cg00984602	0.104881	0.0466862	chr6	SRF	NM_003131
57	cg01009686	0.174834	0.0478603	chrX	ATP7A	NM_000052
58	cg01010781	-0.0593894	0.0357288	chr7	TMED4	NM_182547
59	cg01044129	-0.11041	0.0322673	chr13	SMAD9;SMAD9	NM_001127217;NM_005905
60	cg01046511	0.0851251	0.0488904	chr17	KDM6B	NM_001080424
61	cg01046746	0.27872	0.0495597	chrX
62	cg01047586	0.0892434	0.0336423	chr2
63	cg01090161	0.138403	0.0474094	chr6	GRM4	NM_000841
64	cg01092293	0.0467865	0.0472055	chr2	LY75	NM_002349
65	cg01101865	0.0921456	0.0274364	chr14	FLJ43390	NR_015358
66	cg01125531	-0.0678626	0.035974	chr20	EEF1A2	NM_001958
67	cg01154445	0.106881	0.0472932	chr2	NRP2;NRP2;NRP2;NRP2;NRP2;NRP2	NM_201279;NM_018534;NM_201264;NM_201267;NM_003872;NM_201266
68	cg01168535	-0.05621	0.0447042	chr7
69	cg01172484	0.126194	0.0466593	chrX	MAGEH1;MAGEH1	NM_014061;NM_014061
70	cg01174264	0.122228	0.0273092	chr4	ANTXR2;ANTXR2	NM_058172;NM_001145794
71	cg01178486	0.119547	0.033102	chr5	TAF9;RAD17;TAF9;TAF9;RAD17;RAD17;RAD17;TAF9	NM_001015891;NM_133342;NM_003187;NM_001015892;NM_133338;NM_133343;NM_133344;NM_016283
72	cg01179052	-0.0864923	0.047604	chr16
73	cg01181009	0.080522	0.0474094	chr3	C3orf14	NM_020685
74	cg01195545	0.047554	0.0362786	chr7
75	cg01222408	0.0421874	0.0425367	chr15	APH1B;APH1B	NM_001145646;NM_031301
76	cg01285522	-0.0458685	0.045203	chr16	DOK4	NM_018110
77	cg01295673	0.140831	0.043183	chr12	RFC5;RFC5;RFC5;RFC5	NM_001130113;NM_001130112;NM_181578;NM_007370
78	cg01316535	-0.0517582	0.0466862	chr19	ZNF121	NM_001008727
79	cg01324115	-0.0569817	0.0317498	chr19	DEDD2	NM_133328
80	cg01353903	0.187502	0.0445295	chrX	PCDH19;PCDH19	NM_001105243;NM_020766
81	cg01359236	-0.0430137	0.0473504	chr8
82	cg01367737	0.0396641	0.0478603	chr13	NUFIP1;KIAA1704	NM_012345;NM_018559
83	cg01368415	0.0492312	0.0448473	chr11	MRPL11;MRPL11;MRPL11	NM_170739;NM_016050;NM_170738
84	cg01395667	0.204649	0.0357281	chr1	ESPNP	NR_026567
85	cg01398148	-0.0273774	0.0469519	chrX	CXorf27	NM_012274
86	cg01429256	-0.109555	0.0425367	chr17	RAI1	NM_030665
87	cg01441359	-0.061381	0.0474094	chr12	TPI1;TPI1;TPI1	NM_001159287;NR_027483;NM_000365
88	cg01468505	0.0605373	0.0425367	chr2	ORC2L	NM_006190
89	cg01479413	0.12998	0.0336423	chrX	ARHGEF6	NM_004840
90	cg01529201	-0.0422139	0.0421681	chr22
91	cg01530317	-0.0507274	0.0445295	chr1	WDR8;WDR8	NM_017818;NM_017818
92	cg01535733	-0.0592677	0.0377968	chr6	RGS17;RGS17	NM_012419;NM_012419
93	cg01537968	0.178191	0.0473504	chrX	SYTL4;SYTL4;SYTL4	NM_001129896;NM_001129896;NM_080737
94	cg01541867	0.216179	0.0469519	chr9
95	cg01543179	0.176859	0.045203	chr8	NKX3-1	NM_006167
96	cg01563663	-0.026201	0.0457723	chr8	LONRF1	NM_152271
97	cg01597947	0.184516	0.0479258	chrX
98	cg01640808	0.236947	0.0473504	chrX	KLHL34	NM_153270
99	cg01695994	-0.0427129	0.0473504	chr17
100	cg01704999	-0.0702754	0.0474094	chr15	SLC24A1	NM_004727
101	cg01752898	0.120121	0.0472055	chrX	RPGR;RPGR	NM_000328;NM_001034853
102	cg01770831	0.0391557	0.0473504	chr1	SMYD2	NM_020197
103	cg01777812	-0.0512084	0.0469519	chr4
104	cg01811543	-0.0329175	0.0447042	chr20	PCNA;PCNA	NM_182649;NM_002592
105	cg01817069	0.227259	0.0474094	chrX
106	cg01818860	-0.0417741	0.0407056	chr8	RAD21	NM_006265
107	cg01821149	-0.150009	0.0456915	chr11	TNNT3;TNNT3;TNNT3;TNNT3	NM_001042781;NM_006757;NM_001042780;NM_001042782
108	cg01835144	-0.0751481	0.0498273	chr2	HJURP	NM_018410
109	cg01836438	-0.0674548	0.0478603	chr17	TLCD2	NM_001164407
110	cg01872704	-0.0561995	0.0404938	chr16	FAM96B;CES2;CES2;FAM96B	NR_024525;NM_003869;NM_198061;NM_016062
111	cg01882566	-0.166725	0.0472055	chrX	RPGR;RPGR	NM_001034853;NM_000328
112	cg01884384	0.206424	0.049109	chrX	LONRF3;LONRF3	NM_024778;NM_001031855
113	cg01885202	0.092593	0.0401701	chrX	CDKL5	NM_003159
114	cg01895141	-0.0905206	0.0402174	chrX
115	cg01997410	0.255095	0.0336423	chrX	NHSL2;RGAG4	NM_001013627;NM_001024455
116	cg02012821	0.117188	0.0273092	chrX	DIAPH2;DIAPH2	NM_006729;NM_007309
117	cg02022247	0.164322	0.0457723	chrX	ARX	NM_139058
118	cg02034910	0.0953047	0.045203	chr16	NOL3	NM_003946
119	cg02042142	0.146552	0.0488982	chrX	NHS	NM_198270
120	cg02053896	0.0729197	0.0421681	chrX	SLC7A3;SLC7A3	NM_032803;NM_001048164
121	cg02056280	-0.0490044	0.0461266	chr3	PIK3CA	NM_006218
122	cg02060618	-0.164236	0.0435846	chrX	BMP15	NM_005448
123	cg02086387	-0.0299748	0.049109	chr5	GM2A;GM2A	NM_000405;NM_001167607
124	cg02112649	0.129879	0.0466862	chrX	RPS6KA6	NM_014496
125	cg02121547	-0.197167	0.0488164	chr11	CLDN25	NM_001101389
126	cg02121672	0.176111	0.0497496	chrX	PCYT1B;PCYT1B;PCYT1B	NM_001163264;NM_004845;NM_001163265
127	cg02139796	0.0517192	0.0322673	chr6	LOC442245	NR_002932
128	cg02182127	-0.0849617	0.0469519	chr1	SMYD3;SMYD3	NM_022743;NM_001167740
129	cg02211160	-0.0521244	0.047604	chr6	VARS	NM_006295
130	cg02213813	0.11609	0.0425367	chrX
131	cg02246609	0.186838	0.0442877	chr6
132	cg02249911	-0.035123	0.0425367	chr4	CCDC111;CASP3;CASP3	NM_152683;NM_032991;NM_004346
133	cg02280532	-0.0598695	0.0457723	chr2	LY75;LY75	NM_002349;NM_002349
134	cg02301364	0.173467	0.0473504	chrX	PRPS1;PRPS1	NM_002764;NM_002764
135	cg02326006	0.145103	0.0357288	chrX	ARHGEF9;ARHGEF9	NM_015185;NM_015185
136	cg02351160	-0.0318424	0.0472055	chr7
137	cg02356566	-0.0689877	0.0468061	chr10
138	cg02369725	-0.115217	0.0480491	chr2	PDE11A;PDE11A	NM_016953;NM_001077197
139	cg02376524	0.190243	0.0406617	chrX	GPRASP2;GPRASP2	NM_001004051;NM_138437
140	cg02389949	-0.146458	0.045203	chr7	C7orf41	NM_152793
141	cg02466588	-0.039069	0.0471579	chr17
142	cg02478731	0.188156	0.0466862	chr17
143	cg02488934	-0.117263	0.0431106	chr1
144	cg02492740	0.166305	0.0468061	chrX	UBQLN2	NM_013444
145	cg02494368	-0.0475532	0.0457723	chr4	FRAS1;FRAS1	NM_025074;NM_001166133
146	cg02522370	0.269356	0.0472932	chrX	TMSL3;TMSB4X	NM_183049;NM_021109
147	cg02533339	-0.0697716	0.0342656	chr16	MIR365-1	NR_029854
148	cg02537612	-0.0958447	0.0421462	chrX
149	cg02565255	-0.0496175	0.0496861	chr5
150	cg02567488	-0.179082	0.033102	chr6	PSMB9;PSMB9;TAP1	NM_002800;NM_148954;NM_000593
151	cg02610550	0.185407	0.0466862	chr13	KLF12	NM_007249
152	cg02615214	-0.0565071	0.0445295	chr16
153	cg02629737	0.307962	0.0401701	chrX	FGF13;FGF13;FGF13	NM_001139501;NM_001139500;NM_001139498
154	cg02675179	0.0790983	0.0468061	chr16	ACSM1	NM_052956
155	cg02696327	0.155433	0.0498896	chr16	CBLN1	NM_004352
156	cg02713951	-0.0797451	0.0448473	chr22
157	cg02725370	0.0537528	0.0474094	chr4	PITX2;PITX2	NM_153426;NM_153427
158	cg02725485	-0.0705676	0.0402174	chrX	CXorf21	NM_025159
159	cg02726377	0.158266	0.0336423	chr4	SGMS2	NM_001136258
160	cg02727824	-0.0219239	0.04973	chr8	DLC1;DLC1	NM_182643;NM_024767
161	cg02730990	-0.0538393	0.0421462	chr6
162	cg02799972	0.132007	0.0448473	chrX
163	cg02809404	-0.0931068	0.0457723	chr14	FAM71D	NM_173526
164	cg02811232	0.264515	0.0473504	chr18
165	cg02812036	-0.0626028	0.049109	chr17	YBX2	NM_015982
166	cg02903275	-0.0717646	0.0425367	chr14
167	cg02903279	-0.0623233	0.0471537	chr6
168	cg02910910	0.0823138	0.0399916	chr12	ORAI1	NM_032790
169	cg02911957	-0.047584	0.0445295	chr2	NRP2;NRP2;NRP2	NM_201279;NM_003872;NM_201266
170	cg02925799	0.112773	0.0442877	chr17	MPDU1;MPDU1	NR_024603;NM_004870
171	cg02935097	-0.0729843	0.049109	chr1	BRDT	NM_207189
172	cg02953041	-0.0311121	0.0472932	chrX	TMEM35	NM_021637
173	cg02956715	-0.0694282	0.0283551	chr21
174	cg02961707	0.0877077	0.0474094	chr19	EVI5L;EVI5L	NM_145245;NM_001159944
175	cg02975846	0.137562	0.0425367	chrX	NUDT10;NUDT10	NM_153183;NM_153183
176	cg03038395	0.123704	0.0488164	chrX	ARX	NM_139058
177	cg03039483	0.0846677	0.027084	chrX	HDX	NM_144657
178	cg03043296	-0.0856106	0.0466862	chr15	AP3B2	NM_004644
179	cg03060488	-0.0692161	0.0473504	chrX	TAF7L;TAF7L	NM_001168474;NM_024885
180	cg03067599	-0.0440855	0.0445295	chr19	ZNF181;ZNF181	NM_001145665;NM_001029997
181	cg03075244	-0.0672086	0.0466862	chr8
182	cg03089475	0.131992	0.0466862	chr11	ST14	NM_021978
183	cg03092271	-0.184723	0.0466862	chr19	RPSAP58	NR_003662
184	cg03128972	0.0764824	0.0389421	chr17	EPN2;EPN2;EPN2	NM_014964;NM_001102664;NM_148921
185	cg03130664	-0.0847822	0.0336423	chr17	TMUB2;TMUB2;TMUB2;C17orf65;TMUB2	NM_177441;NM_001076674;NM_177441;NM_178542;NM_024107
186	cg03157806	0.16919	0.0436026	chrX	TMEM185A;TMEM185A	NM_032508;NM_032508
187	cg03181118	0.118637	0.0377968	chr3	RAB7A	NM_004637
188	cg03190267	-0.0754694	0.0466584	chr16	NTN3	NM_006181
189	cg03191149	-0.0474714	0.0458701	chrX	CLDN2;CLDN2	NM_001171092;NM_001171095
190	cg03216529	0.127484	0.040692	chr20	TFAP2C	NM_003222
191	cg03217227	-0.194909	0.0405282	chr1	SH3BP5L	NM_030645
192	cg03221483	0.283324	0.0341723	chr17	SEPT9;SEPT9;SEPT9	NM_001113492;NM_001113491;NM_006640
193	cg03246590	0.154811	0.0404938	chrX
194	cg03261155	-0.0643837	0.0497496	chr1	S100A7L2	NM_001045479
195	cg03278989	-0.0621656	0.0447042	chr19	MBOAT7;MBOAT7;MBOAT7;MBOAT7;MBOAT7;MBOAT7;MBOAT7;TSEN34;MBOAT7	NM_001146056;NM_024298;NM_001146082;NM_001146082;NM_024298;NM_001146056;NM_001146083;NM_024075;NM_001146083
196	cg03280108	0.0712729	0.0336423	chr8
197	cg03282439	-0.0484477	0.0407056	chr16	HS3ST6	NM_001009606
198	cg03290131	-0.147075	0.0457723	chr10	DUSP5	NM_004419
199	cg03301200	0.0651271	0.0333101	chr8
200	cg03308628	0.0570577	0.0474094	chr12	USP44;USP44	NM_001042403;NM_032147
201	cg03310087	-0.0483329	0.0407056	chr15	IGF1R	NM_000875
202	cg03324123	-0.0828621	0.0471867	chr1	C1orf198;C1orf198	NM_001136494;NM_032800
203	cg03369250	-0.0408332	0.0392873	chr15	GABPB1;GABPB1;FLJ10038;GABPB1;GABPB1;LOC100129387;GABPB1	NM_002041;NM_181427;NR_026891;NM_016654;NM_016655;NR_024490;NM_005254
204	cg03394722	-0.0873778	0.0424888	chr1
205	cg03411938	-0.140387	0.0488164	chr11	KCNQ1;KCNQ1OT1;KCNQ1	NM_000218;NR_002728;NM_181798
206	cg03424637	0.209128	0.0474094	chrX	AFF2;AFF2;AFF2;AFF2;AFF2	NM_001169125;NM_001169124;NM_001169122;NM_002025;NM_001169123
207	cg03441713	-0.0477971	0.0497536	chr21	UMODL1;UMODL1	NM_173568;NM_001004416
208	cg03478199	0.216147	0.0447042	chr6	GRM1;GRM1;GRM1;GRM1	NM_001114329;NM_001114329;NM_000838;NM_000838
209	cg03478444	-0.061884	0.0342656	chr16	C16orf78	NM_144602
210	cg03514404	0.160202	0.0498946	chr7	FAM115A	NM_014719
211	cg03532926	0.0950999	0.0457723	chr7	DPP6	NM_001039350
212	cg03533058	-0.0318823	0.0445295	chr12
213	cg03567652	-0.112107	0.0336423	chr19	LDLR	NM_000527
214	cg03589259	-0.039601	0.0493488	chr3	BSN	NM_003458
215	cg03607951	-0.0898892	0.0425367	chr1	IFI44L	NM_006820
216	cg03628186	-0.0385193	0.0457723	chr17	SREBF1;SREBF1	NM_004176;NM_001005291
217	cg03659012	0.166489	0.0466862	chrX	ATP7A	NM_000052
218	cg03668687	-0.0358707	0.0404938	chr6	TNXB	NM_019105
219	cg03672203	0.0459983	0.0457723	chr6
220	cg03682719	0.180351	0.0341723	chr6
221	cg03699958	-0.168426	0.0336423	chr7	GTF2IRD1;GTF2IRD1	NM_016328;NM_005685
222	cg03701798	-0.0650397	0.0460376	chr7	USP42	NM_032172
223	cg03728296	0.144713	0.0355317	chr12	SLC26A10	NM_133489
224	cg03753451	0.110358	0.0336423	chrX
225	cg03782202	0.0694361	0.0454439	chr2	HOXD11	NM_021192
226	cg03792162	0.227247	0.0443496	chr4
227	cg03811055	0.0844369	0.0333101	chrX	RBBP7;RBBP7	NM_002893;NM_002893
228	cg03827626	0.158908	0.0425367	chr3	SOX2;SOX2OT;SOX2	NM_003106;NR_004053;NM_003106
229	cg03835038	-0.0471774	0.0346913	chr17
230	cg03838806	-0.0880095	0.040692	chr4
231	cg03848580	-0.195592	0.033102	chr17	TMC6;TMC6	NM_001127198;NM_007267
232	cg03850035	-0.0842979	0.0377968	chr2	EPHA4	NM_004438
233	cg03895857	-0.0481844	0.0457723	chr15	GABRB3;GABRB3	NM_000814;NM_021912
234	cg03918523	0.035807	0.0404938	chr17	RNFT1	NM_016125
235	cg03941517	0.264316	0.0474094	chrX	MOSPD1	NM_019556
236	cg03961984	0.108322	0.0336423	chr1	PARS2	NM_152268
237	cg03991333	0.122543	0.045203	chr1	PANK4	NM_018216
238	cg03996447	0.146652	0.0472055	chrX	MAP3K15	NM_001001671
239	cg04044694	0.114	0.0336423	chrX	HNRNPH2;HNRNPH2;GLA;GLA	NM_019597;NM_001032393;NM_000169;NM_000169
240	cg04072928	0.111042	0.0424888	chr6	CCHCR1;CCHCR1;TCF19;TCF19;CCHCR1;CCHCR1	NM_001105564;NM_001105563;NM_007109;NM_001077511;NM_019052;NM_019052
241	cg04089332	-0.0308319	0.0497496	chr1	MATN1	NM_002379
242	cg04105923	-0.149247	0.0472055	chr6
243	cg04130657	0.110896	0.0471579	chr1	DEDD;DEDD;DEDD	NM_001039711;NM_032998;NM_001039712
244	cg04143870	-0.137447	0.0425367	chrX	GPC4	NM_001448
245	cg04149335	-0.0442975	0.0466862	chr14	THTPA;THTPA;THTPA	NM_024328;NM_001126339;NR_023314
246	cg04166210	0.113586	0.0445295	chrX	RAB9B;RAB9B	NM_016370;NM_016370
247	cg04176472	-0.123107	0.0424888	chr15	GABARAPL3	NR_028287
248	cg04194947	0.169024	0.027084	chr2
249	cg04244354	-0.0748143	0.0457723	chr8
250	cg04270663	0.162741	0.0353041	chrX	UBQLN2	NM_013444
251	cg04303560	-0.140223	0.0488164	chrX	PAGE5;PAGE5	NM_130467;NM_001013435
252	cg04329736	-0.0901908	0.0472055	chrX	TFE3	NM_006521
253	cg04396314	0.0266724	0.0469519	chr11	SCYL1;SCYL1	NM_020680;NM_001048218
254	cg04412186	0.107179	0.0464702	chrX	HDX	NM_144657
255	cg04437407	-0.140228	0.0473504	chr14	SERPINA10;SERPINA10	NM_016186;NM_001100607
256	cg04459413	0.116204	0.0436026	chr13	HSPH1	NM_006644
257	cg04469731	0.156566	0.027084	chr11	APLP2;APLP2;APLP2;APLP2;APLP2;APLP2	NR_024516;NR_024515;NM_001142276;NM_001642;NM_001142277;NM_001142278
258	cg04469998	-0.0789569	0.0466862	chr5
259	cg04476849	0.23145	0.027084	chrX	MIR1256	NR_031657
260	cg04478251	0.182857	0.0404938	chr17	ABR;ABR;ABR	NM_021962;NM_001092;NM_001159746
261	cg04489846	0.0356872	0.0454439	chr17	LRRC45;STRA13	NM_144999;NM_144998
262	cg04500377	-0.054267	0.0447042	chr8	DDHD2;DDHD2;DDHD2	NM_001164232;NM_015214;NM_001164234
263	cg04501372	0.292424	0.027084	chrX	SCML1;SCML1;SCML1;SCML1	NM_001037540;NM_001037536;NM_001037535;NM_006746
264	cg04528024	-0.0327762	0.035974	chr13	ING1;ING1;ING1;ING1	NM_198217;NM_198219;NM_005537;NM_198218
265	cg04531694	-0.0628886	0.0341723	chr7	CDK5;CDK5;SLC4A2	NM_004935;NM_001164410;NM_003040
266	cg04533699	-0.0682056	0.0336423	chr4	KIAA1712;FBXO8;KIAA1712;FBXO8	NM_001040157;NM_012180;NM_001145314;NM_012180
267	cg04535803	0.206794	0.0342656	chrX
268	cg04568492	0.110191	0.0491012	chr1	ACTA1	NM_001100
269	cg04569429	0.166592	0.0469519	chr17	LASP1	NM_006148
270	cg04570735	0.261128	0.0453544	chr19	PDE4C;PDE4C;PDE4C	NM_001098819;NM_001098818;NM_000923
271	cg04613080	-0.0905718	0.0425367	chrX	CNGA2	NM_005140
272	cg04624362	-0.0305426	0.0401701	chr15	SEMA4B	NM_020210
273	cg04642759	0.185533	0.0460449	chrX	SLITRK2;SLITRK2;SLITRK2;SLITRK2	NM_001144004;NM_001144003;NM_032539;NM_001144005
274	cg04676715	-0.052017	0.0363425	chr16	TSNAXIP1;RANBP10	NM_018430;NM_020850
275	cg04714939	-0.0506075	0.0427326	chr10	ZMIZ1	NM_020338
276	cg04762129	-0.117321	0.0468061	chr6
277	cg04774951	-0.131795	0.0474094	chrX	IL1RAPL2;TEX13A	NM_017416;NM_031274
278	cg04777103	0.0795453	0.0487868	chrX	MCTS1;MCTS1	NM_001137554;NM_014060
279	cg04781148	-0.0480932	0.047604	chr6	RXRB;SLC39A7;RXRB;SLC39A7	NM_021976;NM_001077516;NM_021976;NM_006979
280	cg04784122	0.132309	0.0447042	chrX	MPP1;MPP1;MPP1;MPP1;MPP1;MPP1;MPP1;MPP1	NM_001166462;NM_001166460;NM_001166461;NM_001166462;NM_002436;NM_001166460;NM_001166461;NM_002436
281	cg04805619	0.0465047	0.0497496	chr3	ZBBX	NM_024687
282	cg04810007	-0.0496339	0.0322673	chr14
283	cg04813911	-0.164187	0.0406698	chr15	CILP	NM_003613
284	cg04815601	-0.0607458	0.0478603	chr16	ZNF646	NM_014699
285	cg04852443	0.140256	0.027084	chr1	PRDM16;PRDM16	NM_022114;NM_199454
286	cg04867738	0.139498	0.0357281	chr17	UBTF;UBTF	NM_001076684;NM_001076683
287	cg04870110	-0.0700054	0.0335782	chr6
288	cg04871460	-0.072553	0.0466862	chr1	PRKCZ	NM_002744
289	cg04874562	-0.144253	0.0260798	chr11	OR51I1	NM_001005288
290	cg04875162	0.10524	0.0474094	chrX	PABPC5;PABPC5	NM_080832;NM_080832
291	cg04888174	-0.0677366	0.0498273	chr12
292	cg04964333	0.11537	0.0445295	chr20	LPIN3;LPIN3	NM_022896;NM_022896
293	cg04972529	-0.066128	0.0473504	chr10	TACC2;TACC2	NM_206862;NM_206861
294	cg04978107	-0.0730035	0.0441969	chr14	DHRS4L2	NM_198083
295	cg04996918	-0.0741906	0.0404938	chr10	ENTPD7	NM_020354
296	cg05021029	-0.110434	0.0492085	chr10
297	cg05023116	-0.0232279	0.0472055	chr19	NLRP5	NM_153447
298	cg05025162	-0.0333145	0.0425367	chr19	TRIM28	NM_005762
299	cg05029625	0.244754	0.0497952	chrX
300	cg05049933	0.125707	0.0425367	chrX	MCART6;ZCCHC18;ZCCHC18;ZCCHC18	NM_001012755;NR_026694;NM_001143978;NM_001143978
301	cg05052243	-0.0587851	0.0472055	chrX	SAGE1	NM_018666
302	cg05073171	0.11924	0.049109	chrX	NCRNA00087	NR_024493
303	cg05083033	0.0674108	0.0336423	chr7	CREB5;CREB5;CREB5;CREB5	NM_004904;NM_182899;NM_001011666;NM_182898
304	cg05085049	0.118882	0.0488164	chrX	DUSP9	NM_001395
305	cg05131766	-0.0615275	0.027084	chr16	PHKB;PHKB;ITFG1	NM_001031835;NM_000293;NM_030790
306	cg05138787	-0.0389769	0.0472055	chr5	TRIO	NM_007118
307	cg05143403	0.168507	0.049109	chrX	RRAGB;RRAGB	NM_006064;NM_016656
308	cg05143954	0.0983981	0.0401701	chr8	UBR5	NM_015902
309	cg05170275	0.126088	0.0407056	chr6	PRDM1	NM_001198
310	cg05177544	-0.134916	0.0466862	chrX
311	cg05179125	0.165133	0.0445295	chr11	HRASLS5;HRASLS5;HRASLS5	NM_001146729;NM_054108;NM_001146728
312	cg05289639	0.0314692	0.0497496	chr15	BUB1B	NM_001211
313	cg05294909	0.32304	0.0357281	chrX	SCML1;SCML1;SCML1;SCML1	NM_001037540;NM_001037536;NM_001037535;NM_006746
314	cg05297677	-0.0837499	0.043183	chr10
315	cg05298458	0.122906	0.049109	chr22	TBX1;TBX1;TBX1	NM_080647;NM_005992;NM_080646
316	cg05305046	0.244806	0.0472055	chr5	CARD6	NM_032587
317	cg05331252	-0.0318952	0.0466862	chr13
318	cg05338745	0.03563	0.0402174	chr12	CCDC59;CCDC59;C12orf26;CCDC59	NR_033192;NM_014167;NM_032230;NM_014167
319	cg05344293	-0.0872209	0.0336423	chr16	COTL1	NM_021149
320	cg05346902	0.0997341	0.0449352	chr19	MEIS3;MEIS3	NM_001009813;NM_020160
321	cg05355301	-0.126569	0.0407056	chr17	KRT40	NM_182497
322	cg05369327	0.159175	0.0497496	chr14
323	cg05371791	-0.0463104	0.0401701	chr2	ANKMY1;ANKMY1	NM_017844;NM_016552
324	cg05381423	0.110789	0.0404938	chr19	PTPRS;PTPRS;PTPRS;PTPRS;PTPRS;PTPRS;PTPRS;PTPRS	NM_130855;NM_130854;NM_002850;NM_130853;NM_130855;NM_002850;NM_130853;NM_130854
325	cg05385163	0.0451322	0.0375914	chr9	BARX1	NM_021570
326	cg05385282	-0.024668	0.0488164	chr1
327	cg05400741	-0.0482523	0.049109	chr10	TET1	NM_030625
328	cg05422836	0.0806741	0.0424888	chr8
329	cg05437059	-0.0580148	0.0473504	chrX	KCNE1L	NM_012282
330	cg05444994	0.181174	0.0314894	chrX	CNKSR2;CNKSR2;CNKSR2;CNKSR2	NM_001168647;NM_001168649;NM_014927;NM_001168648
331	cg05448404	0.055032	0.0445295	chr4	CPLX1	NM_006651
332	cg05463027	-0.194186	0.0498896	chr6	KIF13A;KIF13A;KIF13A;KIF13A	NM_001105567;NM_001105566;NM_001105568;NM_022113
333	cg05479618	0.0976669	0.0464702	chr11
334	cg05516489	0.0958585	0.0357281	chr12	HOTAIR	NR_003716
335	cg05521581	-0.0633343	0.0481656	chr16	MMP15	NM_002428
336	cg05527785	0.159485	0.0441969	chr17	HOXB4	NM_024015
337	cg05548912	0.0739888	0.0394755	chr17
338	cg05555396	0.0623721	0.0474094	chr12
339	cg05569203	-0.0546635	0.0474094	chr5	PLCXD3	NM_001005473
340	cg05575614	0.416474	0.0336423	chr6
341	cg05666607	-0.0626922	0.0445295	chr5	POU4F3	NM_002700
342	cg05726109	0.363767	0.045203	chr22	SEPT5;GP1BB	NM_002688;NM_000407
343	cg05794813	-0.0782354	0.0341723	chr7	C7orf50;C7orf50;C7orf50	NM_001134395;NM_032350;NM_001134396
344	cg05802990	-0.0317952	0.0466593	chr6	C6orf195	NM_152554
345	cg05876738	0.0273703	0.0492346	chr7	CALCR;CALCR	NM_001164737;NM_001742
346	cg05887304	0.243844	0.0447042	chrX	PRPS2;PRPS2;PRPS2;PRPS2	NM_002765;NM_001039091;NM_002765;NM_001039091
347	cg05898591	0.0403747	0.045203	chr5
348	cg05902740	-0.0700208	0.0497496	chrX	RGAG1	NM_020769
349	cg05923785	0.121765	0.0474094	chr5	LIFR;LIFR	NM_001127671;NM_002310
350	cg05926269	0.0981127	0.0336423	chr20	GNAS;GNAS;GNAS;GNAS	NM_001077490;NM_016592;NR_003259;NM_080425
351	cg05933703	0.104302	0.0322673	chrX
352	cg05944661	-0.114672	0.0498896	chr1
353	cg05945943	0.136833	0.0357281	chr18	BCL2;BCL2	NM_000657;NM_000633
354	cg05949800	0.0571505	0.045203	chr10	NKX2-3	NM_145285
355	cg05962511	0.172381	0.0472055	chr10
356	cg05968822	-0.0940978	0.0357281	chr1	TMEM63A	NM_014698
357	cg05975021	-0.046017	0.0469519	chrX	ARHGAP6;AMELX;AMELX;AMELX;ARHGAP6	NM_013427;NM_001142;NM_182681;NM_182680;NM_006125
358	cg05996238	-0.101907	0.049109	chrX	PAGE2	NM_207339
359	cg06048102	-0.0366632	0.0474094	chr13	GUCY1B2	NR_003923
360	cg06065608	-0.170693	0.0425367	chr6	PACRG;PACRG;PARK2;PACRG;PARK2;PARK2	NM_152410;NM_001080379;NM_004562;NM_001080378;NM_013987;NM_013988
361	cg06068202	0.237558	0.049109	chrX
362	cg06126323	0.176226	0.0404938	chrX	EDA;EDA;EDA;EDA;EDA;EDA	NM_001005612;NM_001399;NM_001005609;NM_001005611;NM_001005615;NM_001005610
363	cg06137672	0.108056	0.0488164	chrX	IDH3G;SSR4;IDH3G	NM_174869;NM_006280;NM_004135
364	cg06149454	0.110797	0.0336423	chrX
365	cg06170215	0.115071	0.0469519	chrX	CITED1;CITED1;CITED1;CITED1	NM_001144886;NM_004143;NM_001144885;NM_001144887
366	cg06190046	-0.299756	0.0497496	chr16	OSGIN1;OSGIN1;OSGIN1	NM_182980;NM_182981;NM_013370
367	cg06196145	-0.10798	0.0322673	chr11	PNPLA2	NM_020376
368	cg06202053	0.120971	0.0498896	chr11	CCDC88B	NM_032251
369	cg06205205	-0.025719	0.0460129	chrX
370	cg06219267	0.0263952	0.0466593	chr7	FBXO24;LRCH4;FBXO24	NM_033506;NM_002319;NM_033506
371	cg06266100	-0.0448949	0.0424888	chr3	LMCD1	NM_014583
372	cg06269080	0.178215	0.0473504	chrX	PHKA2	NM_000292
373	cg06345952	-0.0572855	0.0445295	chr16	FAM57B	NM_031478
374	cg06346081	0.131909	0.0472055	chr1	PPCS;ZMYND12;ZMYND12;PPCS;ZMYND12	NM_024664;NM_032257;NM_001146192;NM_001077447;NM_001146192
375	cg06365984	0.0928384	0.0407056	chr18	FAM69C	NM_001044369
376	cg06367311	0.230358	0.0466862	chr16	PLLP	NM_015993
377	cg06367925	-0.0317667	0.0472055	chr11
378	cg06375148	0.0781852	0.027084	chr1	C1orf74	NM_152485
379	cg06401999	-0.0317949	0.0466862	chr10	MGMT	NM_002412
380	cg06407259	-0.162825	0.0353514	chr16	FBXL19	NM_001099784
381	cg06416060	0.0781216	0.0488164	chr4
382	cg06431415	-0.121863	0.0407056	chrX	GPC3;GPC3;GPC3;GPC3	NM_001164617;NM_001164618;NM_001164619;NM_004484
383	cg06438727	-0.0567004	0.027084	chrX	LRCH2	NM_020871
384	cg06464594	0.0570038	0.0407056	chr18	RNF152;RNF152	NM_173557;NM_173557
385	cg06466031	0.240606	0.0449352	chr19	ZNF790	NM_206894
386	cg06466203	-0.0834712	0.027084	chr10	PTEN;KILLIN;PTEN	NM_000314;NM_001126049;NM_000314
387	cg06472116	-0.050107	0.0445295	chrX	RGN;RGN	NM_152869;NM_004683
388	cg06482534	-0.0668884	0.0474094	chr19	PPP5C	NM_006247
389	cg06499778	-0.027416	0.045203	chr11
390	cg06500120	0.0798454	0.0232342	chr4	GSX2	NM_133267
391	cg06525551	0.19286	0.0454439	chrX	FGF13;FGF13;FGF13;FGF13;FGF13;FGF13	NM_001139500;NM_004114;NM_001139502;NM_001139501;NM_001139498;NM_033642
392	cg06542022	0.0913922	0.0447042	chr7
393	cg06544316	-0.0755564	0.0466862	chr11	KIAA1731	NM_033395
394	cg06552182	0.0400335	0.0469519	chr19
395	cg06560760	0.0475169	0.0497496	chr10	ARMC3	NM_173081
396	cg06578434	0.105774	0.0389421	chr19	SBNO2	NM_014963
397	cg06588605	0.0820019	0.0490063	chr20	TGIF2	NM_021809
398	cg06597858	-0.0493367	0.0466862	chr10	TACR2	NM_001057
399	cg06598386	-0.262672	0.0472055	chr12
400	cg06619487	0.177156	0.0425367	chrX	PTCHD1	NM_173495
401	cg06620972	-0.0222986	0.0407056	chr3	LOC90246	NR_026954
402	cg06631944	-0.138579	0.0472055	chr7	PTPRN2;PTPRN2;PTPRN2	NM_002847;NM_130842;NM_130843
403	cg06638529	0.170851	0.0488164	chr1	ERI3	NM_024066
404	cg06648455	-0.0631831	0.027084	chr11	ANO1;ANO1	NM_018043;NR_030691
405	cg06672737	0.146773	0.0474094	chr4	CPLX1	NM_006651
406	cg06697829	0.103359	0.0469519	chr2	FZD5	NM_003468
407	cg06715352	0.214031	0.0497496	chr16	CMTM4;CMTM4	NM_178818;NM_181521
408	cg06742077	0.336703	0.0474094	chr8	MIR596	NR_030326
409	cg06746903	0.177958	0.0466862	chrX	MIR1256	NR_031657
410	cg06773488	-0.0428803	0.0474094	chr18	MBP;MBP;MBP;MBP;MBP;MBP	NM_001025090;NM_002385;NM_001025092;NM_001025081;NM_001025101;NM_001025100
411	cg06774124	0.127719	0.0466862	chrX	TSC22D3;TSC22D3;TSC22D3	NM_001015881;NM_004089;NM_198057
412	cg06781608	-0.0527988	0.0481656	chr7	PTPRN2;PTPRN2;PTPRN2	NM_002847;NM_130842;NM_130843
413	cg06801028	0.239406	0.0407056	chr10	NCOA4;NCOA4;NCOA4;NCOA4;NCOA4	NM_005437;NM_001145263;NM_001145261;NM_001145262;NM_001145260
414	cg06817490	0.0954841	0.0322673	chr17
415	cg06858559	0.121694	0.0232342	chr3	SRGAP3;SRGAP3	NM_001033117;NM_014850
416	cg06879518	0.0692107	0.0486489	chr7	MEOX2;MEOX2	NM_005924;NM_005924
417	cg06894687	-0.0343085	0.0471023	chr1	QSOX1;QSOX1	NM_001004128;NM_002826
418	cg06895664	0.0878855	0.0406617	chr8	SAMD12;SAMD12	NM_001101676;NM_207506
419	cg06939792	0.220635	0.0461649	chrX
420	cg06974662	0.149148	0.0404938	chr1
421	cg06982551	-0.0608404	0.0497496	chr16	PDPK1;PDPK1	NM_031268;NM_002613
422	cg07046369	0.202236	0.0357281	chr10	PAX2;PAX2;PAX2;PAX2;PAX2	NM_000278;NM_003987;NM_003989;NM_003988;NM_003990
423	cg07056567	-0.0658892	0.0469519	chr7	GNB2	NM_005273
424	cg07068655	-0.0931891	0.0474094	chr8	LOC340357	NR_015383
425	cg07079719	-0.0672514	0.0490063	chr19
426	cg07130494	-0.0522291	0.0447042	chr6	PTPRK;PTPRK	NM_002844;NM_001135648
427	cg07158747	0.101559	0.0355317	chr1
428	cg07159518	0.0601398	0.0445295	chr13
429	cg07204874	0.106405	0.0448473	chr1
430	cg07206712	0.0428815	0.0336423	chr15
431	cg07223177	0.159896	0.0421415	chrX	CHST7	NM_019886
432	cg07233483	-0.106282	0.0404938	chr5	GALNT10;GALNT10	NM_017540;NM_198321
433	cg07240096	0.114308	0.0498896	chrX	GPKOW	NM_015698
434	cg07251197	0.0401533	0.0498896	chr1
435	cg07253552	0.256189	0.0404938	chrX	MBNL3	NM_001170704
436	cg07264097	0.297525	0.0481656	chrX	BCYRN1;TAF1;TAF1	NR_001568;NM_004606;NM_138923
437	cg07309821	0.131883	0.049109	chrX	SPIN4	NM_001012968
438	cg07311505	0.0581625	0.037697	chr22	CBX7	NM_175709
439	cg07314680	0.0767004	0.0472055	chr6	C6orf52;PAK1IP1;C6orf52;C6orf52	NR_026736;NM_017906;NM_001145020;NR_026737
440	cg07314984	0.0953474	0.027084	chrX	PHKA2	NM_000292
441	cg07354666	0.131873	0.0447042	chrX	EBP	NM_006579
442	cg07363185	0.0260877	0.0457723	chr2
443	cg07388258	0.0847915	0.0478603	chrX
444	cg07392449	0.047688	0.043153	chr8	FAM167A	NM_053279
445	cg07416975	-0.0245585	0.0441969	chr4	PCGF3	NM_006315
446	cg07423997	-0.1119	0.0447042	chr1
447	cg07435359	0.0636228	0.0474094	chr15	FAM189A1	NM_015307
448	cg07476944	0.0370879	0.0454439	chr4	PDS5A;PDS5A;PDS5A	NM_015200;NM_001100400;NM_001100399
449	cg07524679	0.0509711	0.0466862	chr2	TLX2	NM_016170
450	cg07554046	-0.105452	0.0336423	chr11
451	cg07605754	0.130299	0.0466862	chrX	CLCN5;CLCN5	NM_001127899;NM_001127898
452	cg07625783	-0.129247	0.0474094	chr1	SLAMF8;SLAMF8	NM_020125;NM_020125
453	cg07645296	0.101617	0.0447042	chr12	ITPR2	NM_002223
454	cg07653699	0.15753	0.0472055	chrX	FGF13;FGF13;FGF13	NM_001139501;NM_001139500;NM_001139498
455	cg07659934	0.0476447	0.0407056	chr4	PAPSS1	NM_005443
456	cg07680167	0.111539	0.0445295	chr11
457	cg07681834	0.0299075	0.0491005	chr4
458	cg07689032	0.208856	0.0466862	chr12	MARS	NM_004990
459	cg07698196	-0.0766968	0.0342656	chr7	LOC100128542	NM_001162367
460	cg07701018	-0.0648864	0.047604	chr8	FABP5	NM_001444
461	cg07704242	-0.08928	0.0357281	chr1	NBPF4	NM_001143989
462	cg07721569	0.0627365	0.0399916	chr6	TFAP2A	NM_001042425
463	cg07734869	0.137972	0.043183	chrX	TIMM17B;PQBP1;PQBP1;PQBP1;PQBP1;PQBP1;PQBP1;TIMM17B;PQBP1;PQBP1	NM_001167947;NM_144495;NM_001032383;NM_001167989;NM_001032384;NM_001032381;NM_001167990;NM_005834;NM_005710;NM_001032382
464	cg07764916	-0.0485784	0.0485496	chr19
465	cg07766847	0.102796	0.0447042	chr19	DAZAP1;DAZAP1	NM_170711;NM_018959
466	cg07780118	0.112407	0.0469519	chrX	AR	NM_000044
467	cg07804076	0.0875876	0.0447042	chr5	PCDHGA4;PCDHGA2;PCDHGB2;PCDHGA1;PCDHGB1;PCDHGA3;PCDHGB2	NM_018917;NM_018915;NM_018923;NM_018912;NM_018922;NM_018916;NM_032096
468	cg07888193	-0.0848014	0.0247879	chr5
469	cg07888205	0.0361329	0.0380156	chr16
470	cg07897414	0.065259	0.0466862	chrX	KLHL4;KLHL4;KLHL4;KLHL4	NM_019117;NM_057162;NM_019117;NM_057162
471	cg07906855	0.0633827	0.0466862	chr3
472	cg07919108	0.0522473	0.0474094	chr10
473	cg08029909	-0.034515	0.0473504	chr5	UNC5A	NM_133369
474	cg08050748	0.0901155	0.0407056	chr14	TRIM9;TRIM9	NM_052978;NM_015163
475	cg08053103	-0.138219	0.0445295	chr19
476	cg08080174	-0.0557913	0.0448473	chr16	ZFHX3;ZFHX3	NM_006885;NM_001164766
477	cg08083403	-0.0408417	0.027084	chr16	TNRC6A	NM_014494
478	cg08087911	0.230249	0.0469519	chrX	TRMT2B;TRMT2B;TRMT2B;TRMT2B;TRMT2B;TRMT2B;TRMT2B;TRMT2B	NM_024917;NM_001167972;NM_001167971;NM_001167970;NM_001167971;NM_001167970;NM_024917;NM_001167972
479	cg08108965	0.207076	0.0457723	chr1
480	cg08119295	0.162872	0.0448959	chrX	TCEAL7	NM_152278
481	cg08130682	0.193787	0.0407056	chrX	STAG2	NM_001042749
482	cg08132025	0.047777	0.0488779	chr6	SYNJ2	NM_003898
483	cg08190175	-0.0224099	0.0474094	chr22
484	cg08190858	0.0443849	0.0472055	chr12
485	cg08195538	0.244183	0.027084	chrX	STARD8;STARD8;STARD8	NM_001142504;NM_014725;NM_001142503
486	cg08199273	0.0680165	0.0472055	chr10	GLRX3	NM_006541
487	cg08236172	-0.0337321	0.045986	chrX
488	cg08237551	-0.0483183	0.0495597	chr12	TMEM120B;RHOF	NM_001080825;NM_019034
489	cg08260658	0.0676872	0.0404938	chr5
490	cg08272835	-0.0218724	0.0473504	chr4	PDCL2	NM_152401
491	cg08274821	-0.0451075	0.0478603	chr1	PTPN14	NM_005401
492	cg08357990	-0.175105	0.0474094	chr2	LTBP1;LTBP1;LTBP1;LTBP1;LTBP1	NM_001166265;NM_000627;NM_206943;NM_001166264;NM_001166266
493	cg08416046	0.0731148	0.0498896	chrX	IRS4	NM_003604
494	cg08427977	0.121391	0.0425367	chr10	C10orf72;C10orf72	NM_001031746;NM_144984
495	cg08441029	-0.0280436	0.0448473	chr10	CUGBP2;CUGBP2	NM_006561;NM_001025077
496	cg08460331	0.121682	0.0336423	chrX	ARMCX4	NR_028407
497	cg08462501	0.158033	0.047604	chr4	TBC1D1	NM_015173
498	cg08470131	0.298996	0.0362786	chrX	DGKK	NM_001013742
499	cg08474403	-0.0599428	0.0387447	chr1	DEPDC1;DEPDC1;DEPDC1;DEPDC1	NM_001114120;NM_017779;NM_001114120;NM_017779
500	cg08480367	0.288001	0.0425367	chrX	SRPX;SRPX;SRPX;SRPX	NM_001170752;NM_006307;NM_001170751;NM_001170750
501	cg08492178	-0.0912033	0.0445295	chr8
502	cg08495115	0.0441633	0.0409256	chr15	GREM1	NM_013372
503	cg08501420	0.103964	0.0447042	chr12
504	cg08529529	0.0747405	0.045203	chr13	ALOX5AP	NM_001629
505	cg08539067	-0.0648091	0.0401701	chr3	GPX1;GPX1	NM_000581;NM_201397
506	cg08570243	0.177672	0.0445295	chr2	NCRNA00116	NR_027063
507	cg08592423	0.0908793	0.0474094	chr12	FAM60A;FLJ13224;FAM60A;FAM60A	NM_021238;NR_026806;NM_001135811;NM_001135812
508	cg08599249	-0.0677556	0.0404938	chr8
509	cg08610278	0.172228	0.0322673	chrX	APLN	NM_017413
510	cg08644498	-0.14465	0.021679	chr1
511	cg08690412	-0.0708935	0.0466862	chr3	SRGAP3;SRGAP3	NM_001033117;NM_014850
512	cg08706575	0.0488725	0.0466593	chr11	UBASH3B	NM_032873
513	cg08715431	0.118899	0.0466862	chr8	SNORD54;RPS20;RPS20	NR_002437;NM_001023;NM_001146227
514	cg08726667	-0.0931521	0.0357281	chr16	CCDC101	NM_138414
515	cg08732418	-0.0373464	0.0490063	chr15	DLL4	NM_019074
516	cg08736918	-0.0444675	0.0473504	chr1
517	cg08751025	-0.154713	0.0407056	chr2
518	cg08760398	0.249554	0.0497496	chrX	FAM70A;FAM70A;FAM70A	NM_017938;NM_001104544;NM_001104545
519	cg08785215	-0.056737	0.0470344	chr3	FLNB;FLNB;FLNB;FLNB	NM_001164318;NM_001164317;NM_001457;NM_001164319
520	cg08817171	-0.0351377	0.0475661	chr15	KIF23;KIF23	NM_138555;NM_004856
521	cg08838779	0.114579	0.0413108	chr8
522	cg08852894	-0.0694046	0.0407056	chr17
523	cg08869118	-0.0713346	0.0498896	chr12	MLXIP	NM_014938
524	cg08893692	0.0289641	0.0486489	chr5
525	cg08920068	0.0388882	0.0473504	chr5	LOX	NM_002317
526	cg08944961	0.113216	0.0395046	chr12	CUX2	NM_015267
527	cg09010017	-0.0547409	0.0490063	chr8
528	cg09012264	0.268272	0.0473504	chrX	SEPT6;SEPT6;SEPT6;SEPT6	NM_015129;NM_145800;NM_145802;NM_145799
529	cg09022485	-0.0708994	0.0211516	chr2	TIA1;TIA1;TIA1;TIA1	NM_022173;NM_022037;NM_022037;NM_022173
530	cg09055253	0.142872	0.0478603	chrX	DKC1;DKC1	NM_001363;NM_001142463
531	cg09092713	0.228367	0.0357281	chrX
532	cg09144786	0.13498	0.0498896	chrX	WDR44	NM_019045
533	cg09161455	0.0606021	0.0407056	chr17	NR1D1	NM_021724
534	cg09182750	-0.0255275	0.0380156	chr15
535	cg09200260	0.143026	0.0322673	chr21
536	cg09209584	-0.0720319	0.0421681	chrX	FHL1;FHL1;FHL1;FHL1;FHL1;FHL1;FHL1;FHL1;FHL1	NM_001167819;NM_001159700;NR_027621;NM_001159701;NM_001159703;NM_001159702;NM_001159699;NM_001159704;NM_001449
537	cg09236098	-0.0683225	0.0350204	chr1	DVL1	NM_004421
538	cg09277772	0.285274	0.0336423	chrX	AR;AR	NM_000044;NM_000044
539	cg09290600	0.302213	0.0407056	chr4
540	cg09332981	-0.078011	0.0474094	chrX	GPRASP1;GPRASP1;GPRASP1	NM_014710;NM_001099411;NM_001099410
541	cg09337121	-0.0924541	0.0404938	chr14	PPP1R3E	NR_026862
542	cg09404643	-0.0705886	0.0477193	chr6	AIM1	NM_001624
543	cg09475041	-0.254054	0.0431106	chrX	F9	NM_000133
544	cg09503234	-0.0271204	0.0497496	chr11	INS-IGF2;IGF2;IGF2;IGF2	NR_003512;NM_001007139;NM_000612;NM_001127598
545	cg09514055	-0.0441255	0.0462354	chr1	HYI	NM_031207
546	cg09523691	-0.170572	0.0466862	chr5	ATG12;AP3S1	NM_004707;NM_001284
547	cg09579413	-0.0619594	0.0336423	chr1	RUSC1;FDPS;FDPS;RUSC1;FDPS	NM_001105204;NM_001135822;NM_001135821;NM_001105203;NM_002004
548	cg09580336	0.158371	0.0377968	chr1	ATP1A1;ATP1A1	NM_001160233;NM_000701
549	cg09581098	0.0642612	0.0336423	chrX	SEPT6;SEPT6;SEPT6;SEPT6;SEPT6;SEPT6;SEPT6;SEPT6	NM_145799;NM_015129;NM_145800;NM_015129;NM_145800;NM_145802;NM_145802;NM_145799
550	cg09607043	0.203836	0.0485019	chr17
551	cg09614279	-0.136712	0.0457723	chrX	UBE2DNL	NR_024062
552	cg09620718	-0.0916392	0.0399916	chr16	ACSM1	NM_052956
553	cg09657185	-0.103252	0.0445295	chr6	GRM4	NM_000841
554	cg09662034	0.239403	0.033102	chr20	TFAP2C	NM_003222
555	cg09666417	-0.0503724	0.0466862	chr5	DNAJC18	NM_152686
556	cg09684112	0.136447	0.0473274	chr10	FRMD4A	NM_018027
557	cg09704401	-0.081725	0.0407056	chr2
558	cg09706243	-0.139124	0.0490063	chr11	LOC100130987;POLD4	NR_024469;NM_021173
559	cg09791535	-0.200948	0.0425367	chrX	GPC4	NM_001448
560	cg09799186	-0.0622765	0.0474094	chr15
561	cg09804380	0.0337993	0.0498946	chr1	PDPN;PDPN;PDPN;PDPN	NM_001006624;NM_001006625;NM_006474;NM_198389
562	cg09804616	-0.0510223	0.0457723	chr6	KIAA1949;KIAA1949	NM_001134870;NM_133471
563	cg09815545	0.223583	0.0474094	chrX	LOC92249	NR_015353
564	cg09845941	0.183603	0.0394755	chr1	IGSF21	NM_032880
565	cg09861917	0.116905	0.0469519	chr20	FOXA2	NM_153675
566	cg09866208	-0.0408532	0.0442877	chr16	C16orf80	NM_013242
567	cg09895514	-0.0256438	0.049109	chr1	TSNAX-DISC1;DISC1;TSNAX-DISC1;DISC1;DISC1;DISC1;TSNAX-DISC1;DISC1;TSNAX-DISC1;DISC1;DISC1;DISC1;DISC1;DISC1;DISC1;DISC1;TSNAX-DISC1;DISC1;DISC1;TSNAX-DISC1;DISC1;DISC1	NR_028394;NM_001012959;NR_028397;NM_001012957;NM_001164541;NM_001164542;NR_028393;NM_001164537;NR_028398;NM_001164548;NM_018662;NM_001164539;NM_001164556;NM_001164549;NM_001164540;NM_001164544;NR_028395;NM_001164538;NM_001164545;NR_028396;NM_001164547;NM_001164546
568	cg09899173	0.0417688	0.0357281	chr8	MIR596	NR_030326
569	cg09935371	-0.0905438	0.0407056	chr15	ULK3	NM_001099436
570	cg09952946	-0.0475716	0.049109	chr1	BATF3	NM_018664
571	cg09963125	-0.117626	0.0447042	chrX
572	cg10052922	0.192415	0.0479791	chrX	FGF13;FGF13;FGF13	NM_001139501;NM_001139500;NM_001139498
573	cg10055173	0.186175	0.0490063	chrX	PLP2	NM_002668
574	cg10060499	-0.0211809	0.049109	chrX
575	cg10061906	-0.0339241	0.0406617	chr8	ZNF34	NM_030580
576	cg10064814	-0.0836268	0.0497496	chrX	CXorf40B	NM_001013845
577	cg10072162	-0.0723192	0.0471579	chrX	SSX5;SSX5	NM_021015;NM_175723
578	cg10076009	0.111224	0.0406617	chrX	SMARCA1;SMARCA1	NM_139035;NM_003069
579	cg10090585	0.0983481	0.0322673	chrX	ENOX2;ENOX2	NM_182314;NM_006375
580	cg10100747	0.0372034	0.0474094	chr14
581	cg10107473	-0.0339903	0.0497496	chr2	EPAS1	NM_001430
582	cg10126181	-0.127096	0.0401701	chr6	FLJ22536	NR_015410
583	cg10164191	-0.112823	0.0470944	chrX	AR	NM_000044
584	cg10221172	-0.0690442	0.0478603	chr6	SASH1	NM_015278
585	cg10237576	0.271688	0.0401701	chrX	WDR13;WDR13;WDR13	NR_029427;NM_017883;NM_001166426
586	cg10258860	-0.0702125	0.0491005	chr15
587	cg10259748	0.127235	0.049109	chr6	C6orf186	NM_001123364
588	cg10261457	0.0443792	0.0357288	chrX	SAGE1;SAGE1	NM_018666;NM_018666
589	cg10290373	-0.048987	0.0445295	chr9	NTNG2	NM_032536
590	cg10299448	0.0522405	0.0472055	chr17	GAS7	NM_201433
591	cg10308137	0.0539659	0.0407056	chrX	SAT1;SAT1	NR_027783;NM_002970
592	cg10320061	0.242933	0.0466862	chrX	PDZD4	NM_032512
593	cg10328297	-0.113242	0.0466593	chr13	SLC25A15	NM_014252
594	cg10359006	-0.112334	0.0490063	chr11	ARRB1;ARRB1	NM_020251;NM_004041
595	cg10371414	0.188195	0.0466862	chr16
596	cg10371523	-0.0573158	0.0392873	chr11	SHANK2;SHANK2	NM_012309;NM_133266
597	cg10393811	-0.0715174	0.0482916	chr2	HOXD10	NM_002148
598	cg10422709	0.36761	0.0468061	chr15
599	cg10425032	0.17904	0.0474094	chrX	CUL4B;CUL4B	NM_003588;NM_001079872
600	cg10428230	-0.132079	0.0488164	chrX
601	cg10436191	-0.0852088	0.0488164	chrX	SNORA35;HTR2C	NR_002993;NM_000868
602	cg10504365	0.122337	0.0447042	chr1	TRIM67	NM_001004342
603	cg10515414	-0.0721704	0.043183	chr1	FHAD1	NM_052929
604	cg10530128	0.210118	0.045203	chrX	SLC35A2;SLC35A2;SLC35A2	NM_001032289;NM_001042498;NM_005660
605	cg10534923	-0.0511545	0.0487868	chr11	TM7SF2;TM7SF2	NM_003273;NM_003273
606	cg10552964	0.20515	0.0462354	chr6	SLC26A8;SLC26A8	NM_052961;NM_138718
607	cg10572951	-0.0379896	0.049109	chr1	KCNN3;KCNN3	NM_002249;NM_170782
608	cg10577216	0.218512	0.0430869	chr6	HIVEP2	NM_006734
609	cg10580293	0.0744697	0.0498273	chr7	PRR15	NM_175887
610	cg10599362	-0.0309735	0.0497496	chr3
611	cg10600242	-0.11376	0.0404938	chr19	OSCAR;NDUFA3;OSCAR;OSCAR;OSCAR	NM_133168;NM_004542;NM_206818;NM_130771;NM_133169
612	cg10608004	0.103205	0.0336423	chr19	RPL13AP5;RPL13A	NR_026712;NM_012423
613	cg10610788	-0.0507572	0.045203	chr2
614	cg10619129	0.110143	0.0445295	chr6	HLA-DPB2	NR_001435
615	cg10632214	0.182797	0.049109	chr1
616	cg10634619	0.133643	0.0341723	chr1	KIAA0495;KIAA0495	NM_207306;NM_207306
617	cg10637955	0.142603	0.0486489	chr2	BZW1	NM_014670
618	cg10638827	0.192432	0.0489822	chr16	MT1M	NM_176870
619	cg10662959	-0.052514	0.0469519	chr7	IGFBP1	NM_000596
620	cg10670396	0.133721	0.0485898	chrX	GPRASP1;GPRASP1;GPRASP1	NM_014710;NM_001099410;NM_001099411
621	cg10709246	0.0645707	0.0466862	chr19	PLVAP;PLVAP	NM_031310;NM_031310
622	cg10740660	-0.124653	0.0445295	chr6	C6orf27	NM_025258
623	cg10777361	0.136105	0.0447042	chr12
624	cg10779674	-0.0446683	0.0485413	chr12	SMARCC2;SMARCC2;SMARCC2	NM_003075;NM_139067;NM_001130420
625	cg10797387	-0.10628	0.027084	chr14	INF2;INF2;INF2	NM_001031714;NM_032714;NM_022489
626	cg10823086	-0.0521178	0.0407056	chr1
627	cg10833014	-0.0570668	0.0493433	chr14	WDR20;WDR20;HSP90AA1;HSP90AA1;WDR20;WDR20	NM_181291;NM_181308;NM_001017963;NM_001017963;NM_144574;NM_181302
628	cg10835172	-0.0940112	0.0478603	chr15	RCN2	NM_002902
629	cg10936999	-0.064347	0.027084	chr13	TPT1;SNORA31	NM_003295;NR_002967
630	cg10952910	-0.0235362	0.049109	chr12	SHMT2;SHMT2;SHMT2;SHMT2;SHMT2;SHMT2;SHMT2;SHMT2	NM_005412;NR_029415;NR_029417;NM_001166358;NM_001166357;NR_029416;NM_001166356;NM_001166359
631	cg10959353	0.0641662	0.0425367	chr2	SPHKAP;SPHKAP	NM_001142644;NM_030623
632	cg10991454	-0.106427	0.0357281	chr2	LCLAT1;LCLAT1	NM_001002257;NM_182551
633	cg11027221	0.174188	0.0418006	chr11	UNC93B1	NM_030930
634	cg11036643	0.325813	0.0474094	chrX	UPRT;UPRT	NR_030774;NM_145052
635	cg11039476	0.183451	0.0481656	chr2
636	cg11039614	0.0317788	0.0407056	chr5	ISL1;ISL1	NM_002202;NM_002202
637	cg11068071	-0.0745746	0.0474094	chr1	GBP2	NM_004120
638	cg11101117	0.0608961	0.0404938	chr10	FLJ41350	NR_029380
639	cg11153610	-0.0919155	0.0497496	chrX	PDZD4	NM_032512
640	cg11171719	-0.0459603	0.0472055	chr3	CTDSPL;CTDSPL;CTDSPL;CTDSPL	NM_005808;NM_001008392;NM_005808;NM_001008392
641	cg11189761	-0.0899187	0.0498946	chrX	AR	NM_000044
642	cg11190277	-0.0817439	0.027084	chr11	CCND1	NM_053056
643	cg11195797	0.0421656	0.03842	chr13	CLYBL	NM_206808
644	cg11214576	-0.0656954	0.04973	chr1	LDLRAP1	NM_015627
645	cg11236246	0.0959223	0.0457723	chrX	POU3F4	NM_000307
646	cg11244095	-0.0356523	0.0466593	chrX	GPR112	NM_153834
647	cg11249241	0.160618	0.04973	chr19	NFIX	NM_002501
648	cg11275620	-0.077803	0.0453544	chr13	POLR1D;LNX2;POLR1D	NM_015972;NM_153371;NM_152705
649	cg11298786	-0.0444668	0.0457723	chr1	WNT3A	NM_033131
650	cg11326574	-0.186539	0.0413108	chr12	LRIG3;LRIG3	NM_001136051;NM_153377
651	cg11336428	-0.0276065	0.0493433	chr17	TEX2	NM_018469
652	cg11340941	0.118973	0.0469519	chr1
653	cg11346901	-0.040604	0.045986	chr14	MIR493	NR_030172
654	cg11384014	-0.0508415	0.0407056	chr3	CLSTN2	NM_022131
655	cg11418237	0.180254	0.0496332	chrX	POU3F4	NM_000307
656	cg11419304	-0.0626344	0.0498273	chr2	ANTXR1;ANTXR1;ANTXR1	NM_053034;NM_032208;NM_018153
657	cg11437253	0.0512007	0.045203	chr3
658	cg11441894	-0.0502746	0.0469519	chr2	BCL2L11;BCL2L11;BCL2L11	NM_138621;NM_207002;NM_006538
659	cg11472424	-0.0473585	0.0498896	chrX	PFKFB1;PFKFB1	NM_002625;NM_002625
660	cg11485463	-0.0577516	0.0407056	chr6	HSPA1A;HSPA1L	NM_005345;NM_005527
661	cg11508828	0.187043	0.0401701	chr7	SSPO	NM_198455
662	cg11517728	-0.0718313	0.0394755	chr15	CYFIP1;CYFIP1;CYFIP1	NM_014608;NM_001033028;NM_001033028
663	cg11556696	-0.0550723	0.0469519	chr2	ALS2	NM_020919
664	cg11613559	0.103172	0.049109	chr10	INPP5F;INPP5F	NM_014937;NR_003252
665	cg11614195	-0.0504955	0.0474094	chr16	PGP	NM_001042371
666	cg11633264	-0.105843	0.0427277	chr8
667	cg11660725	0.0470106	0.0466862	chr10	ANKRD26	NM_014915
668	cg11668923	0.112757	0.0425367	chr10	ADAM12;ADAM12;ADAM12;ADAM12	NM_003474;NM_021641;NM_003474;NM_021641
669	cg11674735	0.147594	0.027084	chrX
670	cg11747499	0.186788	0.0478603	chr12	SSH1;SSH1	NM_018984;NM_001161330
671	cg11769382	0.0585122	0.0371547	chr17	WBP2;WBP2	NM_012478;NM_012478
672	cg11810837	0.0995982	0.0416889	chrX	ARMCX5;ARMCX5;ARMCX5;ARMCX5;ARMCX5;ARMCX5	NM_001168485;NM_022838;NM_001168478;NM_001168479;NM_001168480;NM_001168482
673	cg11835355	-0.0416016	0.0474094	chr22	APOL3;APOL3;APOL3;APOL3	NM_145641;NM_145642;NM_145641;NM_145642
674	cg11838997	-0.0809518	0.0457723	chr11	NRGN;NRGN	NM_006176;NM_001126181
675	cg11868485	-0.0253894	0.0498273	chr4	MAML3	NM_018717
676	cg11874760	-0.0305778	0.0407056	chr6	CD83;CD83	NM_004233;NM_001040280
677	cg11894100	0.131571	0.0469519	chr4	GRSF1;GRSF1	NM_002092;NM_001098477
678	cg11906997	0.179962	0.0474094	chrX	FHL1;FHL1;FHL1;FHL1;FHL1	NR_027621;NM_001449;NM_001159700;NM_001159703;NM_001159702
679	cg11917542	0.12766	0.0497496	chr6	ZBTB22;TAPBP;TAPBP;TAPBP;ZBTB22	NM_005453;NM_003190;NM_172208;NM_172209;NM_001145338
680	cg11942936	-0.11346	0.0466862	chr10
681	cg11950360	0.141576	0.0472055	chr18	BRUNOL4;BRUNOL4;BRUNOL4;BRUNOL4	NM_001025088;NM_020180;NM_001025089;NM_001025087
682	cg11967292	0.0684376	0.0399916	chr1	EPHX1	NM_001136018
683	cg11967592	0.195441	0.0425367	chr7	CREB5;CREB5;CREB5;CREB5	NM_004904;NM_182899;NM_182898;NM_001011666
684	cg11975206	-0.0665824	0.0402174	chr10	PAOX;PAOX;PAOX	NM_152911;NM_207128;NM_207127
685	cg12035880	-0.0624064	0.0404938	chr5	UBE2QL1	NM_001145161
686	cg12044213	-0.143609	0.027084	chr6	CCHCR1;TCF19;CCHCR1;TCF19;CCHCR1	NM_001105563;NM_007109;NM_001105564;NM_001077511;NM_019052
687	cg12058508	0.335215	0.027084	chrX	WDR45;WDR45	NM_001029896;NM_007075
688	cg12063580	-0.206325	0.0473504	chr14	PACS2;PACS2	NM_015197;NM_001100913
689	cg12064947	-0.0260749	0.0493989	chr15	DLL4	NM_019074
690	cg12095505	-0.0874233	0.0407056	chr12	GUCY2C;GUCY2C	NM_004963;NM_004963
691	cg12120430	-0.0630304	0.0394755	chr3	LPP;LPP	NM_001167672;NM_005578
692	cg12153593	-0.120711	0.0400532	chr19
693	cg12157788	-0.0698109	0.0355317	chr7
694	cg12163955	0.156145	0.0404938	chr15
695	cg12194828	0.165046	0.0404263	chrX	PIGA;PIGA	NM_002641;NM_020473
696	cg12210824	-0.115276	0.0488164	chrX	CT47A8;CT47A10;CT47A11;CT47A1;CT47A5;CT47A2;CT47A6;CT47A3;CT47A4;CT47A9	NM_001080139;NM_001080137;NM_173571;NM_001080146;NM_001080142;NM_001080145;NM_001080141;NM_001080144;NM_001080143;NM_001080138
697	cg12284854	-0.108216	0.0466862	chr1
698	cg12296630	-0.0239396	0.0493433	chrX	PAGE3	NM_001017931
699	cg12302912	-0.0494686	0.0401701	chr3	RAF1	NM_002880
700	cg12305074	-0.0562042	0.0478603	chr7	MAGI2	NM_012301
701	cg12331389	-0.0306828	0.0442877	chr10	RBP4	NM_006744
702	cg12344247	-0.0737966	0.0474094	chr6	FAM120B	NM_032448
703	cg12389356	-0.0302973	0.0489822	chr4	CPE	NM_001873
704	cg12390946	0.179275	0.0425367	chr10	INPP5A	NM_005539
705	cg12391279	-0.0788885	0.047604	chr10
706	cg12454229	-0.115374	0.0425367	chr13
707	cg12461568	0.079761	0.0466862	chr8	HAS2;HAS2AS	NM_005328;NR_002835
708	cg12467143	0.178078	0.0473809	chrX	ARHGAP6;ARHGAP6	NM_013427;NM_006125
709	cg12503257	-0.0678234	0.0445295	chr17	NTN1	NM_004822
710	cg12503292	0.0468322	0.0473504	chr6	MRPS18B;PPP1R10	NM_014046;NM_002714
711	cg12507655	0.0823808	0.0402174	chr7	TRIP6;TRIP6	NM_003302;NM_003302
712	cg12523109	-0.219645	0.0478603	chrX	SPANXN5	NM_001009616
713	cg12529055	-0.033144	0.0404938	chr3	ARMC8;ARMC8;ARMC8	NM_213654;NM_014154;NM_015396
714	cg12536534	0.192978	0.0407056	chrX	IKBKG;G6PD;G6PD;IKBKG;IKBKG;IKBKG	NM_001099857;NM_001042351;NM_000402;NM_003639;NM_001099856;NM_001145255
715	cg12537382	-0.0745608	0.027084	chr4
716	cg12548227	-0.0472668	0.0466862	chr7	USP42	NM_032172
717	cg12569592	-0.120048	0.0322673	chr6	ATXN1;ATXN1	NM_001128164;NM_000332
718	cg12592455	0.189807	0.0445295	chrX	FAM127A;FAM127A	NM_001078171;NM_001078171
719	cg12648193	0.0565626	0.0404938	chr1	SMYD3	NM_001167740
720	cg12656815	-0.106841	0.0498896	chr1	BCAN	NM_021948
721	cg12662576	-0.0616354	0.0474094	chr11
722	cg12667125	-0.0429819	0.0488164	chr1	C1orf216	NM_152374
723	cg12688576	0.0361076	0.0473504	chr6	RNF144B	NM_182757
724	cg12720637	0.159069	0.0336423	chrX	GABRA3;GABRA3	NM_000808;NM_000808
725	cg12728820	0.150351	0.0445295	chrX	CSTF2	NM_001325
726	cg12753303	-0.0524342	0.0474094	chr1
727	cg12768605	0.190099	0.037697	chr19	LYPD5	NM_182573
728	cg12810297	-0.066419	0.0445295	chr1
729	cg12827188	-0.0537524	0.045203	chr4	FGA;FGA	NM_000508;NM_021871
730	cg12853633	0.109845	0.047604	chr14
731	cg12860686	0.0378795	0.0466862	chr5	C5orf38	NM_178569
732	cg12861503	-0.0980155	0.0407056	chr13	NEK3;NEK3;NEK3;NEK3	NM_152720;NM_001146099;NR_027415;NM_002498
733	cg12900739	0.149391	0.0425367	chrX	RRAGB;RRAGB	NM_006064;NM_016656
734	cg12919829	-0.0655173	0.0497496	chr20	ProSAPiP1	NM_014731
735	cg12937141	-0.109705	0.0497496	chrX	MIR1256;H2BFWT	NR_031657;NM_001002916
736	cg12946371	-0.0411494	0.049109	chr11
737	cg12950441	0.109854	0.0424888	chrX	HTR2C	NM_000868
738	cg12950645	-0.127734	0.0472055	chr15
739	cg12959558	0.228101	0.0342656	chr6
740	cg12960305	-0.0618155	0.0392873	chr4	SH3BP2	NM_001122681
741	cg13052965	-0.0598902	0.027084	chr2	SIX2	NM_016932
742	cg13058819	0.281946	0.0404938	chr1	SLC35F3	NM_173508
743	cg13079429	-0.067574	0.0466862	chr11
744	cg13080565	0.087245	0.0416889	chr6	GRIK2;GRIK2;GRIK2	NM_021956;NM_001166247;NM_175768
745	cg13185177	-0.106004	0.0355317	chr3	GP5	NM_004488
746	cg13187788	-0.041215	0.049109	chr17	DLX3	NM_005220
747	cg13260333	0.035917	0.0336423	chr6	C6orf108;C6orf108	NM_199184;NM_006443
748	cg13279083	-0.0473757	0.0474094	chr4	COL25A1;COL25A1	NM_198721;NM_032518
749	cg13285458	0.0772758	0.027084	chr12	CACNB3	NM_000725
750	cg13319042	-0.0819761	0.0454439	chr5	SPARC	NM_003118
751	cg13334727	0.0570775	0.0322673	chr5	SEPT8;SEPT8;SEPT8;SEPT8	NM_001098813;NM_015146;NM_001098812;NM_001098811
752	cg13338084	0.149462	0.0404938	chrX	APLN	NM_017413
753	cg13360871	0.0862337	0.0497496	chr11	PPP1R14B	NM_138689
754	cg13364389	0.0483527	0.0474094	chr13
755	cg13391820	0.0891023	0.0466593	chr12	CCND2	NM_001759
756	cg13392029	0.181274	0.027084	chr1	ARTN;ARTN;ARTN;ARTN;ARTN	NM_057160;NM_057090;NM_001136215;NM_057091;NM_003976
757	cg13411336	0.272828	0.0447042	chr11
758	cg13427834	0.0622073	0.0407056	chr2	NCK2;NCK2	NM_003581;NM_001004722
759	cg13441872	0.184387	0.0353514	chrX	GNL3L	NM_019067
760	cg13473383	-0.0505006	0.045203	chr11	ZDHHC5	NM_015457
761	cg13491644	-0.0516577	0.049109	chr10	NEURL	NM_004210
762	cg13492223	-0.102233	0.0466862	chr19	FUT6;FUT6	NM_001040701;NM_000150
763	cg13494428	-0.0746562	0.0457723	chr1	AKR7A2;PQLC2;PQLC2;PQLC2	NM_003689;NM_001040126;NM_001040125;NM_017765
764	cg13500074	0.155102	0.0445295	chr2	BCL11A;BCL11A;BCL11A	NM_018014;NM_138559;NM_022893
765	cg13506244	-0.0558909	0.0498946	chrX	LOC92249	NR_015353
766	cg13531837	-0.0677037	0.0486489	chr6
767	cg13563074	-0.177738	0.0466862	chr11	OVCH2	NM_198185
768	cg13573761	-0.0311164	0.0457723	chr4	C4orf23	NM_152544
769	cg13614617	-0.0253406	0.0485617	chr15	IGDCC3	NM_004884
770	cg13622546	-0.112126	0.0479258	chr9	ASB6;ASB6	NM_177999;NM_017873
771	cg13632816	0.0494354	0.0474094	chr9	SVEP1;SVEP1	NM_153366;NM_153366
772	cg13645530	-0.0385608	0.0407056	chr12
773	cg13669080	0.0925544	0.0401701	chr9	AGPAT2;AGPAT2	NM_006412;NM_001012727
774	cg13674559	0.148952	0.0469519	chrX	WDR44	NM_019045
775	cg13691247	0.0593086	0.040692	chr12	ATP5G2;ATP5G2	NM_005176;NM_001002031
776	cg13701355	-0.0309358	0.0406617	chr9	COL5A1	NM_000093
777	cg13718418	0.0441098	0.0498273	chr12
778	cg13728797	-0.173896	0.0447042	chr8
779	cg13749508	-0.0516275	0.0466862	chrX	CFP;CFP	NM_001145252;NM_002621
780	cg13770865	-0.0584967	0.049109	chr10	SGPL1	NM_003901
781	cg13781158	-0.0735225	0.0407056	chr11	CNIH2	NM_182553
782	cg13806267	-0.100661	0.0427277	chr11
783	cg13809962	0.105207	0.0394755	chrX	ZNF711	NM_021998
784	cg13812570	-0.154285	0.0488164	chrX	SPANXN1	NM_001009614
785	cg13826636	0.0533589	0.0421462	chr17	ACTG1;ACTG1	NM_001614;NM_001614
786	cg13860527	0.0684025	0.0488164	chr1	IGSF8	NM_052868
787	cg13874425	0.191701	0.0474094	chr9
788	cg13887933	-0.0222363	0.0466862	chr9	PAX5	NM_016734
789	cg13889750	-0.0326913	0.0473504	chr10
790	cg13910573	-0.0357824	0.0474094	chr9	ALAD	NM_000031
791	cg13915676	-0.047436	0.0478603	chr9	SDCCAG3;SDCCAG3;PMPCA;SDCCAG3	NM_001039707;NM_001039708;NM_015160;NM_006643
792	cg13936061	-0.03113	0.0394755	chr7	MAD1L1;MAD1L1;MAD1L1	NM_003550;NM_001013837;NM_001013836
793	cg13962347	0.143792	0.0425367	chr6	LYRM4;LYRM4	NM_001164841;NM_020408
794	cg13972676	0.0765406	0.0474094	chr2	SPATS2L;SPATS2L;SPATS2L;SPATS2L;SPATS2L;SPATS2L	NM_015535;NM_001100424;NM_001100422;NM_001100424;NM_001100423;NM_001100422
795	cg13978352	-0.163767	0.0404938	chr6	DPCR1	NM_080870
796	cg13986294	0.214497	0.0478603	chr9
797	cg14002274	0.154278	0.0342656	chr6	RPF2	NM_032194
798	cg14008593	0.230613	0.0472055	chr1	TTLL10;TTLL10	NM_153254;NM_001130045
799	cg14012686	-0.0622169	0.0466862	chr2	C2orf65	NM_138804
800	cg14014604	-0.0377026	0.0473504	chr2	GPR155;GPR155	NM_152529;NM_001033045
801	cg14016177	0.202429	0.042613	chr9
802	cg14017444	0.108749	0.0447042	chr4
803	cg14032218	-0.0466698	0.0498273	chr1	METTL13;METTL13;METTL13	NM_015935;NM_014955;NM_001007239
804	cg14064356	0.0883836	0.049109	chr2	CCDC140	NM_153038
805	cg14066471	0.139463	0.0466862	chr17	RAB37	NM_175738
806	cg14077965	0.0594031	0.0491005	chr14	FERMT2;FERMT2;FERMT2	NM_001134999;NM_001135000;NM_006832
807	cg14110884	0.301883	0.0472055	chrX
808	cg14120215	-0.233469	0.0474094	chr12	SDS;SDS	NM_006843;NM_006843
809	cg14149172	-0.0928772	0.027084	chr1	PI4KB	NM_002651
810	cg14177925	-0.178374	0.0425367	chr14
811	cg14190674	0.0981867	0.0336423	chr2	FN1;FN1;FN1;FN1;FN1;FN1;FN1;FN1;FN1;FN1;FN1;FN1;FN1;FN1	NM_212474;NM_212476;NM_002026;NM_212482;NM_212475;NM_002026;NM_212475;NM_212474;NM_054034;NM_212476;NM_054034;NM_212478;NM_212482;NM_212478
812	cg14191292	0.0656724	0.0445295	chrX	CTPS2;CTPS2;CTPS2	NM_001144002;NM_175859;NM_019857
813	cg14204735	0.0515158	0.0448473	chr17	CYB561;CYB561	NM_001915;NM_001017916
814	cg14205016	0.189235	0.0457723	chr11
815	cg14219019	-0.0937009	0.0466862	chr6	BTN2A3	NR_027795
816	cg14288848	0.261127	0.0471023	chr6	ZBTB22;TAPBP;TAPBP;TAPBP;ZBTB22	NM_005453;NM_003190;NM_172208;NM_172209;NM_001145338
817	cg14289469	0.067412	0.0478603	chr14
818	cg14354327	0.0689165	0.0447042	chr10
819	cg14354472	-0.0466506	0.0471023	chr9	NTNG2	NM_032536
820	cg14369117	-0.0368891	0.0488164	chr17	HRNBP3	NM_001082575
821	cg14377923	-0.0394743	0.0457723	chr14	MTA1	NM_004689
822	cg14397289	0.180896	0.0394755	chrX	IKBKG;IKBKG;IKBKG;G6PD;IKBKG;G6PD;IKBKG;IKBKG	NM_001145255;NM_001145255;NM_001099857;NM_001042351;NM_001099857;NM_000402;NM_003639;NM_001099856
823	cg14403099	-0.0292305	0.0472296	chrX
824	cg14437002	0.116349	0.0498896	chr9
825	cg14441271	0.322667	0.045203	chr6	VIP;VIP	NM_003381;NM_194435
826	cg14455366	0.0850968	0.0488164	chr9	NFIB	NM_005596
827	cg14470121	-0.0617267	0.0457723	chr16	IFT140;TMEM204	NM_014714;NM_024600
828	cg14520770	-0.0550395	0.0442877	chr22	GNB1L;C22orf29	NM_053004;NM_024627
829	cg14526997	-0.0892338	0.0497496	chr9	EHMT1;EHMT1	NM_024757;NM_001145527
830	cg14533133	0.230878	0.0474094	chrX	SLITRK2;SLITRK2;SLITRK2;SLITRK2;SLITRK2;SLITRK2;SLITRK2;SLITRK2;SLITRK2	NM_001144009;NM_001144010;NM_001144008;NM_001144006;NM_001144003;NM_032539;NM_001144005;NM_001144007;NM_001144004
831	cg14554170	-0.0582454	0.0355317	chr11	ILK;ILK;ILK;ILK;RRP8	NM_001014794;NM_001014795;NM_001014795;NM_004517;NM_015324
832	cg14562990	0.127466	0.0472055	chrX	LDOC1	NM_012317
833	cg14563732	-0.0550014	0.0447042	chr8	TSNARE1	NM_145003
834	cg14568384	-0.122432	0.0425367	chr10	TMEM180	NM_024789
835	cg14570389	0.160997	0.0466862	chrX	RAP2C	NM_021183
836	cg14570838	0.103256	0.045203	chr11	FLI1;FLI1	NM_002017;NM_001167681
837	cg14578009	0.257008	0.035974	chr5
838	cg14598198	0.0461893	0.0457723	chr11	CDKN1C;CDKN1C;CDKN1C	NM_000076;NM_001122630;NM_001122631
839	cg14608156	0.0586248	0.0336423	chr11	INS-IGF2;IGF2AS;IGF2;IGF2;IGF2AS;IGF2	NR_003512;NR_028044;NM_001127598;NM_001007139;NR_028043;NM_000612
840	cg14630748	-0.0704332	0.0466862	chr6	TNXB;TNXB	NM_019105;NM_032470
841	cg14631386	0.0533241	0.0425367	chr8
842	cg14644166	0.0373347	0.0469519	chr3	ALCAM	NM_001627
843	cg14653643	0.0751688	0.0474094	chr6	LCA5;LCA5	NM_181714;NM_001122769
844	cg14661383	-0.0717649	0.0498896	chr1	OBSCN;OBSCN	NM_052843;NM_001098623
845	cg14684434	-0.0347911	0.0436026	chr5	SNX18;SNX18	NM_001145427;NM_001102575
846	cg14719055	0.172389	0.0425367	chrX	RBBP7	NM_002893
847	cg14732324	0.0604332	0.0407056	chr5
848	cg14745824	-0.0791455	0.0407056	chrX	EDA;EDA;EDA;EDA;EDA	NM_001005612;NM_001399;NM_001005609;NM_001005615;NM_001005610
849	cg14814815	-0.0321768	0.045203	chrX	CTPS2;CTPS2	NM_019857;NM_175859
850	cg14835981	-0.140395	0.0457723	chr7	PRKAR1B;PRKAR1B;PRKAR1B;PRKAR1B;PRKAR1B;PRKAR1B;PRKAR1B	NM_001164762;NM_001164760;NM_001164761;NM_002735;NM_001164761;NM_001164759;NM_001164758
851	cg14861298	-0.128364	0.0498896	chr5	SDHA	NM_004168
852	cg14865034	-0.0319289	0.0469519	chr17
853	cg14867085	0.309778	0.0457723	chr11
854	cg14915165	-0.0692665	0.0489969	chr1	WDR3;GDAP2;GDAP2	NM_006784;NM_017686;NM_001135589
855	cg14930000	-0.0884849	0.049109	chrX
856	cg14964387	0.138417	0.0447042	chrX	WDR45	NM_007075
857	cg14989243	0.324353	0.0322673	chr6	FILIP1	NM_015687
858	cg14993186	0.111202	0.0473504	chrX	RPS6KA6	NM_014496
859	cg15012484	0.0896862	0.0407056	chr6
860	cg15025240	-0.1366	0.0486489	chr2	C2orf65	NM_138804
861	cg15029285	0.146023	0.0457723	chrX	CXorf36;CXorf36	NM_176819;NM_024689
862	cg15070283	-0.0293499	0.0488164	chr17	RAP1GAP2;RAP1GAP2	NM_015085;NM_001100398
863	cg15085044	-0.076971	0.0466862	chr17
864	cg15089950	-0.141419	0.0497496	chr7	STEAP1	NM_012449
865	cg15101633	0.0478583	0.0469519	chr14	MEG3;MEG3;MEG3	NR_003531;NR_003530;NR_002766
866	cg15114107	-0.0605267	0.027084	chr1	GUK1;GUK1	NM_001159390;NM_000858
867	cg15126975	0.0464355	0.0474094	chr2
868	cg15133344	0.165135	0.0471023	chrX	BCOR;BCOR	NM_001123384;NM_001123383
869	cg15148394	-0.0721938	0.037697	chr19
870	cg15162320	-0.0300509	0.0481656	chr4
871	cg15166246	0.0526604	0.0478603	chr2
872	cg15190445	0.128479	0.0447042	chr6
873	cg15195412	-0.09963	0.0447042	chr16	CX3CL1	NM_002996
874	cg15228928	-0.0603672	0.047604	chr13
875	cg15250797	0.11418	0.0474094	chr2	SCTR	NM_002980
876	cg15275309	0.140956	0.0330297	chr2
877	cg15280185	-0.0848821	0.0488164	chr10
878	cg15302296	-0.0572727	0.0336423	chr8	TNFRSF10C	NM_003841
879	cg15309236	0.23164	0.0498273	chrX	BHLHB9;BHLHB9;BHLHB9;BHLHB9;BHLHB9;BHLHB9	NM_001142526;NM_030639;NM_001142524;NM_001142527;NM_001142525;NM_001142528
880	cg15336560	0.151118	0.0260798	chrX	HDX	NM_144657
881	cg15375586	0.176223	0.0407056	chrX	TBX22;TBX22;TBX22	NM_001109878;NM_001109879;NM_016954
882	cg15375883	-0.0589534	0.0440718	chr11	ST3GAL4	NM_006278
883	cg15444076	0.070118	0.0472055	chr6	NDUFAF4	NM_014165
884	cg15481878	-0.0586541	0.0336423	chrX	PAGE2	NM_207339
885	cg15492466	-0.0325273	0.0498896	chr1	RERE;RERE;RERE	NM_012102;NM_001042682;NM_001042681
886	cg15494556	0.0814914	0.0425367	chr20	ZBP1;ZBP1;ZBP1;ZBP1	NM_030776;NM_001160419;NM_001160417;NM_001160418
887	cg15524063	0.0485688	0.0322673	chr1	ELOVL1	NM_022821
888	cg15525848	0.173194	0.0466862	chr5	FAM134B;FAM134B	NM_001034850;NM_019000
889	cg15618210	-0.0632159	0.0473504	chr11	OPCML	NM_001012393
890	cg15632325	-0.0444005	0.0407056	chr1	TMCO1;TMCO1	NM_019026;NM_019026
891	cg15647725	-0.0830666	0.0447042	chr5	SLC12A7	NM_006598
892	cg15674432	0.0407391	0.0407056	chr6	SLC26A8;SLC26A8	NM_052961;NM_138718
893	cg15682807	0.148126	0.0474094	chrX	ITM2A;ITM2A	NM_004867;NM_001171581
894	cg15701210	-0.0350998	0.0457723	chr19	LILRA1	NM_006863
895	cg15712226	0.161517	0.0401701	chr12	SNRPF	NM_003095
896	cg15716373	0.0924318	0.040692	chr22	APOL1;APOL1;APOL1;APOL1	NM_145343;NM_001136540;NM_003661;NM_001136541
897	cg15756407	-0.141066	0.0357288	chr11	TIMM8B;SDHD;TIMM8B	NM_012459;NM_003002;NR_028383
898	cg15765801	-0.0957597	0.0497496	chrX
899	cg15772157	0.216637	0.0394755	chr10
900	cg15813836	0.16307	0.0478603	chrX	GPR64;GPR64;GPR64;GPR64	NM_005756;NM_001079859;NM_001079860;NM_001079858
901	cg15825536	-0.0363924	0.0479791	chr15	RPUSD2	NM_152260
902	cg15838301	-0.0427729	0.0425367	chr4	SORCS2	NM_020777
903	cg15840985	0.219943	0.0466862	chr3	ZNF860;OSBPL10	NM_001137674;NM_017784
904	cg15847565	-0.0510672	0.0457723	chr4	C4orf36;C4orf36	NM_144645;NM_144645
905	cg15870894	-0.0735318	0.0421462	chrX
906	cg15975282	-0.0290692	0.0447042	chr3	RPL22L1	NM_001099645
907	cg15976709	-0.04879	0.0447042	chr19	PRDX2;PRDX2	NM_181738;NM_005809
908	cg16015205	-0.0728878	0.0342656	chr1	SH3BGRL3	NM_031286
909	cg16016431	-0.0394708	0.0466862	chr11	PHRF1	NM_020901
910	cg16024729	-0.0460579	0.0417356	chr17
911	cg16036142	0.091751	0.0474094	chr11	ARRB1;ARRB1	NM_020251;NM_004041
912	cg16068020	0.16198	0.0447042	chrX	TMSB15A	NM_021992
913	cg16084857	0.162392	0.027084	chrX	FLJ30058	NM_144967
914	cg16107992	0.206837	0.0445295	chrX	HDX	NM_144657
915	cg16125874	0.145302	0.0404938	chr14	CLEC14A;CLEC14A	NM_175060;NM_175060
916	cg16166826	-0.0725701	0.044448	chr6	HCG26	NR_002812
917	cg16176048	-0.0711566	0.0466862	chr22	MAPK12;MAPK12	NM_002969;NM_002969
918	cg16203801	0.0544787	0.0336423	chr6	LOC285830;LOC285830	NR_026972;NR_026973
919	cg16210842	0.195874	0.0260798	chr5
920	cg16220124	0.0742499	0.0447042	chr4	LOC285548	NR_015450
921	cg16238207	-0.0744087	0.0430869	chr2	PDCL3	NM_024065
922	cg16273175	-0.067119	0.0336423	chr6
923	cg16276063	0.0768883	0.0395046	chr3	SOX2OT	NR_004053
924	cg16291276	0.102871	0.0488164	chr1	CD34;CD34	NM_001025109;NM_001773
925	cg16294641	-0.0534722	0.0322673	chr1
926	cg16359563	0.0988679	0.0468061	chrX	ZC4H2	NM_018684
927	cg16399300	0.0307657	0.0474094	chr1	PDE4B;PDE4B;PDE4B	NM_001037341;NM_001037340;NM_002600
928	cg16419686	-0.108673	0.0481656	chr13
929	cg16426291	-0.0985259	0.0472055	chrX	HDAC8;HDAC8;HDAC8;HDAC8;HDAC8;HDAC8	NM_018486;NM_001166419;NM_001166422;NM_001166420;NM_001166448;NM_001166418
930	cg16448890	0.160171	0.0406617	chr3	CAV3;CAV3	NM_001234;NM_033337
931	cg16457027	-0.0422008	0.0478603	chr3	ARPC4;ARPC4;ARPC4;ARPC4;TADA3;TADA3	NM_001024959;NM_005718;NM_005718;NM_001024960;NM_133480;NM_006354
932	cg16460699	-0.0462697	0.0472055	chr3	DHX36;DHX36	NM_001114397;NM_020865
933	cg16476432	-0.0390269	0.0407056	chr7	GCK	NM_000162
934	cg16483867	0.114678	0.0473274	chr22	ZNRF3	NM_032173
935	cg16484042	-0.173012	0.0497496	chr16
936	cg16518614	-0.0516566	0.0445295	chr7
937	cg16558695	-0.085699	0.0445295	chr10
938	cg16574134	0.0563714	0.0447042	chr10	PAX2;PAX2;PAX2;PAX2;PAX2	NM_003988;NM_000278;NM_003990;NM_003989;NM_003987
939	cg16576300	-0.0963448	0.0474094	chrX	ZC4H2	NM_018684
940	cg16594502	-0.0935878	0.0466862	chr15
941	cg16613750	0.195996	0.0466593	chrX	MSN;MSN	NM_002444;NM_002444
942	cg16625651	0.099736	0.0402174	chrX	PIR;PIR	NM_003662;NM_001018109
943	cg16637224	-0.0971366	0.0401701	chr2
944	cg16744862	-0.0821286	0.0497496	chr16	MRPS34;NME3;EME2	NM_023936;NM_002513;NM_001010865
945	cg16801265	0.163571	0.0481656	chrX	IL1RAPL2	NM_017416
946	cg16829450	0.124029	0.0472055	chr12	NTN4	NM_021229
947	cg16840743	0.350511	0.0336423	chrX	THOC2	NM_001081550
948	cg16869809	-0.0433873	0.040692	chrX	ARL13A;ARL13A;ARL13A	NM_001012990;NM_001162491;NM_001162490
949	cg16900255	0.257729	0.0478603	chr15	C15orf59	NM_001039614
950	cg16908830	-0.0696436	0.0474094	chr7	ZNRF2	NM_147128
951	cg16918989	-0.0401482	0.0492308	chr17	PIK3R5	NM_001142633
952	cg16926389	0.0500778	0.0346483	chr17	CCDC46	NM_145036
953	cg16937327	-0.0258562	0.0496332	chrX	MAGEA8;MAGEA8;MAGEA8;MAGEA8;MAGEA8;MAGEA8	NM_001166400;NM_005364;NM_001166401;NM_001166401;NM_001166400;NM_005364
954	cg16944093	0.0600929	0.0466862	chr2	LIMS2;LIMS2;LIMS2;LIMS2;LIMS2	NM_001136037;NM_017980;NM_001161403;NM_017980;NM_001161404
955	cg16956903	0.137735	0.027084	chrX	LOC92249	NR_015353
956	cg16968020	-0.162461	0.0346483	chrX	GABRA3	NM_000808
957	cg16971668	0.207827	0.0481764	chr3	EOMES	NM_005442
958	cg16985113	-0.0676166	0.0406234	chr11	CFL1;CFL1	NM_005507;NM_005507
959	cg17014035	-0.0794706	0.0355317	chr6	MCART3P	NR_026540
960	cg17055704	0.235453	0.033102	chr6	ZBTB22;TAPBP;TAPBP;TAPBP;ZBTB22	NM_005453;NM_003190;NM_172208;NM_172209;NM_001145338
961	cg17059853	0.0676426	0.0472055	chr11	NRXN2;NRXN2	NM_015080;NM_138732
962	cg17080902	-0.024754	0.0457723	chr15	DMXL2	NM_015263
963	cg17142722	0.0912726	0.0445295	chr1
964	cg17168235	-0.0495521	0.0407056	chr10
965	cg17183174	0.193603	0.0401701	chr13
966	cg17189778	0.239011	0.0273092	chrX	AVPR2;AVPR2;AVPR2	NM_000054;NM_001146151;NR_027419
967	cg17205928	-0.0917677	0.0457723	chr13	FAM123A;FAM123A	NM_152704;NM_199138
968	cg17237086	0.188342	0.0421681	chr22	MKL1	NM_020831
969	cg17288288	0.177482	0.0357281	chr13	DLEU7	NM_198989
970	cg17355765	0.108813	0.0466862	chrX	HS6ST2;HS6ST2	NM_147175;NM_001077188
971	cg17374002	0.040501	0.0336423	chr11	UVRAG	NM_003369
972	cg17391107	0.188855	0.0457723	chrX	EBP	NM_006579
973	cg17415555	-0.0572622	0.0461649	chr12	TMTC2	NM_152588
974	cg17455261	0.0456213	0.0469519	chr4	AFF1	NM_001166693
975	cg17464366	0.271182	0.0401701	chrX	ZC4H2	NM_018684
976	cg17497824	-0.0474258	0.0407056	chr1	PRKCZ;PRKCZ	NM_002744;NM_001033581
977	cg17509494	0.227833	0.0442877	chrX	ZDHHC15;ZDHHC15;ZDHHC15	NM_144969;NM_001146257;NM_001146256
978	cg17526483	0.0691539	0.0447042	chr7	EVX1	NM_001989
979	cg17528967	0.0459591	0.0466593	chr17	PYY	NM_004160
980	cg17529435	0.119656	0.0445295	chrX
981	cg17550708	-0.0271457	0.0471023	chr5
982	cg17560015	-0.0559424	0.0404938	chr8	PLEC1;PLEC1;PLEC1;PLEC1;PLEC1;PLEC1;PLEC1;PLEC1	NM_201378;NM_201384;NM_201382;NM_201381;NM_000445;NM_201380;NM_201383;NM_201379
983	cg17588373	0.133081	0.0417968	chrX	GPM6B	NM_001001994
984	cg17600233	-0.0873829	0.0497496	chr5	IL3	NM_000588
985	cg17615115	-0.0878272	0.0342656	chr17
986	cg17627526	0.116157	0.0497496	chrX	PCYT1B;PCYT1B;PCYT1B	NM_004845;NM_001163264;NM_001163265
987	cg17646273	-0.0612822	0.045203	chr17	MLX;MLX;MLX	NM_170607;NM_198204;NM_198205
988	cg17654284	-0.102138	0.0445295	chrX
989	cg17688525	0.0798534	0.0407056	chr18	L3MBTL4	NM_173464
990	cg17695543	-0.0694476	0.0447042	chr19	ANGPTL4;ANGPTL4	NM_001039667;NM_139314
991	cg17731710	-0.128122	0.027084	chr10
992	cg17744604	0.365703	0.0404938	chr1	IL10	NM_000572
993	cg17786844	-0.0680781	0.0447042	chr1	PTP4A2;PTP4A2	NM_080392;NM_080391
994	cg17792806	-0.204362	0.0478603	chrX	TCEAL7	NM_152278
995	cg17910586	-0.0396288	0.0322673	chr3	SEMA3G	NM_020163
996	cg17920653	0.0826871	0.0466862	chr2	TUBA4A	NM_006000
997	cg17921331	0.0445222	0.0336423	chr8	C8ORFK29	NR_015428
998	cg17943663	-0.16649	0.0404938	chr17	CDK3	NM_001258
999	cg17964359	0.162991	0.0355317	chrX	AR	NM_000044
1000	cg17991347	0.148327	0.0380156	chrX	MAGED1	NM_001005332
1001	cg18005219	0.219065	0.0457723	chrX	PTCHD1	NM_173495
1002	cg18007959	0.089326	0.0413108	chr5
1003	cg18041840	-0.0666217	0.0478603	chr11	SIPA1	NM_006747
1004	cg18054674	0.208922	0.0457723	chr5	PCDHGA4;PCDHGA1;PCDHGA6;PCDHGA5;PCDHGB1;PCDHGA3;PCDHGA2;PCDHGA6;PCDHGB2;PCDHGB3	NM_018917;NM_018912;NM_032086;NM_018918;NM_018922;NM_018916;NM_018915;NM_018919;NM_018923;NM_018924
1005	cg18072802	-0.0612833	0.049109	chr4	GSX2;GSX2	NM_133267;NM_133267
1006	cg18143296	0.0426865	0.0457723	chr3
1007	cg18144073	0.17757	0.0457723	chrX	MAGED2;MAGED2;MAGED2	NM_177433;NM_201222;NM_014599
1008	cg18204964	-0.154217	0.0407056	chr5	LIFR;LIFR	NM_001127671;NM_002310
1009	cg18219432	-0.0262942	0.0461266	chr7	PTPRN2;PTPRN2;PTPRN2	NM_002847;NM_130842;NM_130843
1010	cg18229521	0.0588606	0.0401701	chr14	SLC24A4;SLC24A4;SLC24A4	NM_153647;NM_153648;NM_153646
1011	cg18238734	-0.0569009	0.0474094	chr12	ITPR2;ITPR2	NM_002223;NM_002223
1012	cg18303175	-0.0444356	0.0457723	chr19	ZBTB7A	NM_015898
1013	cg18369325	-0.0835001	0.0474094	chr14	RAD51L1;RAD51L1;RAD51L1	NM_133509;NM_002877;NM_133510
1014	cg18389752	0.132294	0.0474041	chrX	AMOT	NM_133265
1015	cg18395615	0.120008	0.049109	chrX	ESX1	NM_153448
1016	cg18403361	0.0849091	0.027084	chr14	CLEC14A	NM_175060
1017	cg18419271	0.184177	0.0380156	chr6
1018	cg18432711	0.143996	0.0407056	chrX	RBMX;RBMX;RBMX;RBMX;SNORD61	NM_001164803;NR_028477;NM_002139;NR_028476;NR_002735
1019	cg18434680	-0.100533	0.049109	chrX	GLRA4;GLRA4	NM_001024452;NM_001024452
1020	cg18447299	0.0504437	0.0466862	chr5	DIAPH1;DIAPH1	NM_005219;NM_001079812
1021	cg18460175	0.159633	0.0472333	chr19	ETV2	NM_014209
1022	cg18478786	0.123167	0.0474094	chrX	SLC25A5;LOC100303728	NM_001152;NR_028443
1023	cg18506744	-0.128323	0.0469519	chr19	GPX4;GPX4	NM_002085;NM_001039847
1024	cg18530324	0.0866663	0.0488164	chr18	KIAA0427;KIAA0427	NM_001142397;NM_014772
1025	cg18535534	0.273106	0.0474094	chrX	BCORL1	NM_021946
1026	cg18537222	0.18396	0.0425367	chr3	PPARG;PPARG;PPARG;PPARG	NM_015869;NM_005037;NM_138712;NM_138711
1027	cg18564458	-0.0897307	0.0457723	chr10	CYP2C19	NM_000769
1028	cg18591441	-0.0493438	0.0312396	chr10	CCDC109A	NM_138357
1029	cg18606378	0.0246864	0.0406698	chr6	RAB23;RAB23	NM_183227;NM_016277
1030	cg18671984	-0.0316013	0.0425367	chr19	TUBB4;MIR220B	NM_006087;NR_030585
1031	cg18700197	-0.05588	0.0499981	chrX	ZC3H12B	NM_001010888
1032	cg18705916	0.0684488	0.027084	chr5	MRPL36;NDUFS6	NM_032479;NM_004553
1033	cg18718844	0.129918	0.0472055	chr8	ESCO2	NM_001017420
1034	cg18727102	0.168199	0.027084	chr6
1035	cg18743730	0.16513	0.0466593	chr17	CA4	NM_000717
1036	cg18758796	0.0419127	0.027084	chr5	PDLIM4;PDLIM4;PDLIM4;PDLIM4	NM_001131027;NM_003687;NM_001131027;NM_003687
1037	cg18769103	-0.0326112	0.0425367	chr1	ERO1LB	NM_019891
1038	cg18773223	-0.0687464	0.0445295	chr9	TBC1D13;TBC1D13	NM_018201;NM_018201
1039	cg18778986	0.130879	0.0457723	chrX	TMLHE	NM_018196
1040	cg18780401	0.156451	0.0466862	chrX	OTUD5;OTUD5;OTUD5;OTUD5	NM_017602;NM_001136159;NM_001136158;NM_001136157
1041	cg18790852	-0.0237531	0.049109	chr7	LMTK2	NM_014916
1042	cg18811184	-0.0427871	0.0473274	chrX	PPEF1;PPEF1;PPEF1	NM_152226;NM_152224;NM_006240
1043	cg18823849	-0.0305401	0.0475661	chr8
1044	cg18831604	-0.0547696	0.0401701	chr19
1045	cg18846140	-0.0819212	0.0421681	chr6	HSPA1A;HSPA1L	NM_005345;NM_005527
1046	cg18869368	0.178995	0.0498896	chrX	MAGEH1	NM_014061
1047	cg18926062	0.0562513	0.0392873	chr15
1048	cg18934106	0.0553429	0.0404938	chr6	DAXX;DAXX;DAXX;DAXX	NM_001141969;NR_024517;NM_001350;NM_001141970
1049	cg18999476	-0.0761272	0.0450018	chrX
1050	cg19011478	0.275363	0.0466862	chrX	ARX	NM_139058
1051	cg19015086	-0.143082	0.0498273	chr22	SEC14L2	NM_012429
1052	cg19016664	-0.0866717	0.0401701	chr17
1053	cg19020398	-0.185329	0.0488164	chr5	NIPAL4	NM_001099287
1054	cg19046697	0.14291	0.0466862	chr5	FLJ42709;FLJ42709	NR_021490;NR_021491
1055	cg19085118	0.155503	0.0425367	chr22	C22orf39;C22orf39	NM_173793;NM_001166242
1056	cg19092293	0.158039	0.0211516	chrX	LONRF3;LONRF3	NM_001031855;NM_024778
1057	cg19093820	-0.103247	0.0481656	chr3	GPR156;GPR156	NM_153002;NM_001168271
1058	cg19164987	0.175919	0.0413108	chr12	HOXC4;HOXC5;HOXC6	NM_014620;NR_003084;NM_153693
1059	cg19167034	-0.137422	0.045203	chr1	WARS2;WARS2	NM_201263;NM_015836
1060	cg19184963	-0.111037	0.0466862	chr22	MAPK11	NM_002751
1061	cg19188297	-0.0449347	0.0447042	chr12
1062	cg19206010	0.176912	0.0466862	chrX	LOC100133957;UXT;LOC100133957;UXT	NR_028119;NM_004182;NR_027444;NM_153477
1063	cg19212948	0.0446879	0.0407056	chr16	RBBP6;RBBP6;RBBP6;RBBP6;RBBP6;RBBP6	NM_018703;NM_032626;NM_006910;NM_006910;NM_018703;NM_032626
1064	cg19223616	0.0276332	0.0472055	chrX	CLCN5;CLCN5;CLCN5	NM_001127898;NM_001127899;NM_000084
1065	cg19238349	-0.0568842	0.0425367	chr13	CAB39L;CAB39L	NM_001079670;NM_030925
1066	cg19257537	0.208776	0.0466862	chrX	ZNF673;ZNF673;ZNF673;ZNF673;ZNF673;ZNF673;ZNF673;ZNF673	NM_001129899;NM_017776;NM_001129899;NM_017776;NM_001129898;NM_001129900;NM_001129900;NM_001129898
1067	cg19265300	-0.164395	0.0451909	chr15
1068	cg19274341	0.146288	0.0466862	chr1
1069	cg19274612	-0.0294433	0.0478551	chr1
1070	cg19300422	-0.165252	0.0474094	chr17	TRPV3	NM_145068
1071	cg19303865	-0.0308979	0.0474094	chr2	TRAF3IP1;TRAF3IP1	NM_015650;NM_001139490
1072	cg19334385	0.173076	0.0336423	chrX	DOCK11	NM_144658
1073	cg19355555	0.212229	0.0473504	chrX	LRCH2	NM_020871
1074	cg19358493	0.0590959	0.0497496	chr10	EMX2;EMX2OS;EMX2	NM_001165924;NR_002791;NM_004098
1075	cg19401970	0.038685	0.043183	chrX	IQSEC2	NM_001111125
1076	cg19425242	0.0427498	0.0336423	chrX	CXorf15;CXorf15	NM_001168683;NM_018360
1077	cg19458529	-0.140443	0.0490264	chr5	MAST4;MAST4	NM_015183;NM_001164664
1078	cg19461344	-0.0578043	0.0491005	chr2	SLC30A3;SLC30A3	NM_003459;NM_003459
1079	cg19476053	0.0611431	0.045203	chr2	CCDC140	NM_153038
1080	cg19481013	0.167921	0.0471537	chrX
1081	cg19504184	-0.252701	0.0384963	chr17
1082	cg19512268	0.138822	0.0380156	chr6	GRM1;GRM1;GRM1;GRM1	NM_001114329;NM_001114329;NM_000838;NM_000838
1083	cg19578183	-0.0691479	0.0407056	chr2
1084	cg19585278	-0.0882203	0.0460376	chrX	GLRA4;GLRA4	NM_001024452;NM_001024452
1085	cg19593401	-0.172949	0.0471023	chr3	CCDC80;CCDC80	NM_199512;NM_199511
1086	cg19618505	-0.0707167	0.0404938	chrX
1087	cg19619014	0.13979	0.0466862	chr8
1088	cg19619576	-0.074345	0.0466862	chr17	MIR33B;SREBF1;SREBF1	NR_030361;NM_004176;NM_001005291
1089	cg19629755	0.1504	0.0447042	chrX	IGBP1	NM_001551
1090	cg19632574	0.135098	0.0466862	chr1	PAFAH2	NM_000437
1091	cg19639792	-0.0722279	0.0425367	chrX	RGN;RGN	NM_004683;NM_152869
1092	cg19646165	0.0955301	0.0469519	chr17	GABARAP	NM_007278
1093	cg19661819	0.137433	0.0422481	chr7	NUB1	NM_016118
1094	cg19666053	0.169335	0.0472055	chrX
1095	cg19670870	0.0438386	0.0397843	chr6	C6orf141;C6orf141	NM_001145652;NM_001145652
1096	cg19682684	-0.0396528	0.0472932	chr1
1097	cg19722720	-0.0443779	0.0401701	chr1	WNT2B;WNT2B	NM_004185;NM_024494
1098	cg19740287	0.140129	0.0472055	chrX	FANCB;MOSPD2;FANCB	NM_001018113;NM_152581;NM_152633
1099	cg19741273	0.11397	0.049109	chr14	C14orf70	NR_024096
1100	cg19756547	0.0827752	0.045203	chr4
1101	cg19767800	0.0917802	0.044264	chr5	FLJ42709;FLJ42709	NR_021490;NR_021491
1102	cg19780684	0.172168	0.027084	chrX	ASB9;ASB9;ASB9;ASB9;ASB9;ASB9;ASB9	NM_001168530;NM_001168531;NM_024087;NM_001168530;NM_001031739;NM_024087;NM_001031739
1103	cg19795235	-0.0540862	0.0401701	chr10	MYO3A	NM_017433
1104	cg19811118	-0.119744	0.0374992	chr20	PKIG;PKIG;PKIG	NM_181805;NM_181804;NM_007066
1105	cg19854896	0.188374	0.0394755	chrX	TSC22D3;TSC22D3;TSC22D3	NM_004089;NM_001015881;NM_198057
1106	cg19864060	-0.183787	0.0468061	chr1
1107	cg19881386	0.105488	0.0445295	chrX	NR0B1	NM_000475
1108	cg19975933	0.0610382	0.0454439	chr11	P4HA3	NM_182904
1109	cg20036711	-0.0598868	0.0466862	chr13	LATS2	NM_014572
1110	cg20051949	-0.0422074	0.0469519	chr11	KIRREL3;KIRREL3	NM_001161707;NM_032531
1111	cg20065832	0.179173	0.045203	chrX	POU3F4	NM_000307
1112	cg20076126	-0.1239	0.0336423	chr14	GALNTL1;GALNTL1	NM_001168368;NM_020692
1113	cg20098118	0.199491	0.0473274	chrX	LOC100133957;UXT;LOC100133957;UXT	NR_028119;NM_004182;NR_027444;NM_153477
1114	cg20107346	-0.0353129	0.0488164	chr12
1115	cg20123374	-0.0547415	0.0448971	chrX
1116	cg20139706	0.080907	0.0466862	chr2
1117	cg20154264	0.18258	0.044448	chr13	UPF3A;UPF3A	NM_023011;NM_080687
1118	cg20168761	-0.0542324	0.0474094	chr10
1119	cg20208600	0.28301	0.0333101	chr11	TMEM216	NM_016499
1120	cg20219360	0.23962	0.0466593	chrX	WDR13;WDR13;WDR13	NR_029427;NM_017883;NM_001166426
1121	cg20222376	-0.179995	0.0425367	chr19	AKAP8L	NM_014371
1122	cg20232986	0.0638157	0.0466862	chr6
1123	cg20262028	-0.0278033	0.049109	chrX	USP11	NM_004651
1124	cg20267101	-0.0880899	0.0407056	chr3	BOC;WDR52	NM_033254;NM_001164496
1125	cg20279561	0.0528695	0.0469519	chr13	ATP11A;ATP11A	NM_015205;NM_032189
1126	cg20323571	-0.072099	0.0496193	chr1	MIR488;ASTN1;ASTN1	NR_030163;NM_207108;NM_004319
1127	cg20348189	-0.0515745	0.0472055	chr2	CRIM1	NM_016441
1128	cg20359888	-0.061017	0.0472055	chr15	ALPK3	NM_020778
1129	cg20437892	-0.0596419	0.0474094	chr2
1130	cg20460101	0.219437	0.0336423	chr7	CDK6	NM_001145306
1131	cg20469935	0.0622447	0.0466862	chrX	LOC286467	NR_026975
1132	cg20481789	0.0947541	0.035974	chr19	CLPTM1	NM_001294
1133	cg20495365	-0.112621	0.0407056	chr4	RGS12;RGS12;RGS12	NM_198227;NM_198229;NM_002926
1134	cg20509675	-0.0419191	0.0407056	chr15	CIB2	NM_006383
1135	cg20557017	0.250268	0.047604	chrX	CITED1;CITED1	NM_001144886;NM_004143
1136	cg20557801	-0.041387	0.049109	chr15	LBXCOR1	NM_001031807
1137	cg20569128	0.180915	0.0473565	chrX
1138	cg20569588	-0.0463157	0.0457723	chr1	TTC22;TTC22	NM_017904;NM_001114108
1139	cg20593767	-0.0449014	0.0497496	chrX	ARMCX1	NM_016608
1140	cg20609679	-0.0781025	0.0466862	chr1	SMYD3	NM_001167740
1141	cg20627633	-0.0441768	0.0404938	chr2	NCAPH	NM_015341
1142	cg20654256	-0.191997	0.0447042	chrX	GLRA4	NM_001024452
1143	cg20685215	0.10353	0.0474094	chr8	PINX1	NM_017884
1144	cg20722987	-0.136184	0.0457723	chr11
1145	cg20725239	-0.040813	0.0457723	chr11	HEPACAM;HEPACAM	NM_152722;NM_152722
1146	cg20742906	-0.055871	0.0447042	chr10	MEIG1	NM_001080836
1147	cg20780998	0.155928	0.0330297	chrX
1148	cg20784907	0.229102	0.0445295	chrX
1149	cg20788415	0.252415	0.043183	chrX	MIR106A	NR_029523
1150	cg20842040	0.127365	0.027084	chrX	PRPS2;PRPS2;PRPS2;PRPS2	NM_002765;NM_001039091;NM_002765;NM_001039091
1151	cg20872639	-0.0362744	0.0376496	chr6	PHF1;PHF1;PHF1	NR_027692;NM_002636;NM_024165
1152	cg20930514	-0.0318562	0.0466862	chr14
1153	cg20948024	0.184566	0.049109	chr3	COL8A1;MIR548G;COL8A1	NM_001850;NR_031662;NM_020351
1154	cg20952364	-0.169227	0.0469519	chrX
1155	cg20959460	0.0912446	0.0445295	chr5
1156	cg20978230	-0.0712106	0.0357281	chrX	MIR503;MGC16121	NR_030228;NR_024607
1157	cg21020871	0.355591	0.0471023	chr13
1158	cg21055944	-0.0599304	0.0336423	chr22	EFCAB6;EFCAB6	NM_198856;NM_022785
1159	cg21073748	0.101409	0.0355317	chr8
1160	cg21080294	0.140729	0.0407056	chrX	PRPS1	NM_002764
1161	cg21094405	-0.1668	0.0424888	chr13	MCF2L;MCF2L	NM_001112732;NM_024979
1162	cg21106946	-0.0736417	0.0474094	chr13
1163	cg21113886	0.29822	0.0425367	chrX	MTM1	NM_000252
1164	cg21147310	0.105102	0.0211516	chr1	MCOLN3	NM_018298
1165	cg21158178	0.131956	0.0469519	chrX	PHF8	NM_015107
1166	cg21170920	-0.0457696	0.047604	chr1	PAX7;PAX7;PAX7	NM_002584;NM_001135254;NM_013945
1167	cg21187352	0.0638376	0.0405282	chr3	GRM7;GRM7	NM_000844;NM_181874
1168	cg21195120	0.0648537	0.0424315	chrX	MBTPS2	NM_015884
1169	cg21196136	-0.0497779	0.0407056	chr19	SNAR-C1;SNAR-C2;SNAR-C5	NR_024220;NR_024217;NR_024219
1170	cg21248478	-0.184438	0.0498896	chrX	CLIC2;CLIC2	NM_001289;NM_001289
1171	cg21267792	0.162182	0.0469409	chrX	PIM2	NM_006875
1172	cg21294096	-0.060307	0.0488164	chrX	AMMECR1	NM_001171689
1173	cg21322248	-0.0567454	0.027084	chr15	PSTPIP1	NM_003978
1174	cg21330088	-0.0645012	0.0355317	chr4	APBB2;APBB2;APBB2	NM_004307;NM_173075;NM_001166050
1175	cg21330641	-0.0387378	0.0404938	chrX	SEPT6;MIR766;SEPT6;SEPT6;SEPT6	NM_015129;NR_030413;NM_145802;NM_145800;NM_145799
1176	cg21350575	0.0677712	0.0473504	chr21	CHODL;CHODL	NM_024944;NM_024944
1177	cg21356837	0.0434501	0.0412114	chr13	OXGR1	NM_080818
1178	cg21357629	-0.0738809	0.0357281	chr21
1179	cg21372286	-0.0873887	0.0427277	chr22	NUP50;NUP50	NM_153645;NM_007172
1180	cg21406967	-0.106536	0.0407056	chr7	TRIP6;SLC12A9	NM_003302;NM_020246
1181	cg21412053	-0.161968	0.0497496	chrX
1182	cg21415060	-0.157352	0.0466862	chr1	FCER1A	NM_002001
1183	cg21451869	-0.0456713	0.0322673	chr20	MMP9	NM_004994
1184	cg21474854	0.116506	0.0474094	chrX	ZMYM3;ZMYM3;BCYRN1;ZMYM3;ZMYM3	NM_001171163;NM_201599;NR_001568;NM_005096;NM_001171162
1185	cg21494069	0.147649	0.0466862	chr7	LUC7L2	NM_016019
1186	cg21547979	0.126658	0.0492527	chr19	SEC1;DBP;CA11	NR_004401;NM_001352;NM_001217
1187	cg21578351	-0.0460198	0.045203	chr15
1188	cg21585627	0.105849	0.0426512	chr6	TUBB	NM_178014
1189	cg21608605	0.133483	0.0473504	chr6	ESR1;ESR1;ESR1;ESR1	NM_000125;NM_001122740;NM_001122741;NM_001122742
1190	cg21626493	-0.0743893	0.0322673	chrX	LRCH2	NM_020871
1191	cg21639387	0.0284306	0.0469519	chr8
1192	cg21662836	0.11334	0.0474094	chrX	FUNDC2	NM_023934
1193	cg21693321	0.238247	0.0392873	chrX	MED12	NM_005120
1194	cg21700475	-0.0419832	0.0362104	chrX	GPR119	NM_178471
1195	cg21715212	-0.0697175	0.0472055	chr22	PHF21B;PHF21B	NM_138415;NM_001135862
1196	cg21743623	0.253482	0.049109	chr3	ATP2C1;ATP2C1;ATP2C1;ATP2C1	NM_001001485;NM_001001486;NM_014382;NM_001001487
1197	cg21744850	0.178476	0.0454439	chrX	DGKK	NM_001013742
1198	cg21745599	-0.0970599	0.0474094	chr19	CYP4F3	NM_000896
1199	cg21757148	-0.117549	0.049109	chrX	LAMP2;LAMP2;LAMP2	NM_002294;NM_013995;NM_001122606
1200	cg21854617	-0.101013	0.0394755	chr8
1201	cg21869586	0.0460514	0.0401701	chr5
1202	cg21877613	-0.0367946	0.0498946	chr6	PEX6	NM_000287
1203	cg21900764	0.0916419	0.0474094	chrX	UPF3B;UPF3B;UPF3B;UPF3B	NM_023010;NM_023010;NM_080632;NM_080632
1204	cg21910941	0.173508	0.0448473	chrX	IGBP1	NM_001551
1205	cg21930351	-0.0659415	0.0425367	chr17	SLFN13	NM_144682
1206	cg21944459	-0.171743	0.049109	chrX	FAM9C	NM_174901
1207	cg21961527	-0.0842308	0.0407056	chr12	LHX5	NM_022363
1208	cg21995686	-0.0717227	0.0478603	chr4
1209	cg22067189	-0.0437848	0.0495708	chrX	PPP1R2P9	NR_002191
1210	cg22092397	-0.0827968	0.0402174	chr5
1211	cg22115808	-0.0827766	0.0405608	chr16	NUDT16L1	NM_032349
1212	cg22118655	0.0862284	0.0473274	chr22	ELFN2	NM_052906
1213	cg22139983	-0.221362	0.0498273	chr12
1214	cg22148652	0.0342835	0.0466862	chr2	ARL5A;ARL5A;ARL5A	NM_012097;NM_001037174;NM_177985
1215	cg22215739	-0.0543595	0.0377968	chrX	MAGEB18;MAGEB18	NM_173699;NM_173699
1216	cg22283528	-0.0591667	0.0322673	chr6	STK19;DOM3Z	NR_026717;NM_005510
1217	cg22366395	0.110947	0.038336	chrX	TRAPPC2;TRAPPC2;TRAPPC2;OFD1;OFD1	NM_014563;NM_001128835;NM_001011658;NM_003611;NM_003611
1218	cg22367549	0.0995662	0.0472055	chr1	ATP2B4;ATP2B4	NM_001001396;NM_001684
1219	cg22370480	-0.0791348	0.037697	chr2	ADD2;ADD2;ADD2;ADD2;ADD2	NM_017488;NM_017482;NM_001617;NM_017484;NM_017483
1220	cg22395236	-0.186485	0.0488164	chrX
1221	cg22399096	0.350154	0.0335782	chrX	ZNF449;ZNF75D	NM_152695;NM_007131
1222	cg22455616	0.290283	0.0410634	chrX	HDAC8;HDAC8;HDAC8;HDAC8;HDAC8;HDAC8	NM_001166418;NM_001166422;NM_001166448;NM_018486;NM_001166420;NM_001166419
1223	cg22461018	-0.058486	0.0479258	chr4	MORF4	NM_006792
1224	cg22466573	-0.0600873	0.0357288	chrX
1225	cg22476295	-0.0531476	0.0474094	chr7	PDGFA;PDGFA;PDGFA;PDGFA	NM_002607;NM_033023;NM_002607;NM_033023
1226	cg22500518	-0.0676569	0.049109	chr7	TMEM184A	NM_001097620
1227	cg22519420	-0.0294019	0.0400951	chr17	HGS	NM_004712
1228	cg22522509	0.0794484	0.0445295	chr21	NRIP1	NM_003489
1229	cg22609277	0.0464192	0.0478603	chr1
1230	cg22621535	-0.0557609	0.0472932	chr12	DAO	NM_001917
1231	cg22654677	-0.0425828	0.037697	chr17	ARRB2;ARRB2	NM_199004;NM_004313
1232	cg22685463	-0.0601097	0.0404938	chr17	ZBTB4;POLR2A;ZBTB4	NM_020899;NM_000937;NM_020899
1233	cg22697325	-0.0835545	0.0457723	chr1	MACF1	NM_012090
1234	cg22710633	-0.107135	0.0425367	chrX	SSX8	NR_027250
1235	cg22747643	0.094525	0.0436026	chr7	MICALL2	NM_182924
1236	cg22753417	-0.116074	0.0457723	chr11	GPR137;GPR137;BAD;BAD	NM_001170726;NM_001170881;NM_004322;NM_032989
1237	cg22925006	0.0330961	0.0472055	chr8	ATP6V1C1	NM_001695
1238	cg22947959	-0.040915	0.0404938	chr10	PLAU;PLAU;C10orf55;PLAU;PLAU	NM_002658;NM_002658;NM_001001791;NM_001145031;NM_001145031
1239	cg22972232	-0.101592	0.0466862	chrX
1240	cg22974462	0.0502056	0.049109	chr8
1241	cg22975791	0.170687	0.047604	chrX
1242	cg23016726	-0.0395093	0.0445295	chr22	CACNA1I;CACNA1I	NM_001003406;NM_021096
1243	cg23037321	0.190993	0.027084	chr1	MR1	NM_001531
1244	cg23085846	0.083056	0.0342656	chr20	TPD52L2;TPD52L2;TPD52L2;TPD52L2;TPD52L2;TPD52L2	NM_199363;NM_003288;NM_199362;NM_199360;NM_199359;NM_199361
1245	cg23105697	0.157716	0.0485413	chr2	HOXD10	NM_002148
1246	cg23140620	-0.17618	0.0472055	chrX	PAK3;PAK3;PAK3;PAK3;PAK3;PAK3	NM_001128168;NM_001128173;NM_001128172;NM_001128166;NM_002578;NM_001128167
1247	cg23141355	0.0382211	0.0336423	chr3
1248	cg23142964	-0.0296674	0.0473274	chr1	SSX2IP;SSX2IP;SSX2IP;SSX2IP;SSX2IP	NM_014021;NM_001166295;NM_001166417;NM_001166294;NM_001166293
1249	cg23156356	0.102292	0.0336423	chrX	RRAGB;RRAGB	NM_006064;NM_016656
1250	cg23157089	-0.0425866	0.0474094	chr6	NT5E	NM_002526
1251	cg23179657	-0.0455246	0.0472055	chr19	IL27RA;RLN3	NM_004843;NM_080864
1252	cg23194060	0.0894954	0.049109	chrX	MBTPS2	NM_015884
1253	cg23206017	-0.0337345	0.0478603	chrX	TMEM47	NM_031442
1254	cg23210456	-0.10407	0.0457723	chrX	ITIH5L	NM_198510
1255	cg23256466	-0.0702771	0.0478551	chr10	NFKB2;NFKB2;NFKB2	NM_001077494;NM_001077493;NM_002502
1256	cg23269489	0.181779	0.0404263	chrX	BCORL1	NM_021946
1257	cg23290344	0.0473708	0.0404938	chr8	NEFM;NEFM	NM_001105541;NM_005382
1258	cg23299641	0.180976	0.0472055	chrX	KCNE1L	NM_012282
1259	cg23346544	-0.105383	0.0466862	chr8
1260	cg23368159	-0.107529	0.0445295	chr6
1261	cg23371208	-0.0593764	0.0457723	chr11	MIR130A	NR_029673
1262	cg23398508	0.0914965	0.027084	chr17
1263	cg23432249	-0.0995139	0.0478603	chr7
1264	cg23448850	0.0946409	0.0468061	chr7
1265	cg23480284	0.199634	0.0447042	chr19	DPF1	NM_001135156
1266	cg23493585	0.0457072	0.0413108	chr9
1267	cg23521468	0.144196	0.0448473	chr5
1268	cg23622369	0.113615	0.0466862	chr17	HSD17B1	NM_000413
1269	cg23656322	-0.110629	0.027084	chr1	S100A2	NM_005978
1270	cg23676302	0.208717	0.027084	chr2
1271	cg23682310	-0.0296729	0.0492926	chr2
1272	cg23685151	-0.0405081	0.0425367	chr2
1273	cg23711881	-0.0294443	0.0466862	chr14	C14orf102;C14orf102	NM_017970;NM_199043
1274	cg23714856	0.173662	0.0444445	chrX	TBC1D8B;TBC1D8B	NM_017752;NM_198881
1275	cg23723486	0.113097	0.0447042	chr7
1276	cg23750151	-0.0925537	0.0425367	chr6	PSMB8;PSMB8	NM_004159;NM_148919
1277	cg23834813	-0.0671112	0.0491005	chr10	SH2D4B;SH2D4B	NM_207372;NM_001145719
1278	cg23841280	-0.0781551	0.04973	chr2	UGT1A6;UGT1A10;UGT1A9;UGT1A6;UGT1A7;UGT1A5;UGT1A8	NM_001072;NM_019075;NM_021027;NM_205862;NM_019077;NM_019078;NM_019076
1279	cg23858360	0.293815	0.0407056	chr10	TSPAN14;TSPAN14	NM_001128309;NM_030927
1280	cg23872179	0.224382	0.0457723	chrX	SH3BGRL;SH3BGRL;HMGN5	NM_003022;NM_003022;NM_030763
1281	cg23889047	-0.201833	0.0407056	chr1	CAMTA1	NM_015215
1282	cg23933216	-0.154413	0.0435846	chr1	PDE4DIP	NM_022359
1283	cg23937960	0.0586142	0.0425367	chr6	GNL1	NM_005275
1284	cg23955979	-0.177052	0.0357288	chr17
1285	cg23967540	-0.0729681	0.0342656	chr8
1286	cg23968678	-0.0558017	0.0466862	chr19	MBOAT7;MBOAT7;MBOAT7;TSEN34;MBOAT7;MBOAT7;MBOAT7;MBOAT7;MBOAT7;TSEN34	NM_001146056;NM_024298;NM_001146082;NM_024075;NM_001146083;NM_024298;NM_001146082;NM_001146056;NM_001146083;NM_001077446
1287	cg23973429	0.0776946	0.0406698	chr8	GRHL2;GRHL2	NM_024915;NM_024915
1288	cg23973873	-0.0494183	0.0421681	chr3	LOC285205	NR_015394
1289	cg23983173	-0.111245	0.027084	chr15	TMEM87A;TMEM87A	NM_001110503;NM_015497
1290	cg23986186	0.288133	0.0404938	chrX	BCYRN1;TAF1;TAF1	NR_001568;NM_138923;NM_004606
1291	cg23993438	-0.0618703	0.0400532	chr17	ETV4;ETV4;ETV4	NM_001986;NM_001079675;NM_001079675
1292	cg24044478	0.0357807	0.0445295	chr8	PLEC1;PLEC1	NM_000445;NM_201378
1293	cg24046087	0.0757323	0.0355317	chrX	PDZD4	NM_032512
1294	cg24046155	-0.124087	0.0260798	chr19	LINGO3	NM_001101391
1295	cg24051456	0.0970284	0.0490063	chr10	FAM45B;FAM45A	NR_027141;NM_207009
1296	cg24058732	0.208061	0.049109	chr2
1297	cg24109744	-0.0978936	0.0497496	chr19	KDM4B	NM_015015
1298	cg24197116	-0.29879	0.0458701	chrX
1299	cg24248049	0.162567	0.0466862	chrX	FAM122C;FAM122C;FAM122C;FAM122C;FAM122C;FAM122C;FAM122C	NM_001170783;NM_138819;NM_001170784;NM_001170779;NM_001170782;NM_001170781;NM_001170780
1300	cg24266261	-0.0241957	0.0474094	chr10	PLEKHA1	NM_001001974
1301	cg24268663	-0.0653639	0.0466862	chrX	GABRA3;MIR105-1	NM_000808;NR_029521
1302	cg24271203	-0.0505768	0.0474094	chr12	IL31;LRRC43	NM_001014336;NM_152759
1303	cg24280819	0.046858	0.0421681	chr10
1304	cg24303888	-0.0722271	0.0466862	chr6	DDR1;DDR1;DDR1	NM_013993;NM_013993;NM_001954
1305	cg24331682	-0.048863	0.0447042	chrX	KLHL15	NM_030624
1306	cg24333206	0.137016	0.0474094	chr3	SLC25A36;SLC25A36	NM_001104647;NM_018155
1307	cg24347098	-0.0690848	0.0474094	chr1	SLC16A1;SLC16A1	NM_001166496;NM_003051
1308	cg24347741	-0.224964	0.0460129	chrX
1309	cg24387542	-0.0632809	0.035974	chr17	LGALS9B	NM_001042685
1310	cg24412895	-0.0750772	0.0469519	chr8
1311	cg24414089	-0.0304797	0.0466862	chr17	MRC2	NM_006039
1312	cg24453153	-0.0674479	0.0498946	chr4	RGS12;RGS12;RGS12	NM_198229;NM_198227;NM_002926
1313	cg24478779	-0.0769734	0.0341723	chr2	LOC150622	NR_026832
1314	cg24502904	0.128467	0.0424888	chr12	EIF4B	NM_001417
1315	cg24504300	0.184761	0.045203	chrX	TIMM8A;TIMM8A	NM_001145951;NM_004085
1316	cg24519598	0.0762061	0.0443409	chr1	PIK3R3;PIK3R3;PIK3R3	NM_001114172;NM_003629;NM_003629
1317	cg24535130	0.1377	0.0447042	chr17	NOTUM	NM_178493
1318	cg24559969	0.256529	0.0404938	chrX	TRPC5;ZCCHC16	NM_012471;NM_001004308
1319	cg24616736	0.17202	0.0335782	chrX	HDAC6	NM_006044
1320	cg24640440	-0.053832	0.0469519	chr1
1321	cg24658899	0.18787	0.0394755	chrX	DLG3	NM_021120
1322	cg24689245	-0.0631823	0.0407056	chr11	DGAT2	NM_032564
1323	cg24706857	-0.253684	0.0478603	chrX
1324	cg24741770	-0.169541	0.0466862	chrX	FAAH2	NM_174912
1325	cg24852779	-0.0323956	0.0404938	chrX	ALG13;ALG13;ALG13;ALG13;ALG13;ALG13;ALG13;ALG13;ALG13;ALG13;ALG13;ALG13	NR_033132;NM_001099922;NM_018466;NR_033134;NR_033124;NR_033131;NM_001039210;NR_033125;NR_033127;NM_001168385;NR_033128;NR_033129
1326	cg24853313	-0.0760666	0.0466862	chrX	MIR892A	NR_030584
1327	cg24879426	-0.0664175	0.0407056	chr3	RHOA;TCTA	NM_001664;NM_022171
1328	cg24884142	0.0852881	0.0442877	chr1	TBX15;TBX15	NM_152380;NM_152380
1329	cg24913868	-0.117062	0.0431003	chr10	NKX2-3	NM_145285
1330	cg24922817	-0.0676433	0.0336423	chr19
1331	cg24936695	-0.0562609	0.0322673	chr21	CLDN17	NM_012131
1332	cg24974982	-0.0823809	0.0407056	chr22	LOC730668	NR_027240
1333	cg24980481	-0.0921052	0.0473274	chrX	SMS	NM_004595
1334	cg25064853	0.0648698	0.0336423	chr2	PIKFYVE;PIKFYVE;PIKFYVE;PIKFYVE	NM_152671;NM_015040;NM_152671;NM_015040
1335	cg25072733	0.200658	0.0468061	chr13	C13orf36	NM_203451
1336	cg25084393	0.27938	0.0313043	chrX	CTPS2;CTPS2;CTPS2;CTPS2	NM_001144002;NM_175859;NM_001144002;NM_019857
1337	cg25098707	-0.0646761	0.0322673	chr2	FAM134A;C2orf24	NM_024293;NM_015680
1338	cg25141133	0.183618	0.0401701	chrX	FRMPD4	NM_014728
1339	cg25141890	-0.0358054	0.0357281	chr1
1340	cg25143508	-0.128061	0.0394755	chr1	PRELP;PRELP	NM_201348;NM_002725
1341	cg25153755	0.14326	0.0401701	chrX	SYN1;SYN1	NM_006950;NM_133499
1342	cg25156485	0.199448	0.0459565	chrX	MSN	NM_002444
1343	cg25163015	-0.0559204	0.045203	chr11	BAD;GPR137;GPR137;BAD;GPR137;GPR137	NM_032989;NM_020155;NM_001170726;NM_004322;NM_001170880;NM_001170881
1344	cg25214902	-0.0444761	0.0342656	chr7
1345	cg25245133	0.0359877	0.0333101	chr17	C17orf93	NR_024103
1346	cg25268100	-0.0311348	0.0472055	chr10	INPP5A	NM_005539
1347	cg25278669	-0.0569749	0.0497496	chr11	ZBTB3	NM_024784
1348	cg25359581	0.118978	0.0357288	chrX	DYNLT3;DYNLT3	NM_006520;NM_006520
1349	cg25395546	0.230783	0.049109	chrX	MST4;MST4;MST4;MST4;MST4	NM_001042453;NM_001042452;NM_001042453;NM_016542;NM_016542
1350	cg25424556	0.113861	0.0353514	chrX	USP51	NM_201286
1351	cg25424856	0.148985	0.035974	chrX	SHROOM4;SHROOM4;SHROOM4	NM_020717;NM_020717;NR_027121
1352	cg25488288	-0.0425678	0.0336423	chr10	DIP2C	NM_014974
1353	cg25511363	-0.0515112	0.0472055	chr10	ERLIN1;ERLIN1;ERLIN1	NM_006459;NM_001100626;NM_006459
1354	cg25547232	-0.0411344	0.0445295	chr19	CNN2;CNN2;CNN2;CNN2	NM_004368;NM_201277;NM_201277;NM_004368
1355	cg25549519	-0.110463	0.0448473	chrX	MAGEA10;MAGEA10	NM_001011543;NM_021048
1356	cg25567674	0.0527388	0.0462354	chr3
1357	cg25574603	-0.0350499	0.0457723	chr12	GSG1;GSG1	NM_001080554;NM_001080555
1358	cg25593391	-0.104515	0.0407056	chr17	C17orf77;CD300LD	NM_152460;NM_001115152
1359	cg25600766	-0.134325	0.0404938	chr12	ST8SIA1	NM_003034
1360	cg25623604	0.143706	0.0457723	chr8	STK3	NM_006281
1361	cg25734572	0.0656607	0.0496193	chr19
1362	cg25739309	-0.110661	0.0333101	chr17	RPTOR;RPTOR	NM_001163034;NM_020761
1363	cg25739715	-0.0429006	0.0404263	chr22	OSM	NM_020530
1364	cg25770176	-0.106695	0.0462354	chr10	PANK1	NM_148977
1365	cg25792651	-0.0398341	0.0336423	chr3	CLDN18;CLDN18	NM_016369;NM_001002026
1366	cg25804018	-0.0297425	0.0498896	chr8	KCNK9	NM_016601
1367	cg25807044	-0.0563667	0.0395046	chr2
1368	cg25815753	-0.063959	0.0447042	chr19
1369	cg25824543	0.124489	0.0466862	chr19	ZNF175	NM_007147
1370	cg25843975	0.156488	0.049109	chrX	BRCC3;BRCC3;MTCP1NB;MTCP1	NM_024332;NM_001018055;NM_001018024;NM_001018025
1371	cg25874079	0.197727	0.0472055	chrX	RLIM;RLIM	NM_183353;NM_016120
1372	cg25902187	0.0610695	0.0474094	chr15	PYGO1	NM_015617
1373	cg25906332	-0.0377929	0.0336423	chr14	SLC25A29	NM_001039355
1374	cg25922355	0.0512709	0.0357281	chr7	SRRM3	NM_001110199
1375	cg25943872	0.155183	0.0482011	chrX	SLC16A2	NM_006517
1376	cg25996663	-0.116033	0.0471023	chr6	FRK	NM_002031
1377	cg26011771	-0.092174	0.0336423	chr1	IQCC;IQCC	NM_018134;NM_001160042
1378	cg26018431	-0.0530278	0.0425367	chr19	CCDC114	NM_144577
1379	cg26039806	0.0617008	0.0474094	chr11	RNF121;LOC100133315;RNF121;RNF121	NR_024148;NR_029192;NR_024147;NM_018320
1380	cg26051413	0.226802	0.0404938	chr11	ASCL2	NM_005170
1381	cg26053480	0.117108	0.0466862	chr7
1382	cg26064831	0.0757707	0.0416889	chrX	POLA1	NM_016937
1383	cg26096100	-0.0481268	0.044448	chr5
1384	cg26140100	-0.130552	0.033102	chrX	APLN	NM_017413
1385	cg26144445	0.100311	0.0475042	chrX	SLC35A2;SLC35A2;SLC35A2;SLC35A2	NM_001042498;NM_005660;NM_001032289;NM_001042498
1386	cg26164164	0.0553012	0.0417716	chr17	TOP2A;TOP2A	NM_001067;NM_001067
1387	cg26180383	0.076723	0.0488017	chr8	MIR1207;PVT1	NR_031612;NR_003367
1388	cg26190455	0.20083	0.0469519	chrX	PRPS2;PRPS2	NM_002765;NM_001039091
1389	cg26214742	0.175967	0.0405282	chr5	H2AFY;H2AFY;H2AFY;H2AFY	NM_138610;NM_138609;NM_004893;NM_001040158
1390	cg26257082	0.0875031	0.0474094	chr1
1391	cg26263421	-0.0785893	0.037697	chr19
1392	cg26266944	-0.105787	0.0350204	chr4	ZNF509	NM_145291
1393	cg26267678	-0.0518277	0.0468061	chr2	KCNF1;KCNF1	NM_002236;NM_002236
1394	cg26268044	0.0634468	0.0362786	chr10	CCNJ;CCNJ;CCNJ	NM_001134376;NM_001134375;NM_019084
1395	cg26271045	0.333657	0.04973	chr2	LRRFIP1	NM_001137550
1396	cg26289980	0.333382	0.0404938	chrX	LOC100272228;CXorf40B	NR_027456;NM_001013845
1397	cg26325723	0.215921	0.043153	chr20	ACSS1	NM_032501
1398	cg26353468	0.0917419	0.0447042	chr19	FLJ26850	NR_027257
1399	cg26371206	0.0604879	0.049109	chr20	BFSP1;BFSP1	NM_001161705;NM_001195
1400	cg26385085	-0.130696	0.0336423	chr4	ZNF718;ZNF595	NM_001039127;NM_182524
1401	cg26395098	-0.0518717	0.0498896	chrX	MAGEB2	NM_002364
1402	cg26406074	0.0662281	0.0466862	chr13	NBEA	NM_015678
1403	cg26490274	-0.0252417	0.0474094	chr16	GLIS2	NM_032575
1404	cg26505663	0.0753513	0.0474094	chr15	GRINL1A;GRINL1A;GCOM1;GCOM1;GRINL1A	NM_015532;NR_027390;NM_001018090;NM_001018091;NM_001018102
1405	cg26519783	0.0643748	0.0404938	chrX	STAG2	NM_001042749
1406	cg26548834	0.132199	0.0466593	chr7	FOXK1	NM_001037165
1407	cg26551975	-0.108009	0.0492527	chr7	HOXA10;HOXA10	NM_153715;NM_018951
1408	cg26560222	0.0482958	0.0224895	chr1	DMRTA2;DMRTA2	NM_032110;NM_032110
1409	cg26576576	0.0654317	0.0474094	chr1	PTPN14	NM_005401
1410	cg26581200	-0.0668138	0.0404938	chr22	LIF	NM_002309
1411	cg26584034	0.150119	0.0490361	chr5	SYNPO;SYNPO	NM_001166208;NM_001166209
1412	cg26598396	0.156654	0.0407056	chrX
1413	cg26619043	0.0362728	0.0474094	chr17	ARSG;SLC16A6	NM_014960;NM_004694
1414	cg26624294	0.122728	0.0404938	chrX	NSDHL;NSDHL;CETN2	NM_001129765;NM_015922;NM_004344
1415	cg26638011	0.0514459	0.0460481	chr11	VPS37C	NM_017966
1416	cg26645509	0.0741003	0.0497496	chr2
1417	cg26646118	0.0612919	0.0474094	chr6	ZBTB22;TAPBP;TAPBP;TAPBP;ZBTB22	NM_005453;NM_003190;NM_172208;NM_172209;NM_001145338
1418	cg26655138	0.265525	0.045203	chrX	RBMX2	NM_016024
1419	cg26685941	-0.191271	0.0474094	chr13	ABCC4;ABCC4	NM_001105515;NM_005845
1420	cg26699341	-0.0948726	0.049109	chrX	RAB9B	NM_016370
1421	cg26703758	-0.0405455	0.0472055	chr11	KCNC1;KCNC1	NM_004976;NM_001112741
1422	cg26710619	-0.105541	0.0457723	chrX
1423	cg26746936	0.0472978	0.0492308	chr19	GRIK5	NM_002088
1424	cg26787199	-0.0972562	0.0416889	chr16	SYNGR3	NM_004209
1425	cg26820037	0.0529807	0.0402174	chr10	FGF8;FGF8;FGF8;FGF8	NM_033164;NM_033165;NM_033163;NM_006119
1426	cg26828119	0.0986666	0.042254	chr19	APLP1;APLP1	NM_001024807;NM_005166
1427	cg26847850	0.0569356	0.0472055	chr2	CYBRD1;CYBRD1	NM_001127383;NM_024843
1428	cg26880806	-0.0434169	0.027084	chr2	COX5B	NM_001862
1429	cg26902216	0.0473816	0.0474094	chr8	MAL2	NM_052886
1430	cg26918720	0.22325	0.0488164	chrX	ARHGAP4;ARHGAP4	NM_001164741;NM_001666
1431	cg26918987	-0.0964671	0.0469519	chr5
1432	cg26933021	-0.0890688	0.049109	chr1
1433	cg26933736	-0.0357001	0.0469519	chr6	RWDD2A;PGM3	NM_033411;NM_015599
1434	cg26935265	-0.0691676	0.0407056	chr1	NIPAL3	NM_020448
1435	cg26960176	-0.0337084	0.0497952	chr11	C11orf46	NM_152316
1436	cg26968501	0.159068	0.0466862	chrX
1437	cg27039662	0.0831871	0.049109	chr8
1438	cg27043453	0.0816486	0.0401701	chr7
1439	cg27050985	-0.0189278	0.04973	chr14
1440	cg27074041	0.133201	0.0466862	chr2	NR4A2	NM_006186
1441	cg27129297	-0.0683081	0.0445295	chr1	RUSC1;RUSC1;C1orf104;RUSC1;RUSC1	NM_001105204;NM_014328;NM_001039517;NM_001105203;NM_001105205
1442	cg27153798	0.332718	0.0474094	chrX	ARAF	NM_001654
1443	cg27168291	0.0555135	0.0471023	chr6	ZBTB22;TAPBP;TAPBP;TAPBP;ZBTB22	NM_005453;NM_003190;NM_172208;NM_172209;NM_001145338
1444	cg27169020	0.121735	0.0457723	chr15	BNC1	NM_001717
1445	cg27186013	0.0980877	0.0407056	chr4	HPGDS	NM_014485
1446	cg27222736	0.221932	0.0224895	chr6
1447	cg27233027	-0.0732242	0.0472932	chr1	NME7;NME7	NM_013330;NM_197972
1448	cg27241639	0.0452059	0.0472055	chr7
1449	cg27266257	0.172114	0.0466862	chr10	ASB13;ASB13	NR_024581;NM_024701
1450	cg27269492	-0.0565718	0.0335782	chr3	SLC6A20;SLC6A20	NM_020208;NM_022405
1451	cg27270003	-0.0807116	0.0466862	chr4	PGM2	NM_018290
1452	cg27297123	0.197381	0.0322673	chr10
1453	cg27315157	0.110567	0.0488164	chr1	IFI44L;IFI44L	NM_006820;NM_006820
1454	cg27375297	0.0603516	0.0355317	chr6	C6orf136;C6orf136;C6orf136	NM_001161376;NM_145029;NM_001109938
1455	cg27382931	0.171476	0.0474094	chrX	GPC4	NM_001448
1456	cg27384352	0.251993	0.0442877	chr7	CDK5;CDK5;SLC4A2	NM_004935;NM_001164410;NM_003040
1457	cg27389255	0.1258	0.035974	chr11	PDE3B;PSMA1	NM_000922;NM_148976
1458	cg27389609	0.105747	0.0478603	chrX
1459	cg27417677	0.104795	0.0457723	chr7	MESTIT1;MEST;MEST;MEST	NR_004382;NM_002402;NM_177524;NM_177525
1460	cg27534772	-0.0665337	0.0425367	chr1	PLEKHM2	NM_015164
1461	cg27550262	-0.0492453	0.0473274	chr7	AGAP3;AGAP3	NM_031946;NM_001042535
1462	cg27553638	-0.0667053	0.0473809	chrX	SPANXD;SPANXE;SPANXE	NM_032417;NM_145665;NM_145665
1463	cg27564373	0.163051	0.0406698	chrX	UBA1	NM_153280
1464	cg27564579	-0.0699471	0.0336423	chr20	COL9A3	NM_001853
1465	cg27598806	-0.0947919	0.0468061	chr22	MMP11	NM_005940
1466	cg27621745	-0.092471	0.0472055	chr8	CHMP4C	NM_152284
1467	cg27626023	0.177705	0.049109	chrX
1468	cg27629673	-0.0467614	0.049109	chr5	ADCY2	NM_020546
1469	cg27635135	-0.0555073	0.0404938	chr7
1470	cg27666046	-0.10894	0.0357281	chr17	SECTM1	NM_003004
1471	ch.12.57770130R	0.115099	0.045203	chr12
1472	ch.17.1874959R	0.0764489	0.0474094	chr17
1473	ch.X.2195099F	-0.0475466	0.0466862	chrX	PASD1	NM_173493

## Sheet: npfos_m
	Name	beta	adj.P.Val	chr	UCSC_RefGene_Name	UCSC_RefGene_Accession
1	cg00001583	0.0274965	0.0331718	chr1	NR5A2;NR5A2	NM_205860;NM_003822
2	cg00002810	0.0133541	0.0265793	chr1	DAB1	NM_021080
10	cg00010742	0.0563696	0.030213	chr1	BARHL2	NM_020063
13	cg00017546	-0.0132569	0.0141194	chr1	MED18;MED18	NM_017638;NM_001127350
30	cg00069002	0.0382932	0.0347583	chr1
32	cg00072675	-0.0201175	0.0103424	chr1
38	cg00094095	-0.056367	0.0296724	chr1	SNRPE	NM_003094
42	cg00097790	-0.0215819	0.0305541	chr1	LOC645166;LOC645166;LOC645166	NR_027354;NR_027356;NR_027355
44	cg00099427	0.101376	0.0257877	chr1	CCDC19	NM_012337
71	cg00152644	-0.0161466	0.0103237	chr1	SPRR2E	NM_001024209
73	cg00157962	0.0907225	0.00997808	chr1	FAM102B	NM_001010883
88	cg00175403	-0.0681614	0.0460834	chr1
90	cg00176043	0.043293	0.0351632	chr1
115	cg00228891	0.0495845	0.00798474	chr1	CR1L	NM_175710
125	cg00251678	-0.0464667	0.024957	chr1	PRDM16;PRDM16	NM_022114;NM_199454
142	cg00302521	0.00749762	0.0400446	chr1	CRCT1	NM_019060
152	cg00329272	-0.0111236	0.0422717	chr1	PRDM16;PRDM16	NM_022114;NM_199454
160	cg00346208	0.0403717	0.0488345	chr1	VWA5B1	NM_001039500
183	cg00391668	0.0822716	0.0335306	chr1	ATAD3C	NM_001039211
215	cg00476580	0.00694646	0.0447547	chr1	ANP32E;ANP32E;ANP32E	NM_001136479;NM_001136478;NM_030920
222	cg00483992	-0.0188852	0.0114562	chr1
231	cg00500229	-0.0230471	0.0369394	chr1
234	cg00502254	0.0229641	0.0419772	chr1	TNFRSF8;TNFRSF8	NM_152942;NM_001243
242	cg00521598	0.0327982	0.0136689	chr1	MYCBP	NM_012333
245	cg00532502	-0.0180475	0.0215534	chr1	LOC149134	NR_015422
258	cg00558749	0.0414963	0.0347604	chr1
260	cg00562088	-0.00613754	0.0483331	chr1	MEGF6	NM_001409
262	cg00568027	-0.0182004	0.0188397	chr1	NUP133;NUP133	NM_018230;NM_018230
272	cg00594952	0.0206865	0.031042	chr1	RIMS3	NM_014747
285	cg00625425	-0.0107557	0.024443	chr1	KANK4	NM_181712
301	cg00654657	-0.0161599	0.0155234	chr1	LPPR4;LPPR4	NM_014839;NM_001166252
304	cg00664416	0.0392007	0.0266602	chr1	MANEAL;MANEAL;MANEAL;MANEAL	NM_001113482;NM_001031740;NM_152496;NM_152496
321	cg00694336	-0.010248	0.0278452	chr1	PHTF1	NM_006608
327	cg00699898	0.0109964	0.0341031	chr1	TTLL10;TTLL10	NM_153254;NM_001130045
331	cg00714874	-0.0360348	0.030534	chr1	FCRLA	NM_032738
336	cg00730820	-0.023802	0.0421114	chr1	MAP3K6	NM_004672
359	cg00769810	0.0402772	0.00948034	chr1
363	cg00775781	0.0828417	0.027504	chr1
367	cg00788170	-0.0270271	0.0361736	chr1	SNAP47;LOC100130093;JMJD4;JMJD4;LOC100130093	NM_053052;NR_024485;NM_023007;NM_001161465;NR_024486
385	cg00832476	0.0207221	0.0492998	chr1
402	cg00867230	-0.0164187	0.0196369	chr1
406	cg00873050	0.0278385	0.0160541	chr1	TSSK3;LOC100128071;TSSK3	NM_052841;NM_001167676;NM_052841
428	cg00916659	-0.0694893	0.0299887	chr1	TMEM206	NM_018252
431	cg00921097	-0.0390343	0.0380575	chr1	GPR37L1	NM_004767
434	cg00925953	-0.015211	0.0281332	chr1	TAS1R2	NM_152232
441	cg00944649	-0.012661	0.0410303	chr1	C1orf64	NM_178840
447	cg00951108	-0.0082537	0.0288137	chr1
450	cg00953777	-0.0103446	0.0426293	chr1	FBXO44;FBXO2;FBXO2;FBXO44;FBXO44;FBXO44;FBXO44	NM_183413;NM_012168;NM_012168;NM_033182;NM_183412;NM_001014765;NM_183412
457	cg00962755	0.0571619	0.0381489	chr1	PHLDA3	NM_012396
475	cg01002030	0.0373381	0.012651	chr1	RAVER2	NM_018211
478	cg01004918	-0.0134414	0.0387047	chr1
479	cg01008154	0.0514066	0.0371563	chr1	PIK3R3;PIK3R3	NM_003629;NM_001114172
498	cg01048810	-0.0327204	0.0151455	chr1	C1orf228	NM_001145636
502	cg01059331	0.0538479	0.0212182	chr1
504	cg01065413	-0.0206109	0.0227695	chr1	MIA3	NM_198551
505	cg01067151	0.0617878	0.00951593	chr1
506	cg01068006	-0.021257	0.010563	chr1	PEX14	NM_004565
522	cg01103597	-0.0329948	0.042787	chr1	RUNX3;RUNX3	NM_001031680;NM_004350
606	cg01260170	0.0112173	0.0424459	chr1	ESPNP	NR_026567
644	cg01340314	-0.0128303	0.0476758	chr1	ARL8A	NM_138795
656	cg01363596	-0.022293	0.043655	chr1	CACNA1E	NM_000721
671	cg01395667	0.0701531	0.0373004	chr1	ESPNP	NR_026567
692	cg01429933	-0.054311	0.0379067	chr1	PLEKHG5;PLEKHG5	NM_198681;NM_001042663
701	cg01447427	-0.089978	0.0363666	chr1	USP21;UFC1;USP21	NM_012475;NM_016406;NM_001014443
702	cg01448470	-0.0330595	0.0417983	chr1	IGSF21	NM_032880
728	cg01521258	0.0463822	0.0310467	chr1	CACHD1	NM_020925
745	cg01552197	0.0589966	0.00719199	chr1
757	cg01567634	-0.0104215	0.0444919	chr1	SYT6	NM_205848
764	cg01576340	0.0181287	0.027952	chr1	CTNNBIP1;CTNNBIP1	NM_001012329;NM_020248
781	cg01646665	-0.0454765	0.0499703	chr1	TMEM79;SMG5	NR_026678;NM_015327
810	cg01727764	-0.0130638	0.0442477	chr1
817	cg01755342	-0.0305762	0.0205075	chr1	CALML6	NM_138705
833	cg01780943	-0.0561576	0.0313877	chr1	TRAF5;TRAF5	NM_004619;NM_001033910
834	cg01782826	-0.0268353	0.0451224	chr1	RCSD1	NM_052862
840	cg01795562	0.0307526	0.0472935	chr1	RAB3GAP2	NM_012414
857	cg01834373	-0.0422826	0.018752	chr1	LRRC7	NM_020794
886	cg01891209	-0.00906434	0.0253726	chr1	ARTN;ARTN;ARTN;ARTN;ARTN;ARTN	NM_057160;NM_003976;NM_003976;NM_057090;NM_001136215;NM_057091
899	cg01917016	-0.0141453	0.0355546	chr1	RASSF5;RASSF5;RASSF5;RASSF5	NM_182663;NM_182665;NM_182664;NM_182665
903	cg01934756	-0.0172598	0.0470283	chr1
909	cg01952027	-0.0178977	0.0235062	chr1
914	cg01960413	-0.00843189	0.0459635	chr1
917	cg01967642	-0.0342608	0.0493427	chr1	EPHA10;EPHA10	NM_173641;NM_001099439
919	cg01971160	0.031967	0.0321882	chr1	LHX8	NM_001001933
921	cg01974375	-0.0619915	0.030751	chr1	PI4KB	NM_002651
926	cg01984304	0.0203501	0.00712364	chr1
928	cg01987224	0.030018	0.0294908	chr1
964	cg02063695	0.0442006	0.0313877	chr1
979	cg02105034	-0.0152925	0.0111916	chr1	SMG7;SMG7;SMG7	NM_201569;NM_201568;NM_173156
986	cg02117102	-0.0180106	0.0206931	chr1	HSPG2	NM_005529
994	cg02124912	0.0131126	0.0371855	chr1	GPR37L1	NM_004767
1073	cg02288964	-0.0293339	0.0436997	chr1	AGRN	NM_198576
1074	cg02290880	-0.0284065	0.0173616	chr1	CTSE;CTSE	NM_001910;NM_148964
1084	cg02313130	-0.00908594	0.0384174	chr1	CAPN8	NM_001143962
1089	cg02337836	0.0171101	0.011263	chr1	GSTM2;GSTM2	NM_001142368;NM_000848
1099	cg02364551	-0.00591054	0.0405877	chr1
1106	cg02387368	-0.0245427	0.0372125	chr1
1134	cg02455792	-0.0106107	0.0417069	chr1	ARHGEF19	NM_153213
1147	cg02481000	0.0316463	0.0358464	chr1	PRKCZ;PRKCZ;PRKCZ	NM_001033581;NM_001033582;NM_002744
1151	cg02488934	-0.037007	0.0446447	chr1
1165	cg02514914	-0.0119219	0.0355657	chr1	ATP1A4;ATP1A4	NM_001001734;NM_144699
1182	cg02566391	-0.0410767	0.031682	chr1	IL12RB2	NM_001559
1184	cg02569142	-0.0195744	0.0327792	chr1
1197	cg02612026	-0.0133658	0.0399061	chr1	CASP9;CASP9	NM_001229;NM_032996
1203	cg02625929	-0.0134381	0.0161767	chr1	HLX	NM_021958
1209	cg02630477	0.0465171	0.0357137	chr1
1210	cg02631189	-0.043525	0.0254291	chr1
1214	cg02634222	-0.0139776	0.0462485	chr1	EDN2	NM_001956
1219	cg02639366	-0.0221453	0.0309726	chr1	EIF2C4	NM_017629
1270	cg02736395	0.0434929	0.0121484	chr1
1280	cg02760280	-0.00782187	0.0235294	chr1	RAP1GAP;RAP1GAP	NM_002885;NM_001145657
1290	cg02769477	0.0832057	0.0297075	chr1
1315	cg02852407	0.100782	0.0163934	chr1	CD34;CD34	NM_001773;NM_001025109
1320	cg02862467	0.0571626	0.00636452	chr1	UBR4	NM_020765
1337	cg02898122	-0.0165227	0.0136498	chr1	RWDD3;RWDD3	NM_015485;NM_001128142
1343	cg02910873	0.0161063	0.0490869	chr1	AKR7A3	NM_012067
1349	cg02916418	-0.0288139	0.0446146	chr1	PGD	NM_002631
1354	cg02930200	0.0195425	0.0327786	chr1	DNALI1	NM_003462
1359	cg02935097	-0.0261964	0.0442591	chr1	BRDT	NM_207189
1369	cg02951739	-0.0512549	0.0280804	chr1
1370	cg02952078	0.0378729	0.0490336	chr1
1384	cg02977790	-0.0136364	0.0344316	chr1
1392	cg03001176	-0.0137105	0.0322559	chr1	SLC6A17	NM_001010898
1411	cg03047059	-0.0197321	0.0158372	chr1	HHAT;HHAT;HHAT;HHAT;HHAT;HHAT	NM_001170580;NM_001170588;NM_018194;NM_001122834;NM_001170587;NM_001170564
1417	cg03055021	-0.0109767	0.0258496	chr1	FHAD1	NM_052929
1440	cg03113358	-0.0298906	0.0382542	chr1	PADI1	NM_013358
1442	cg03119829	0.0556261	0.0297075	chr1
1454	cg03142956	-0.0176846	0.0319003	chr1	CNTN2;CNTN2	NM_005076;NM_005076
1482	cg03204322	0.0893206	0.00954154	chr1	SAMD13;SAMD13;SAMD13	NM_001134664;NM_001134663;NM_001010971
1507	cg03256938	0.00732595	0.028061	chr1	FLJ42875;FLJ42875	NR_024371;NR_015440
1544	cg03324123	-0.0301779	0.0165307	chr1	C1orf198;C1orf198	NM_001136494;NM_032800
1556	cg03341469	-0.0516882	0.0428679	chr1	YIPF1	NM_018982
1579	cg03390245	0.027967	0.041575	chr1	NTRK1;INSRR	NM_001007792;NM_014215
1588	cg03422552	-0.0158238	0.0196617	chr1
1592	cg03432338	-0.085559	0.0396429	chr1	FAM89A	NM_198552
1601	cg03442540	0.0327385	0.0338307	chr1	AIDA;C1orf58;AIDA	NM_022831;NM_144695;NM_022831
1624	cg03513309	-0.0129681	0.0190313	chr1
1625	cg03513388	-0.0494659	0.0332515	chr1	PADI3	NM_016233
1630	cg03519967	-0.0319541	0.0305035	chr1	MAN1C1	NM_020379
1635	cg03527274	-0.0211662	0.0327374	chr1	PRDM16;PRDM16	NM_022114;NM_199454
1654	cg03542686	-0.0267862	0.010854	chr1	CAPZB	NM_004930
1658	cg03547581	0.0455814	0.0256908	chr1	NUCKS1	NM_022731
1659	cg03548170	-0.0106289	0.00995336	chr1	NEGR1	NM_173808
1709	cg03636215	0.0115246	0.00997808	chr1	POU3F1	NM_002699
1716	cg03655701	-0.0331079	0.0119625	chr1	C1orf130	NM_001010980
1753	cg03731268	0.0668353	0.0250409	chr1	L1TD1;L1TD1	NM_019079;NM_001164835
1754	cg03731661	-0.0181135	0.00957778	chr1	MYCBP	NM_012333
1760	cg03745013	-0.0155772	0.0259858	chr1	SRGAP2;SRGAP2;SRGAP2	NM_001170637;NM_015326;NM_001042758
1769	cg03762549	0.0177093	0.0462485	chr1	TMEM61	NM_182532
1773	cg03773352	-0.0134162	0.0487903	chr1	UTP11L	NM_016037
1809	cg03885055	-0.0309706	0.0347157	chr1	C1orf144;C1orf144	NM_001114600;NM_015609
1827	cg03937361	-0.0151256	0.0341324	chr1	ROR1;ROR1	NM_005012;NM_001083592
1835	cg03949391	0.0159705	0.0120367	chr1	PTGFR;PTGFR;PTGFR;PTGFR	NM_001039585;NM_001039585;NM_000959;NM_000959
1840	cg03960217	-0.0446833	0.00953676	chr1	LCE2C;LCE2C	NM_178429;NM_178429
1843	cg03969515	0.0121263	0.0291922	chr1
1849	cg03990033	0.027896	0.00825425	chr1	CD34;CD34	NM_001025109;NM_001773
1851	cg03990984	0.00997584	0.0448514	chr1	ERI3;ERI3	NM_024066;NM_024066
1852	cg03991333	0.0453543	0.0468681	chr1	PANK4	NM_018216
1899	cg04100190	0.0939685	0.0341324	chr1	COL9A2	NM_001852
1907	cg04123260	-0.0115001	0.0295303	chr1	SH3BP5L	NM_030645
1910	cg04126810	0.0397862	0.0339363	chr1	KIAA1804	NM_032435
1912	cg04130657	0.0451064	0.0447067	chr1	DEDD;DEDD;DEDD	NM_001039711;NM_032998;NM_001039712
1914	cg04132510	-0.00727762	0.0495407	chr1	PRDM16;PRDM16	NM_022114;NM_199454
1920	cg04139043	-0.0160518	0.0203619	chr1
1931	cg04156383	-0.0185855	0.0164188	chr1	PDE4DIP;PDE4DIP;PDE4DIP;PDE4DIP	NM_022359;NM_014644;NM_001002810;NM_001002812
1958	cg04203508	0.0167184	0.0387752	chr1	ATF3	NM_001030287
1964	cg04213163	-0.0544966	0.0449137	chr1	ITPKB	NM_002221
1970	cg04226804	-0.007649	0.0435714	chr1
1978	cg04245131	-0.0139214	0.04878	chr1
1991	cg04283926	-0.013738	0.0208523	chr1	PPCS;PPCS	NM_001077447;NM_024664
2001	cg04304494	-0.0126239	0.0492307	chr1	MTF1	NM_005955
2005	cg04314247	0.026305	0.0325123	chr1	SLC44A3;SLC44A3;SLC44A3	NM_152369;NM_152369;NM_001114106
2007	cg04315086	-0.00820372	0.0420381	chr1	C1orf159	NM_017891
2021	cg04347016	-0.0147635	0.0172646	chr1	WNT9A	NM_003395
2025	cg04348222	0.047098	0.0398309	chr1	MARCKSL1	NM_023009
2042	cg04392469	0.0151288	0.0341085	chr1	MOSC2	NM_017898
2049	cg04402095	-0.019082	0.0164188	chr1	HDGF;HDGF;HDGF	NM_001126050;NM_001126051;NM_004494
2051	cg04406436	0.0245178	0.0161116	chr1
2056	cg04415297	-0.0171754	0.0246042	chr1
2081	cg04471507	0.0726665	0.0364824	chr1	STMN1;STMN1;STMN1;STMN1	NM_005563;NM_203401;NM_001145454;NM_203399
2087	cg04482628	0.0632017	0.0438752	chr1
2125	cg04563718	-0.024737	0.0434404	chr1	MMEL1	NM_033467
2149	cg04629204	0.0995906	0.0155234	chr1	EXTL1;EXTL1	NM_004455;NM_004455
2209	cg04777112	-0.0753823	0.0213812	chr1
2214	cg04784560	-0.0239252	0.0471693	chr1	DUSP10;DUSP10	NM_144729;NM_007207
2216	cg04789365	0.027744	0.035199	chr1	MAP3K6	NM_004672
2241	cg04844495	-0.0140995	0.0151508	chr1	TOR3A	NM_022371
2246	cg04858586	0.103994	0.0168195	chr1	RABGAP1L;RABGAP1L	NM_001035230;NM_014857
2250	cg04871460	-0.0246174	0.0406061	chr1	PRKCZ	NM_002744
2256	cg04880657	-0.00626699	0.0406006	chr1
2258	cg04886783	-0.0168844	0.0206421	chr1	TMEM52	NM_178545
2262	cg04895202	-0.0197599	0.0154087	chr1
2265	cg04902474	-0.0602218	0.0455417	chr1	KIAA1522	NM_020888
2268	cg04905877	-0.0242026	0.0164188	chr1	NFASC;NFASC;NFASC;NFASC	NM_001005388;NM_001160331;NM_015090;NM_001160332
2287	cg04945350	0.0415621	0.0494818	chr1	TRIM17;TRIM17;TRIM17;TRIM17	NM_016102;NM_001024941;NM_001134855;NM_001024940
2296	cg04975598	-0.017747	0.0143191	chr1	KCNJ10;KCNJ10	NM_002241;NM_002241
2302	cg04987149	0.0155357	0.0122493	chr1	C1orf122;YRDC;C1orf122	NM_198446;NM_024640;NM_001142726
2306	cg04993041	-0.0121286	0.0327224	chr1
2327	cg05042706	-0.0148436	0.0347009	chr1	SLC5A9;SLC5A9	NM_001011547;NM_001135181
2344	cg05087982	-0.0303214	0.0197992	chr1	RAP1GAP;RAP1GAP	NM_002885;NM_001145657
2374	cg05156532	-0.0108909	0.0484664	chr1	MIR320B1	NR_031564
2375	cg05162523	-0.053874	0.0281894	chr1	RUNX3;RUNX3	NM_001031680;NM_004350
2383	cg05172122	0.0331495	0.00946916	chr1	TBX15	NM_152380
2404	cg05228408	-0.0420603	0.0273556	chr1	CLCN6;CLCN6;MTHFR;CLCN6;CLCN6	NM_001286;NM_021736;NM_005957;NM_021737;NM_021735
2419	cg05262877	-0.0166437	0.0364824	chr1	GUCA2A	NM_033553
2423	cg05267756	-0.0140313	0.0467847	chr1
2444	cg05321960	0.0239302	0.0150639	chr1	KIAA0907	NM_014949
2451	cg05335953	-0.0119207	0.0272755	chr1	IGSF21	NM_032880
2457	cg05349042	-0.0147805	0.0479546	chr1	BCL9	NM_004326
2462	cg05364767	-0.0229346	0.0374024	chr1
2465	cg05376267	0.0547948	0.0326707	chr1	LEFTY1	NM_020997
2476	cg05398036	-0.0390932	0.0276037	chr1
2515	cg05508558	-0.0686767	0.0170622	chr1	CR2;CR2	NM_001006658;NM_001877
2544	cg05590196	0.0795034	0.0221695	chr1	KIAA1522	NM_020888
2559	cg05625834	-0.013409	0.0339413	chr1	DENND2C	NM_198459
2563	cg05643453	-0.00716341	0.0449865	chr1	CASQ1	NM_001231
2570	cg05656688	-0.0429772	0.0302555	chr1	RUNX3;RUNX3	NM_001031680;NM_004350
2571	cg05658549	-0.0250111	0.0344746	chr1
2584	cg05721773	-0.0427554	0.0455897	chr1	FAIM3;FAIM3;FAIM3	NM_001142473;NM_001142472;NM_005449
2596	cg05768141	0.0151726	0.0178009	chr1	KCNJ10;KCNJ10	NM_002241;NM_002241
2599	cg05774054	-0.00994511	0.0470178	chr1	KIF26B	NM_018012
2605	cg05790237	-0.0195468	0.0251494	chr1	EFCAB2;EFCAB2;EFCAB2	NR_026587;NM_001143943;NR_026586
2606	cg05791142	-0.0253846	0.0103701	chr1
2607	cg05791506	-0.0126912	0.035557	chr1	UOX;DNASE2B	NR_003927;NM_021233
2610	cg05797178	-0.00615532	0.0479546	chr1	LMOD1	NM_012134
2619	cg05816006	0.0352927	0.0130777	chr1	TSEN15;TSEN15;TSEN15	NM_001127394;NM_052965;NR_023349
2621	cg05817517	-0.0158494	0.0490174	chr1	CSMD2	NM_052896
2622	cg05824755	-0.0540617	0.00748455	chr1	NOTCH2	NM_024408
2661	cg05920182	-0.0339241	0.0362342	chr1
2663	cg05923618	-0.0216185	0.0473672	chr1	KIF21B	NM_017596
2667	cg05929117	0.0592662	0.0476098	chr1	PRKCZ	NM_002744
2675	cg05944661	-0.0460977	0.0219324	chr1
2721	cg06066711	-0.0133207	0.0338141	chr1	KLHL21	NM_014851
2736	cg06106793	-0.0128074	0.046322	chr1	PRCC;PRCC	NM_005973;NM_199416
2740	cg06118571	0.0162793	0.0328723	chr1	KCNAB2;KCNAB2	NM_003636;NM_172130
2755	cg06154570	0.010768	0.0497868	chr1	HEYL	NM_014571
2772	cg06187080	-0.0103356	0.0324043	chr1	SIPA1L2	NM_020808
2774	cg06189265	0.0184022	0.0459911	chr1	GAS5;SNORD76;SNORD75;SNORD77;ZBTB37;SNORD74;ZBTB37	NR_002578;NR_003942;NR_003941;NR_003943;NM_032522;NR_002579;NM_001122770
2775	cg06189708	0.0255665	0.0348717	chr1	ESPN	NM_031475
2779	cg06194536	-0.0168246	0.025719	chr1	MARK1;MARK1	NM_018650;NM_018650
2784	cg06202149	0.0179083	0.0403494	chr1	TP73;TP73;TP73;TP73	NM_001126240;NM_001126242;NM_005427;NM_001126241
2789	cg06214853	-0.021569	0.0205013	chr1
2811	cg06268921	0.0617386	0.0108867	chr1
2839	cg06375148	0.0216748	0.0494481	chr1	C1orf74	NM_152485
2841	cg06378244	-0.0234703	0.0347583	chr1	NBPF1	NM_017940
2853	cg06419268	-0.0488006	0.0265938	chr1	MAPKAPK2;MAPKAPK2	NM_032960;NM_004759
2863	cg06437922	-0.0192117	0.0123845	chr1
2887	cg06497051	0.025128	0.0256925	chr1	TMEM79;TMEM79	NR_026678;NM_032323
2902	cg06527318	-0.0424725	0.0276153	chr1
2949	cg06626232	-0.00729545	0.0470781	chr1	KLF17	NM_173484
2950	cg06626599	-0.0120972	0.0315966	chr1	KCNQ4;KCNQ4	NM_004700;NM_172163
2951	cg06626847	0.0372239	0.0240277	chr1
2954	cg06629702	-0.0170678	0.0326049	chr1
2962	cg06649681	-0.0498858	0.0263091	chr1
2963	cg06650246	0.037109	0.0413965	chr1	MAPKAPK2;MAPKAPK2	NM_032960;NM_004759
2968	cg06656994	0.0114135	0.030589	chr1	FAM163A	NM_173509
2990	cg06712559	-0.0225565	0.04327	chr1	AGRN	NM_198576
3004	cg06747288	-0.0128438	0.0169939	chr1
3007	cg06753883	0.00803974	0.0446447	chr1	MIIP	NM_021933
3010	cg06758644	0.121637	0.023753	chr1	VPS13D;VPS13D	NM_015378;NM_018156
3012	cg06760830	0.0393914	0.0329332	chr1	MOBKL2C;MOBKL2C	NM_145279;NM_201403
3020	cg06772309	0.0200408	0.0269366	chr1	PADI1	NM_013358
3044	cg06819200	-0.0111458	0.0172646	chr1	ECE1;ECE1;ECE1	NM_001113349;NM_001397;NM_001113348
3048	cg06824583	-0.0100237	0.0269892	chr1	ATP8B2;AQP10	NM_001005855;NM_080429
3050	cg06825317	-0.0122165	0.04878	chr1
3054	cg06837449	0.0329151	0.0258912	chr1
3071	cg06875189	-0.0170575	0.0477467	chr1	CEPT1;DRAM2;CEPT1	NM_006090;NM_178454;NM_001007794
3072	cg06878388	0.0280875	0.0365251	chr1	LYPLA2	NM_007260
3079	cg06889348	-0.0222545	0.0447652	chr1
3095	cg06925855	0.037371	0.0286109	chr1
3112	cg06956052	-0.0380975	0.0110096	chr1	ATP1A4	NM_144699
3118	cg06974662	0.0522718	0.0123378	chr1
3123	cg06987672	0.0119487	0.0388263	chr1	CACNA1E	NM_000721
3124	cg06991148	-0.0215301	0.0494537	chr1	PRDM2;PRDM2	NM_012231;NM_001135610
3128	cg07000785	-0.0197877	0.0294826	chr1	GADD45A	NM_001924
3130	cg07010486	-0.0312515	0.0147906	chr1	PLEKHA6	NM_014935
3135	cg07035242	-0.0289161	0.0499663	chr1	UBIAD1	NM_013319
3174	cg07109332	-0.0114958	0.0254892	chr1	C1QA	NM_015991
3182	cg07123038	-0.0256059	0.0273815	chr1	SLC45A1	NM_001080397
3202	cg07145783	-0.0486549	0.0372207	chr1	ITLN1	NM_017625
3204	cg07149609	0.0253685	0.0410669	chr1
3205	cg07150145	-0.0255603	0.0364674	chr1	PDZK1IP1	NM_005764
3219	cg07187808	0.0481249	0.0455929	chr1	KCNJ9	NM_004983
3222	cg07198402	-0.00823255	0.0401612	chr1	OBSCN;OBSCN	NM_052843;NM_001098623
3223	cg07203151	-0.00598265	0.0373475	chr1
3226	cg07204874	0.0400812	0.0267407	chr1
3231	cg07229500	-0.0209894	0.0472543	chr1
3233	cg07235071	-0.0145305	0.0263238	chr1	LYSMD1;LYSMD1;SCNM1	NM_001136543;NM_212551;NM_024041
3234	cg07236666	0.0369074	0.0318222	chr1
3239	cg07245558	-0.0184199	0.00748455	chr1	SCCPDH	NM_016002
3241	cg07251197	0.0143363	0.0267491	chr1
3264	cg07312051	-0.0668326	0.0220508	chr1	FHAD1	NM_052929
3268	cg07318049	0.0152135	0.0332138	chr1	ATPIF1;ATPIF1;ATPIF1	NM_016311;NM_178190;NM_178191
3280	cg07344147	-0.0312064	0.0492559	chr1	IL6R;IL6R;IL6R;IL6R	NM_000565;NM_000565;NM_181359;NM_181359
3282	cg07353685	-0.026251	0.0346284	chr1	S100A2	NM_005978
3294	cg07377341	0.017852	0.0263093	chr1	IGSF8	NM_052868
3297	cg07379893	-0.0218964	0.0235862	chr1	IGSF9;IGSF9	NM_020789;NM_001135050
3305	cg07392838	-0.0124893	0.0173267	chr1	LPPR5;LPPR5	NM_001010861;NM_001037317
3308	cg07398558	0.0797202	0.0399278	chr1	TRNAU1AP;TRNAU1AP	NR_003109;NM_017846
3310	cg07400628	-0.0137593	0.0181055	chr1	DNAJC11;DNAJC11	NM_018198;NM_018198
3316	cg07423997	-0.0419058	0.0325123	chr1
3339	cg07478791	-0.0238293	0.0292252	chr1	SERINC2	NM_178865
3340	cg07479750	-0.0263002	0.00957778	chr1	PRAMEF11	NM_001146344
3352	cg07502417	0.0362923	0.0158792	chr1	AGT	NM_000029
3369	cg07557690	0.0196448	0.0142589	chr1	TGFBR3	NM_003243
3375	cg07568588	-0.024569	0.0392947	chr1
3377	cg07569918	0.105579	0.0491764	chr1	LPGAT1	NM_014873
3380	cg07571745	-0.0328708	0.0277133	chr1	LCK	NM_005356
3384	cg07582955	0.0550328	0.0230773	chr1	KLHL17	NM_198317
3390	cg07591519	0.0417619	0.0419662	chr1
3404	cg07625783	-0.0493866	0.0181736	chr1	SLAMF8;SLAMF8	NM_020125;NM_020125
3429	cg07688613	-0.0170659	0.0296849	chr1	INTS3	NM_023015
3441	cg07706695	-0.045626	0.0389632	chr1
3446	cg07719898	0.0223648	0.0497496	chr1
3477	cg07780762	-0.0462698	0.0146242	chr1
3480	cg07789132	0.0156369	0.0421382	chr1
3481	cg07790615	0.0276028	0.0408344	chr1	RYR2	NM_001035
3483	cg07792529	-0.0172957	0.0326332	chr1	NR5A2;NR5A2	NM_205860;NM_003822
3484	cg07794409	-0.0515295	0.025903	chr1
3501	cg07833104	-0.0188322	0.012707	chr1	CELSR2	NM_001408
3547	cg07946633	0.0279222	0.037341	chr1	FLJ42875;PRDM16;FLJ42875;PRDM16	NR_024371;NM_199454;NR_015440;NM_022114
3548	cg07948875	0.062556	0.0392913	chr1	NME7;NME7	NM_013330;NM_197972
3552	cg07967717	0.017835	0.0388263	chr1	CNR2	NM_001841
3575	cg08029603	-0.00935922	0.0476245	chr1	FLJ39609	NR_026874
3580	cg08036553	-0.0328316	0.0384772	chr1
3609	cg08104733	-0.0108686	0.0443568	chr1
3611	cg08106961	-0.033865	0.0351131	chr1	GRIK3	NM_000831
3617	cg08132177	-0.0210682	0.030751	chr1
3619	cg08133525	-0.00631409	0.0307892	chr1
3621	cg08133848	-0.00768663	0.042556	chr1
3623	cg08138435	-0.0332027	0.0290867	chr1	BATF3	NM_018664
3625	cg08139234	-0.0397499	0.0265514	chr1	EPB41;EPB41;EPB41;EPB41;EPB41;EPB41	NM_203342;NM_203343;NM_004437;NM_001166006;NM_001166007;NM_001166005
3631	cg08146495	0.0155838	0.0329735	chr1	C1orf14	NM_030933
3633	cg08153752	-0.0162491	0.0496524	chr1	PANK4	NM_018216
3635	cg08160462	0.0305954	0.0101615	chr1
3680	cg08274380	0.0148638	0.0335262	chr1	GPSM2	NM_013296
3683	cg08274821	-0.0167721	0.0424579	chr1	PTPN14	NM_005401
3718	cg08366126	-0.0153622	0.0447265	chr1	FUCA1	NM_000147
3756	cg08458637	-0.0365635	0.04981	chr1	TSNAX-DISC1;TSNAX-DISC1;TSNAX-DISC1;TSNAX-DISC1;TSNAX-DISC1;TSNAX-DISC1;TSNAX-DISC1;TSNAX-DISC1	NR_028398;NR_028394;NR_028397;NR_028395;NR_028399;NR_028393;NR_028400;NR_028396
3780	cg08540100	0.0236539	0.0363952	chr1
3840	cg08709672	-0.0337775	0.00700836	chr1	AVPR1B;AVPR1B	NM_000707;NM_000707
3845	cg08715595	0.0501751	0.00827796	chr1	RNF220	NM_018150
3895	cg08862373	-0.0461869	0.030659	chr1
3899	cg08876103	-0.0423147	0.016621	chr1	MACF1	NM_012090
3905	cg08892370	0.0159758	0.0257114	chr1	MGC12982	NR_026878
3906	cg08894273	0.08444	0.0355067	chr1
3911	cg08901593	0.0769651	0.0114562	chr1	FAM5B	NM_021165
3914	cg08916374	-0.0531757	0.0295954	chr1	POLR3GL;ANKRD34A	NM_032305;NM_001039888
3916	cg08922361	0.0637898	0.0256925	chr1
3920	cg08933467	-0.0335321	0.0413197	chr1	FCRL1;FCRL1;FCRL1	NM_001159398;NM_052938;NM_001159397
3921	cg08937102	-0.0592633	0.0181293	chr1	NADK	NM_023018
3944	cg09011945	0.00889189	0.0306208	chr1	MAPKAPK2;MAPKAPK2	NM_004759;NM_032960
3985	cg09107315	0.0144114	0.0328189	chr1	GIPC2	NM_017655
3986	cg09118625	0.0388522	0.0323294	chr1	DIRAS3	NM_004675
3991	cg09136878	0.125605	0.0379067	chr1
3996	cg09144480	-0.0399563	0.0246835	chr1
4012	cg09186051	-0.0142674	0.02902	chr1	DISC1;DISC1;DISC1;DISC1;DISC1;DISC1;DISC1;TSNAX-DISC1;DISC1;DISC1;DISC1;DISC1	NM_001012959;NM_018662;NM_001164539;NM_001012957;NM_001164541;NM_001164540;NM_001164542;NR_028393;NM_001164538;NM_001164537;NM_001164546;NM_001164547
4021	cg09222123	0.0391883	0.0153788	chr1	GTF2B	NM_001514
4025	cg09236098	-0.0227061	0.0339704	chr1	DVL1	NM_004421
4027	cg09243533	-0.0193968	0.0369394	chr1	IFFO2	NM_001136265
4034	cg09259409	-0.0140681	0.0392154	chr1	OR2W5	NM_001004698
4058	cg09327855	-0.0233287	0.0297373	chr1	NID1	NM_002508
4069	cg09354294	-0.0193482	0.0110096	chr1	GNG12	NM_018841
4071	cg09360041	-0.0146773	0.017134	chr1	ABCA4	NM_000350
4110	cg09502149	-0.047023	0.0123482	chr1	SLC2A1	NM_006516
4111	cg09509183	0.0203012	0.0271735	chr1	IRF6	NM_006147
4120	cg09548241	-0.00872428	0.0407709	chr1
4192	cg09755102	-0.0220545	0.0480257	chr1	S100PBP;YARS;YARS;S100PBP	NM_022753;NM_003680;NM_003680;NM_001017406
4199	cg09767550	-0.0176689	0.0417069	chr1
4211	cg09793172	0.0290728	0.0160528	chr1	KIF17;KIF17	NM_020816;NM_001122819
4215	cg09804380	0.0136417	0.0255622	chr1	PDPN;PDPN;PDPN;PDPN	NM_001006624;NM_001006625;NM_006474;NM_198389
4217	cg09809806	-0.0140331	0.047121	chr1	ALG6	NM_013339
4229	cg09851245	-0.0159526	0.0257114	chr1	LOC645676;ASH1L	NR_027023;NM_018489
4247	cg09890699	0.0261287	0.0368	chr1	SSBP3;SSBP3;SSBP3	NM_001009955;NM_018070;NM_145716
4254	cg09914444	-0.0125878	0.0491238	chr1	DMBX1;DMBX1	NM_172225;NM_147192
4263	cg09938479	0.0674985	0.0167291	chr1
4264	cg09941208	-0.013378	0.0266289	chr1	PTCH2;PTCH2	NM_001166292;NM_003738
4268	cg09952946	-0.0165367	0.0466752	chr1	BATF3	NM_018664
4278	cg09978023	-0.0166433	0.0461463	chr1	RGS13;RGS13	NM_002927;NM_144766
4313	cg10055277	-0.0346598	0.0347641	chr1	FHAD1	NM_052929
4316	cg10064400	-0.0168718	0.00888198	chr1	ZNF326;LOC492303;ZNF326	NM_182975;NR_002830;NM_182976
4377	cg10204695	-0.0358401	0.006935	chr1	WDR77;ATP5F1	NM_024102;NM_001688
4384	cg10219850	-0.0283775	0.0214734	chr1	KCNK2;KCNK2;KCNK2	NM_014217;NM_001017425;NM_001017424
4386	cg10221746	-0.0116208	0.0241073	chr1
4388	cg10236596	-0.0302612	0.0205075	chr1
4418	cg10313167	-0.0213559	0.0349172	chr1	FCRL5	NM_031281
4420	cg10317638	-0.0104099	0.0234041	chr1	TMEM125	NM_144626
4425	cg10324224	-0.0351028	0.0399052	chr1	TTC13;TTC13;ARV1	NM_024525;NM_001122835;NM_022786
4426	cg10325600	-0.0120953	0.0101846	chr1	SLC30A10;SLC30A10	NM_018713;NM_018713
4434	cg10375409	-0.036571	0.0490348	chr1	CD247;CD247	NM_198053;NM_000734
4435	cg10375954	-0.0529313	0.0263238	chr1	ACOT7;ACOT7;ACOT7;ACOT7	NM_181864;NM_181865;NM_181866;NM_007274
4466	cg10444683	0.0750495	0.0113863	chr1	PRDM2;PRDM2	NM_012231;NM_001135610
4491	cg10501210	-0.00646304	0.0245674	chr1
4496	cg10504365	0.0491666	0.0120199	chr1	TRIM67	NM_001004342
4502	cg10511357	-0.028047	0.0161536	chr1	CAMTA1	NM_015215
4506	cg10512748	-0.0136748	0.0309121	chr1	SNHG3-RCC1;RCC1;SNHG3-RCC1;RCC1;RCC1;SNHG3-RCC1	NR_030725;NM_001048195;NR_030726;NM_001269;NM_001048194;NM_001048199
4519	cg10555106	0.0209713	0.0310467	chr1	LOC388588	NM_001163724
4529	cg10585733	0.0126471	0.0499663	chr1
4546	cg10634619	0.0474545	0.0264708	chr1	KIAA0495;KIAA0495	NM_207306;NM_207306
4592	cg10798745	-0.0484124	0.038418	chr1	CD160	NM_007053
4596	cg10811945	-0.00858926	0.0438924	chr1	SH2D2A;SH2D2A;NTRK1;SH2D2A;SH2D2A;SH2D2A	NM_001161443;NM_001161442;NM_001007792;NM_003975;NM_001161441;NM_001161444
4601	cg10829458	0.0293594	0.0452187	chr1	FAM78B	NM_001017961
4644	cg10952918	-0.0352741	0.0497123	chr1	RASSF5;RASSF5;RASSF5	NM_182663;NM_182665;NM_182664
4645	cg10953312	-0.00741556	0.031291	chr1
4650	cg10961249	-0.00913469	0.0470283	chr1	PLCH2	NM_014638
4657	cg10971346	-0.0224738	0.0295303	chr1	PIGV;PIGV	NM_017837;NM_017837
4666	cg10993488	-0.01176	0.0387567	chr1	PLA2G2A;PLA2G2A;PLA2G2A;PLA2G2A	NM_001161728;NM_000300;NM_001161729;NM_001161727
4693	cg11071912	-0.0598214	0.0297075	chr1
4694	cg11072119	0.013195	0.0417292	chr1	RAP1GAP;RAP1GAP;RAP1GAP	NM_001145658;NM_001145657;NM_002885
4717	cg11161846	0.0467861	0.00948034	chr1	F11R	NM_016946
4718	cg11161882	-0.0243662	0.0122368	chr1	TRIM11	NM_145214
4733	cg11205296	-0.00858752	0.0455071	chr1	DNAJC8	NM_014280
4738	cg11211259	0.0176674	0.0474775	chr1	MTX1;THBS3;MTX1	NM_198883;NM_007112;NM_002455
4740	cg11214576	-0.0267808	0.0102095	chr1	LDLRAP1	NM_015627
4749	cg11240043	-0.0134658	0.0287469	chr1	PLA2G2E	NM_014589
4751	cg11251827	0.00659027	0.0376504	chr1	HSPA6	NM_002155
4769	cg11298786	-0.0166393	0.0234411	chr1	WNT3A	NM_033131
4774	cg11314684	-0.0746209	0.00497416	chr1	AKT3;AKT3	NM_005465;NM_181690
4786	cg11332336	-0.0164942	0.040942	chr1	IPO13	NM_014652
4788	cg11336061	-0.00970246	0.0250874	chr1	RUNX3;RUNX3	NM_001031680;NM_004350
4789	cg11336539	-0.03482	0.0311041	chr1	GMEB1;GMEB1	NM_006582;NM_024482
4792	cg11338128	-0.0113705	0.0456318	chr1	ST6GALNAC5	NM_030965
4796	cg11345352	-0.0236183	0.0410775	chr1
4809	cg11393848	-0.0337723	0.032048	chr1	C1QC;C1QC	NM_001114101;NM_172369
4813	cg11401257	-0.0308393	0.0100812	chr1	ITPKB	NM_002221
4856	cg11496569	-0.0508888	0.0203147	chr1	AKT3;AKT3	NM_005465;NM_181690
4858	cg11502921	-0.0188014	0.0308671	chr1
4867	cg11518938	-0.0265621	0.0282878	chr1
4868	cg11521998	0.0290839	0.0207459	chr1
4887	cg11573219	0.0328416	0.0147665	chr1	HCRTR1	NM_001525
4930	cg11650925	-0.0269453	0.0127852	chr1
4950	cg11694026	-0.0450593	0.0163274	chr1
4952	cg11697038	0.105969	0.0210275	chr1	AHDC1	NM_001029882
4964	cg11717564	0.0422127	0.0294826	chr1	RXRG;RXRG	NM_006917;NM_001009598
4968	cg11726288	0.0425313	0.0206931	chr1	CLCN6	NM_001286
4969	cg11726631	-0.0263788	0.0356324	chr1	AGRN	NM_198576
4985	cg11769086	0.011677	0.0470351	chr1	INTS3	NM_023015
4995	cg11796313	-0.0208352	0.0368343	chr1
5007	cg11818031	-0.0145569	0.0315302	chr1	HSPG2	NM_005529
5008	cg11819201	-0.0238595	0.0152489	chr1	FMO6P	NR_002601
5015	cg11835068	0.0516655	0.0286109	chr1	AJAP1;AJAP1	NM_018836;NM_001042478
5016	cg11837749	-0.0241019	0.0368011	chr1	ACOT11;ACOT11	NM_015547;NM_147161
5060	cg11946666	0.023219	0.0378557	chr1	PRDM16;PRDM16	NM_022114;NM_199454
5063	cg11949335	0.115077	0.0162075	chr1	TTC22	NM_001114108
5065	cg11953254	0.0502994	0.0373159	chr1
5069	cg11967292	0.0242971	0.0233529	chr1	EPHX1	NM_001136018
5073	cg11969144	-0.0146951	0.0325838	chr1	LMO4	NM_006769
5078	cg11979420	-0.0180937	0.0457636	chr1
5081	cg11993086	0.0131952	0.0209618	chr1	MRPL20	NM_017971
5121	cg12080717	-0.0169157	0.00951689	chr1	OR11L1	NM_001001959
5122	cg12080882	0.114746	0.0278698	chr1	TMEM167B	NM_020141
5127	cg12092579	-0.0273561	0.0329332	chr1	RASAL2;RASAL2	NM_004841;NM_170692
5132	cg12112929	0.010143	0.0268067	chr1	GPR3	NM_005281
5138	cg12132508	-0.0118171	0.0100492	chr1	RRP15	NM_016052
5139	cg12137247	-0.02608	0.0452408	chr1	C1orf159	NM_017891
5154	cg12205230	0.0604486	0.0129821	chr1	TPM3	NM_152263
5156	cg12210914	0.0897347	0.0473672	chr1
5170	cg12278474	-0.0727271	0.0288261	chr1
5176	cg12302119	-0.0117422	0.0477535	chr1	NEGR1	NM_173808
5179	cg12304930	-0.032293	0.0374832	chr1	C1orf146	NM_001012425
5205	cg12385729	0.0615159	0.0414085	chr1
5206	cg12386336	-0.0194576	0.0143277	chr1
5220	cg12426870	-0.0162699	0.0479957	chr1
5233	cg12468315	-0.0104559	0.0284335	chr1	MEGF6	NM_001409
5267	cg12551813	-0.0187347	0.0388363	chr1	CAMSAP1L1	NM_203459
5284	cg12598340	0.0297265	0.0250874	chr1	TMEM54	NM_033504
5290	cg12622721	-0.00877718	0.0428042	chr1
5301	cg12656815	-0.0412748	0.0378049	chr1	BCAN	NM_021948
5303	cg12661427	-0.0123712	0.0329957	chr1	DPH2;DPH2	NM_001039589;NM_001384
5314	cg12688265	-0.0153123	0.0463198	chr1	GBAP1	NR_002188
5317	cg12703825	-0.0106549	0.0478905	chr1	TMEM82	NM_001013641
5326	cg12736206	-0.00974645	0.0419856	chr1	ZC3H11A	NM_014827
5331	cg12753303	-0.0173483	0.0436346	chr1
5335	cg12764034	0.0262554	0.00968252	chr1	LHX8	NM_001001933
5342	cg12796186	-0.0153874	0.0294826	chr1	PGD	NM_002631
5347	cg12804010	0.013634	0.0146817	chr1	SYT6	NM_205848
5359	cg12869659	0.0460593	0.00707314	chr1	ZNF238	NM_205768
5366	cg12891678	-0.0282981	0.0454075	chr1
5368	cg12898694	-0.00627173	0.0449692	chr1	TSNAX-DISC1;TSNAX-DISC1;TSNAX-DISC1;TSNAX;TSNAX-DISC1;TSNAX-DISC1;TSNAX-DISC1;TSNAX-DISC1;TSNAX-DISC1	NR_028398;NR_028394;NR_028397;NM_005999;NR_028395;NR_028399;NR_028393;NR_028400;NR_028396
5430	cg13066016	-0.0149864	0.0343625	chr1
5433	cg13069100	0.0828517	0.0215887	chr1	ADAM15;EFNA4;ADAM15;ADAM15;EFNA4;ADAM15;ADAM15;EFNA4;ADAM15	NM_207197;NM_182689;NM_207195;NM_207194;NM_182690;NM_207191;NM_207196;NM_005227;NM_003815
5447	cg13101705	-0.0246191	0.0371044	chr1	NMNAT2;NMNAT2	NM_170706;NM_015039
5456	cg13148469	-0.0336833	0.0332138	chr1	TAF12;TAF12	NM_001135218;NM_005644
5461	cg13174735	-0.0303259	0.0334116	chr1
5464	cg13183298	0.0245975	0.0398857	chr1
5467	cg13191195	-0.0285502	0.0320401	chr1
5470	cg13199178	-0.00907066	0.0312189	chr1
5473	cg13203239	0.0449503	0.00951689	chr1	MATN1	NM_002379
5479	cg13210595	-0.0301089	0.0176144	chr1	CD247;CD247	NM_198053;NM_000734
5491	cg13246206	0.0130941	0.0315973	chr1
5510	cg13300273	0.0575221	0.0346168	chr1	GPR25	NM_005298
5543	cg13385114	-0.0399385	0.0228326	chr1	TMEM201;TMEM201	NM_001130924;NM_001010866
5544	cg13386070	-0.00823176	0.0218804	chr1	TNN	NM_022093
5550	cg13398782	-0.0173798	0.00957778	chr1	E2F2;E2F2	NM_004091;NM_004091
5561	cg13423770	-0.0367622	0.0341031	chr1	RHBG;RHBG	NR_026549;NM_020407
5568	cg13430819	-0.0362446	0.0378095	chr1
5576	cg13460934	-0.0112881	0.0214731	chr1	PRDM16;PRDM16	NM_022114;NM_199454
5578	cg13471424	0.0224222	0.0371519	chr1
5614	cg13554744	-0.0236428	0.0270105	chr1	CSRP1;CSRP1	NM_004078;NM_001144773
5679	cg13678973	0.0206472	0.035134	chr1	ELAVL4	NM_001144777
5683	cg13686807	-0.0107526	0.0162045	chr1
5685	cg13687998	0.0165712	0.0465337	chr1	CCDC21	NM_022778
5687	cg13689831	-0.0298003	0.0404985	chr1	CABC1	NM_020247
5718	cg13758666	-0.0136164	0.0406978	chr1
5730	cg13782866	-0.0610581	0.0325123	chr1	TSNAX-DISC1;DISC1;DISC1;DISC1;DISC1;TSNAX-DISC1;DISC1;DISC1;TSNAX-DISC1;DISC1;TSNAX-DISC1;DISC1;DISC1;TSNAX-DISC1;DISC1;DISC1;DISC1;DISC1;DISC1;DISC1;DISC1;DISC1;DISC1;TSNAX-DISC1;TSNAX-DISC1;DISC1;DISC1;DISC1;TSNAX-DISC1;DISC1;DISC1	NR_028394;NM_001164556;NM_001164538;NM_018662;NM_001164555;NR_028397;NM_001164554;NM_001164552;NR_028393;NM_001164537;NR_028400;NM_001164551;NM_001164539;NR_028398;NM_001164540;NM_001164542;NM_001164548;NM_001012959;NM_001164547;NM_001164550;NM_001164546;NM_001012957;NM_001012958;NR_028399;NR_028395;NM_001164545;NM_001164549;NM_001164544;NR_028396;NM_001164553;NM_001164541
5731	cg13785123	0.0289756	0.0461102	chr1	ENO1	NM_001428
5758	cg13871826	0.049076	0.0143277	chr1	CYR61;DDAH1	NM_001554;NM_001134445
5760	cg13875033	-0.0437944	0.0444923	chr1	PRDM16;PRDM16	NM_022114;NM_199454
5761	cg13879177	-0.0300596	0.029264	chr1	PADI6	NM_207421
5771	cg13896157	-0.0289942	0.0376439	chr1	C1orf172	NM_152365
5773	cg13907959	-0.0175378	0.01045	chr1	HIST3H2BB;HIST3H2A;HIST3H2A	NM_175055;NM_033445;NM_033445
5784	cg13932286	-0.0719262	0.043437	chr1	HIPK1;HIPK1	NM_152696;NM_198268
5789	cg13938959	-0.036636	0.0257114	chr1
5792	cg13946806	-0.0106717	0.0257207	chr1
5800	cg13968398	-0.0162297	0.0343179	chr1	MTR	NM_000254
5819	cg14013220	0.0164292	0.0361354	chr1	FAM36A;FAM36A	NM_198076;NM_198076
5827	cg14030836	-0.0410208	0.0210495	chr1	PRDM16;PRDM16	NM_022114;NM_199454
5829	cg14032218	-0.0170753	0.0489037	chr1	METTL13;METTL13;METTL13	NM_015935;NM_014955;NM_001007239
5830	cg14039246	0.0798767	0.0356008	chr1	ECHDC2	NM_018281
5848	cg14076231	0.0482134	0.0412428	chr1
5854	cg14097568	-0.073137	0.0158372	chr1
5876	cg14149172	-0.0292653	0.0488729	chr1	PI4KB	NM_002651
5900	cg14204586	-0.0486257	0.0206421	chr1	ARHGEF2;ARHGEF2;ARHGEF2	NM_004723;NM_001162383;NM_001162384
5908	cg14212983	-0.0254757	0.0335298	chr1	RAP1GAP;RAP1GAP	NM_002885;NM_001145657
5913	cg14218629	-0.0174802	0.0470283	chr1
5993	cg14413378	-0.00875147	0.0454024	chr1	FAM20B	NM_014864
5995	cg14415160	0.0397018	0.00839108	chr1
6006	cg14448116	-0.00869772	0.0300306	chr1	NDUFS2;ADAMTS4	NM_004550;NM_005099
6017	cg14476101	0.0415228	0.0214947	chr1	PHGDH	NM_006623
6038	cg14524955	-0.0133609	0.0226361	chr1	PADI1;PADI1	NM_013358;NM_013358
6042	cg14528386	0.0423068	0.0125729	chr1
6115	cg14661383	-0.0245683	0.0263717	chr1	OBSCN;OBSCN	NM_052843;NM_001098623
6156	cg14780068	-0.0150352	0.0106264	chr1	NAV1;NAV1	NM_001167738;NM_020443
6157	cg14783567	-0.0292662	0.00631987	chr1
6167	cg14824901	0.0118496	0.0391002	chr1	G0S2	NM_015714
6174	cg14843670	-0.0113727	0.016233	chr1	PCNXL2	NM_014801
6175	cg14843772	-0.0182064	0.0490105	chr1	DR1	NM_001938
6179	cg14853341	-0.0314875	0.0139695	chr1	KCNK1	NM_002245
6218	cg14960316	-0.00992978	0.0378933	chr1	TMEM53	NM_024587
6225	cg14978637	-0.00716475	0.0268018	chr1	EDN2	NM_001956
6229	cg14994947	-0.0321213	0.0400079	chr1
6257	cg15093248	-0.0213081	0.0265348	chr1	ESPNP	NR_026567
6260	cg15102821	-0.0324551	0.0331104	chr1	CALML6	NM_138705
6261	cg15114013	0.046925	0.0239706	chr1	NFYC;NFYC;LOC100130557;NFYC;NFYC;NFYC	NM_014223;NM_001142590;NR_024567;NM_001142588;NM_001142589;NM_001142587
6262	cg15114107	-0.0200244	0.0421038	chr1	GUK1;GUK1	NM_001159390;NM_000858
6270	cg15131146	-0.0287332	0.0233335	chr1	MAN1C1	NM_020379
6274	cg15136975	0.0752823	0.0145251	chr1	CAPZB	NM_004930
6276	cg15152789	-0.0489787	0.0388263	chr1
6277	cg15157455	0.0270367	0.0220883	chr1	HIST2H2BF	NM_001024599
6291	cg15198788	-0.00642622	0.0338307	chr1	SERINC2	NM_178865
6297	cg15209908	-0.0124574	0.049003	chr1	CROCC	NM_014675
6368	cg15388210	-0.0201019	0.0210854	chr1	KIAA0319L	NM_024874
6391	cg15462232	-0.0155129	0.022845	chr1	FOXD3	NM_012183
6392	cg15462736	-0.00743632	0.0363564	chr1	RASAL2;RASAL2	NM_004841;NM_170692
6393	cg15464821	0.0183553	0.0431099	chr1
6409	cg15513743	0.0222315	0.0455535	chr1	TBX15	NM_152380
6413	cg15525053	-0.01613	0.0146639	chr1
6426	cg15555335	-0.0166422	0.0159127	chr1	OTUD3	NM_015207
6429	cg15557758	-0.0168247	0.0288203	chr1
6430	cg15558527	0.036751	0.0141066	chr1	CLCNKB;CLCNKB	NM_001165945;NM_000085
6437	cg15575683	0.0262061	0.0406061	chr1
6439	cg15584435	0.0920277	0.016451	chr1	SEP15;HS2ST1;SEP15;HS2ST1	NM_004261;NM_001134492;NM_203341;NM_012262
6445	cg15605096	-0.0134474	0.0209618	chr1	TAS1R2	NM_152232
6455	cg15628959	0.0394512	0.0429651	chr1	THEM4	NM_053055
6461	cg15654264	-0.0283118	0.0348878	chr1	RPRD2	NM_015203
6467	cg15673994	0.0307425	0.0215804	chr1	TNRC4	NM_007185
6472	cg15691841	-0.0183216	0.0318126	chr1	ZNF687	NM_020832
6474	cg15696662	0.0293996	0.0457883	chr1	C1orf190;POMGNT1	NM_001013615;NR_024332
6484	cg15713103	0.0194493	0.0210415	chr1
6486	cg15717853	-0.0318337	0.019283	chr1	RGS16	NM_002928
6489	cg15728320	-0.0172114	0.0258395	chr1
6521	cg15817705	-0.0411382	0.00402251	chr1
6523	cg15820574	0.0230898	0.0234612	chr1
6526	cg15831613	-0.0184199	0.0076327	chr1	ATF3;ATF3;ATF3	NM_001674;NM_001040619;NM_001030287
6554	cg15895132	-0.0263364	0.0372125	chr1
6557	cg15897102	-0.0168929	0.0271735	chr1
6576	cg15961455	0.0458547	0.027952	chr1
6580	cg15975824	0.0336776	0.0478015	chr1	MAGI3;MAGI3	NM_001142782;NM_152900
6590	cg16000683	-0.0121157	0.0368483	chr1	CSMD2	NM_052896
6592	cg16009787	0.0269141	0.0289676	chr1	MOV10;MOV10	NM_001130079;NM_020963
6593	cg16015205	-0.0226213	0.025791	chr1	SH3BGRL3	NM_031286
6594	cg16018474	0.0442614	0.0417842	chr1
6595	cg16021159	-0.0131885	0.0455071	chr1	PRKAA2	NM_006252
6601	cg16040306	-0.0339162	0.0169867	chr1
6606	cg16049283	-0.0487156	0.0320401	chr1	ACOT7;ACOT7;ACOT7;ACOT7	NM_181864;NM_181865;NM_181866;NM_007274
6639	cg16125989	-0.0196705	0.0195271	chr1
6640	cg16127759	0.0206689	0.0155234	chr1	ALX3	NM_006492
6653	cg16165294	-0.0157165	0.0443898	chr1	S100A11	NM_005620
6659	cg16171105	-0.0182837	0.0428042	chr1
6660	cg16171860	-0.00884162	0.0455311	chr1	RCC2;RCC2	NM_018715;NM_001136204
6679	cg16227703	-0.0196733	0.0155276	chr1	UTP11L	NM_016037
6685	cg16246545	0.0571963	0.00968252	chr1	PHGDH	NM_006623
6700	cg16273215	-0.0158706	0.0447898	chr1	EFNA1;EFNA1	NM_182685;NM_004428
6707	cg16291276	0.0381807	0.0129582	chr1	CD34;CD34	NM_001025109;NM_001773
6708	cg16294641	-0.018091	0.0426293	chr1
6728	cg16352072	-0.0166367	0.00760999	chr1	PLEKHN1;PLEKHN1	NM_032129;NM_001160184
6732	cg16361876	-0.0344008	0.0234013	chr1	LCE2D;LCE2D	NM_178430;NM_178430
6743	cg16391608	-0.0240433	0.0117092	chr1	SEMA4A	NM_022367
6748	cg16402387	-0.0125639	0.0250086	chr1	ZNF648	NM_001009992
6750	cg16410706	-0.0193284	0.0459911	chr1	BATF3	NM_018664
6753	cg16416987	0.044596	0.0204862	chr1	THBS3;MTX1;MTX1	NM_007112;NM_198883;NM_002455
6760	cg16427752	-0.026651	0.0338307	chr1	MSH4	NM_002440
6795	cg16511454	-0.0338136	0.049947	chr1	LOC148709	NR_002929
6801	cg16523380	-0.0157681	0.0472152	chr1	CASZ1;CASZ1	NM_017766;NM_001079843
6803	cg16527057	0.0468763	0.0440082	chr1	ETV3L	NM_001004341
6809	cg16540768	0.0209928	0.00748455	chr1	TMEM56	NM_152487
6813	cg16552271	0.0316523	0.0483105	chr1	KIAA1026;KIAA1026;KIAA1026;KIAA1026;KIAA1026	NM_201628;NM_015209;NM_001018001;NM_001018000;NM_001017999
6830	cg16582344	-0.0230868	0.00828091	chr1	ARF1;ARF1;ARF1;ARF1	NM_001024227;NM_001658;NM_001024226;NM_001024228
6838	cg16593910	0.061129	0.0109721	chr1	CSMD2	NM_052896
6841	cg16598600	0.0305266	0.0296724	chr1
6843	cg16600889	-0.0162493	0.0447457	chr1	SLC25A24	NM_013386
6877	cg16695380	0.0518558	0.0265345	chr1	MAD2L2	NM_001127325
6883	cg16717773	0.0832683	0.0123541	chr1	GBA;GBA;GBA;GBA;GBA	NM_001005742;NM_001005750;NM_000157;NM_001005741;NM_001005749
6886	cg16724557	0.0252359	0.0387335	chr1	SNHG12;SNORA44;SNORA16A;SNORA61	NR_024127;NR_002976;NR_003035;NR_002987
6929	cg16879052	0.0651079	0.0467847	chr1	KCNJ9	NM_004983
6967	cg17013990	0.0605993	0.014966	chr1	DEDD;DEDD;DEDD	NM_032998;NM_001039711;NM_001039712
6972	cg17033287	-0.0302315	0.0350789	chr1	PRDM16;PRDM16	NM_022114;NM_199454
6978	cg17043722	-0.0499468	0.0490865	chr1
6989	cg17081645	0.0274827	0.0383015	chr1	C1orf144;C1orf144	NM_001114600;NM_015609
6993	cg17091266	0.0746947	0.0448983	chr1	TMEM52;TMEM52	NM_178545;NM_178545
6996	cg17106536	-0.0241908	0.0380575	chr1	CABC1	NM_020247
6998	cg17107840	-0.0186463	0.0151396	chr1	MAP3K6	NM_004672
7006	cg17132079	0.0502648	0.0380548	chr1	MXRA8	NM_032348
7007	cg17142371	0.00972069	0.0273441	chr1	FDPS;FDPS;FDPS	NM_001135822;NM_001135821;NM_002004
7009	cg17146111	-0.0224074	0.032048	chr1	PRPF38A;ORC1L	NM_032864;NM_004153
7014	cg17163527	-0.0871565	0.00858623	chr1	MEGF6	NM_001409
7016	cg17167920	-0.0129975	0.0376665	chr1	NUP210L;NUP210L;NUP210L;NUP210L	NM_001159484;NM_207308;NM_207308;NM_001159484
7030	cg17213946	-0.0215984	0.042881	chr1	PTPRF;PTPRF	NM_002840;NM_130440
7035	cg17225340	-0.0555115	0.0457834	chr1	DAB1	NM_021080
7054	cg17326555	0.0396937	0.0169867	chr1
7100	cg17453374	-0.0257446	0.00434951	chr1	DIO1;DIO1;DIO1;DIO1;DIO1;DIO1;DIO1;DIO1	NM_000792;NM_001039716;NM_001039716;NM_213593;NM_213593;NM_001039715;NM_001039715;NM_000792
7109	cg17471939	0.131241	0.0133637	chr1	TP73	NM_005427
7116	cg17480076	0.0231932	0.0483465	chr1
7120	cg17488939	-0.0111333	0.0311308	chr1
7122	cg17491850	0.0253756	0.0391677	chr1	DAB1	NM_021080
7124	cg17493193	-0.00693062	0.0403494	chr1	PDIK1L;PDIK1L;PDIK1L	NM_152835;NR_026686;NR_026685
7125	cg17495046	-0.0105313	0.0434096	chr1	PRKCZ;PRKCZ	NM_002744;NM_001033581
7126	cg17497824	-0.0159386	0.023218	chr1	PRKCZ;PRKCZ	NM_002744;NM_001033581
7158	cg17594670	0.109682	0.0299887	chr1
7159	cg17598574	-0.0356567	0.00748455	chr1	RAP1A;RAP1A	NM_002884;NM_001010935
7161	cg17602903	-0.0275989	0.0207209	chr1
7198	cg17720021	-0.0141028	0.0357273	chr1	IGSF21	NM_032880
7204	cg17736671	-0.0598006	0.00888198	chr1
7207	cg17744604	0.134932	0.00997808	chr1	IL10	NM_000572
7221	cg17799654	-0.0190763	0.0338307	chr1	AP4B1	NM_006594
7229	cg17826013	-0.011078	0.034556	chr1	HES2	NM_019089
7237	cg17840367	-0.0187383	0.0431618	chr1
7240	cg17849972	-0.00534518	0.0442099	chr1	MYOG	NM_002479
7245	cg17861161	-0.0284865	0.0188202	chr1	PRDM16;PRDM16	NM_022114;NM_199454
7251	cg17875988	-0.0207976	0.0462485	chr1	CAMTA1	NM_015215
7257	cg17888232	-0.00644743	0.0339178	chr1	KIF26B	NM_018012
7274	cg17933722	0.0201571	0.0488958	chr1
7281	cg17969662	-0.0304199	0.037004	chr1
7282	cg17970328	-0.00852267	0.0406695	chr1	GJB4	NM_153212
7283	cg17972058	-0.030223	0.0215414	chr1	SLAMF8	NM_020125
7284	cg17972213	-0.0352696	0.0196901	chr1	S1PR1	NM_001400
7304	cg18028470	-0.0606499	0.0334258	chr1	PIGV	NM_017837
7325	cg18085407	0.0274253	0.00997808	chr1
7348	cg18133072	-0.0240229	0.0392094	chr1	XKR8	NM_018053
7351	cg18142162	-0.0804999	0.037341	chr1	CCDC23;ERMAP	NM_199342;NM_001017922
7359	cg18169013	-0.0190613	0.0150456	chr1	PPFIA4	NM_015053
7360	cg18172358	-0.0336147	0.0341143	chr1	ST6GALNAC3;ST6GALNAC3	NM_152996;NM_001160011
7365	cg18192602	0.0151634	0.0499663	chr1
7374	cg18224588	-0.0242946	0.0202247	chr1	ACAP3;PUSL1	NM_030649;NM_153339
7416	cg18376288	0.0437406	0.0152489	chr1
7417	cg18382926	-0.00865176	0.030371	chr1	TTLL10;TTLL10	NM_153254;NM_001130045
7418	cg18384097	-0.0606495	0.021822	chr1	PTPN7;PTPN7	NM_080588;NM_002832
7445	cg18438591	0.032533	0.0499663	chr1	CDK18;CDK18;CDK18	NM_212502;NM_212503;NM_002596
7520	cg18641151	0.0334842	0.0374877	chr1	ARHGEF10L	NM_018125
7571	cg18794839	0.0212543	0.0373184	chr1	KCNK2;KCNK2;KCNK2	NM_014217;NM_001017425;NM_001017424
7585	cg18839416	-0.0327276	0.0410053	chr1	C1orf158	NM_152290
7592	cg18861547	-0.00846059	0.0379067	chr1	HSPG2	NM_005529
7602	cg18883198	-0.0431209	0.023093	chr1	TMEM57	NM_018202
7613	cg18936620	-0.05045	0.0263238	chr1	MPL	NM_005373
7614	cg18944010	0.0205463	0.0274601	chr1	TBX15	NM_152380
7626	cg18964375	0.0332247	0.0310505	chr1
7664	cg19084893	-0.0564768	0.0482001	chr1
7666	cg19086488	-0.0780308	0.03492	chr1	C1orf210;C1orf210	NM_001164829;NM_182517
7669	cg19098763	0.019112	0.0151212	chr1	ELAVL4	NM_001144777
7683	cg19164175	0.0149162	0.0349916	chr1	VWA5B1	NM_001039500
7706	cg19247726	0.0660581	0.0420381	chr1	OBSCN	NM_001098623
7711	cg19274341	0.0492904	0.0288631	chr1
7719	cg19301058	0.0187168	0.0300306	chr1	TXNIP	NM_006472
7731	cg19356311	-0.0320339	0.0371344	chr1
7736	cg19383974	0.0285459	0.0369394	chr1
7743	cg19409133	-0.0577158	0.0455071	chr1	SNHG3-RCC1;RCC1;SNHG3-RCC1;RCC1;SNHG3-RCC1;RCC1	NR_030725;NM_001269;NR_030726;NM_001048195;NM_001048199;NM_001048194
7781	cg19498794	-0.0292187	0.0246699	chr1	RASAL2;RASAL2	NM_004841;NM_170692
7813	cg19587105	-0.0212245	0.025733	chr1	MIA3	NM_198551
7849	cg19682684	-0.0162935	0.0179412	chr1
7852	cg19689322	0.0347913	0.030751	chr1	KCNQ4;KCNQ4	NM_004700;NM_172163
7859	cg19712659	-0.0507808	0.0145981	chr1	SNHG12;SNORD99;SNORA61	NR_024127;NR_003077;NR_002987
7862	cg19719807	0.0274154	0.0365249	chr1	CD164L2	NM_207397
7863	cg19721680	0.0192229	0.0155775	chr1	PPPDE1	NM_016076
7866	cg19724668	-0.0182619	0.033614	chr1	FOXJ3	NM_014947
7873	cg19751545	-0.0137883	0.0353719	chr1	NPR1	NM_000906
7876	cg19755069	-0.00851903	0.030751	chr1	CSF1;CSF1	NM_000757;NM_172211
7877	cg19767020	-0.0132034	0.0255622	chr1	PBX1	NM_002585
7882	cg19778776	0.0495857	0.0461079	chr1	DYRK3;DYRK3	NM_001004023;NM_003582
7887	cg19789165	-0.0127259	0.0416987	chr1
7896	cg19811123	0.0478886	0.00827796	chr1	OBSCN;OBSCN	NM_052843;NM_001098623
7903	cg19827787	0.0657927	0.0425383	chr1	ASAP3;ASAP3	NM_017707;NM_001143778
7914	cg19864060	-0.0602685	0.0155234	chr1
7931	cg19913118	-0.0170719	0.0332627	chr1	POLR3GL;ANKRD34A	NM_032305;NM_001039888
7934	cg19915466	-0.0149462	0.0439532	chr1	C1orf86;LOC100128003;C1orf86	NM_001146310;NR_024445;NM_182533
7936	cg19922871	0.0595842	0.0305389	chr1
7955	cg19993589	-0.0126279	0.0462987	chr1	FAM5B	NM_021165
7981	cg20063270	-0.0104503	0.033306	chr1
7983	cg20065217	-0.0343498	0.0221794	chr1
8011	cg20141108	-0.0389421	0.0204652	chr1
8042	cg20252997	-0.112529	0.010269	chr1	LOC284661	NR_027088
8060	cg20287514	0.0274889	0.0331104	chr1	LDLRAP1	NM_015627
8065	cg20300343	0.029783	0.0177533	chr1
8066	cg20302133	-0.0431958	0.0315906	chr1	KCNA3	NM_002232
8070	cg20312179	-0.027305	0.0291003	chr1	EPS15	NM_001981
8073	cg20323571	-0.0248875	0.0461696	chr1	MIR488;ASTN1;ASTN1	NR_030163;NM_207108;NM_004319
8074	cg20327105	0.0437785	0.030534	chr1	KIFAP3	NM_014970
8075	cg20329084	0.0460966	0.021108	chr1
8076	cg20329405	0.0488004	0.0116225	chr1	LHX9;LHX9	NM_020204;NM_001014434
8100	cg20388062	-0.0171617	0.0489037	chr1	RAD54L;RAD54L;RAD54L;RAD54L	NM_001142548;NM_003579;NM_001142548;NM_003579
8104	cg20417195	-0.0184966	0.0372647	chr1	NBPF3	NM_032264
8118	cg20460771	-0.0444256	0.0198112	chr1	PTAFR;PTAFR	NM_001164721;NM_001164722
8133	cg20510033	-0.0595117	0.01979	chr1
8160	cg20594809	-0.0127631	0.0147945	chr1	LHX8	NM_001001933
8161	cg20596348	-0.0173068	0.0242176	chr1	PINK1	NM_032409
8167	cg20609679	-0.0283158	0.0421289	chr1	SMYD3	NM_001167740
8188	cg20676350	-0.0275055	0.0411217	chr1	C1QA	NM_015991
8189	cg20686125	-0.0316265	0.0335262	chr1	AKT3;AKT3	NM_005465;NM_181690
8192	cg20692268	-0.0708141	0.0252954	chr1
8199	cg20707323	0.0134651	0.0263238	chr1
8220	cg20768358	0.121691	0.0198577	chr1	TP73	NM_005427
8235	cg20806427	0.0448666	0.0230837	chr1
8248	cg20847292	-0.0190869	0.0375147	chr1	ARHGEF2;ARHGEF2;ARHGEF2	NM_004723;NM_001162383;NM_001162384
8249	cg20848218	-0.118691	0.00910014	chr1
8259	cg20869501	0.0112226	0.0151396	chr1	ESRRG;ESRRG;ESRRG;ESRRG;ESRRG	NM_206594;NM_206595;NM_001438;NM_001134285;NR_024099
8282	cg20932535	-0.0109363	0.0421497	chr1	PAX7;PAX7;PAX7	NM_013945;NM_002584;NM_001135254
8284	cg20936321	-0.0145686	0.0143191	chr1
8301	cg20975414	-0.0508709	0.0444914	chr1	CD160	NM_007053
8303	cg20977411	0.0221543	0.0295303	chr1	PMVK;PMVK	NM_006556;NM_006556
8304	cg20978193	0.0622709	0.0123482	chr1	SCNN1D;SCNN1D	NM_001130413;NM_002978
8308	cg20985269	-0.00874017	0.0397471	chr1	OR10Z1	NM_001004478
8309	cg20994118	-0.0286863	0.01045	chr1	CAMK1G	NM_020439
8312	cg20996351	0.0215102	0.0335306	chr1	MAP3K6	NM_004672
8362	cg21144493	0.0784821	0.0122813	chr1	CAMTA1	NM_015215
8379	cg21189909	0.0717191	0.0326866	chr1	FAM131C	NM_182623
8392	cg21221690	-0.0088941	0.0477535	chr1	GPR177;GPR177	NM_001002292;NM_024911
8402	cg21268984	0.0551721	0.0420381	chr1	RERE;RERE	NM_012102;NM_001042681
8406	cg21286782	0.0163379	0.0490421	chr1	FAM19A3;FAM19A3	NM_182759;NM_001004440
8431	cg21386414	0.0676322	0.0382016	chr1
8432	cg21393163	-0.06305	0.0373184	chr1
8435	cg21395577	0.0168152	0.0470781	chr1
8453	cg21454760	-0.0209909	0.0490348	chr1	ARID1A;ARID1A	NM_006015;NM_139135
8456	cg21460394	0.0374457	0.015864	chr1	ESPNP	NR_026567
8471	cg21523496	-0.0165776	0.0181736	chr1	DDAH1	NM_001134445
8491	cg21583850	0.0218043	0.0410481	chr1	KCND3;KCND3	NM_172198;NM_004980
8503	cg21607848	-0.0196442	0.01119	chr1	ESRRG;ESRRG;ESRRG;ESRRG;ESRRG	NM_206594;NM_206595;NM_001438;NM_001134285;NR_024099
8530	cg21681702	-0.00921627	0.0425383	chr1	LRRC7	NM_020794
8535	cg21690979	-0.0187374	0.0420381	chr1	IRF2BP2;IRF2BP2	NM_182972;NM_001077397
8562	cg21774136	-0.0430799	0.0219715	chr1	RERE;RERE	NM_012102;NM_001042681
8564	cg21777154	-0.0170519	0.0115558	chr1	C1orf21	NM_030806
8566	cg21786227	-0.0323885	0.0440082	chr1	CKS1B;CKS1B	NR_024163;NM_001826
8578	cg21837323	-0.0233347	0.015287	chr1	EIF2C3;EIF2C3	NM_177422;NM_024852
8585	cg21863016	-0.00508968	0.0396878	chr1	UBR4	NM_020765
8589	cg21871952	0.056183	0.0318222	chr1
8607	cg21913319	0.0252366	0.0320139	chr1	COL24A1	NM_152890
8612	cg21919968	-0.0216399	0.00840392	chr1
8615	cg21930668	-0.0135506	0.0372544	chr1	PADI3	NM_016233
8635	cg21996227	0.0155501	0.0310832	chr1	SEMA4A	NM_022367
8637	cg22007047	-0.0136341	0.022668	chr1
8648	cg22026450	-0.0523005	0.0235331	chr1	LIX1L	NM_153713
8649	cg22040158	-0.0357676	0.0317025	chr1	KCND3;KCND3	NM_172198;NM_004980
8681	cg22129059	-0.0321815	0.0420834	chr1
8683	cg22129135	-0.0158706	0.049913	chr1	NPHP4	NM_015102
8684	cg22131237	-0.0129657	0.0286109	chr1	POGK	NM_017542
8695	cg22167515	0.0216686	0.00712364	chr1
8734	cg22320000	-0.0184307	0.0470283	chr1	HNRNPU;HNRNPU;HNRNPU;HNRNPU	NM_004501;NM_004501;NM_031844;NM_031844
8771	cg22451356	-0.0250211	0.035606	chr1	KCNAB2;KCNAB2	NM_172130;NM_003636
8782	cg22482700	-0.0309666	0.0488593	chr1	GPR177;GPR177	NM_001002292;NM_024911
8786	cg22489498	0.0270975	0.0498888	chr1	PROX1	NM_002763
8791	cg22505006	0.0400015	0.0195353	chr1	ZBTB7B	NM_015872
8794	cg22512779	-0.011029	0.030758	chr1
8822	cg22606205	0.012334	0.0128376	chr1	PKP1;PKP1;PKP1;PKP1	NM_001005337;NM_000299;NM_000299;NM_001005337
8823	cg22609277	0.0168643	0.0147665	chr1
8824	cg22616255	0.0226597	0.0349676	chr1
8826	cg22618350	0.0128018	0.0434404	chr1	ZNF644;ZNF644;ZNF644;ZNF644;ZNF644	NM_032186;NM_032186;NM_201269;NM_201269;NM_016620
8829	cg22622495	-0.0142467	0.0454452	chr1	CDC7;CDC7;CDC7;CDC7;CDC7	NM_001134419;NM_003503;NM_001134419;NM_001134420;NM_003503
8848	cg22675825	-0.0172631	0.0323783	chr1	MUTYH;TOE1;MUTYH;TOE1;MUTYH;MUTYH;MUTYH;MUTYH;MUTYH;MUTYH	NM_012222;NM_025077;NM_001048172;NM_025077;NM_001128425;NM_001048172;NM_001048171;NM_001048173;NM_001048174;NM_001048173
8849	cg22678073	0.0471967	0.0470283	chr1	ERRFI1	NM_018948
8850	cg22678754	0.0445292	0.0331907	chr1
8859	cg22694271	0.073338	0.0184065	chr1	PSRC1;PSRC1;PSRC1;PSRC1	NM_032636;NM_001032291;NM_001005290;NM_001032290
8861	cg22697325	-0.0359721	0.00663616	chr1	MACF1	NM_012090
8862	cg22697365	-0.0143012	0.0181906	chr1	PROK1	NM_032414
8868	cg22727810	-0.0216237	0.0407709	chr1
8885	cg22790758	-0.0167904	0.0383527	chr1	KIAA1026;KIAA1026	NM_201628;NM_015209
8890	cg22820285	-0.0160864	0.0246473	chr1
8935	cg22948959	0.0362957	0.018468	chr1
8970	cg23048494	-0.0349826	0.0052195	chr1	S100A4;S100A4	NM_002961;NM_019554
8982	cg23093580	-0.0119853	0.0379067	chr1	NDUFS5	NM_004552
9012	cg23166865	0.0248295	0.0138161	chr1
9029	cg23201841	0.0181468	0.030213	chr1	ELK4;ELK4	NM_021795;NM_001973
9036	cg23213449	-0.00956801	0.0204255	chr1
9042	cg23237972	-0.0158573	0.0356866	chr1
9051	cg23273418	-0.0123969	0.0373184	chr1	PRDM16;PRDM16	NM_022114;NM_199454
9056	cg23291161	0.021351	0.0398917	chr1	LAD1	NM_005558
9071	cg23343444	-0.012776	0.0480289	chr1	HIST2H2AB;HIST2H2BE	NM_175065;NM_003528
9084	cg23400617	-0.0135665	0.0199028	chr1
9092	cg23413307	-0.0079495	0.0475169	chr1	LCE1F	NM_178354
9165	cg23598089	-0.0238346	0.0351063	chr1	ATP2B4;ATP2B4	NM_001001396;NM_001684
9168	cg23606775	0.0291074	0.0287779	chr1	CLSTN1;CLSTN1	NM_001009566;NM_014944
9170	cg23610373	0.0112682	0.0420381	chr1
9180	cg23633679	-0.0190006	0.0274891	chr1	CENPL;CENPL;CENPL;CENPL;DARS2;CENPL	NM_001171182;NM_001127181;NM_033319;NM_033319;NM_018122;NM_001127181
9186	cg23643973	-0.0550987	0.0246286	chr1
9189	cg23652484	0.039281	0.0248857	chr1
9191	cg23664334	0.0305559	0.0186677	chr1	LOC388692	NR_027002
9195	cg23670968	0.0130896	0.036708	chr1	FUBP1	NM_003902
9200	cg23682913	0.0361594	0.0275753	chr1	PRKCZ;PRKCZ;PRKCZ	NM_001033581;NM_001033582;NM_002744
9240	cg23842386	-0.0105326	0.0499663	chr1	ENAH;ENAH;ENAH;ENAH	NM_018212;NM_001008493;NM_001008493;NM_018212
9241	cg23843953	-0.0135281	0.0304779	chr1	GALNT2	NM_004481
9257	cg23889047	-0.0722274	0.0331104	chr1	CAMTA1	NM_015215
9269	cg23921621	-0.0371766	0.0386562	chr1	IFI6;IFI6;IFI6	NM_022872;NM_002038;NM_022873
9274	cg23933216	-0.0588119	0.0228326	chr1	PDE4DIP	NM_022359
9297	cg23996123	-0.0152403	0.0336708	chr1
9305	cg24027679	-0.0115815	0.0230837	chr1	SLC2A7	NM_207420
9309	cg24038105	-0.0466089	0.0421758	chr1	FHAD1	NM_052929
9310	cg24039149	-0.00971268	0.0262986	chr1	ARHGEF16	NM_014448
9317	cg24054215	-0.0134485	0.0132609	chr1	RAB7L1;RAB7L1;RAB7L1;RAB7L1;RAB7L1	NM_001135663;NM_003929;NM_001135662;NM_001135663;NM_001135664
9319	cg24054683	-0.00926429	0.0398575	chr1	PRKCZ;PRKCZ;PRKCZ	NM_001033581;NM_001033582;NM_002744
9327	cg24087736	-0.0120813	0.0475176	chr1
9346	cg24152080	-0.0145284	0.0106812	chr1	SCP2;SCP2;SCP2;SCP2	NM_001007100;NM_002979;NM_001007099;NM_001007250
9347	cg24152264	-0.0387087	0.00700836	chr1
9395	cg24315209	-0.0373642	0.0294098	chr1	CDK18;CDK18;CDK18	NM_002596;NM_212502;NM_212503
9397	cg24327491	-0.0222893	0.0290291	chr1	GMEB1;GMEB1	NM_006582;NM_024482
9401	cg24334174	0.0165885	0.0205013	chr1	LDLRAD2	NM_001013693
9405	cg24338780	0.0142691	0.0384835	chr1	CACYBP;CACYBP	NM_014412;NM_001007214
9409	cg24347098	-0.0275121	0.0154087	chr1	SLC16A1;SLC16A1	NM_001166496;NM_003051
9411	cg24351658	-0.0592398	0.00851946	chr1	HIVEP3;HIVEP3	NM_024503;NM_001127714
9413	cg24360269	0.0377288	0.0164188	chr1
9414	cg24367316	0.070969	0.0265724	chr1	SFRS11;LRRC40	NM_004768;NM_017768
9416	cg24371574	-0.0249181	0.00827796	chr1
9424	cg24401262	0.0750448	0.0331718	chr1
9435	cg24430578	-0.0470026	0.0428042	chr1	TSNAX-DISC1;DISC1;DISC1;DISC1;DISC1;TSNAX-DISC1;DISC1;DISC1;TSNAX-DISC1;DISC1;TSNAX-DISC1;DISC1;DISC1;TSNAX-DISC1;DISC1;DISC1;DISC1;DISC1;DISC1;DISC1;DISC1;DISC1;DISC1;TSNAX-DISC1;TSNAX-DISC1;DISC1;DISC1;DISC1;TSNAX-DISC1;DISC1;DISC1	NR_028394;NM_001164556;NM_001164538;NM_018662;NM_001164555;NR_028397;NM_001164554;NM_001164552;NR_028393;NM_001164537;NR_028400;NM_001164551;NM_001164539;NR_028398;NM_001164540;NM_001164542;NM_001164548;NM_001012959;NM_001164547;NM_001164550;NM_001164546;NM_001012957;NM_001012958;NR_028399;NR_028395;NM_001164545;NM_001164549;NM_001164544;NR_028396;NM_001164553;NM_001164541
9438	cg24435669	-0.0234619	0.0382016	chr1	TMEM51;TMEM51;TMEM51;TMEM51	NM_001136217;NM_001136218;NM_001136216;NM_018022
9445	cg24450653	-0.0229637	0.0420649	chr1	RBBP5	NM_005057
9468	cg24513381	-0.0229183	0.0436495	chr1	PRRX1;PRRX1	NM_022716;NM_006902
9469	cg24514391	-0.0248857	0.0323294	chr1	UBXN10	NM_152376
9475	cg24530728	-0.024084	0.00801904	chr1
9478	cg24535918	-0.0389183	0.0303069	chr1	RAB3B	NM_002867
9480	cg24540109	-0.0259022	0.048702	chr1	PEF1	NM_012392
9481	cg24544490	0.0455013	0.0212182	chr1	RUSC1;RUSC1;C1orf104	NM_001105203;NM_001105204;NM_001039517
9496	cg24578937	0.0753461	0.0470362	chr1	PRKCZ;PRKCZ;PRKCZ	NM_001033581;NM_001033582;NM_002744
9500	cg24593138	-0.0208246	0.030751	chr1	CAPZB	NM_004930
9516	cg24640440	-0.0163059	0.040335	chr1
9517	cg24642483	-0.0346738	0.0469008	chr1	FCER1A	NM_002001
9523	cg24664308	-0.0469489	0.030751	chr1
9525	cg24669728	-0.021079	0.0417769	chr1	CTPS	NM_001905
9541	cg24691964	-0.0409349	0.0327792	chr1	CD84	NM_003874
9542	cg24693072	-0.00715671	0.0464068	chr1
9548	cg24707200	-0.016817	0.0331792	chr1	NTRK1;NTRK1;NTRK1	NM_001007792;NM_002529;NM_001012331
9559	cg24729839	-0.0109355	0.0233257	chr1
9560	cg24730688	0.0586428	0.0403042	chr1	KIF17;KIF17	NM_001122819;NM_020816
9587	cg24807889	0.0394505	0.0313877	chr1
9599	cg24847046	-0.0195384	0.0179061	chr1	PPOX;USP21;USP21;PPOX	NM_001122764;NM_012475;NM_001014443;NM_000309
9603	cg24854435	0.0298361	0.030659	chr1	LOC388692	NR_027002
9607	cg24875017	0.0425778	0.00780001	chr1	ESPNP	NR_026567
9614	cg24884142	0.0314578	0.014238	chr1	TBX15;TBX15	NM_152380;NM_152380
9615	cg24884343	-0.0670468	0.0267218	chr1
9616	cg24886708	-0.0476094	0.0164188	chr1
9650	cg25001190	-0.00992539	0.0280274	chr1	NFIA;NFIA;NFIA;NFIA	NM_001145512;NM_001145511;NM_001134673;NM_005595
9651	cg25004270	0.0214028	0.0268765	chr1	MIB2;MIB2;MIB2;MIB2;MIB2;MIB2	NM_001170689;NM_080875;NM_001170686;NM_001170687;NM_001170688;NR_033183
9652	cg25005345	-0.0383794	0.0388895	chr1	PHC2;PHC2	NM_004427;NM_198040
9663	cg25035631	0.107861	0.0366275	chr1
9678	cg25076881	-0.0367165	0.0229905	chr1	OR10J1	NM_012351
9686	cg25099516	-0.0148895	0.0481945	chr1
9689	cg25112191	-0.0236617	0.0235761	chr1	RORC;RORC	NM_005060;NM_005060
9697	cg25139649	0.0849775	0.00849911	chr1	SKI	NM_003036
9699	cg25141890	-0.0096744	0.0423205	chr1
9701	cg25143508	-0.0470643	0.0216172	chr1	PRELP;PRELP	NM_201348;NM_002725
9705	cg25150721	-0.0219253	0.0304238	chr1	CDC14A;CDC14A;CDC14A	NM_003672;NM_033312;NM_033313
9715	cg25191850	0.0290458	0.0398309	chr1	KCNK1	NM_002245
9718	cg25199322	-0.0154529	0.0347604	chr1	C1orf230	NM_001144956
9725	cg25217276	0.0297242	0.0286186	chr1	GNG4;GNG4;GNG4	NM_004485;NM_001098721;NM_001098722
9757	cg25341313	-0.0357416	0.00827796	chr1
9760	cg25345603	-0.00654393	0.042998	chr1	ACOT7	NM_007274
9773	cg25369168	0.015319	0.021822	chr1	FAM163A	NM_173509
9805	cg25467973	-0.0252726	0.0147534	chr1	KIAA0495;KIAA0495	NM_207306;NM_207306
9807	cg25469212	0.0115323	0.0330052	chr1	ZCCHC17;SNRNP40;SNRNP40	NM_016505;NM_004814;NM_004814
9858	cg25594636	-0.0157385	0.0359469	chr1	YOD1;YOD1	NM_018566;NM_018566
9867	cg25622154	0.0435542	0.0462962	chr1
9903	cg25706060	0.0167337	0.0154087	chr1	C1orf95	NM_001003665
9912	cg25727477	-0.0252029	0.0205082	chr1	CD46;CD46;CD46;CD46;CD46;CD46;CD46;CD46;CD46;CD46;CD46;CD46;CD46;CD46	NM_172357;NM_172354;NM_172361;NM_002389;NM_153826;NM_172360;NM_172359;NM_172356;NM_172358;NM_172350;NM_172353;NM_172355;NM_172352;NM_172351
9925	cg25773262	0.0674701	0.0116024	chr1	BCAN;BCAN	NM_198427;NM_021948
9957	cg25851789	-0.0188454	0.0315906	chr1	ESRRG	NM_001134285
9964	cg25882709	0.016591	0.0227892	chr1	NVL;NVL;NVL;NVL	NM_206840;NM_206840;NM_002533;NM_002533
9979	cg25932378	0.0346323	0.0492947	chr1	STIL;STIL	NM_003035;NM_001048166
9998	cg26004771	0.0963468	0.022703	chr1
10002	cg26011771	-0.0320151	0.0291922	chr1	IQCC;IQCC	NM_018134;NM_001160042
10006	cg26022257	-0.043483	0.00951689	chr1
10017	cg26055950	0.0742498	0.0310429	chr1	TP73	NM_005427
10022	cg26068551	0.0195697	0.0494645	chr1	PRKAA2	NM_006252
10030	cg26108416	-0.0409424	0.00827796	chr1	BEND5;AGBL4	NM_024603;NM_032785
10032	cg26115927	-0.0099766	0.0404579	chr1	PRPF38A;ORC1L	NM_032864;NM_004153
10045	cg26148135	0.0503847	0.0205075	chr1	C1orf96	NM_145257
10052	cg26160543	-0.0106093	0.0157405	chr1
10075	cg26196087	-0.0332254	0.0364984	chr1	NOTCH2	NM_024408
10083	cg26225694	0.014141	0.0137743	chr1	LHX4	NM_033343
10089	cg26246880	-0.110694	0.0268533	chr1	PYHIN1;PYHIN1;PYHIN1;PYHIN1	NM_198930;NM_198929;NM_152501;NM_198928
10090	cg26246947	-0.0348607	0.0499292	chr1	C1orf228	NM_001145636
10094	cg26257082	0.029304	0.0411411	chr1
10095	cg26263401	0.0186501	0.0246248	chr1	GIPC2	NM_017655
10111	cg26301690	-0.0128155	0.0169944	chr1	ELAVL4;ELAVL4;ELAVL4	NM_001144777;NM_001144776;NM_001144776
10112	cg26303165	0.04795	0.0386792	chr1	OBSCN;OBSCN	NM_052843;NM_001098623
10132	cg26359730	0.0893775	0.0457625	chr1	TNR	NM_003285
10144	cg26396535	-0.0177332	0.0482001	chr1	MEX3A	NM_001093725
10150	cg26421310	-0.0202886	0.0428177	chr1	RUNX3;RUNX3	NM_004350;NM_001031680
10151	cg26421805	-0.0208284	0.0344752	chr1
10154	cg26437845	-0.0599927	0.0398812	chr1	C1orf187	NM_198545
10182	cg26536460	-0.00848986	0.0177867	chr1	ATAD3A;ATAD3A;ATAD3A	NM_018188;NM_001170535;NM_001170536
10192	cg26564172	-0.0332239	0.0228468	chr1	RGL1	NM_015149
10201	cg26614229	0.0151802	0.0280274	chr1	MIR1182;FAM89A	NR_031593;NM_198552
10216	cg26669876	-0.0101059	0.0375349	chr1	LRRC8C	NM_032270
10250	cg26764244	-0.0520266	0.014238	chr1	GNG12	NM_018841
10255	cg26783856	0.0176293	0.0302555	chr1	LRRC8D;LRRC8D;LRRC8D	NM_018103;NM_018103;NM_001134479
10256	cg26784348	-0.0250859	0.0488289	chr1	SLC35D1	NM_015139
10267	cg26808417	-0.0323988	0.0320139	chr1	ARL8A	NM_138795
10268	cg26809372	-0.01313	0.0278698	chr1	LAMC1	NM_002293
10277	cg26835312	0.0422715	0.0476978	chr1	IL28RA;IL28RA;IL28RA	NM_170743;NM_173064;NM_173065
10284	cg26863172	0.051106	0.0181991	chr1	TMEM88B	NM_001146685
10302	cg26895571	-0.0110814	0.0115584	chr1	C1orf212;C1orf212;C1orf212	NM_001164824;NM_001164825;NM_138428
10316	cg26933021	-0.0372198	0.0120367	chr1
10318	cg26938364	-0.0238148	0.0203619	chr1	FLJ42875;PRDM16;PRDM16;FLJ42875	NR_015440;NM_199454;NM_022114;NR_024371
10354	cg27043786	0.042019	0.0402645	chr1
10407	cg27233027	-0.0290278	0.0257768	chr1	NME7;NME7	NM_013330;NM_197972
10430	cg27306802	0.0712349	0.0420381	chr1	MEGF6	NM_001409
10466	cg27392551	-0.0312413	0.0325838	chr1	C1orf223	NM_001145474
10487	cg27470554	0.0131839	0.0181909	chr1	FCGR2A;FCGR2A;FCGR2A;FCGR2A	NM_001136219;NM_021642;NM_001136219;NM_021642
10504	cg27514730	-0.0245389	0.0261634	chr1
10512	cg27534567	0.0714674	0.0341031	chr1
10513	cg27534772	-0.0252229	0.0338307	chr1	PLEKHM2	NM_015164
10517	cg27547812	-0.0182206	0.0314897	chr1	PDIK1L;PDIK1L;PDIK1L	NR_026685;NM_152835;NR_026686
10518	cg27547967	-0.04896	0.0158372	chr1	CYP4Z2P	NR_002788
10562	cg27650434	-0.0137513	0.0482471	chr1	MYCL1;MYCL1;MYCL1	NM_005376;NM_001033081;NM_001033082
10568	ch.1.1359032F	-0.0121556	0.0439823	chr1	PTPRF;PTPRF	NM_002840;NM_130440
10569	ch.1.2975077F	0.0343448	0.0471488	chr1	GATAD2B	NM_020699
10570	ch.1.3439660F	0.0144342	0.0324808	chr1	PAPPA2;PAPPA2	NM_021936;NM_020318
94	cg00183957	-0.0207053	0.0398621	chr10	MRPL43;C10orf2;C10orf2;MRPL43;MRPL43;C10orf2;MRPL43;C10orf2	NM_032112;NM_001163813;NM_001163812;NM_176792;NM_176793;NM_001163814;NM_176794;NM_021830
150	cg00320980	-0.0493135	0.0308455	chr10
230	cg00495658	-0.0262989	0.0356116	chr10	GDF2	NM_016204
253	cg00547480	0.0382016	0.0462485	chr10	LDB1;LDB1	NM_001113407;NM_003893
290	cg00630724	-0.0126932	0.0335298	chr10	PITX3	NM_005029
325	cg00697129	0.028255	0.0309845	chr10	KIAA1217;KIAA1217;KIAA1217;KIAA1217;KIAA1217	NM_019590;NM_019590;NM_001098500;NM_001098501;NM_001098501
371	cg00802855	-0.00908479	0.0438924	chr10	GPR123	NM_001083909
468	cg00982799	-0.0246412	0.0418108	chr10	PTPRE;PTPRE	NM_130435;NM_006504
508	cg01072942	0.0211785	0.0124247	chr10	SEC31B	NM_015490
585	cg01228636	-0.0262402	0.0348989	chr10	PTEN;KILLIN	NM_000314;NM_001126049
601	cg01255894	0.0242245	0.0106318	chr10	GATA3;GATA3	NM_001002295;NM_002051
624	cg01303372	0.042798	0.030659	chr10	BAG3	NM_004281
651	cg01357233	-0.00831254	0.016451	chr10	LRRC18;WDFY4	NM_001006939;NM_020945
690	cg01428849	-0.0200933	0.0258108	chr10	SH3PXD2A	NM_014631
693	cg01430621	0.0366837	0.0291922	chr10	MRPS16	NM_016065
717	cg01496220	0.0111441	0.0304678	chr10	PRDX3;PRDX3	NM_006793;NM_014098
861	cg01838941	0.027904	0.0357123	chr10	GPRIN2	NM_014696
974	cg02089629	0.041627	0.0332263	chr10	VENTX	NM_014468
983	cg02114346	0.0459168	0.0460945	chr10	PAOX;PAOX;PAOX	NM_152911;NM_207128;NM_207127
1019	cg02167201	-0.026374	0.0155144	chr10	CALHM2;CALHM2	NR_024552;NM_015916
1020	cg02172819	-0.0411927	0.00960877	chr10	KCNMA1;KCNMA1;KCNMA1;KCNMA1	NM_001161353;NM_001161352;NM_002247;NM_001014797
1040	cg02225096	-0.0118868	0.0389987	chr10	ANUBL1;ANUBL1	NM_001128324;NM_174890
1068	cg02271227	-0.0388646	0.0316555	chr10
1078	cg02302097	-0.0363004	0.0125906	chr10	PIPSL	NR_002319
1093	cg02344361	-0.00783209	0.0298156	chr10
1095	cg02356566	-0.0229405	0.024841	chr10
1122	cg02427200	-0.0143571	0.030534	chr10	TCTN3;TCTN3	NM_001143973;NM_015631
1131	cg02449166	0.0181877	0.0276395	chr10	EBF3	NM_001005463
1161	cg02505177	-0.042939	0.00780001	chr10	MGEA5;MGEA5	NM_001142434;NM_012215
1183	cg02567788	-0.0220237	0.0475661	chr10	PPA1	NM_021129
1200	cg02616604	0.0772839	0.03653	chr10	SYT15;SYT15	NM_181519;NM_031912
1225	cg02645368	0.0362804	0.0401389	chr10	VENTX	NM_014468
1318	cg02857557	0.0587288	0.0232595	chr10	INPP5F;INPP5F	NM_014937;NR_003252
1332	cg02887530	-0.0466725	0.0213171	chr10	ADARB2	NM_018702
1365	cg02943595	-0.0106831	0.032159	chr10	LOC143188	NR_015409
1415	cg03051983	-0.0305563	0.0488958	chr10
1424	cg03070297	0.0349196	0.0020281	chr10	DOCK1;FAM196A	NM_001380;NM_001039762
1461	cg03161190	0.0564741	0.00937123	chr10	C10orf26;C10orf26	NM_017787;NM_001083913
1470	cg03178609	-0.0343883	0.0418726	chr10	C10orf35	NM_145306
1486	cg03211864	-0.0693348	0.00951689	chr10	BTBD16	NM_144587
1496	cg03229242	-0.0321197	0.0468239	chr10	DIP2C	NM_014974
1500	cg03244690	-0.029794	0.0449688	chr10	TMEM20;TMEM20	NM_153226;NM_001134658
1527	cg03290131	-0.0506941	0.0230978	chr10	DUSP5	NM_004419
1574	cg03370738	0.021509	0.00851946	chr10	GRID1	NM_017551
1651	cg03539850	0.053254	0.00954154	chr10	PANK1;PANK1;PANK1	NM_148978;NM_148977;NM_138316
1660	cg03548330	-0.0240753	0.0482602	chr10	JAKMIP3	NM_001105521
1677	cg03576555	-0.0100911	0.0450543	chr10	CTBP2;CTBP2	NM_001083914;NM_001329
1698	cg03611868	0.0440908	0.0164188	chr10
1732	cg03696346	-0.0332072	0.0423434	chr10	ZNF485	NM_145312
1741	cg03711485	-0.0174488	0.0420381	chr10	NKX2-3	NM_145285
1786	cg03804621	0.0438263	0.0234402	chr10	FAM24B;LOC399815	NM_152644;NR_027282
1806	cg03880642	-0.10272	0.0076327	chr10	SH3PXD2A	NM_014631
1813	cg03905847	0.0138949	0.0196932	chr10	NKX6-2	NM_177400
1884	cg04064828	-0.00621231	0.030371	chr10	DPYSL4	NM_006426
1906	cg04122385	-0.0288305	0.0462485	chr10	KIAA1217;KIAA1217;PRINS;KIAA1217	NM_019590;NM_001098500;NR_023388;NM_001098501
1908	cg04123496	0.0131095	0.0479509	chr10	STK32C	NM_173575
1921	cg04140045	-0.0270393	0.0376665	chr10
1926	cg04149578	0.0255051	0.0315966	chr10
1930	cg04155450	-0.018966	0.048223	chr10
1944	cg04179740	0.0853879	0.014102	chr10	CDH23;C10orf54	NM_022124;NM_022153
2023	cg04347264	0.0650322	0.0191102	chr10	VENTX	NM_014468
2067	cg04440125	-0.0174031	0.0332303	chr10	ARHGAP22	NM_021226
2071	cg04452040	0.027748	0.0265938	chr10
2074	cg04453471	-0.0823035	0.0381856	chr10	MAP3K8	NM_005204
2075	cg04458206	-0.0124407	0.0406406	chr10	PAOX;PAOX;PAOX	NM_207128;NM_152911;NM_207127
2170	cg04680743	-0.0320446	0.0251556	chr10	FAM25A	NM_001146157
2189	cg04731091	0.063282	0.0147324	chr10	WDR37	NM_014023
2201	cg04759335	0.0911537	0.0211896	chr10	C10orf114	NM_001010911
2203	cg04764812	0.038926	0.0420381	chr10
2224	cg04813697	-0.0638718	0.0334101	chr10	PIP4K2A	NM_005028
2291	cg04957730	0.0247595	0.0172375	chr10	BMS1	NM_014753
2307	cg04996918	-0.0246016	0.0470845	chr10	ENTPD7	NM_020354
2315	cg05021029	-0.0458118	0.010403	chr10
2319	cg05026102	0.021709	0.0217906	chr10	ALOX5;ALOX5	NM_000698;NM_000698
2382	cg05171195	-0.0113399	0.0296506	chr10	RHOBTB1;RHOBTB1;RHOBTB1;RHOBTB1	NM_014836;NR_024555;NR_024554;NR_024556
2387	cg05184377	0.0397618	0.032048	chr10
2396	cg05204315	-0.0207162	0.0128473	chr10	DOCK1	NM_001380
2411	cg05251190	-0.0544621	0.0417983	chr10	MIR146B	NR_030169
2421	cg05265328	-0.0173068	0.0470351	chr10
2431	cg05296777	-0.0187564	0.0110892	chr10	SPOCK2	NM_014767
2432	cg05297677	-0.0296326	0.0332637	chr10
2437	cg05309934	-0.0166552	0.0249161	chr10	GDI2;GDI2;GDI2;GDI2	NM_001494;NM_001115156;NM_001115156;NM_001494
2480	cg05407489	-0.0177453	0.0336708	chr10
2534	cg05563110	0.0132127	0.0391677	chr10	ADRA2A	NM_000681
2547	cg05593775	0.0423554	0.0364824	chr10	PDZD7	NM_024895
2548	cg05595753	-0.0216326	0.0156037	chr10	ADARB2	NM_018702
2566	cg05652533	0.0115612	0.0484364	chr10	DPYSL4	NM_006426
2611	cg05801246	0.0305745	0.00946916	chr10	CPXM2	NM_198148
2644	cg05886671	-0.0158438	0.0458957	chr10	NEUROG3	NM_020999
2678	cg05949800	0.0182254	0.0341085	chr10	NKX2-3	NM_145285
2681	cg05953020	-0.0256011	0.0110096	chr10	GLRX3	NM_006541
2699	cg05982835	0.021142	0.0358464	chr10	CASP7;CASP7;CASP7;CASP7	NM_033340;NM_033339;NM_033338;NM_001227
2700	cg05983405	-0.00928394	0.00951689	chr10	PRF1;PRF1	NM_001083116;NM_005041
2732	cg06083652	-0.0257348	0.0363564	chr10	ADARB2	NM_018702
2806	cg06261052	-0.0294658	0.0110892	chr10	BEND7;BEND7	NM_001100912;NM_152751
2844	cg06395652	-0.0112533	0.023795	chr10	PCDH15;PCDH15;PCDH15;PCDH15	NM_001142770;NM_001142772;NM_001142769;NM_001142771
2848	cg06401999	-0.0129517	0.0152287	chr10	MGMT	NM_002412
2874	cg06466203	-0.0228517	0.035599	chr10	PTEN;KILLIN;PTEN	NM_000314;NM_001126049;NM_000314
2898	cg06520821	-0.00587904	0.0412817	chr10	MTG1	NM_138384
2915	cg06560760	0.0153799	0.0379637	chr10	ARMC3	NM_173081
2974	cg06678005	-0.00881148	0.0420721	chr10
2976	cg06685340	0.0302187	0.0351911	chr10	TSPAN14;TSPAN14	NM_001128309;NM_030927
3036	cg06801028	0.0899504	0.0457428	chr10	NCOA4;NCOA4;NCOA4;NCOA4;NCOA4	NM_005437;NM_001145263;NM_001145261;NM_001145262;NM_001145260
3062	cg06857304	0.0202619	0.043927	chr10	CYP26C1	NM_183374
3070	cg06874323	0.0138158	0.0448117	chr10
3113	cg06957677	-0.0224381	0.0399497	chr10	RRP12;RRP12	NM_001145114;NM_015179
3117	cg06974428	-0.0670643	0.012259	chr10	PIP4K2A	NM_005028
3133	cg07028396	0.0668364	0.0314897	chr10
3138	cg07042289	-0.0469549	0.0329892	chr10
3144	cg07053216	-0.00581186	0.0420381	chr10	STK32C	NM_173575
3188	cg07128021	-0.0501586	0.0388512	chr10	LOC283050;LOC283050;LOC283050	NR_024431;NR_024429;NR_015429
3253	cg07284558	0.0184346	0.0375128	chr10	STK32C	NM_173575
3259	cg07303968	-0.0216277	0.04878	chr10	HSPA12A	NM_025015
3260	cg07304173	-0.0142262	0.0410481	chr10	RBP3	NM_002900
3288	cg07361056	-0.024089	0.0265724	chr10	SVIL;SVIL	NM_021738;NM_003174
3332	cg07451524	-0.0177594	0.0459106	chr10	TACC2;TACC2;TACC2;TACC2	NM_206862;NM_006997;NM_206861;NM_206860
3342	cg07488327	0.0273867	0.0387335	chr10
3371	cg07562483	0.0287966	0.0391665	chr10	LOC387647	NR_003930
3372	cg07562888	-0.00557135	0.047666	chr10	ZMIZ1	NM_020338
3402	cg07621046	0.0212721	0.0421382	chr10	C10orf82	NM_144661
3408	cg07638650	0.0426171	0.0161359	chr10	RASGEF1A	NM_145313
3416	cg07657332	-0.04706	0.0279397	chr10
3448	cg07734159	0.072023	0.0368011	chr10	VCL;VCL	NM_003373;NM_014000
3455	cg07746882	-0.023273	0.00736213	chr10
3505	cg07869830	0.029145	0.0376504	chr10	NEURL	NM_004210
3530	cg07919108	0.0180973	0.0383145	chr10
3534	cg07927953	-0.0132514	0.0111579	chr10	INPP5A	NM_005539
3559	cg07984358	-0.0249513	0.00834632	chr10	KIAA1217;KIAA1217;KIAA1217	NM_019590;NM_001098500;NM_001098501
3563	cg07986469	0.0622638	0.0426293	chr10	PTPRE	NM_006504
3597	cg08079763	-0.0375932	0.0168765	chr10	DIP2C	NM_014974
3608	cg08101174	-0.0393226	0.0158792	chr10
3648	cg08199273	0.0249503	0.046572	chr10	GLRX3	NM_006541
3669	cg08243626	0.0327475	0.0066687	chr10
3692	cg08293528	0.0346058	0.032764	chr10	CDH23	NM_022124
3705	cg08326370	0.0392748	0.0303997	chr10
3706	cg08326879	-0.0229242	0.0141011	chr10
3711	cg08341667	0.0532419	0.0496169	chr10	ZNF488	NM_153034
3723	cg08376828	0.0246851	0.0499541	chr10
3748	cg08441029	-0.0106038	0.0258587	chr10	CUGBP2;CUGBP2	NM_006561;NM_001025077
3751	cg08444220	0.010174	0.0461761	chr10	NKX6-2	NM_177400
3848	cg08720786	-0.018642	0.0157334	chr10
3875	cg08797625	0.0198788	0.0317171	chr10	CAMK2G;CAMK2G;CAMK2G;CAMK2G;CAMK2G	NM_172173;NM_172169;NM_172170;NM_001222;NM_172171
3887	cg08826264	-0.0119094	0.0356342	chr10	TRDMT1;TRDMT1;TRDMT1	NM_176081;NM_004412;NM_176083
3896	cg08863620	0.0786038	0.00636452	chr10
3898	cg08867893	-0.0120334	0.0299127	chr10	ZNF365;ZNF365;ZNF365;ZNF365;ZNF365;ZNF365	NM_199450;NM_199451;NM_014951;NM_199451;NM_199450;NM_014951
3918	cg08927006	0.0135845	0.0441848	chr10	HPSE2;HPSE2;HPSE2;HPSE2	NM_001166244;NM_001166245;NM_021828;NM_001166246
3922	cg08939521	0.0722522	0.0476434	chr10
3932	cg08971562	-0.0514152	0.0445618	chr10	ADARB2	NM_018702
3939	cg08995871	0.0512086	0.0284455	chr10	DUPD1	NM_001003892
4022	cg09223928	-0.00719139	0.0269983	chr10
4026	cg09239524	-0.018658	0.0448575	chr10
4054	cg09323434	0.0647867	0.0220883	chr10	CCNJ;CCNJ;CCNJ	NM_001134376;NM_001134375;NM_019084
4062	cg09341008	-0.0151529	0.0309791	chr10	EGR2;EGR2;EGR2;EGR2;EGR2;EGR2;EGR2	NM_001136178;NM_001136177;NM_001136179;NM_001136179;NM_000399;NM_001136177;NM_000399
4066	cg09344098	-0.0335718	0.00942718	chr10	INPP5A	NM_005539
4067	cg09344229	-0.00910055	0.0190127	chr10
4112	cg09510780	-0.0243149	0.00636452	chr10	PSD;FBXL15	NM_002779;NM_024326
4133	cg09584359	-0.00882191	0.037736	chr10	ZMIZ1	NM_020338
4139	cg09607482	0.0510352	0.0166572	chr10
4151	cg09622269	0.0444444	0.0222337	chr10	DUPD1	NM_001003892
4177	cg09684112	0.0497633	0.0242268	chr10	FRMD4A	NM_018027
4182	cg09701700	-0.0593811	0.0387567	chr10	MIR146B	NR_030169
4248	cg09890775	0.0174709	0.0214266	chr10	EBF3	NM_001005463
4260	cg09936400	-0.00881981	0.0306803	chr10	MAT1A;MAT1A	NM_000429;NM_000429
4277	cg09977794	0.0104061	0.0398969	chr10
4287	cg09991092	-0.0109861	0.0469619	chr10
4339	cg10119075	0.0498992	0.00910014	chr10	ITIH5;ITIH5	NM_030569;NM_001001851
4361	cg10166314	-0.0217222	0.0179061	chr10
4371	cg10185984	-0.0268879	0.0371368	chr10
4421	cg10319870	-0.00883443	0.0368011	chr10
4447	cg10420063	0.0931609	0.0243941	chr10
4459	cg10434482	-0.0270816	0.0483254	chr10	ITIH5;ITIH5	NM_030569;NM_001001851
4463	cg10441934	0.0308976	0.0397927	chr10	HPSE2;HPSE2;HPSE2;HPSE2	NM_001166244;NM_001166246;NM_001166245;NM_021828
4537	cg10612237	-0.0191279	0.0380641	chr10	ZMIZ1;LOC283050;LOC283050;LOC283050	NM_020338;NR_024431;NR_024429;NR_015429
4582	cg10775229	0.048247	0.0155234	chr10	GRID1	NM_017551
4607	cg10844272	-0.00850357	0.0176779	chr10
4636	cg10911365	-0.0123458	0.0350119	chr10	COL17A1	NM_000494
4651	cg10963664	-0.0134592	0.0332573	chr10	DUSP13;DUSP13;DUSP13;DUSP13;DUSP13	NM_016364;NM_016364;NM_001007273;NM_001007272;NM_001007271
4673	cg11009695	-0.0400073	0.00827796	chr10
4676	cg11018337	-0.0135339	0.0470023	chr10	FLJ45983;GATA3;GATA3;FLJ45983	NR_024256;NM_002051;NM_001002295;NR_024255
4726	cg11185335	-0.00751034	0.0417082	chr10
4805	cg11378840	0.00646584	0.0258395	chr10	HHEX	NM_002729
4812	cg11400759	-0.00684918	0.0397451	chr10
4816	cg11411220	0.0873707	0.0251688	chr10	CCNY;CCNY	NM_145012;NM_181698
4824	cg11426080	0.0231	0.0291255	chr10
4826	cg11430259	0.0720581	0.0266844	chr10	FGFR2;FGFR2;FGFR2;FGFR2;FGFR2;FGFR2	NM_000141;NM_001144917;NM_022970;NM_001144918;NM_001144919;NM_001144915
4851	cg11480762	0.0309037	0.0159876	chr10	SLC29A3	NM_018344
4854	cg11486694	-0.0321135	0.0184474	chr10	PRKG1;PRKG1	NM_001098512;NM_006258
4861	cg11510931	-0.0170496	0.0283137	chr10
4866	cg11518184	0.0106169	0.0414055	chr10
4895	cg11596479	-0.0112668	0.0145341	chr10
4903	cg11613559	0.0373301	0.0364828	chr10	INPP5F;INPP5F	NM_014937;NR_003252
4912	cg11626582	-0.00812422	0.0273731	chr10
4917	cg11633461	0.0475508	0.0164188	chr10	C10orf54;CDH23	NM_022153;NM_022124
4962	cg11716380	0.0458888	0.0132855	chr10	KNDC1	NM_152643
4998	cg11801857	0.0237512	0.0441784	chr10	CHST3	NM_004273
5010	cg11820931	-0.0312305	0.016144	chr10	DDX21	NM_004728
5019	cg11849692	0.0478857	0.0207196	chr10	LDB1;LDB1	NM_001113407;NM_003893
5032	cg11864574	0.100656	0.045064	chr10	SPAG6;SPAG6	NM_012443;NM_172242
5044	cg11895240	-0.0171591	0.0428769	chr10	SEC61A2;SEC61A2;SEC61A2;SEC61A2;SEC61A2	NM_001142628;NM_001142627;NR_024576;NR_024577;NM_018144
5075	cg11975206	-0.0197911	0.0498321	chr10	PAOX;PAOX;PAOX	NM_152911;NM_207128;NM_207127
5153	cg12204732	0.0196979	0.0450963	chr10	DOCK1;FAM196A	NM_001380;NM_001039762
5200	cg12377401	-0.00693775	0.0227695	chr10
5208	cg12391279	-0.02955	0.0176144	chr10
5230	cg12465710	0.0316671	0.0464593	chr10	UTF1	NM_003577
5247	cg12497543	0.0595176	0.0476919	chr10	ENTPD1;ENTPD1;ENTPD1;ENTPD1;ENTPD1;ENTPD1;ENTPD1	NM_001164182;NM_001164178;NM_001776;NM_001164183;NM_001164179;NM_001164181;NM_001098175
5258	cg12521736	-0.00861527	0.0320139	chr10
5273	cg12569119	-0.0447405	0.032048	chr10	SH3PXD2A	NM_014631
5291	cg12623982	0.0579015	0.0414711	chr10	EMX2OS	NR_002791
5306	cg12667595	0.102222	0.043927	chr10
5327	cg12736773	-0.0218118	0.0220012	chr10
5330	cg12752627	0.0857788	0.0444214	chr10	CYP26C1	NM_183374
5336	cg12766310	-0.0147217	0.0155144	chr10
5358	cg12868173	0.0165269	0.0467425	chr10
5497	cg13269555	0.0493715	0.0307439	chr10	KAZALD1	NM_030929
5525	cg13327545	0.0501755	0.00882213	chr10
5527	cg13331196	0.0721545	0.023536	chr10
5541	cg13370460	0.0726868	0.0142678	chr10
5545	cg13387972	-0.0125598	0.0296331	chr10	DIP2C	NM_014974
5551	cg13399203	-0.0763797	0.0165604	chr10
5612	cg13553455	-0.027918	0.00997808	chr10	COL17A1	NM_000494
5615	cg13556079	-0.0394241	0.0144788	chr10
5695	cg13707005	-0.00952123	0.0270311	chr10	CUGBP2;CUGBP2;CUGBP2;CUGBP2	NM_001025076;NM_006561;NM_001025077;NM_001083591
5722	cg13770865	-0.0213564	0.0341572	chr10	SGPL1	NM_003901
5767	cg13889750	-0.0117871	0.0329793	chr10
5799	cg13967414	-0.0391664	0.0287515	chr10
5833	cg14043803	-0.0216591	0.00951689	chr10
5878	cg14151372	-0.0259021	0.0179938	chr10
5882	cg14156751	0.0565232	0.0297075	chr10
5954	cg14308082	0.0404116	0.0135388	chr10
5957	cg14317457	0.00973986	0.0366275	chr10	RASGEF1A	NM_145313
5971	cg14353649	0.0342737	0.032392	chr10	PAOX;PAOX;PAOX	NM_152911;NM_207128;NM_207127
5972	cg14354327	0.0277681	0.0186867	chr10
6000	cg14435498	0.0553369	0.037802	chr10
6002	cg14438812	-0.0117291	0.0142678	chr10	DIP2C	NM_014974
6016	cg14475478	-0.0395751	0.00839108	chr10	NEURL	NM_004210
6023	cg14491482	-0.00955602	0.0135641	chr10	GRK5	NM_005308
6071	cg14581419	0.1102	0.0343244	chr10	PSD	NM_002779
6086	cg14606586	0.0204634	0.0366284	chr10
6106	cg14650244	-0.0502198	0.0285519	chr10
6155	cg14778235	-0.0182437	0.0381891	chr10	PAX2;PAX2;PAX2;PAX2;PAX2	NM_003988;NM_000278;NM_003990;NM_003989;NM_003987
6197	cg14896134	0.0629699	0.0412716	chr10
6200	cg14899131	-0.0323308	0.0285001	chr10	PLXDC2	NM_032812
6295	cg15209053	-0.0293457	0.0273189	chr10	GRID1	NM_017551
6305	cg15227994	-0.0686672	0.019475	chr10
6322	cg15249357	0.0266035	0.0467385	chr10
6331	cg15280185	-0.0325549	0.0253758	chr10
6334	cg15292765	0.0151964	0.0377968	chr10	PARD3	NM_019619
6338	cg15298486	-0.0610576	0.0210411	chr10	BLOC1S2;BLOC1S2	NM_173809;NM_001001342
6345	cg15320455	0.00831646	0.0402454	chr10	LDB1;LDB1	NM_001113407;NM_001113407
6407	cg15511801	0.0325583	0.0494754	chr10
6414	cg15526213	0.0396221	0.018069	chr10
6420	cg15544637	0.0164379	0.0354557	chr10	ATAD1	NM_032810
6422	cg15550234	-0.0141219	0.0151396	chr10
6425	cg15553532	-0.0130882	0.031043	chr10
6435	cg15574316	-0.00599306	0.0414711	chr10
6448	cg15615645	-0.0280708	0.00969392	chr10	C10orf26;C10orf26	NM_017787;NM_001083913
6464	cg15658978	-0.00975836	0.0350961	chr10	FRMD4A	NM_018027
6485	cg15713378	-0.0188266	0.0341324	chr10	DIP2C;C10orf108	NM_014974;NR_027152
6487	cg15721134	0.0558803	0.0371563	chr10
6490	cg15734764	-0.0347505	0.016451	chr10
6499	cg15748507	0.0261289	0.0396128	chr10	PRLHR	NM_004248
6507	cg15772157	0.0764232	0.0193229	chr10
6541	cg15861156	-0.0134095	0.0156075	chr10
6575	cg15960297	-0.00554242	0.0470283	chr10	C10orf18	NM_017782
6589	cg15996984	0.0345411	0.0312238	chr10	HPSE2;HPSE2;HPSE2;HPSE2	NM_001166244;NM_001166245;NM_021828;NM_001166246
6604	cg16048421	-0.0077947	0.0304575	chr10
6612	cg16060369	0.0520638	0.0263238	chr10	RASGEF1A	NM_145313
6615	cg16063747	0.0153171	0.0261634	chr10	EMX2OS	NR_002791
6620	cg16072535	-0.0268098	0.040107	chr10
6625	cg16088251	0.0113179	0.0403416	chr10	ADK;ADK	NM_006721;NM_001123
6699	cg16271833	-0.00970133	0.0489645	chr10
6709	cg16300094	-0.0061219	0.045064	chr10	ENTPD1	NM_001098175
6730	cg16358257	-0.0201268	0.0425383	chr10	ADRA2A	NM_000681
6746	cg16401207	-0.0511776	0.00995336	chr10	PRKG1;PRKG1	NM_001098512;NM_006258
6780	cg16470772	-0.0269847	0.0138099	chr10
6815	cg16558695	-0.0279869	0.0407726	chr10
6821	cg16570507	0.0627038	0.0464593	chr10	MIR346;GRID1	NR_029907;NM_017551
6823	cg16574134	0.0189277	0.0116434	chr10	PAX2;PAX2;PAX2;PAX2;PAX2	NM_003988;NM_000278;NM_003990;NM_003989;NM_003987
6850	cg16622520	-0.0125444	0.0456677	chr10	SORBS1;SORBS1	NM_015385;NM_024991
6931	cg16885557	-0.0118774	0.044231	chr10
6981	cg17056676	-0.0396111	0.0427385	chr10	ABLIM1;ABLIM1;ABLIM1	NM_001003408;NM_001003407;NM_002313
6986	cg17077610	0.0330071	0.0297837	chr10
6995	cg17098147	0.0190228	0.0313877	chr10	SPAG6;SPAG6	NM_172242;NM_012443
7000	cg17112382	-0.0262186	0.0138161	chr10
7004	cg17124583	-0.0200303	0.0315862	chr10	GATA3;GATA3	NM_001002295;NM_002051
7032	cg17217834	-0.0120309	0.0234013	chr10
7039	cg17235151	-0.0330098	0.0200403	chr10	PPP2R2D;PPP2R2D;PPP2R2D	NR_033191;NM_001003656;NM_018461
7050	cg17292610	0.0199919	0.0480839	chr10	DUSP13;DUSP13;DUSP13;DUSP13	NM_001007273;NM_016364;NM_001007272;NM_001007271
7118	cg17485681	0.0807617	0.0388195	chr10	CDH23	NM_022124
7187	cg17694495	-0.0257003	0.0490221	chr10	WAPAL	NM_015045
7201	cg17729694	-0.0171955	0.0306568	chr10	GRID1	NM_017551
7212	cg17766305	0.0841891	0.0381328	chr10	RNLS;RNLS	NM_001031709;NM_018363
7218	cg17789273	0.0159518	0.0299681	chr10
7232	cg17833578	-0.012793	0.0489934	chr10	LRIT1	NM_015613
7234	cg17837712	-0.00847451	0.0404458	chr10	FAM24B;LOC399815	NM_152644;NR_027282
7256	cg17886420	0.0992576	0.0427525	chr10
7260	cg17900199	-0.041685	0.025229	chr10	WDR37	NM_014023
7263	cg17905462	-0.0217959	0.04484	chr10
7265	cg17911420	-0.0224964	0.0302633	chr10	TCERG1L	NM_174937
7270	cg17921439	-0.0143932	0.0170622	chr10	C10orf90	NM_001004298
7280	cg17962384	0.0318905	0.00712364	chr10	KCNIP2;KCNIP2;KCNIP2;KCNIP2;KCNIP2;KCNIP2	NM_173195;NM_173191;NM_173193;NM_173192;NM_014591;NM_173197
7310	cg18040225	0.0450124	0.0425863	chr10	CCNJ;CCNJ;CCNJ	NM_001134376;NM_001134375;NM_019084
7381	cg18240400	0.0450446	0.00732222	chr10	ANUBL1;ANUBL1	NM_001128324;NM_174890
7382	cg18247055	0.0266738	0.0230773	chr10	SPAG6;SPAG6	NM_012443;NM_172242
7401	cg18325841	-0.00999944	0.0414787	chr10	ARHGAP21	NM_020824
7440	cg18430255	-0.0264719	0.0376504	chr10	GRK5	NM_005308
7484	cg18534077	0.0575472	0.0215619	chr10	AS3MT	NM_020682
7487	cg18537454	0.0418208	0.0214183	chr10
7497	cg18564458	-0.0302846	0.0151991	chr10	CYP2C19	NM_000769
7503	cg18591441	-0.0173218	0.0465129	chr10	CCDC109A	NM_138357
7523	cg18641876	-0.10285	0.0295156	chr10	AKR1C2;AKR1C2	NM_205845;NM_001354
7595	cg18873909	-0.0143342	0.0431743	chr10	PARG	NM_003631
7600	cg18882449	-0.0303851	0.0241507	chr10	NT5C2;NT5C2	NM_001134373;NM_012229
7622	cg18959207	0.0621182	0.0484809	chr10	CACNB2;CACNB2;CACNB2;CACNB2;CACNB2;CACNB2;CACNB2;CACNB2	NM_000724;NM_201593;NM_201572;NM_000724;NM_201571;NM_201597;NM_201596;NM_001167945
7679	cg19147990	0.0264853	0.0151396	chr10	CDK1;CDC2;CDK1;CDK1;CDK1	NM_001170406;NM_001130829;NM_033379;NM_001170407;NM_001786
7682	cg19161112	0.0108293	0.0498528	chr10	PTF1A	NM_178161
7700	cg19223064	0.0595446	0.0420834	chr10
7701	cg19223119	-0.0457532	0.0158372	chr10	DIP2C	NM_014974
7702	cg19225923	-0.0154324	0.0368445	chr10	GTPBP4	NM_012341
7708	cg19254282	-0.0265861	0.00827796	chr10
7726	cg19335412	-0.0459572	0.0149938	chr10	ACTA2;ACTA2	NM_001613;NM_001141945
7760	cg19448497	-0.00571117	0.0420381	chr10
7794	cg19528373	-0.0156376	0.0155234	chr10	IPMK	NM_152230
7823	cg19612504	-0.0186773	0.0135388	chr10	CDH23	NM_022124
7843	cg19657198	0.0258653	0.0215504	chr10	FLJ45983;FLJ45983	NR_024256;NR_024255
7854	cg19694241	-0.0269793	0.00762636	chr10	C10orf95	NM_024886
7867	cg19730814	-0.00597736	0.042539	chr10	KCNMA1;KCNMA1;KCNMA1;KCNMA1	NM_001161353;NM_001161352;NM_002247;NM_001014797
7883	cg19779893	-0.0274627	0.0442665	chr10	ADAMTS14;ADAMTS14	NM_080722;NM_139155
7919	cg19876302	-0.018321	0.0352497	chr10
7929	cg19910327	-0.0116647	0.0434997	chr10	PIPSL	NR_002319
7956	cg19994384	-0.0555107	0.0420381	chr10
7957	cg19996026	-0.0162941	0.0292038	chr10	CTNNA3;CTNNA3	NM_013266;NM_013266
7958	cg19997922	0.0259072	0.0128045	chr10	CCNY	NM_181698
7970	cg20038187	-0.0273219	0.00698289	chr10
8004	cg20127733	-0.0188228	0.019645	chr10
8005	cg20130213	0.0329891	0.0444914	chr10	FRMD4A	NM_018027
8015	cg20151301	-0.0476141	0.0132369	chr10	ADARB2	NM_018702
8020	cg20168761	-0.0235873	0.0220012	chr10
8030	cg20210689	-0.0100681	0.0381488	chr10	INPP5A	NM_005539
8059	cg20286882	-0.0339755	0.0347194	chr10
8088	cg20353480	-0.0201668	0.039011	chr10	CDC2;CDK1;CDK1;CDK1;CDK1	NM_001130829;NM_033379;NM_001170407;NM_001170406;NM_001786
8092	cg20365618	0.0249563	0.0435582	chr10	INPP5F;INPP5F	NM_014937;NR_003252
8168	cg20613259	0.0114127	0.0375096	chr10	NT5C2;NT5C2	NM_001134373;NM_012229
8171	cg20621021	-0.0684019	0.00712364	chr10	EIF4EBP2	NM_004096
8182	cg20668662	0.0203683	0.0368346	chr10	SH3PXD2A	NM_014631
8804	cg22548109	-0.0186872	0.0133359	chr10	CTBP2;CTBP2	NM_001083914;NM_001329
8812	cg22569359	0.0158531	0.0399743	chr10
8815	cg22579265	0.0321734	0.0316309	chr10
8820	cg22601058	-0.00754193	0.0413197	chr10	LOC283070	NR_027322
8831	cg22633280	0.0316806	0.0466021	chr10
8832	cg22647713	-0.0145765	0.0369394	chr10	FLJ45983;GATA3;GATA3;FLJ45983	NR_024255;NM_002051;NM_001002295;NR_024256
8839	cg22655696	-0.013605	0.0418645	chr10	EBF3	NM_001005463
8884	cg22788080	-0.0250753	0.00864776	chr10	ERCC6	NM_000124
8913	cg22876659	-0.0115259	0.0461463	chr10
8921	cg22889322	-0.0396034	0.0216922	chr10	AGAP7	NM_001077685
8923	cg22892607	0.0208308	0.0436237	chr10	GATA3;GATA3	NM_001002295;NM_002051
8980	cg23087306	0.0287747	0.0339648	chr10	EMX2OS	NR_002791
8994	cg23127694	-0.0153461	0.0263238	chr10	GRK5	NM_005308
9019	cg23181554	0.0513716	0.0263238	chr10
9040	cg23223933	0.0481459	0.0179735	chr10	KCNIP2;KCNIP2;KCNIP2;KCNIP2;KCNIP2;KCNIP2	NM_173193;NM_173195;NM_173197;NM_173191;NM_014591;NM_173192
9063	cg23322172	0.0311777	0.0399501	chr10	TMEM180	NM_024789
9089	cg23404973	-0.00960583	0.022687	chr10	PDLIM1	NM_020992
9184	cg23639922	-0.0109061	0.0313877	chr10	PPRC1	NM_015062
9188	cg23647784	-0.0173593	0.0341031	chr10	KIAA1217	NM_001098500
9206	cg23697796	-0.0270811	0.0320708	chr10	LOC100188947	NR_024467
9230	cg23801028	0.0860008	0.0106265	chr10	CRTAC1	NM_018058
9235	cg23834813	-0.0270935	0.0222578	chr10	SH2D4B;SH2D4B	NM_207372;NM_001145719
9264	cg23911808	0.021998	0.0269691	chr10
9283	cg23963984	-0.0241737	0.0387752	chr10	DLG5	NM_004747
9296	cg23994051	-0.0281039	0.0198982	chr10	RBM20	NM_001134363
9315	cg24051456	0.0339911	0.00948034	chr10	FAM45B;FAM45A	NR_027141;NM_207009
9361	cg24201941	-0.0364228	0.0196617	chr10	CRTAC1	NM_018058
9374	cg24243914	-0.00944258	0.0221794	chr10	PAPSS2;PAPSS2	NM_004670;NM_001015880
9410	cg24351003	0.0251532	0.0470874	chr10	GRID1	NM_017551
9443	cg24445116	-0.0112507	0.0159127	chr10
9479	cg24539517	0.0267257	0.0443235	chr10	GRK5	NM_005308
9490	cg24564492	0.034384	0.0143676	chr10
9494	cg24571875	-0.0184067	0.0161359	chr10	PNLIP	NM_000936
9495	cg24571899	-0.0130858	0.0387752	chr10	ANK3	NM_020987
9497	cg24588148	-0.00803152	0.0376115	chr10	NUDT9P1	NR_002779
9509	cg24621437	0.0151845	0.0344743	chr10	SORCS1;SORCS1	NM_001013031;NM_052918
9571	cg24747866	-0.0141971	0.028198	chr10	STK32C	NM_173575
9583	cg24789723	0.0317933	0.0448793	chr10
9623	cg24913868	-0.0386097	0.0156787	chr10	NKX2-3	NM_145285
9634	cg24949488	-0.0200454	0.0421114	chr10	DNTT;DNTT	NM_001017520;NM_004088
9656	cg25024345	-0.00708882	0.0346284	chr10	INPP5A	NM_005539
9667	cg25045785	0.0310428	0.0296289	chr10	INPP5F;INPP5F	NM_014937;NR_003252
9673	cg25056460	0.0474012	0.00953676	chr10	PPAPDC1A	NM_001030059
9674	cg25063211	-0.0175615	0.029052	chr10	MGMT	NM_002412
9680	cg25083618	0.0401896	0.0219715	chr10	CYP26C1	NM_183374
9693	cg25123470	-0.0440607	0.0378049	chr10	KCNIP2;KCNIP2;KCNIP2;KCNIP2;KCNIP2;KCNIP2	NM_173195;NM_173192;NM_173191;NM_173193;NM_014591;NM_173197
9731	cg25239156	0.063642	0.0214266	chr10
9734	cg25265769	-0.0254112	0.0470076	chr10	CTNNA3;CTNNA3	NM_001127384;NM_013266
9735	cg25268100	-0.0120429	0.0123482	chr10	INPP5A	NM_005539
9816	cg25488288	-0.0140834	0.0324043	chr10	DIP2C	NM_014974
9824	cg25523538	-0.0202039	0.0200885	chr10	MKX	NM_173576
9863	cg25605038	-0.0333662	0.0307612	chr10	SUFU	NM_016169
9908	cg25718035	0.0110606	0.0278452	chr10
9910	cg25721744	-0.0339097	0.0280274	chr10	LZTS2	NM_032429
9911	cg25726847	-0.0109111	0.0331104	chr10	MAT1A	NM_000429
9917	cg25745697	-0.0268663	0.0335298	chr10	C10orf93	NM_173572
9939	cg25812683	-0.0104785	0.0165149	chr10
9995	cg25995980	0.0199221	0.0422407	chr10	GPRIN2	NM_014696
10004	cg26014391	0.016783	0.0176544	chr10	PHYHIPL;PHYHIPL;PHYHIPL	NM_032439;NM_001143774;NM_032439
10007	cg26023709	-0.0140222	0.00951689	chr10	MRPL43;SEMA4G;MRPL43;MRPL43	NM_176794;NM_017893;NM_176792;NM_176793
10027	cg26101714	-0.00501216	0.0491097	chr10
10050	cg26154937	0.00590721	0.0447898	chr10	ARHGAP22	NM_021226
10059	cg26167841	0.0944942	0.0166067	chr10
10061	cg26170647	-0.0433274	0.0203788	chr10
10085	cg26236741	-0.0224462	0.0296166	chr10
10099	cg26268044	0.0227929	0.0468173	chr10	CCNJ;CCNJ;CCNJ	NM_001134376;NM_001134375;NM_019084
10133	cg26361041	-0.0256819	0.0158372	chr10	ADARB2	NM_018702
10142	cg26394196	-0.0280068	0.010403	chr10	ADARB2	NM_018702
10170	cg26492368	0.0594212	0.0106192	chr10	SPAG6;SPAG6	NM_012443;NM_172242
10175	cg26509965	0.0245311	0.0255622	chr10
10188	cg26550162	0.031027	0.0442887	chr10	NEURL	NM_004210
10200	cg26603656	0.0711625	0.0314918	chr10
10251	cg26771998	-0.0226511	0.0207883	chr10	BMS1P4	NR_026592
10265	cg26807432	-0.0110054	0.0213742	chr10	DIP2C	NM_014974
10289	cg26872151	-0.0103132	0.0230837	chr10	PIP4K2A	NM_005028
10409	cg27249858	0.069899	0.0075467	chr10
10415	cg27266257	0.0573351	0.0356342	chr10	ASB13;ASB13	NR_024581;NM_024701
10426	cg27297123	0.0791928	0.0151396	chr10
10429	cg27303223	0.075363	0.0335217	chr10	MKX	NM_173576
10470	cg27407423	-0.0369319	0.0444914	chr10	GDI2;GDI2	NM_001494;NM_001115156
10474	cg27412857	0.0822358	0.0076327	chr10
10514	cg27543739	0.0202447	0.042009	chr10	IDE	NM_004969
10571	ch.10.896173F	0.0810392	0.0118462	chr10	CREM;CREM;CREM;CREM;CREM;CREM;CREM;CREM	NM_181571;NM_182850;NM_182853;NM_183011;NM_183013;NM_183012;NM_183060;NM_001881
34	cg00074348	-0.0314983	0.048745	chr11	APLNR;APLNR	NM_005161;NR_027991
109	cg00220455	0.0236164	0.0351408	chr11	TBC1D10C	NM_198517
110	cg00220721	-0.0962129	0.0209237	chr11	PRR5L;PRR5L;PRR5L;PRR5L	NM_024841;NM_001160167;NM_001160169;NM_001160168
113	cg00227110	-0.00956002	0.0230837	chr11
141	cg00301033	-0.0172651	0.0157885	chr11	TTC17	NM_018259
156	cg00337558	-0.0135483	0.0161769	chr11	PKNOX2	NM_022062
163	cg00350448	-0.0521962	0.0448983	chr11	ARAP1;ARAP1;ARAP1	NM_001040118;NM_001135190;NM_015242
169	cg00367424	-0.0200974	0.0273815	chr11	HCCA2	NM_053005
191	cg00409521	0.0185146	0.0462485	chr11	CHORDC1;CHORDC1;CHORDC1;CHORDC1	NM_001144073;NM_012124;NM_012124;NM_001144073
195	cg00417304	-0.044808	0.0414787	chr11	PRDM11	NM_020229
213	cg00468091	0.00772739	0.0410481	chr11	KIF18A	NM_031217
218	cg00478851	-0.0498841	0.0488593	chr11	PPFIBP2	NM_003621
226	cg00489660	-0.0320264	0.0218972	chr11	TNKS1BP1	NM_033396
235	cg00509485	-0.0864401	0.00719199	chr11
240	cg00518276	-0.0319633	0.0327224	chr11
276	cg00599559	-0.0220662	0.0177102	chr11	GUCY2E	NR_024042
346	cg00748218	-0.049292	0.018468	chr11	NAV2	NM_001111018
360	cg00769843	0.0396432	0.0330845	chr11	OTUB1;OTUB1	NM_017670;NR_003089
394	cg00849025	-0.0560784	0.0236761	chr11	OR5B3	NM_001005469
433	cg00925229	-0.0146087	0.0444494	chr11	BAD;GPR137;GPR137;BAD;GPR137;GPR137;GPR137	NM_032989;NM_020155;NM_001170726;NM_004322;NM_001170880;NM_001170881;NM_001170881
503	cg01062980	0.00869081	0.0376504	chr11	LRTOMT;LRTOMT;LRTOMT;LRTOMT;LRTOMT;NUMA1;LRTOMT;LRTOMT;LRTOMT;LRTOMT;LRTOMT;LRTOMT	NM_001145308;NM_001145309;NM_001145307;NR_026886;NM_001145307;NM_006185;NM_145309;NM_001145310;NM_001145310;NM_001145308;NM_145309;NM_001145309
541	cg01135800	-0.0135363	0.0478651	chr11	SLC22A9	NM_080866
605	cg01257383	-0.0508849	0.014978	chr11	CHRM4	NM_000741
687	cg01421380	-0.0297641	0.0494481	chr11	UBXN1	NM_015853
696	cg01434121	-0.0300007	0.0308139	chr11	SLC37A4;SLC37A4;SLC37A4;SLC37A4;SLC37A4	NM_001164277;NM_001164279;NM_001467;NM_001164278;NM_001164280
710	cg01469847	0.101454	0.0420381	chr11	HCCA2	NM_053005
715	cg01485439	-0.0100406	0.0351157	chr11	CABP4	NM_145200
766	cg01594514	-0.015675	0.0356116	chr11	NDUFV1;NDUFV1	NM_001166102;NM_007103
853	cg01823718	-0.0189151	0.0366834	chr11
866	cg01849093	-0.0465351	0.00929339	chr11
876	cg01878761	-0.0116802	0.0439122	chr11	DSCAML1	NM_020693
878	cg01879488	0.0506873	0.0235294	chr11	CD44;CD44;CD44;CD44;CD44;CD44;CD44;CD44;CD44;CD44	NM_001001389;NM_001001390;NM_001001391;NM_000610;NM_001001392;NM_001001392;NM_001001391;NM_000610;NM_001001389;NM_001001390
896	cg01910617	-0.017268	0.0350119	chr11	AHNAK;AHNAK	NM_024060;NM_001620
929	cg01989504	0.0146238	0.0484809	chr11	MUC5B	NM_002458
930	cg01991582	0.0131552	0.0307403	chr11	CD82;CD82;CD82;CD82	NM_002231;NM_001024844;NM_001024844;NM_002231
936	cg02002164	-0.00634189	0.0315516	chr11	CSRP3;CSRP3;CSRP3;CSRP3	NM_003476;NM_001127656;NM_003476;NM_001127656
945	cg02023548	-0.0508346	0.00712364	chr11	MRGPRD	NM_198923
977	cg02104130	-0.00986985	0.0395702	chr11	PEX16;PEX16	NM_004813;NM_057174
991	cg02122336	-0.0106253	0.0368917	chr11
1006	cg02141716	0.0380631	0.0491299	chr11	RNF169	NM_001098638
1023	cg02178846	-0.0394438	0.012497	chr11
1039	cg02224369	-0.0564268	0.0148643	chr11	CD59;CD59;CD59;CD59	NM_000611;NM_203330;NM_203329;NM_203331
1062	cg02265742	-0.0389358	0.0147741	chr11
1085	cg02318971	0.016636	0.0454714	chr11
1116	cg02407032	-0.0147468	0.0408344	chr11	KBTBD4;KBTBD4;NDUFS3;KBTBD4	NM_016506;NM_018095;NM_004551;NR_024222
1138	cg02468154	-0.0226105	0.0379618	chr11	HSD17B12	NM_016142
1176	cg02556071	-0.0134294	0.043746	chr11	CARD18	NM_021571
1195	cg02603756	-0.00899223	0.0174731	chr11	WNT11	NM_004626
1246	cg02685484	-0.0303373	0.0388465	chr11	PTPRCAP	NM_005608
1278	cg02743674	-0.0469214	0.0404319	chr11	TRPM5	NM_014555
1300	cg02809401	-0.023272	0.0116741	chr11	LTBP3;LTBP3;LTBP3	NM_021070;NM_001130144;NM_001164266
1325	cg02870584	-0.0309722	0.0269992	chr11	DKFZp761E198	NM_138368
1333	cg02891082	-0.00872718	0.0333803	chr11	LRP5	NM_002335
1363	cg02940362	-0.021469	0.0405047	chr11	MMP26	NM_021801
1367	cg02946294	0.0476553	0.0461079	chr11	PLEKHA7	NM_175058
1378	cg02965699	0.0159774	0.0455022	chr11	PHF21A;PHF21A	NM_016621;NM_001101802
1403	cg03037761	-0.017734	0.0343294	chr11	FZD4	NM_012193
1438	cg03106245	0.0744924	0.0360917	chr11	SPI1;SPI1;SPI1;SPI1	NM_001080547;NM_003120;NM_001080547;NM_003120
1441	cg03115072	-0.0151464	0.0349542	chr11	BET1L;BET1L;RIC8A	NM_001098787;NM_016526;NM_021932
1446	cg03127898	0.051835	0.0363554	chr11	LRRN4CL	NM_203422
1449	cg03132935	0.0395134	0.0370051	chr11	SLC37A4;SLC37A4;SLC37A4;SLC37A4;SLC37A4	NM_001164277;NM_001164279;NM_001467;NM_001164278;NM_001164280
1462	cg03161498	-0.00713065	0.043498	chr11
1477	cg03200166	0.0354242	0.0076327	chr11	SYT7	NM_004200
1512	cg03263716	-0.0152513	0.0231627	chr11	NRXN2;NRXN2	NM_138732;NM_015080
1518	cg03267954	-0.0644775	0.00762636	chr11	UNC93B1	NM_030930
1520	cg03272264	-0.00723837	0.0209141	chr11	KRTAP5-8	NM_021046
1568	cg03364891	-0.0107835	0.01045	chr11	AMBRA1	NM_017749
1576	cg03386765	0.021463	0.0347913	chr11	CXCR5;CXCR5	NM_001716;NM_032966
1582	cg03402922	-0.0110957	0.044581	chr11	LRP5	NM_002335
1631	cg03522668	-0.0125343	0.0354848	chr11	MRGPRF;MRGPRF	NM_001098515;NM_145015
1692	cg03603211	0.045845	0.0228976	chr11	MYO7A;MYO7A;MYO7A	NM_000260;NM_001127180;NM_001127179
1703	cg03627015	0.0930639	0.0140729	chr11	PLA2G16;PLA2G16	NM_007069;NM_001128203
1707	cg03632278	-0.0107987	0.0158103	chr11
1745	cg03717994	-0.00947593	0.0421662	chr11
1772	cg03771580	-0.0187418	0.022075	chr11	OR5A2	NM_001001954
1784	cg03800939	0.0469363	0.0366834	chr11	SLC37A2;SLC37A2	NM_198277;NM_001145290
1789	cg03807883	-0.00727705	0.027952	chr11
1808	cg03881961	0.0162595	0.048702	chr11	APLP2;APLP2;APLP2;APLP2;APLP2;APLP2;APLP2;APLP2;APLP2;APLP2	NR_024516;NR_024515;NM_001142278;NM_001142278;NM_001142276;NM_001642;NM_001642;NM_001142276;NM_001142277;NM_001142277
1817	cg03908908	0.0435617	0.00827796	chr11	MYO7A;MYO7A;MYO7A	NM_000260;NM_001127180;NM_001127179
1854	cg03994942	0.0381508	0.0248387	chr11	GYLTL1B	NM_152312
1872	cg04033857	-0.0127774	0.0367593	chr11
1879	cg04053776	-0.0466513	0.0266538	chr11	ZNF215	NM_013250
1881	cg04057766	-0.0232407	0.0305541	chr11	PPP1R14B	NM_138689
1882	cg04058752	0.0541239	0.0239423	chr11	B3GNT6	NM_138706
1892	cg04074454	-0.0258816	0.0426293	chr11	C11orf9;C11orf9	NM_013279;NM_001127392
1918	cg04137004	-0.0307193	0.0288483	chr11
1937	cg04170359	-0.0144996	0.0454129	chr11
1938	cg04174091	-0.0487189	0.019283	chr11
1940	cg04176122	0.0227284	0.0366284	chr11	BCL9L	NM_182557
1945	cg04181189	-0.012589	0.0140729	chr11	PRDM10;PRDM10;PRDM10;PRDM10;PRDM10;PRDM10	NM_199438;NM_199439;NM_199437;NM_020228;NM_199439;NM_199438
1952	cg04191712	-0.0302009	0.0352432	chr11	TBX10	NM_005995
1962	cg04212127	-0.0234264	0.0317931	chr11	ODZ4	NM_001098816
1965	cg04216240	-0.015211	0.0176779	chr11	RHOD	NM_014578
1986	cg04272969	-0.0165542	0.0269691	chr11	SMPD1;SMPD1;SMPD1	NM_000543;NM_001007593;NR_027400
2018	cg04338966	-0.0264698	0.0455723	chr11	HMBS	NM_000190
2030	cg04363513	0.0383495	0.0313328	chr11	MEN1;MEN1;MEN1;MEN1;MEN1;MEN1;MEN1;MAP4K2	NM_130802;NM_130801;NM_130803;NM_000244;NM_130800;NM_130799;NM_130804;NM_004579
2036	cg04383058	-0.0391106	0.0323625	chr11	PITPNM1;PITPNM1	NM_004910;NM_001130848
2044	cg04396314	0.00887867	0.0448337	chr11	SCYL1;SCYL1	NM_020680;NM_001048218
2070	cg04450855	-0.0355765	0.0253726	chr11	DENND5A	NM_015213
2073	cg04452906	-0.0280683	0.0226633	chr11	KCNJ5	NM_000890
2078	cg04464446	0.0464152	0.032159	chr11	GAL	NM_015973
2079	cg04469731	0.0558824	0.0136815	chr11	APLP2;APLP2;APLP2;APLP2;APLP2;APLP2	NR_024516;NR_024515;NM_001142276;NM_001642;NM_001142277;NM_001142278
2095	cg04499701	-0.00692903	0.0290519	chr11
2108	cg04523868	0.0338709	0.0149958	chr11	MAP4K2	NM_004579
2113	cg04539895	-0.04104	0.0254061	chr11
2118	cg04552555	0.0460831	0.0118031	chr11	HCCA2	NM_053005
2119	cg04552585	-0.00897758	0.0453552	chr11
2143	cg04607699	-0.0291331	0.0157334	chr11	OR4S1	NM_001004725
2156	cg04642741	0.0839847	0.0499663	chr11	SLC6A5	NM_004211
2164	cg04663194	0.0202207	0.0433857	chr11	ACTN3	NM_001104
2194	cg04740205	-0.0735984	0.00134553	chr11	PCF11	NM_015885
2252	cg04874562	-0.0506965	0.0318209	chr11	OR51I1	NM_001005288
2270	cg04907173	0.0501299	0.0288491	chr11	POLA2	NM_002689
2310	cg05004506	-0.0408857	0.0243827	chr11	OR51G1	NM_001005237
2353	cg05107632	-0.00872435	0.0180952	chr11	ORAOV1	NM_153451
2358	cg05127380	0.0197225	0.0471657	chr11	STIP1;STIP1	NM_006819;NM_006819
2359	cg05130679	-0.0315119	0.0152489	chr11	AMOTL1	NM_130847
2386	cg05179125	0.0600821	0.0136807	chr11	HRASLS5;HRASLS5;HRASLS5	NM_001146729;NM_054108;NM_001146728
2440	cg05315670	-0.0175018	0.0170635	chr11	BAD;BAD	NM_032989;NM_004322
2478	cg05402062	-0.054753	0.0276037	chr11	OR4S1	NM_001004725
2479	cg05405550	-0.00648484	0.0350119	chr11
2505	cg05469285	0.024993	0.0333354	chr11	DBX1	NM_001029865
2523	cg05519002	-0.0161219	0.040335	chr11	TUB;TUB	NM_177972;NM_003320
2532	cg05555951	-0.0112435	0.0163043	chr11	OR8H2	NM_001005200
2565	cg05650911	-0.0530217	0.0300025	chr11	C11orf84	NM_138471
2583	cg05714094	-0.0250832	0.0455821	chr11	RNF214;PCSK7;RNF214	NM_207343;NM_004716;NM_001077239
2597	cg05768922	0.0442188	0.0163856	chr11	HEPACAM	NM_152722
2616	cg05809890	-0.0278994	0.00953676	chr11	HCCA2	NM_053005
2635	cg05868564	0.036071	0.0154832	chr11
2651	cg05898618	-0.0177809	0.013741	chr11	KCNQ1;KCNQ1	NM_000218;NM_181798
2672	cg05935961	-0.0156888	0.0209618	chr11
2674	cg05942610	-0.018033	0.0266743	chr11	ODZ4	NM_001098816
2679	cg05952572	0.0357126	0.0211788	chr11	PDE2A;PDE2A;PDE2A;PDE2A	NM_001143839;NR_026572;NM_001146209;NM_002599
2713	cg06035754	-0.0168795	0.0233344	chr11	ARFGAP2	NM_032389
2729	cg06072036	0.0163455	0.0464434	chr11	PNPLA2	NM_020376
2731	cg06076931	0.0813274	0.0203696	chr11	GLB1L2	NM_138342
2734	cg06102777	0.0298648	0.00858623	chr11	PLA2G16;PLA2G16	NM_007069;NM_001128203
2749	cg06142621	-0.0187336	0.0184212	chr11	HEPACAM;HEPACAM	NM_152722;NM_152722
2783	cg06202053	0.0409872	0.0315987	chr11	CCDC88B	NM_032251
2802	cg06245037	0.0234273	0.0232995	chr11	ALX4	NM_021926
2808	cg06266097	0.0284479	0.0363877	chr11	MDK;DGKZ;DGKZ;DGKZ;DGKZ	NM_001012334;NM_003646;NM_201533;NM_001105540;NM_201532
2882	cg06483559	-0.016512	0.0364393	chr11	OR6X1	NM_001005188
2901	cg06526620	0.0435628	0.0215428	chr11	FUT4	NM_002033
2912	cg06552368	-0.0277042	0.0314731	chr11	DPAGT1	NM_001382
2920	cg06567290	0.0923952	0.0171815	chr11	SLC37A4;SLC37A4;SLC37A4;SLC37A4;SLC37A4;SLC37A4	NM_001164277;NM_001164280;NM_001164278;NM_001164280;NM_001467;NM_001164279
2957	cg06645952	0.0391903	0.0154087	chr11
2958	cg06648455	-0.0235275	0.0334258	chr11	ANO1;ANO1	NM_018043;NR_030691
2985	cg06705925	0.0143644	0.0217284	chr11	B3GAT1;B3GAT1	NM_018644;NM_054025
3013	cg06762969	0.0880911	0.0435714	chr11	C11orf54;TAF1D	NM_014039;NM_024116
3015	cg06767612	-0.0225513	0.0400816	chr11	ARHGEF12	NM_015313
3026	cg06779856	-0.0353861	0.0305541	chr11
3033	cg06796220	-0.0168859	0.0426485	chr11	MICAL2	NM_014632
3035	cg06798934	-0.0116446	0.0364829	chr11
3038	cg06806711	-0.038209	0.0418237	chr11	MS4A1;MS4A1;MS4A1;MS4A1	NM_152866;NM_021950;NM_021950;NM_152866
3141	cg07047815	-0.0270025	0.0303696	chr11	LSP1;LSP1;LSP1;LSP1	NM_001013254;NM_002339;NM_001013253;NM_001013255
3161	cg07083101	-0.0776365	0.0285921	chr11
3186	cg07127259	-0.0125355	0.0200722	chr11	KCNQ1	NM_000218
3192	cg07131742	-0.0563156	0.0274487	chr11	B3GNT1;BRMS1;BRMS1	NM_006876;NM_001024957;NM_015399
3198	cg07136133	-0.0802403	0.0390835	chr11	PRR5L;PRR5L;PRR5L;PRR5L	NM_024841;NM_001160167;NM_001160169;NM_001160168
3232	cg07231005	0.0152175	0.0417195	chr11
3237	cg07243138	-0.0316558	0.0115123	chr11
3258	cg07295904	-0.0206626	0.00968252	chr11	MUC5B	NM_002458
3343	cg07489132	0.0169757	0.0332138	chr11
3350	cg07498426	-0.0124277	0.026716	chr11
3359	cg07535628	0.0403043	0.0230016	chr11	EFCAB4A	NM_173584
3367	cg07555182	-0.0243057	0.0387752	chr11	RAB30	NM_014488
3381	cg07573279	0.0402435	0.0367735	chr11	LOC645332	NR_024249
3396	cg07605836	0.0245858	0.0272224	chr11	YIF1A	NM_020470
3398	cg07611000	0.0267963	0.0172136	chr11	EHBP1L1	NM_001099409
3399	cg07613278	0.0247688	0.0483465	chr11	API5;API5;API5;API5	NR_024625;NM_001142931;NM_001142930;NM_006595
3400	cg07616094	-0.0199777	0.00827796	chr11	MIR670	NR_031577
3424	cg07680167	0.041823	0.0227892	chr11
3466	cg07768201	0.0200043	0.0343833	chr11	CAT	NM_001752
3490	cg07804888	-0.0108212	0.0245309	chr11	OR8U8;OR5R1	NM_001013356;NM_001004744
3569	cg08012287	0.0804675	0.0223626	chr11	ACTN3	NM_001104
3594	cg08066376	-0.0414107	0.0138528	chr11	MRPL16	NM_017840
3601	cg08083088	-0.0148089	0.0484579	chr11	SLC37A4;SLC37A4;SLC37A4;SLC37A4;SLC37A4	NM_001164277;NM_001164280;NM_001164278;NM_001467;NM_001164279
3642	cg08182160	0.0236778	0.0145251	chr11	PDE2A;PDE2A	NM_002599;NM_002599
3651	cg08202769	0.0140034	0.0218694	chr11	FAM89B;FAM89B;FAM89B;SSSCA1	NM_152832;NM_001098785;NM_001098784;NM_006396
3678	cg08265418	-0.0236543	0.0165604	chr11	THYN1;THYN1;ACAD8;THYN1;THYN1;THYN1	NM_199298;NM_199297;NM_014384;NM_014174;NM_001037304;NM_001037305
3689	cg08288223	-0.0691881	0.0263759	chr11	SHANK2	NM_012309
3694	cg08294986	0.0163778	0.00780001	chr11	USP2;USP2	NM_004205;NM_171997
3696	cg08304103	-0.0222363	0.00636452	chr11	FZD4	NM_012193
3701	cg08317133	-0.0131221	0.0199028	chr11	MACROD1;FLRT1	NM_014067;NM_013280
3709	cg08331163	-0.0196309	0.0367113	chr11	OR4D11	NM_001004706
3714	cg08351017	-0.0145761	0.0197055	chr11	TALDO1	NM_006755
3747	cg08437786	-0.0519669	0.0362685	chr11	IFITM5	NM_001025295
3805	cg08608126	-0.035005	0.0113739	chr11	CD59;CD59;CD59;CD59;CD59;CD59;CD59;CD59	NM_203330;NM_001127225;NM_001127227;NM_203329;NM_001127226;NM_000611;NM_001127223;NM_203331
3812	cg08623810	-0.0176274	0.0305541	chr11	NRXN2;NRXN2	NM_138732;NM_015080
3814	cg08630923	0.0587013	0.04022	chr11
3830	cg08687753	-0.0403579	0.0331957	chr11	NOX4	NM_001143837
3838	cg08700546	-0.0107148	0.0405718	chr11	SLC39A13;SLC39A13	NM_152264;NM_001128225
3846	cg08716456	0.0188725	0.026024	chr11	HSPA8;HSPA8	NM_153201;NM_006597
3853	cg08757628	-0.0126729	0.0367735	chr11	TMEM41B;TMEM41B;TMEM41B	NM_001165030;NM_015012;NR_028491
3872	cg08792584	-0.0409365	0.025229	chr11
3873	cg08794954	0.08036	0.046729	chr11	ODZ4	NM_001098816
3885	cg08821874	-0.0139153	0.0195407	chr11	HCCA2	NM_053005
3886	cg08824847	-0.0496033	0.0131921	chr11
3893	cg08861127	0.0589242	0.0368375	chr11	CD82;CD82	NM_001024844;NM_002231
3919	cg08931107	0.0394988	0.0370213	chr11	RIN1	NM_004292
3927	cg08951891	-0.0112408	0.0415703	chr11	CABP4	NM_145200
3968	cg09080444	-0.0066972	0.0224786	chr11	FOLR1;FOLR1;FOLR1;FOLR1	NM_016724;NM_016725;NM_000802;NM_016729
3974	cg09088050	-0.0384549	0.00762636	chr11	TUB	NM_003320
3978	cg09096950	0.0815264	0.0478954	chr11	UBE4A	NM_004788
3989	cg09129050	0.0799583	0.0297665	chr11	NRXN2;NRXN2	NM_138732;NM_015080
3998	cg09145322	-0.0135261	0.0334258	chr11	UNC93B1	NM_030930
4002	cg09156610	0.0346931	0.0280532	chr11	ALKBH8	NM_138775
4006	cg09176545	0.0339091	0.034894	chr11
4010	cg09183450	-0.0314966	0.0217284	chr11	AHNAK;AHNAK	NM_024060;NM_001620
4017	cg09203240	-0.028605	0.0210016	chr11	LRP5	NM_002335
4031	cg09255694	-0.0251388	0.0284455	chr11	RRM1;RRM1	NM_001033;NM_001033
4076	cg09376935	-0.00571696	0.0290519	chr11	IGHMBP2	NM_002180
4098	cg09452922	-0.0432981	0.0154087	chr11	DLG2	NM_001142699
4101	cg09471455	-0.040797	0.0233492	chr11	TBC1D10C	NM_198517
4142	cg09612912	-0.0110032	0.0376665	chr11	RICS	NM_001142685
4147	cg09615874	-0.0325825	0.0118201	chr11	MMP3	NM_002422
4149	cg09618974	-0.0118058	0.0253862	chr11	TRIM22	NM_006074
4200	cg09774310	-0.00706882	0.0448117	chr11
4204	cg09779044	-0.0123675	0.0377069	chr11	CKAP5;CKAP5	NM_014756;NM_001008938
4231	cg09854615	0.0414376	0.00953676	chr11
4243	cg09884480	0.0225861	0.0361736	chr11	MRPL23	NM_021134
4246	cg09888840	0.0714028	0.0224503	chr11	SLC43A1	NM_003627
4261	cg09936933	-0.0266935	0.0169016	chr11	STARD10	NM_006645
4289	cg10003766	-0.0209565	0.0446348	chr11	DEAF1	NM_021008
4293	cg10010533	0.0498374	0.0199343	chr11	FAM181B	NM_175885
4345	cg10130088	-0.0239502	0.0155234	chr11
4346	cg10132543	-0.0122171	0.016233	chr11	CPT1A;CPT1A	NM_001031847;NM_001876
4351	cg10148841	-0.038266	0.0265511	chr11	ROBO4	NM_019055
4355	cg10160630	-0.0188575	0.0099781	chr11	ARL2	NM_001667
4356	cg10161008	0.0344716	0.0220883	chr11	MACROD1	NM_014067
4423	cg10321156	0.0665379	0.0467345	chr11
4429	cg10342490	0.0141778	0.0369394	chr11	GUCY1A2	NM_000855
4431	cg10359006	-0.0459744	0.0181309	chr11	ARRB1;ARRB1	NM_020251;NM_004041
4433	cg10371523	-0.0206462	0.0157451	chr11	SHANK2;SHANK2	NM_012309;NM_133266
4444	cg10405729	-0.00709389	0.0335262	chr11	GLYAT;GLYAT	NM_201648;NM_005838
4474	cg10462961	-0.0451804	0.0129469	chr11
4489	cg10498429	-0.0172174	0.0477851	chr11	GPR137;BAD;BAD;GPR137	NM_001170881;NM_004322;NM_032989;NM_001170726
4510	cg10534923	-0.0165984	0.0127047	chr11	TM7SF2;TM7SF2	NM_003273;NM_003273
4516	cg10550693	-0.0177466	0.0305541	chr11	SYVN1;SYVN1	NM_032431;NM_172230
4530	cg10590925	0.0827648	0.0316274	chr11	BRSK2	NM_003957
4532	cg10598066	0.00912423	0.0448983	chr11	ACCS;ACCS;ACCS	NM_001127219;NM_001127219;NM_032592
4558	cg10679277	0.0282184	0.0301996	chr11	ETS1;ETS1;ETS1	NM_001143820;NM_001162422;NM_005238
4561	cg10680051	0.0134487	0.0160528	chr11	ROBO3	NM_022370
4568	cg10701232	-0.022138	0.0344439	chr11	RASGRP2;RASGRP2;RASGRP2	NM_153819;NM_001098671;NM_001098670
4600	cg10827488	0.0155761	0.0305389	chr11	ZBTB16;ZBTB16	NM_006006;NM_001018011
4605	cg10835651	-0.01042	0.0334258	chr11	ABTB2	NM_145804
4615	cg10860647	-0.0365985	0.0356969	chr11
4626	cg10889792	-0.00879362	0.0395702	chr11	KRTAP5-9	NM_005553
4627	cg10891482	-0.0615266	0.0123369	chr11	MS4A8B;MS4A8B	NM_031457;NM_031457
4633	cg10905180	-0.0886901	0.0241898	chr11	OR51E2	NM_030774
4634	cg10906530	0.0181661	0.0198384	chr11	LOC645332	NR_024249
4681	cg11038774	-0.0124607	0.0444737	chr11
4696	cg11077392	-0.0191168	0.0360718	chr11	NAV2	NM_001111018
4700	cg11096993	-0.0745738	0.0236024	chr11	ACY3	NM_080658
4707	cg11129341	-0.0241838	0.0246042	chr11	NAV2;NAV2;NAV2	NM_182964;NM_001111018;NM_145117
4730	cg11190277	-0.0240783	0.0399448	chr11	CCND1	NM_053056
4759	cg11279857	-0.0407024	0.0467847	chr11	FKBP2;FKBP2;FKBP2	NM_004470;NM_057092;NM_001135208
4763	cg11287851	-0.018925	0.0156787	chr11	MCAM	NM_006500
4829	cg11436362	-0.057096	0.0389632	chr11	ADRBK1	NM_001619
4848	cg11473001	-0.0182916	0.0439608	chr11	NTM;NTM;NTM;NTM	NM_016522;NM_001144059;NM_001144058;NM_001048209
4870	cg11524260	-0.0145045	0.019246	chr11	LOC645332	NR_024249
4873	cg11537479	-0.00751529	0.0379482	chr11	PRCP;PRCP	NM_199418;NM_005040
4901	cg11611244	-0.0238898	0.0463356	chr11	HCCA2	NM_053005
4909	cg11623855	-0.0381612	0.0398786	chr11	C11orf41	NM_012194
4936	cg11667086	0.0100902	0.0320327	chr11
4939	cg11675225	-0.0110773	0.0412071	chr11	LSP1;LSP1	NM_001013253;NM_002339
4953	cg11701250	-0.0109556	0.048793	chr11	MRE11A;MRE11A;ANKRD49;ANKRD49	NM_005591;NM_005590;NM_017704;NM_017704
4954	cg11701604	-0.00965428	0.0265284	chr11	LDLRAD3	NM_174902
4971	cg11731626	-0.0155056	0.0107559	chr11	TCIRG1	NM_006019
4981	cg11758697	-0.0369942	0.0267407	chr11
5012	cg11831238	0.0144776	0.0384861	chr11	DBX1	NM_001029865
5017	cg11838997	-0.0262959	0.0263238	chr11	NRGN;NRGN	NM_006176;NM_001126181
5025	cg11856976	-0.0357293	0.0341324	chr11	SYT13	NM_020826
5029	cg11861562	0.0659886	0.0279938	chr11	TAGLN;TAGLN	NM_003186;NM_001001522
5080	cg11989011	-0.0161543	0.0198162	chr11	SLC37A2;SLC37A2	NM_198277;NM_001145290
5084	cg12005186	-0.0148424	0.0476593	chr11	FERMT3;FERMT3	NM_031471;NM_178443
5101	cg12038298	-0.0379887	0.0295303	chr11	TNNT3;TNNT3;TNNT3;TNNT3	NM_001042781;NM_006757;NM_001042780;NM_001042782
5116	cg12070987	0.0209635	0.025896	chr11	NDUFS8	NM_002496
5130	cg12106634	0.0454239	0.0156787	chr11	ATM;NPAT	NM_000051;NM_002519
5142	cg12159215	-0.0230326	0.0411217	chr11	UPK2	NM_006760
5157	cg12219390	-0.0159568	0.0394589	chr11	INS-IGF2;INS-IGF2	NR_003512;NM_001042376
5185	cg12319507	0.0140387	0.0173902	chr11	FGF3	NM_005247
5212	cg12405136	0.04888	0.00858623	chr11	MRGPRF;MRGPRF	NM_001098515;NM_145015
5219	cg12423493	0.0407405	0.0471684	chr11	FKBP2;FKBP2	NM_004470;NM_001135208
5240	cg12483813	-0.0180879	0.0376702	chr11	FCHSD2	NM_014824
5243	cg12491115	0.0905061	0.00748455	chr11	APLP2;APLP2;APLP2;APLP2;APLP2;APLP2	NR_024516;NR_024515;NM_001142276;NM_001642;NM_001142277;NM_001142278
5246	cg12496355	0.0548665	0.016692	chr11	KIRREL3;KIRREL3	NM_032531;NM_001161707
5276	cg12575751	-0.0238338	0.0219994	chr11	NUCB2	NM_005013
5285	cg12598870	-0.0526204	0.0356529	chr11	NELL1;NELL1	NM_006157;NM_201551
5319	cg12711760	-0.0593554	0.0405075	chr11	NAV2;NAV2;NAV2;NAV2	NM_182964;NM_001111018;NM_145117;NM_001111019
5325	cg12729518	0.0291597	0.0204576	chr11	MRGPRD	NM_198923
5350	cg12833018	-0.0439283	0.0122493	chr11	SCGB2A2	NM_002411
5374	cg12904004	0.0453671	0.0435202	chr11	CALCA;CALCA;CALCA	NM_001741;NM_001033953;NM_001033952
5405	cg12986628	-0.0273008	0.0365169	chr11	RNF26	NM_032015
5412	cg13010014	0.0906309	0.0125985	chr11	ROBO3	NM_022370
5416	cg13012691	0.0157878	0.00999159	chr11	AP2A2	NM_012305
5421	cg13039082	-0.0442149	0.0439933	chr11	PAK1;PAK1	NM_002576;NM_001128620
5429	cg13063369	0.0215388	0.0331104	chr11
5459	cg13167664	-0.0268374	0.0188519	chr11	INS-IGF2;IGF2;IGF2;IGF2	NR_003512;NM_001127598;NM_000612;NM_001007139
5481	cg13213604	0.0108928	0.0407709	chr11	ILK;ILK;RRP8;ILK	NM_001014794;NM_004517;NM_015324;NM_001014795
5485	cg13228421	-0.0154966	0.0236845	chr11	MUC2;MUC2	NM_002457;NM_002457
5501	cg13279956	-0.0127662	0.0448117	chr11	SPRYD5	NM_032681
5502	cg13280803	-0.0204185	0.041394	chr11	FSHB;FSHB	NM_001018080;NM_000510
5506	cg13289202	0.0675084	0.0302357	chr11	ABTB2	NM_145804
5512	cg13300301	0.0671646	0.0151396	chr11	FUT4;FUT4	NM_002033;NM_002033
5517	cg13311939	-0.0212238	0.0408019	chr11
5521	cg13319938	-0.0342461	0.006935	chr11	TRPM5	NM_014555
5528	cg13332953	-0.036383	0.00495159	chr11	DKK3;DKK3;DKK3	NM_001018057;NM_015881;NM_013253
5555	cg13411336	0.0925997	0.0306135	chr11
5565	cg13428066	-0.0629011	0.0323294	chr11	KCNQ1;KCNQ1OT1;KCNQ1	NM_000218;NR_002728;NM_181798
5575	cg13457890	-0.0273242	0.0350961	chr11	LRDD;LRDD;LRDD	NM_018494;NM_145887;NM_145886
5579	cg13473383	-0.0133054	0.0423434	chr11	ZDHHC5	NM_015457
5589	cg13491234	0.0431146	0.0212703	chr11	CALCA;CALCA;CALCA	NM_001741;NM_001033953;NM_001033952
5618	cg13563074	-0.0645159	0.0232747	chr11	OVCH2	NM_198185
5650	cg13633560	0.0988542	0.00968252	chr11	LRRC32;LRRC32;LRRC32	NM_001128922;NM_005512;NM_005512
5671	cg13671930	-0.0208775	0.0341218	chr11	SLC22A18AS;SLC22A18;SLC22A18	NM_007105;NM_183233;NM_002555
5690	cg13694680	-0.0261422	0.0301023	chr11	FIBIN	NM_203371
5716	cg13755776	-0.0354268	0.0485891	chr11
5740	cg13806267	-0.0387338	0.0263238	chr11
5790	cg13942016	-0.00984133	0.0477535	chr11	PSMC3	NM_002804
5798	cg13965202	-0.0160439	0.0351911	chr11
5801	cg13972394	-0.024071	0.0245674	chr11	RTN3;RTN3;RTN3;RTN3;RTN3;RTN3;RTN3;RTN3	NM_201430;NM_006054;NM_201428;NM_201429;NM_006054;NM_201430;NM_201429;NM_201428
5803	cg13974632	0.0364932	0.0121989	chr11	BDNF;BDNF;BDNF;BDNF;BDNF	NM_170731;NM_170732;NM_001143806;NM_001143807;NM_001143805
5808	cg13982695	-0.00876711	0.0323772	chr11	TUB	NM_003320
5809	cg13984434	-0.0155805	0.0470362	chr11
5863	cg14116162	-0.0210404	0.0391447	chr11	BAD;GPR137;GPR137;BAD;GPR137;GPR137	NM_032989;NM_020155;NM_001170726;NM_004322;NM_001170880;NM_001170881
5875	cg14144513	-0.017961	0.0304779	chr11
5879	cg14152222	0.0123064	0.0331104	chr11	MRGPRF;MRGPRF;MRGPRF;MRGPRF	NM_001098515;NM_145015;NM_001098515;NM_145015
5910	cg14215748	0.0345883	0.0292442	chr11	COPB1;COPB1;COPB1	NM_016451;NM_001144061;NM_001144062
5925	cg14256396	-0.0300818	0.00997457	chr11
5948	cg14305262	-0.00710142	0.049947	chr11	PHRF1	NM_020901
5955	cg14309111	0.034819	0.04498	chr11	ODZ4	NM_001098816
5959	cg14319451	0.124243	0.035637	chr11	RCOR2	NM_173587
5969	cg14348532	0.0358442	0.0295303	chr11	CALCA;CALCA;CALCA	NM_001033953;NM_001033952;NM_001741
5982	cg14378925	-0.0283638	0.0280274	chr11	EHD1	NM_006795
6014	cg14468692	0.141222	0.00402251	chr11	RNH1;RNH1;RNH1;RNH1;RNH1;RNH1;RNH1;RNH1	NM_203384;NM_203385;NM_203387;NM_203388;NM_203383;NM_203389;NM_002939;NM_203386
6022	cg14487944	-0.0268695	0.0499648	chr11
6067	cg14576565	0.0300066	0.0390835	chr11	KCNK4	NM_033310
6083	cg14598198	0.0175623	0.0315676	chr11	CDKN1C;CDKN1C;CDKN1C	NM_000076;NM_001122630;NM_001122631
6094	cg14632030	-0.0199927	0.0248387	chr11	MS4A7;MS4A7;MS4A7;MS4A7	NM_206939;NM_206938;NM_206940;NM_021201
6095	cg14632899	-0.0107314	0.0342191	chr11	CHRM1	NM_000738
6126	cg14698297	-0.0200721	0.0364984	chr11	C11orf80	NM_024650
6152	cg14774438	0.0272401	0.0214734	chr11	SDHD;TIMM8B;TIMM8B	NM_003002;NM_012459;NR_028383
6158	cg14797402	0.0203129	0.0162764	chr11
6162	cg14813083	0.113543	0.0141191	chr11	LDHAL6A;LDHAL6A	NM_144972;NM_001144071
6173	cg14841965	-0.00722691	0.0482602	chr11	OR6T1	NM_001005187
6185	cg14872693	-0.0093649	0.0234017	chr11	NEAT1	NR_028272
6194	cg14892359	-0.0151367	0.0388841	chr11
6216	cg14955976	-0.062749	0.0382361	chr11
6263	cg15115797	-0.0191041	0.017615	chr11	MRPL11;MRPL11;MRPL11	NM_170738;NM_016050;NM_170739
6278	cg15159060	-0.0473764	0.0492617	chr11	FSHB;FSHB	NM_000510;NM_001018080
6280	cg15164881	-0.0177821	0.00760999	chr11	TSPAN4;TSPAN4;TSPAN4;TSPAN4;TSPAN4;TSPAN4;TSPAN4	NM_001025239;NM_001025237;NM_001025234;NM_001025235;NM_001025236;NM_001025238;NM_003271
6283	cg15168906	0.0327917	0.0341031	chr11	IGF2AS;INS-IGF2;IGF2;IGF2;IGF2AS	NR_028044;NR_003512;NM_001007139;NM_001127598;NR_028043
6303	cg15225105	-0.010419	0.0471211	chr11	SAC3D1	NM_013299
6329	cg15270353	-0.0525981	0.0417508	chr11
6340	cg15307777	0.0238898	0.0458909	chr11
6346	cg15320925	0.0129636	0.0483465	chr11	BET1L;BET1L;RIC8A	NM_016526;NM_001098787;NM_021932
6349	cg15334391	-0.0222577	0.0391709	chr11	KIRREL3;KIRREL3	NM_001161707;NM_032531
6366	cg15382933	0.0691398	0.0489934	chr11	CD59;CD59;CD59;CD59;CD59;CD59;CD59;CD59	NM_203330;NM_001127225;NM_203329;NM_001127226;NM_000611;NM_001127223;NM_001127227;NM_203331
6370	cg15391359	-0.0179781	0.023536	chr11
6380	cg15418499	-0.0503996	0.0328445	chr11	IL18	NM_001562
6385	cg15436385	-0.0243511	0.0483254	chr11
6417	cg15534755	0.0773156	0.0466021	chr11	TAGLN;TAGLN	NM_003186;NM_001001522
6451	cg15618210	-0.0228335	0.0187683	chr11	OPCML	NM_001012393
6457	cg15638292	0.0403808	0.0444231	chr11	MYO7A;MYO7A;MYO7A	NM_000260;NM_001127180;NM_001127179
6460	cg15651149	-0.0249059	0.0477535	chr11
6473	cg15694989	0.0242416	0.00712364	chr11	FOSL1	NM_005438
6481	cg15705971	-0.0245014	0.019195	chr11	FAT3	NM_001008781
6488	cg15723709	0.00966991	0.0323783	chr11
6495	cg15739881	-0.012481	0.0466109	chr11	SLC22A18AS;SLC22A18;SLC22A18	NM_007105;NM_183233;NM_002555
6501	cg15756407	-0.0427194	0.0488598	chr11	TIMM8B;SDHD;TIMM8B	NM_012459;NM_003002;NR_028383
6530	cg15839394	0.00974093	0.0387555	chr11	NAP1L4	NM_005969
6556	cg15896978	-0.0129378	0.0360866	chr11	APOA1	NM_000039
6567	cg15945333	0.0876427	0.0231001	chr11	SPI1;SPI1	NM_003120;NM_001080547
6569	cg15948836	-0.0693458	0.0396908	chr11	LDLRAD3	NM_174902
6597	cg16028555	-0.0187198	0.0308995	chr11
6603	cg16046376	-0.0286374	0.00748455	chr11	PC;PC	NM_000920;NM_001040716
6605	cg16049246	0.0322572	0.0405075	chr11
6652	cg16163826	0.0709913	0.0201125	chr11
6703	cg16276224	-0.00584275	0.0289646	chr11	TRPC2	NR_002720
6705	cg16279835	0.0699934	0.0291255	chr11	ATG2A	NM_015104
6712	cg16309325	-0.0229683	0.02045	chr11	LMO1	NM_002315
6717	cg16317318	-0.019487	0.0311355	chr11	CDC42EP2	NM_006779
6724	cg16331890	0.0184138	0.0242927	chr11	C11orf54;TAF1D;TAF1D	NM_014039;NM_024116;NM_024116
6752	cg16416793	0.0193824	0.037004	chr11	YAP1;YAP1	NM_001130145;NM_006106
6772	cg16459103	0.0253815	0.0436236	chr11	KLHL35	NM_001039548
6773	cg16459890	-0.0169694	0.0293093	chr11	CASP1;CARD16;CASP1;CASP1;CASP1;CASP1;CARD16	NM_001223;NM_001017534;NM_033292;NM_033294;NM_033293;NM_033295;NM_052889
6800	cg16523148	0.0370269	0.0365169	chr11	SYVN1;SYVN1	NM_032431;NM_172230
6802	cg16524733	0.121045	0.0197222	chr11	TAGLN;TAGLN;TAGLN;TAGLN	NM_001001522;NM_003186;NM_003186;NM_001001522
6820	cg16568681	-0.0799209	0.0225296	chr11	CD59;CD59;CD59;CD59	NM_000611;NM_203330;NM_203329;NM_203331
6845	cg16612806	-0.0289818	0.0381488	chr11
6847	cg16614500	0.0600491	0.0322214	chr11	TMEM80;DEAF1;TMEM80	NM_001042463;NM_021008;NM_174940
6860	cg16638248	-0.0255617	0.0356969	chr11	MRVI1;MRVI1;MRVI1;MRVI1	NM_130385;NM_001098579;NM_001100167;NM_001100163
6862	cg16651314	-0.0344685	0.0286109	chr11
6888	cg16730369	0.0129023	0.0436761	chr11	GRIK4	NM_014619
6902	cg16763654	-0.0308105	0.0421382	chr11	C11orf9	NM_001127392
6903	cg16769152	0.0348533	0.0436237	chr11	KCTD14	NM_023930
6906	cg16776065	0.035891	0.0249306	chr11	PRKCDBP	NM_145040
6913	cg16806210	-0.0143368	0.0189427	chr11	TTC36	NM_001080441
6958	cg16977872	-0.01652	0.0250874	chr11	FKBP2;FKBP2;FKBP2	NM_057092;NM_004470;NM_001135208
6963	cg17007896	0.0430041	0.0268909	chr11
6966	cg17013303	-0.0158055	0.0490869	chr11	OR5B2	NM_001005566
7029	cg17213552	-0.012735	0.0331018	chr11	DLAT;DLAT	NM_001931;NM_001931
7095	cg17434901	-0.0238653	0.0343396	chr11
7105	cg17464820	-0.0321802	0.0399497	chr11	SIK3	NM_025164
7121	cg17490921	-0.0132426	0.0338887	chr11	ZNF259	NM_003904
7132	cg17510957	0.039528	0.027424	chr11	SORL1	NM_003105
7164	cg17610169	0.0672924	0.0169361	chr11
7177	cg17651317	0.00896681	0.0235604	chr11	LRP5	NM_002335
7188	cg17695841	0.0515877	0.0450543	chr11	SLC35C1;SLC35C1;SLC35C1	NM_001145266;NM_018389;NM_001145265
7195	cg17709804	0.0185018	0.0466388	chr11
7235	cg17838516	-0.053846	0.0181736	chr11	MTNR1B	NM_005959
7295	cg18009574	-0.0152772	0.0459953	chr11	NAV2;NAV2;NAV2	NM_182964;NM_001111018;NM_145117
7298	cg18013356	0.0768631	0.0404458	chr11	MAP4K2	NM_004579
7299	cg18014109	-0.0155777	0.0210555	chr11
7337	cg18112681	-0.0544127	0.0464606	chr11	RARRES3	NM_004585
7387	cg18268363	0.0235565	0.0288137	chr11	MRGPRD	NM_198923
7400	cg18315125	-0.019322	0.0455535	chr11
7413	cg18369257	-0.0248475	0.0401104	chr11	C11orf9	NM_001127392
7424	cg18395636	0.0523834	0.0369575	chr11	RAB38	NM_022337
7432	cg18409302	-0.0101591	0.0310429	chr11	CD81	NM_004356
7444	cg18437209	0.0370555	0.0161873	chr11
7454	cg18457737	-0.015624	0.0129821	chr11	SPATA19	NM_174927
7472	cg18512232	-0.0114863	0.0208685	chr11
7537	cg18698884	0.0207778	0.0241974	chr11
7561	cg18776876	-0.0162516	0.0397827	chr11	TBC1D10C	NM_198517
7568	cg18791121	0.0116935	0.028978	chr11	CYB5R2;CYB5R2	NM_016229;NM_016229
7570	cg18793661	-0.0181367	0.0179061	chr11	SCGB1C1;LOC653486	NM_145651;NM_001097610
7573	cg18801955	-0.0234565	0.0447652	chr11
7584	cg18838431	0.0232264	0.0440082	chr11	KCNE3	NM_005472
7603	cg18886347	-0.052021	0.0266602	chr11	OR9Q1	NM_001005212
7617	cg18949786	0.028238	0.0318114	chr11	NXF1;NXF1;TMEM223	NM_001081491;NM_006362;NM_001080501
7631	cg18987410	0.0226171	0.0380641	chr11	HEPACAM	NM_152722
7636	cg19002337	-0.0154401	0.0255543	chr11	INS-IGF2;IGF2AS;IGF2;IGF2;IGF2AS;IGF2	NR_003512;NR_028044;NM_001127598;NM_001007139;NR_028043;NM_000612
7646	cg19023300	0.0113081	0.0488014	chr11	FOLH1B	NM_153696
7659	cg19070899	-0.0115842	0.0411217	chr11	FAM160A2;FAM160A2	NM_032127;NM_001098794
7693	cg19192256	0.0955973	0.0327224	chr11	GPR44	NM_004778
7697	cg19210276	0.133773	0.043986	chr11	CTNND1;CTNND1;CTNND1;CTNND1;CTNND1;CTNND1;CTNND1;CTNND1;CTNND1;CTNND1;CTNND1;CTNND1;CTNND1;CTNND1;CTNND1;CTNND1;CTNND1;CTNND1;CTNND1;CTNND1;CTNND1;CTNND1;CTNND1;CTNND1;CTNND1;CTNND1	NM_001085459;NM_001085462;NM_001085462;NM_001085463;NM_001085458;NM_001085461;NM_001085464;NM_001085467;NM_001085460;NM_001085469;NM_001085468;NM_001085465;NM_001085465;NM_001085468;NM_001085460;NM_001085466;NM_001085459;NM_001331;NM_001085467;NM_001331;NM_001085463;NM_001085464;NM_001085469;NM_001085458;NM_001085466;NM_001085461
7721	cg19304096	-0.0161341	0.0328918	chr11
7729	cg19350767	-0.0400919	0.0320177	chr11	OR9Q2	NM_001005283
7734	cg19372337	0.0103398	0.0259516	chr11	SPTY2D1	NM_194285
7738	cg19393605	-0.019773	0.0120058	chr11	ARL2	NM_001667
7762	cg19449594	-0.00657786	0.0436997	chr11
7779	cg19497444	0.107848	0.0215428	chr11	SLC22A18;SLC22A18	NM_183233;NM_002555
7800	cg19547124	-0.0141601	0.0378993	chr11	HCCA2	NM_053005
7803	cg19567594	0.0316895	0.0304201	chr11	MRVI1;MRVI1;MRVI1;MRVI1;MRVI1	NM_001100163;NM_001100163;NM_130385;NM_130385;NM_001100167
7807	cg19574327	-0.0396663	0.0205451	chr11
7817	cg19596755	-0.0245398	0.0240316	chr11	CPT1A;CPT1A	NM_001031847;NM_001876
7900	cg19821098	-0.0130982	0.0239596	chr11	DSCAML1	NM_020693
7951	cg19975933	0.0215624	0.0315878	chr11	P4HA3	NM_182904
7959	cg20006855	-0.0143487	0.0229019	chr11	NADSYN1	NM_018161
7965	cg20019985	0.0222904	0.0372599	chr11
7973	cg20051949	-0.015963	0.0235216	chr11	KIRREL3;KIRREL3	NM_001161707;NM_032531
7974	cg20052411	-0.00953377	0.0358023	chr11	RCE1;RCE1	NM_005133;NM_001032279
7975	cg20054027	-0.0191697	0.0230734	chr11	RCE1;C11orf80;RCE1	NM_001032279;NM_024650;NM_005133
8022	cg20173059	-0.0105416	0.0444231	chr11	TTC12;TTC12	NM_017868;NM_017868
8029	cg20210482	0.0194606	0.0228326	chr11
8038	cg20242427	0.0717024	0.0465234	chr11	DAK	NM_015533
8061	cg20288916	-0.01442	0.0417214	chr11
8108	cg20430631	0.0680776	0.0157586	chr11
8123	cg20480334	-0.00870271	0.0243132	chr11	ODZ4	NM_001098816
8131	cg20501958	-0.00584578	0.032598	chr11	SIRT3;SIRT3	NM_012239;NM_001017524
8140	cg20541779	0.00727739	0.0416867	chr11	CASP12	NR_000035
8153	cg20573919	-0.00998063	0.0431486	chr11	RPL27A	NM_000990
8157	cg20588618	0.0161492	0.0320177	chr11	PCNXL3;MAP3K11	NM_032223;NM_002419
8181	cg20666386	0.0192489	0.0478015	chr11	DGKZ;DGKZ	NM_201533;NM_201532
8196	cg20700549	-0.025533	0.00960877	chr11	TMEM109	NM_024092
8203	cg20725239	-0.0171509	0.0397827	chr11	HEPACAM;HEPACAM	NM_152722;NM_152722
8218	cg20761187	0.0744904	0.0146242	chr11	LOC100128239	NR_027276
8228	cg20784531	-0.0247993	0.0315515	chr11
8255	cg20856413	0.0139391	0.0495172	chr11	C11orf58;C11orf58;C11orf58;C11orf58	NM_001142705;NM_014267;NM_001142705;NM_014267
8278	cg20929545	0.0273603	0.0473314	chr11	HMBS;HMBS	NM_001024382;NM_000190
8300	cg20971459	-0.0217518	0.0421758	chr11	RTN3;RTN3;RTN3;RTN3	NM_006054;NM_201428;NM_201429;NM_201430
8306	cg20983112	0.0226879	0.0132855	chr11	DGAT2	NM_032564
8314	cg21002224	-0.0337864	0.0269691	chr11	SPTBN2	NM_006946
8331	cg21052766	-0.0568758	0.0387047	chr11	NAV2;NAV2;NAV2;NAV2	NM_182964;NM_001111018;NM_145117;NM_001111019
8333	cg21062347	0.108888	0.01045	chr11	SLC22A8	NM_004254
8335	cg21063716	-0.0206401	0.040326	chr11	ASCL2	NM_005170
8365	cg21150390	-0.055951	0.0432791	chr11	HCCA2;CTSD	NM_053005;NM_001909
8368	cg21160842	0.0705167	0.0173255	chr11	RCN1	NM_002901
8426	cg21373526	0.0334826	0.0121789	chr11	RAB30;RAB30	NM_014488;NM_014488
8477	cg21548340	0.0393466	0.00951689	chr11
8484	cg21565130	0.0254772	0.0435008	chr11	FEZ1;FEZ1	NM_005103;NM_022549
8488	cg21573692	-0.0187182	0.0433857	chr11	SRPR;FOXRED1	NM_003139;NM_017547
8494	cg21592954	0.0424443	0.0295954	chr11	KIRREL3;KIRREL3	NM_001161707;NM_032531
8534	cg21690489	-0.0255668	0.0422948	chr11	CREB3L1	NM_052854
8541	cg21702188	0.0553533	0.0368944	chr11	STX5;NXF1;NXF1	NM_003164;NM_006362;NM_001081491
8542	cg21704109	0.072431	0.0373004	chr11	ALX4	NM_021926
8548	cg21732056	-0.0105115	0.0473548	chr11	OR5P2	NM_153444
8557	cg21752517	0.0438669	0.0278452	chr11
8571	cg21809711	-0.0218726	0.0316505	chr11	FKBP2;FKBP2;FKBP2	NM_004470;NM_057092;NM_001135208
8573	cg21815083	-0.015037	0.025733	chr11	CCND1	NM_053056
8592	cg21881253	-0.0304755	0.0351408	chr11	MIR34B;BTG4;MIR34C	NR_029839;NM_017589;NR_029840
8623	cg21946524	-0.0133556	0.042451	chr11
8628	cg21971799	0.0526378	0.0378095	chr11
8629	cg21978924	0.0178571	0.0304678	chr11	ALX4	NM_021926
8631	cg21988813	0.126015	0.0227695	chr11	BEST1;BEST1	NM_004183;NM_001139443
8643	cg22016995	-0.00718711	0.0269907	chr11	IRF7;IRF7;IRF7	NM_004031;NM_001572;NM_004029
8645	cg22017900	-0.0227099	0.0370213	chr11
8657	cg22051865	-0.0132485	0.0322504	chr11	ARHGEF17	NM_014786
8669	cg22080436	-0.0162414	0.029486	chr11
8671	cg22085702	0.0263138	0.025113	chr11	CALCA;CALCA;CALCA	NM_001741;NM_001033953;NM_001033952
8741	cg22358121	-0.028087	0.0235496	chr11	TRAPPC4	NM_016146
8742	cg22365167	-0.0267385	0.0152405	chr11	AHNAK;AHNAK	NM_024060;NM_001620
8745	cg22367077	-0.0147129	0.0268943	chr11	UBXN1;UBXN1	NM_015853;NM_015853
8747	cg22371972	-0.0141239	0.0294564	chr11	SLC17A6	NM_020346
8760	cg22417398	-0.029308	0.029688	chr11	SCYL1;SCYL1	NM_020680;NM_001048218
8857	cg22692362	-0.0235037	0.027079	chr11	LRRC4C	NM_020929
8877	cg22753417	-0.0424366	0.0261634	chr11	GPR137;GPR137;BAD;BAD	NM_001170726;NM_001170881;NM_004322;NM_032989
8909	cg22858288	0.0861306	0.0236891	chr11	SLC22A18;SLC22A18	NM_183233;NM_002555
8914	cg22878054	-0.0360477	0.0300025	chr11	CNTN5;CNTN5	NM_014361;NM_175566
8948	cg22986597	-0.083481	0.0305771	chr11	FAM89B;FAM89B;FAM89B	NM_001098784;NM_001098785;NM_152832
8951	cg22996783	-0.0127936	0.0246286	chr11
8952	cg22997252	-0.0179177	0.0441784	chr11	GALNTL4	NM_198516
8962	cg23031444	-0.0118605	0.015287	chr11
8993	cg23125492	0.0164903	0.0428177	chr11	PAX6;PAX6;PAX6	NM_001604;NM_001127612;NM_000280
8999	cg23135908	0.0922107	0.0170397	chr11
9008	cg23156348	0.0521788	0.0402235	chr11
9023	cg23193059	0.0675147	0.0476978	chr11
9024	cg23193831	-0.00952939	0.0208959	chr11
9068	cg23335134	-0.016097	0.0330845	chr11	SLC22A18AS	NM_007105
9074	cg23366166	0.0852402	0.036708	chr11	FEZ1;FEZ1	NM_022549;NM_005103
9075	cg23371208	-0.0225835	0.0291045	chr11	MIR130A	NR_029673
9095	cg23424158	-0.0284675	0.0350834	chr11	DLG2;DLG2;DLG2;DLG2	NM_001142702;NM_001142699;NM_001364;NM_001142700
9121	cg23484599	0.0982174	0.00669301	chr11	PAX6;PAX6;PAX6	NM_001127612;NM_000280;NM_001604
9131	cg23501051	0.099088	0.0435714	chr11	LOC100126784;NAV2;NAV2;NAV2	NR_015384;NM_182964;NM_001111018;NM_145117
9135	cg23523668	-0.0280987	0.016233	chr11
9138	cg23533513	0.0778196	0.0310505	chr11	MYO7A;MYO7A;MYO7A	NM_000260;NM_001127180;NM_001127179
9147	cg23553368	-0.0365881	0.029852	chr11
9159	cg23593537	0.0127517	0.0222578	chr11	PDE2A;PDE2A;PDE2A;PDE2A	NR_026572;NM_001146209;NM_002599;NM_001143839
9162	cg23596244	-0.0213569	0.024045	chr11
9166	cg23599973	-0.0368068	0.0210284	chr11
9192	cg23664926	0.0525439	0.0111267	chr11
9216	cg23712030	0.0247489	0.0398812	chr11	ENDOD1	NM_015036
9221	cg23756005	-0.017435	0.0258912	chr11	BTG4	NM_017589
9227	cg23774975	-0.0258991	0.0489645	chr11	RHOG	NM_001665
9229	cg23796481	0.0126862	0.0280409	chr11	BAD;GPR137;GPR137;BAD;GPR137;GPR137	NM_032989;NM_020155;NM_001170726;NM_004322;NM_001170880;NM_001170881
9244	cg23850899	0.0273286	0.0280654	chr11	LRRC4C;LRRC4C	NM_020929;NM_020929
9246	cg23851932	-0.0460053	0.0463234	chr11	EHD1	NM_006795
9256	cg23881278	0.0327816	0.0135369	chr11	DRD2;DRD2	NM_000795;NM_016574
9259	cg23895722	0.112757	0.0316497	chr11	C11orf45;KCNJ5	NM_145013;NM_000890
9263	cg23907108	0.0885293	0.0398359	chr11	NRXN2;NRXN2;NRXN2	NM_138734;NM_138732;NM_015080
9267	cg23919924	-0.0183979	0.0174462	chr11	OR10G8	NM_001004464
9270	cg23926688	0.0178252	0.041575	chr11	EHD1	NM_006795
9341	cg24137863	-0.00668577	0.0445562	chr11
9345	cg24150623	0.0521912	0.0183248	chr11	MIR125B1;LOC399959	NR_029671;NR_024430
9351	cg24160158	0.118888	0.0186708	chr11	NUP160	NM_015231
9366	cg24212047	-0.00901602	0.0298605	chr11	LOC399959	NR_024430
9406	cg24339897	-0.0277056	0.00954154	chr11
9407	cg24342283	-0.0346997	0.0239423	chr11	CXCR5	NM_001716
9431	cg24422316	0.0451486	0.0444623	chr11	VPS37C	NM_017966
9444	cg24445752	-0.0120191	0.00950294	chr11	CASP5;CASP5;CASP5;CASP5;CASP5;CASP5	NR_024239;NM_001136110;NM_001136112;NM_001136111;NM_001136109;NM_004347
9448	cg24458609	0.0368584	0.0294928	chr11	LRRC55	NM_001005210
9472	cg24520862	-0.0257707	0.010854	chr11
9535	cg24689245	-0.0192373	0.0255264	chr11	DGAT2	NM_032564
9543	cg24694480	0.0189059	0.0192438	chr11	SCN4B;SCN4B	NM_001142348;NM_174934
9561	cg24732062	-0.0143175	0.00858623	chr11
9562	cg24733126	0.0315642	0.0470362	chr11	SCUBE2;SCUBE2	NM_020974;NM_001170690
9594	cg24825210	-0.0335134	0.0210016	chr11	MS4A10	NM_206893
9632	cg24937681	-0.0170138	0.0420381	chr11	PPFIA1;PPFIA1	NM_003626;NM_177423
9659	cg25026627	-0.0138643	0.0149244	chr11	CLDN25	NM_001101389
9676	cg25069102	0.0480265	0.025229	chr11	BAD;BAD	NM_004322;NM_032989
9703	cg25144276	0.0356677	0.048829	chr11	EFCAB4A	NM_173584
9707	cg25157291	-0.00740117	0.0363661	chr11	SPDYC	NM_001008778
9738	cg25273707	-0.00651862	0.0470283	chr11
9739	cg25278669	-0.0200065	0.0357419	chr11	ZBTB3	NM_024784
9742	cg25288155	0.049194	0.0491097	chr11	PLEKHB1;PLEKHB1;PLEKHB1;PLEKHB1;PLEKHB1;PLEKHB1	NM_001130033;NM_021200;NM_021200;NM_001130035;NM_001130034;NM_001130033
9764	cg25360663	-0.0142616	0.0470283	chr11	RAB1B	NM_030981
9830	cg25530631	-0.0208179	0.035606	chr11	DDB1;DDB1;DAK	NM_001923;NM_001923;NM_015533
9854	cg25586361	0.046419	0.012185	chr11	WT1;WT1;WT1;WT1	NM_024425;NM_024426;NM_000378;NM_024424
9864	cg25608626	-0.0258697	0.0156075	chr11	DSCAML1	NM_020693
9872	cg25625514	-0.0664928	0.016692	chr11
9876	cg25638870	0.0479623	0.0381457	chr11	NOX4;NOX4;NOX4;NOX4	NM_001143837;NR_026571;NM_016931;NM_001143836
9921	cg25754035	-0.0308659	0.0305389	chr11
9927	cg25782847	0.0170133	0.041394	chr11	C11orf88;C11orf88	NM_207430;NM_001100388
9928	cg25783352	0.0162009	0.0277465	chr11	CALCA;CALCA;CALCA	NM_001033953;NM_001033952;NM_001741
9931	cg25790955	-0.00857478	0.0268645	chr11	FAM168A	NM_015159
9950	cg25836044	-0.00962893	0.0187857	chr11
9986	cg25967459	-0.0612658	0.00843991	chr11	OR9Q1	NM_001005212
9994	cg25995133	0.0233486	0.00827796	chr11	SIGIRR;SIGIRR;SIGIRR	NM_001135054;NM_021805;NM_001135053
10003	cg26013434	-0.0255795	0.0366284	chr11	P2RY2;P2RY2;P2RY2;P2RY2;P2RY2	NM_002564;NM_002564;NM_176072;NM_176071;NM_176072
10056	cg26165081	-0.0292769	0.0448983	chr11	PSMA1	NM_148976
10058	cg26167249	-0.0132146	0.043655	chr11
10082	cg26221423	-0.0249965	0.0492556	chr11
10135	cg26369594	-0.0301232	0.00762636	chr11	HCCA2	NM_053005
10153	cg26427070	0.0315278	0.0066687	chr11	TRAF6;TRAF6	NM_004620;NM_145803
10161	cg26459819	0.032824	0.0369394	chr11	C11orf93;C11orf92	NM_001136105;NM_207429
10165	cg26468891	-0.042014	0.0126339	chr11	PTPRJ;PTPRJ	NM_002843;NM_001098503
10217	cg26671281	-0.018568	0.0198112	chr11	KCNQ1;KCNQ1	NM_000218;NM_181798
10236	cg26731131	-0.0547151	0.0372655	chr11
10240	cg26740318	0.0452197	0.0333354	chr11	LDHAL6A;LDHAL6A	NM_001144071;NM_144972
10271	cg26819695	0.0193317	0.0282416	chr11	ASAM	NM_024769
10286	cg26868250	0.014497	0.0468313	chr11	PSMA1	NM_148976
10288	cg26871885	-0.0291517	0.0444858	chr11	RIC8A;BET1L;BET1L	NM_021932;NM_001098787;NM_016526
10295	cg26883171	-0.0114886	0.0337552	chr11
10303	cg26902557	0.0691481	0.0441801	chr11	DUSP8;HCCA2	NM_004420;NM_053005
10337	cg26981076	0.0279569	0.0469037	chr11	MS4A3;MS4A3;MS4A3;MS4A3;MS4A3;MS4A3	NM_001031809;NM_001031809;NM_006138;NM_006138;NM_001031666;NM_001031666
10346	cg27006547	-0.015087	0.0478613	chr11	WDR74	NM_018093
10349	cg27022558	0.0535728	0.0288203	chr11
10377	cg27115973	-0.0166538	0.0323294	chr11	KCNQ1;KCNQ1	NM_181798;NM_000218
10380	cg27121267	-0.0206705	0.0159876	chr11	ACRV1;ACRV1;ACRV1;ACRV1;ACRV1;CHEK1;ACRV1;ACRV1;ACRV1;ACRV1	NM_020111;NM_020108;NM_020115;NM_001612;NM_020113;NM_001114121;NM_020069;NM_020109;NM_020107;NM_020110
10381	cg27121870	-0.0150482	0.0385165	chr11	B3GAT1;B3GAT1	NM_018644;NM_054025
10441	cg27324797	-0.00940547	0.0460321	chr11	NAV2	NM_001111018
10472	cg27410595	-0.0103289	0.0117953	chr11	TRIM29	NM_012101
10475	cg27416171	-0.0216143	0.0158792	chr11
10484	cg27446485	0.0287572	0.0325123	chr11
10488	cg27475169	0.0403027	0.0103424	chr11
10503	cg27512828	0.0155331	0.0282199	chr11	UVRAG	NM_003369
10544	cg27618216	-0.018758	0.0187082	chr11	PATE4	NM_001144874
10572	ch.11.1543446R	-0.0147198	0.0228085	chr11	NUMA1	NM_006185
27	cg00056578	0.0355195	0.0437314	chr12	KSR2	NM_173598
35	cg00084347	-0.00996551	0.0313455	chr12	DNAH10	NM_207437
40	cg00097357	0.0432405	0.0181055	chr12	SYT10	NM_198992
167	cg00359110	0.0326337	0.0427657	chr12	CAPS2	NM_032606
232	cg00500522	-0.0154474	0.0315966	chr12	STAT6	NM_003153
250	cg00545573	0.0226246	0.0371563	chr12	TAOK3	NM_016281
279	cg00603625	0.028859	0.0307439	chr12	CNOT2	NM_014515
347	cg00750518	-0.0211936	0.0364824	chr12	DCTN2	NM_006400
358	cg00769590	-0.0217857	0.0455778	chr12	WNT5B;WNT5B	NM_030775;NM_032642
403	cg00867626	-0.0226917	0.0337776	chr12	KDM2B;KDM2B	NM_032590;NM_001005366
465	cg00973286	-0.0208944	0.0307953	chr12	TNFRSF1A;TNFRSF1A	NM_001065;NM_001065
472	cg00989220	0.00728039	0.0470283	chr12	TNFRSF1A	NM_001065
491	cg01043616	0.0673929	0.0496698	chr12	ACCN2;ACCN2	NM_020039;NM_001095
514	cg01088404	0.126361	0.00712364	chr12	HDAC7;HDAC7	NM_001098416;NM_015401
547	cg01153442	-0.0113834	0.0335339	chr12	PDE3A	NM_000921
576	cg01202700	-0.00801618	0.0329332	chr12	TMEM132D	NM_133448
614	cg01280182	-0.0133611	0.0326294	chr12
619	cg01295392	0.0261708	0.0299887	chr12	ASCL4;ASCL4	NM_203436;NM_203436
620	cg01295673	0.0481863	0.0449137	chr12	RFC5;RFC5;RFC5;RFC5	NM_001130113;NM_001130112;NM_181578;NM_007370
[truncated: 8,599 more rows]

## Sheet: hcb_m
	Name	beta	adj.P.Val	chr	UCSC_RefGene_Name	UCSC_RefGene_Accession
8	cg00097790	-0.936854	0.0445639	chr1	LOC645166;LOC645166;LOC645166	NR_027354;NR_027356;NR_027355
14	cg00211609	-0.723523	0.0491073	chr1	FAM132A	NM_001014980
19	cg00307483	-0.586782	0.048302	chr1	WASF2	NM_006990
26	cg00419822	-0.383263	0.0447801	chr1
39	cg00714874	-1.4003	0.0489914	chr1	FCRLA	NM_032738
42	cg00777895	0.922774	0.0439416	chr1	SRP9;SRP9	NM_001130440;NM_003133
43	cg00807959	0.501691	0.0458297	chr1
50	cg00867230	-0.541947	0.0496017	chr1
83	cg01770831	0.544808	0.0445639	chr1	SMYD2	NM_020197
141	cg02898122	-0.566378	0.04022	chr1	RWDD3;RWDD3	NM_015485;NM_001128142
144	cg02930200	0.722687	0.0450116	chr1	DNALI1	NM_003462
145	cg02935097	-0.929155	0.0326098	chr1	BRDT	NM_207189
157	cg03218909	1.25238	0.0496608	chr1	HAPLN2	NM_021817
165	cg03324123	-0.927942	0.0444102	chr1	C1orf198;C1orf198	NM_001136494;NM_032800
174	cg03527274	-0.75069	0.0494418	chr1	PRDM16;PRDM16	NM_022114;NM_199454
176	cg03535361	-1.33305	0.0496017	chr1	CNIH4	NM_014184
177	cg03542686	-0.949356	0.0445639	chr1	CAPZB	NM_004930
200	cg03961984	1.27618	0.0460429	chr1	PARS2	NM_152268
201	cg03991333	1.74589	0.0488514	chr1	PANK4	NM_018216
206	cg04130657	1.90294	0.0370916	chr1	DEDD;DEDD;DEDD	NM_001039711;NM_032998;NM_001039712
215	cg04203508	0.659398	0.0285322	chr1	ATF3	NM_001030287
216	cg04211018	-0.392369	0.0357562	chr1	KANK4	NM_181712
247	cg04578903	0.72065	0.0446334	chr1
259	cg04871460	-1.00801	0.0285322	chr1	PRKCZ	NM_002744
281	cg05228408	-1.45807	0.0490989	chr1	CLCN6;CLCN6;MTHFR;CLCN6;CLCN6	NM_001286;NM_021736;NM_005957;NM_021737;NM_021735
310	cg05768141	0.516701	0.0496608	chr1	KCNJ10;KCNJ10	NM_002241;NM_002241
319	cg05944661	-1.72745	0.0370916	chr1
332	cg06188908	2.6855	0.0450116	chr1	C1orf84;MED8;MED8	NM_001012961;NM_052877;NM_201542
356	cg06712559	-0.791328	0.0370916	chr1	AGRN	NM_198576
364	cg06875189	-0.645781	0.0458297	chr1	CEPT1;DRAM2;CEPT1	NM_006090;NM_178454;NM_001007794
365	cg06883089	-0.333161	0.0428492	chr1	BEST4	NM_153274
369	cg06956052	-1.4528	0.0461108	chr1	ATP1A4	NM_144699
371	cg06991148	-0.979445	0.0443452	chr1	PRDM2;PRDM2	NM_012231;NM_001135610
379	cg07173112	-0.772712	0.0480937	chr1	TTLL10;TTLL10	NM_001130045;NM_153254
380	cg07175580	-0.763513	0.0485081	chr1	IL19	NM_153758
389	cg07251197	0.490206	0.04022	chr1
405	cg07423997	-1.6412	0.0357562	chr1
420	cg07948875	2.55824	0.0370916	chr1	NME7;NME7	NM_013330;NM_197972
425	cg08108965	3.22777	0.0346869	chr1
451	cg08715595	1.67095	0.0489914	chr1	RNF220	NM_018150
486	cg09804380	0.538855	0.0451706	chr1	PDPN;PDPN;PDPN;PDPN	NM_001006624;NM_001006625;NM_006474;NM_198389
502	cg10132838	-0.83906	0.0446334	chr1	TMEM51;TMEM51;TMEM51;C1orf126;TMEM51;TMEM51;TMEM51	NM_018022;NM_001136216;NM_001136217;NR_027136;NM_001136216;NM_001136217;NM_001136218
515	cg10375954	-1.86153	0.0496017	chr1	ACOT7;ACOT7;ACOT7;ACOT7	NM_181864;NM_181865;NM_181866;NM_007274
524	cg10504365	1.69191	0.0458297	chr1	TRIM67	NM_001004342
525	cg10512748	-0.462276	0.0444102	chr1	SNHG3-RCC1;RCC1;SNHG3-RCC1;RCC1;RCC1;SNHG3-RCC1	NR_030725;NM_001048195;NR_030726;NM_001269;NM_001048194;NM_001048199
526	cg10521767	-1.20967	0.0446334	chr1
555	cg11298786	-0.63515	0.0346869	chr1	WNT3A	NM_033131
568	cg11694026	-1.72462	0.0370916	chr1
582	cg11967292	0.799397	0.0445639	chr1	EPHX1	NM_001136018
596	cg12409547	-0.981106	0.0357562	chr1	HSPG2	NM_005529
598	cg12466599	-0.43437	0.0459029	chr1	ALPL;ALPL	NM_001127501;NM_000478
609	cg12796015	-0.539195	0.0423147	chr1	E2F2;E2F2	NM_004091;NM_004091
627	cg13174735	-1.14497	0.0458297	chr1
642	cg13423770	-1.55209	0.0370916	chr1	RHBG;RHBG	NR_026549;NM_020407
648	cg13476072	-0.683088	0.0467856	chr1	MTMR11;MTMR11	NM_001145862;NM_181873
674	cg13968398	-0.562762	0.0456189	chr1	MTR	NM_000254
693	cg14319235	0.842759	0.0410948	chr1	ELTD1	NM_022159
698	cg14500718	-1.43207	0.0357562	chr1	TMEM79;SMG5	NR_026678;NM_015327
721	cg14855124	-1.01775	0.0467856	chr1	GPR157	NM_024980
728	cg14960316	-0.388472	0.0447549	chr1	TMEM53	NM_024587
736	cg15102821	-1.18123	0.0447549	chr1	CALML6	NM_138705
737	cg15114013	1.60132	0.0447118	chr1	NFYC;NFYC;LOC100130557;NFYC;NFYC;NFYC	NM_014223;NM_001142590;NR_024567;NM_001142588;NM_001142589;NM_001142587
741	cg15209440	-0.378558	0.0489914	chr1
765	cg15927699	3.19528	0.0370916	chr1
769	cg16015205	-0.843552	0.0445639	chr1	SH3BGRL3	NM_031286
772	cg16046833	-0.729986	0.0488514	chr1	SNX7;SNX7	NM_015976;NM_152238
775	cg16120196	-0.633046	0.0489914	chr1
785	cg16291276	1.2483	0.0370916	chr1	CD34;CD34	NM_001025109;NM_001773
793	cg16552271	1.27951	0.0285322	chr1	KIAA1026;KIAA1026;KIAA1026;KIAA1026;KIAA1026	NM_201628;NM_015209;NM_001018001;NM_001018000;NM_001017999
803	cg16717773	2.95282	0.0439416	chr1	GBA;GBA;GBA;GBA;GBA	NM_001005742;NM_001005750;NM_000157;NM_001005741;NM_001005749
804	cg16728604	-0.559956	0.0443452	chr1	KIAA1522	NM_020888
841	cg17744604	4.88492	0.0467856	chr1	IL10	NM_000572
853	cg18156192	-1.16991	0.0410163	chr1	KCND3;KCND3	NM_172198;NM_004980
885	cg18886071	0.856196	0.0370916	chr1	SLAMF1;SLAMF1	NM_003037;NM_003037
910	cg19505194	-0.546654	0.0357562	chr1	CELA2B	NM_015849
918	cg19689322	1.28508	0.0370916	chr1	KCNQ4;KCNQ4	NM_004700;NM_172163
927	cg19864060	-2.02065	0.0285322	chr1
933	cg20065217	-1.26106	0.0370916	chr1
938	cg20141108	-1.1657	0.0491073	chr1
941	cg20165402	-1.43542	0.0389505	chr1	HIVEP3;HIVEP3	NM_024503;NM_001127714
946	cg20267775	-0.343417	0.0474731	chr1
968	cg20692268	-2.63792	0.0439416	chr1
969	cg20700731	-1.11054	0.0475017	chr1	EDN2	NM_001956
970	cg20706495	-0.631119	0.0434281	chr1
987	cg21170920	-0.473575	0.0439112	chr1	PAX7;PAX7;PAX7	NM_002584;NM_001135254;NM_013945
991	cg21286782	0.59187	0.0434281	chr1	FAM19A3;FAM19A3	NM_182759;NM_001004440
993	cg21295678	-0.360481	0.0370916	chr1
1006	cg21919968	-0.99278	0.0445639	chr1
1016	cg22505006	1.77481	0.0423147	chr1	ZBTB7B	NM_015872
1058	cg23643973	-2.1336	0.0446334	chr1
1060	cg23687103	-0.432528	0.0494418	chr1	MIIP	NM_021933
1065	cg23889047	-2.81787	0.0491208	chr1	CAMTA1	NM_015215
1074	cg24038105	-1.66218	0.0443452	chr1	FHAD1	NM_052929
1080	cg24152264	-1.31137	0.0410948	chr1
1089	cg24358047	-1.41952	0.048302	chr1
1108	cg24833674	2.45464	0.0467778	chr1	ILDR2	NM_199351
1110	cg24930749	1.01054	0.0439416	chr1
1116	cg25076881	-1.19543	0.0454944	chr1	OR10J1	NM_012351
1118	cg25143508	-1.74347	0.0489914	chr1	PRELP;PRELP	NM_201348;NM_002725
1149	cg25973092	-0.493342	0.0439416	chr1	SESN2	NM_031459
1151	cg26022257	-1.44235	0.0439416	chr1
1169	cg26257082	1.07253	0.0483638	chr1
1192	cg26687579	1.38979	0.0443452	chr1
1204	cg26933021	-1.22409	0.0357562	chr1
1216	cg27315157	1.64517	0.0444102	chr1	IFI44L;IFI44L	NM_006820;NM_006820
1222	cg27392551	-1.31836	0.0370916	chr1	C1orf223	NM_001145474
57	cg00982799	-0.901165	0.0389505	chr10	PTPRE;PTPRE	NM_130435;NM_006504
104	cg02114346	1.73921	0.0370916	chr10	PAOX;PAOX;PAOX	NM_152911;NM_207128;NM_207127
108	cg02172819	-1.47621	0.0496017	chr10	KCNMA1;KCNMA1;KCNMA1;KCNMA1	NM_001161353;NM_001161352;NM_002247;NM_001014797
115	cg02356566	-0.924258	0.0357562	chr10
170	cg03376308	1.37522	0.0357562	chr10
235	cg04440125	-0.664858	0.0467856	chr10	ARHGAP22	NM_021226
250	cg04714939	-0.614337	0.0446334	chr10	ZMIZ1	NM_020338
251	cg04726013	1.28395	0.0401944	chr10	LHPP;LHPP	NM_022126;NM_001167880
268	cg04996918	-0.980293	0.0445639	chr10	ENTPD7	NM_020354
269	cg05021029	-1.63955	0.0445639	chr10
284	cg05251190	-2.03344	0.0357562	chr10	MIR146B	NR_030169
287	cg05297677	-1.15356	0.0406032	chr10
321	cg05949800	0.647626	0.0410948	chr10	NKX2-3	NM_145285
341	cg06401999	-0.469769	0.0446334	chr10	MGMT	NM_002412
346	cg06466203	-1.01066	0.0370916	chr10	PTEN;KILLIN;PTEN	NM_000314;NM_001126049;NM_000314
349	cg06550984	0.905377	0.0439416	chr10	PTF1A	NM_178161
395	cg07299586	-0.72529	0.0490111	chr10	MYST4	NM_012330
482	cg09684112	1.99719	0.0410163	chr10	FRMD4A	NM_018027
522	cg10493125	-0.94696	0.0335237	chr10	TSPAN15	NM_012339
566	cg11660725	0.516013	0.0450116	chr10	ANKRD26	NM_014915
574	cg11820931	-0.959886	0.0458297	chr10	DDX21	NM_004728
576	cg11849692	1.83736	0.0489914	chr10	LDB1;LDB1	NM_001113407;NM_003893
638	cg13370460	2.52237	0.0447118	chr10
675	cg13977486	-1.48394	0.0346869	chr10	C10orf95;C10orf95	NM_024886;NM_024886
678	cg14043803	-0.704918	0.0439416	chr10
702	cg14568384	-1.64106	0.0445639	chr10	TMEM180	NM_024789
705	cg14581419	4.1282	0.048117	chr10	PSD	NM_002779
745	cg15280185	-1.27441	0.0485081	chr10
788	cg16401207	-1.81549	0.0410163	chr10	PRKG1;PRKG1	NM_001098512;NM_006258
813	cg16957758	-1.82471	0.0446334	chr10	ADARB2	NM_018702
840	cg17729694	-0.69138	0.0496017	chr10	GRID1	NM_017551
842	cg17789273	0.744098	0.0428492	chr10
872	cg18537454	1.5822	0.0370916	chr10
890	cg19008088	-0.451984	0.0467856	chr10	TLX1;TLX1NB	NM_005521;NM_001085398
897	cg19161112	0.406152	0.0490989	chr10	PTF1A	NM_178161
901	cg19223119	-1.74451	0.0370916	chr10	DIP2C	NM_014974
902	cg19225923	-0.565709	0.0370916	chr10	GTPBP4	NM_012341
924	cg19795235	-0.839838	0.0436723	chr10	MYO3A	NM_017433
928	cg19876302	-0.806345	0.0357562	chr10
939	cg20151301	-1.44207	0.0421706	chr10	ADARB2	NM_018702
943	cg20168761	-0.965031	0.0443452	chr10
1064	cg23801028	3.3075	0.0370916	chr10	CRTAC1	NM_018058
1081	cg24181174	-1.12422	0.0464255	chr10	TACC2;TACC2	NM_206862;NM_206861
1122	cg25268100	-0.401983	0.0406032	chr10	INPP5A	NM_005539
1166	cg26167841	3.16963	0.0447801	chr10
1170	cg26268044	0.79352	0.0285322	chr10	CCNJ;CCNJ;CCNJ	NM_001134376;NM_001134375;NM_019084
1214	cg27266257	2.05326	0.0439416	chr10	ASB13;ASB13	NR_024581;NM_024701
1225	cg27449572	2.48514	0.0467856	chr10	LOXL4	NM_032211
1232	ch.10.1915679F	0.904483	0.0463708	chr10
16	cg00248856	-0.621373	0.0326098	chr11	CCND1	NM_053056
18	cg00301033	-0.629862	0.0440517	chr11	TTC17	NM_018259
32	cg00489660	-1.10696	0.0467856	chr11	TNKS1BP1	NM_033396
58	cg00987015	0.650172	0.0370916	chr11	CHRM1;CHRM1	NM_000738;NM_000738
78	cg01368415	0.595521	0.0467607	chr11	MRPL11;MRPL11;MRPL11	NM_170739;NM_016050;NM_170738
91	cg01890712	2.49174	0.0370916	chr11	OR9Q1	NM_001005212
98	cg02023548	-1.75024	0.0467856	chr11	MRGPRD	NM_198923
110	cg02224369	-2.05835	0.0361025	chr11	CD59;CD59;CD59;CD59	NM_000611;NM_203330;NM_203329;NM_203331
140	cg02873384	-1.01256	0.0423147	chr11	OR51G2	NM_001005238
179	cg03559942	-1.60501	0.0357562	chr11	ZBTB3	NM_024784
203	cg04057766	-0.778564	0.0437913	chr11	PPP1R14B	NM_138689
213	cg04191712	-1.221	0.0445639	chr11	TBX10	NM_005995
222	cg04321396	-1.04834	0.0480937	chr11	KAT5;KAT5;KAT5	NM_182710;NM_182709;NM_006388
236	cg04450855	-1.27688	0.0370916	chr11	DENND5A	NM_015213
238	cg04469731	2.12444	0.0370916	chr11	APLP2;APLP2;APLP2;APLP2;APLP2;APLP2	NR_024516;NR_024515;NM_001142276;NM_001642;NM_001142277;NM_001142278
246	cg04552555	1.66683	0.0427954	chr11	HCCA2	NM_053005
275	cg05130679	-0.997104	0.0439416	chr11	AMOTL1	NM_130847
277	cg05179125	2.08685	0.0370916	chr11	HRASLS5;HRASLS5;HRASLS5	NM_001146729;NM_054108;NM_001146728
304	cg05555951	-0.445483	0.046728	chr11	OR8H2	NM_001005200
353	cg06648455	-0.978364	0.0445639	chr11	ANO1;ANO1	NM_018043;NR_030691
375	cg07102320	2.05386	0.0496017	chr11
383	cg07194984	-0.833516	0.0417248	chr11
408	cg07611000	0.892199	0.0450116	chr11	EHBP1L1	NM_001099409
429	cg08227583	-0.848895	0.0434281	chr11
434	cg08437786	-2.18408	0.0428492	chr11	IFITM5	NM_001025295
441	cg08529848	-0.606153	0.0439416	chr11	OSBP	NM_002556
467	cg09203240	-1.00487	0.0439416	chr11	LRP5	NM_002335
470	cg09255694	-0.929375	0.0439416	chr11	RRM1;RRM1	NM_001033;NM_001033
489	cg09854615	1.50527	0.0370916	chr11
514	cg10371523	-0.716612	0.04022	chr11	SHANK2;SHANK2	NM_012309;NM_133266
521	cg10462961	-1.6611	0.0480527	chr11
529	cg10649130	0.626936	0.0439416	chr11
531	cg10679277	1.18527	0.0450116	chr11	ETS1;ETS1;ETS1	NM_001143820;NM_001162422;NM_005238
541	cg10891482	-2.28106	0.0447549	chr11	MS4A8B;MS4A8B	NM_031457;NM_031457
545	cg10966440	-0.617218	0.0357562	chr11	OPCML;OPCML	NM_002545;NM_001012393
548	cg11054816	2.68028	0.047511	chr11	BACE1;BACE1;BACE1;BACE1	NM_138972;NM_138971;NM_138973;NM_012104
605	cg12562828	-1.21547	0.0485081	chr11
606	cg12758867	-0.641887	0.0445639	chr11	EHBP1L1	NM_001099409
607	cg12782654	0.742151	0.0425278	chr11	CD248	NM_020404
612	cg12833018	-1.53752	0.0423147	chr11	SCGB2A2	NM_002411
622	cg13010014	3.4068	0.04022	chr11	ROBO3	NM_022370
631	cg13279956	-0.519248	0.0450116	chr11	SPRYD5	NM_032681
637	cg13332953	-1.23203	0.0445639	chr11	DKK3;DKK3;DKK3	NM_001018057;NM_015881;NM_013253
656	cg13563074	-2.24925	0.0326098	chr11	OVCH2	NM_198185
667	cg13806267	-1.41176	0.0428492	chr11
686	cg14186937	0.647034	0.0346869	chr11	TRPC6	NM_004621
699	cg14554170	-0.668664	0.0421706	chr11	ILK;ILK;ILK;ILK;RRP8	NM_001014794;NM_001014795;NM_001014795;NM_004517;NM_015324
707	cg14598198	0.629963	0.0436723	chr11	CDKN1C;CDKN1C;CDKN1C	NM_000076;NM_001122630;NM_001122631
719	cg14841965	-0.306551	0.0444102	chr11	OR6T1	NM_001005187
727	cg14927277	-0.674991	0.0447118	chr11	METT5D1;KIF18A;METT5D1;METT5D1;METT5D1	NM_152636;NM_031217;NM_152636;NM_001113528;NM_001113528
739	cg15164881	-0.559148	0.0467856	chr11	TSPAN4;TSPAN4;TSPAN4;TSPAN4;TSPAN4;TSPAN4;TSPAN4	NM_001025239;NM_001025237;NM_001025234;NM_001025235;NM_001025236;NM_001025238;NM_003271
748	cg15362894	-1.59241	0.0423147	chr11
749	cg15375883	-0.727752	0.0446334	chr11	ST3GAL4	NM_006278
751	cg15404043	-1.23469	0.0490989	chr11
756	cg15534755	2.95778	0.0445639	chr11	TAGLN;TAGLN	NM_003186;NM_001001522
758	cg15618210	-0.798129	0.0397422	chr11	OPCML	NM_001012393
759	cg15670290	2.37695	0.0389505	chr11	HNRNPUL2;TTC9C	NM_001079559;NM_173810
771	cg16046376	-0.786896	0.0490989	chr11	PC;PC	NM_000920;NM_001040716
784	cg16279835	2.84539	0.0370916	chr11	ATG2A	NM_015104
786	cg16313944	-0.631901	0.0335237	chr11	ALDH3B1	NM_001161473
792	cg16524733	4.23343	0.0370916	chr11	TAGLN;TAGLN;TAGLN;TAGLN	NM_001001522;NM_003186;NM_003186;NM_001001522
795	cg16568681	-2.89544	0.0434281	chr11	CD59;CD59;CD59;CD59	NM_000611;NM_203330;NM_203329;NM_203331
799	cg16651314	-1.25691	0.0410163	chr11
808	cg16803548	-1.31747	0.0335237	chr11
822	cg17253407	-0.422329	0.0444102	chr11
849	cg18009574	-0.600015	0.04022	chr11	NAV2;NAV2;NAV2	NM_182964;NM_001111018;NM_145117
850	cg18014109	-0.553528	0.0388807	chr11
868	cg18484189	-0.709592	0.0447118	chr11	NLRP10	NM_176821
891	cg19044550	-0.54643	0.0445639	chr11
905	cg19316647	-0.331183	0.0445639	chr11
972	cg20725239	-0.680987	0.0483638	chr11	HEPACAM;HEPACAM	NM_152722;NM_152722
983	cg21002528	1.92172	0.0401944	chr11	CRY2;CRY2	NM_021117;NM_001127457
1002	cg21809711	-0.704476	0.0439416	chr11	FKBP2;FKBP2;FKBP2	NM_004470;NM_057092;NM_001135208
1008	cg22216413	1.24369	0.0443452	chr11	ANO3	NM_031418
1026	cg22878054	-1.22711	0.0357562	chr11	CNTN5;CNTN5	NM_014361;NM_175566
1031	cg22996783	-0.497853	0.0421854	chr11
1046	cg23371208	-0.773575	0.0428492	chr11	MIR130A	NR_029673
1063	cg23796481	0.410853	0.0370916	chr11	BAD;GPR137;GPR137;BAD;GPR137;GPR137	NM_032989;NM_020155;NM_001170726;NM_004322;NM_001170880;NM_001170881
1066	cg23895722	4.73662	0.0370916	chr11	C11orf45;KCNJ5	NM_145013;NM_000890
1101	cg24689245	-0.71809	0.0445639	chr11	DGAT2	NM_032564
1104	cg24720849	3.35862	0.0490989	chr11	SYT8	NM_138567
1136	cg25608626	-0.911327	0.049359	chr11	DSCAML1	NM_020693
1142	cg25798460	-1.47348	0.0467856	chr11	OR56A5	NM_001146033
1155	cg26051413	2.46427	0.0437481	chr11	ASCL2	NM_005170
1176	cg26369594	-1.04832	0.0370916	chr11	HCCA2	NM_053005
1180	cg26427070	1.09802	0.0489914	chr11	TRAF6;TRAF6	NM_004620;NM_145803
1183	cg26459819	1.0792	0.0439416	chr11	C11orf93;C11orf92	NM_001136105;NM_207429
1189	cg26638011	0.656018	0.0370916	chr11	VPS37C	NM_017966
1195	cg26731131	-2.02274	0.0467856	chr11
1221	cg27389255	1.86396	0.0477772	chr11	PDE3B;PSMA1	NM_000922;NM_148976
1229	cg27618216	-0.75772	0.0401944	chr11	PATE4	NM_001144874
46	cg00833080	-2.66238	0.047484	chr12
74	cg01295673	1.91914	0.0370916	chr12	RFC5;RFC5;RFC5;RFC5	NM_001130113;NM_001130112;NM_181578;NM_007370
86	cg01802493	1.46766	0.0346869	chr12
92	cg01911186	-0.564053	0.0461108	chr12	CREBL2	NM_001310
107	cg02153528	-1.57551	0.0370916	chr12	OBFC2B	NM_024068
112	cg02262056	-0.677112	0.0439416	chr12
152	cg03140135	-1.60919	0.0447549	chr12	EMP1	NM_001423
175	cg03533058	-0.373136	0.0443452	chr12
188	cg03672499	-0.711444	0.0439416	chr12	CLEC4C;CLEC4C;CLEC4C;CLEC4C	NM_130441;NM_203503;NM_130441;NM_203503
209	cg04149773	-0.598292	0.0467856	chr12	ADCY6	NM_020983
231	cg04404543	-1.77013	0.0447549	chr12	ATF7;ATF7	NM_001130060;NM_006856
261	cg04888174	-0.9423	0.0479338	chr12
312	cg05845030	-2.41199	0.0445639	chr12	DCN;DCN;DCN;DCN;DCN;DCN;DCN	NM_133503;NM_133506;NM_133503;NM_133507;NM_133505;NM_133504;NM_001920
340	cg06374807	-0.43126	0.0451706	chr12	GPR133	NM_198827
352	cg06598386	-3.76758	0.0370916	chr12
382	cg07178945	1.46189	0.0370916	chr12	FGF23;FGF23	NM_020638;NM_020638
411	cg07689032	2.5905	0.0437481	chr12	MARS	NM_004990
430	cg08237551	-0.617085	0.0489914	chr12	TMEM120B;RHOF	NM_001080825;NM_019034
498	cg10080553	-0.334616	0.0467856	chr12
503	cg10143811	1.03362	0.0437481	chr12	LMO3;LMO3	NM_018640;NM_001001395
540	cg10884544	-1.92695	0.0439416	chr12	LOC253724	NR_027249
561	cg11439695	-0.880092	0.0428492	chr12	CACNA1C;CACNA1C;CACNA1C;CACNA1C;CACNA1C;CACNA1C;CACNA1C;CACNA1C;CACNA1C;CACNA1C;CACNA1C;CACNA1C;CACNA1C;CACNA1C;CACNA1C;CACNA1C;CACNA1C;CACNA1C;CACNA1C;CACNA1C;CACNA1C;CACNA1C;CACNA1C	NM_001129844;NM_001129827;NM_001129839;NM_001129834;NM_001129841;NM_000719;NM_001129830;NM_001167625;NM_001129843;NM_001167624;NM_001129835;NM_001129837;NM_001167623;NM_001129840;NM_199460;NM_001129833;NM_001129832;NM_001129829;NM_001129846;NM_001129836;NM_001129838;NM_001129831;NM_001129842
563	cg11510999	0.77664	0.0489914	chr12	ITGB7	NM_000889
580	cg11915525	-1.66215	0.0467856	chr12	C12orf70	NM_001145010
587	cg12095505	-1.30222	0.0439416	chr12	GUCY2C;GUCY2C	NM_004963;NM_004963
660	cg13653195	-0.741008	0.0439416	chr12
680	cg14059257	1.64758	0.046328	chr12	KRT7	NM_005556
688	cg14212748	-1.44688	0.0467856	chr12	KRT18;KRT18	NM_000224;NM_199187
726	cg14911708	0.608542	0.0490509	chr12	RBM19;RBM19;RBM19	NM_001146698;NM_016196;NM_001146699
819	cg17183905	-1.9521	0.0441859	chr12	TRPV4;TRPV4	NM_147204;NM_021625
865	cg18440199	1.12439	0.0467856	chr12	LOC283392;TRHDE;LOC283392	NR_026837;NM_013381;NR_026836
887	cg18944984	-1.92008	0.04022	chr12	NR1H4	NM_005123
997	cg21654404	-0.619806	0.0485081	chr12	SUDS3;SUDS3	NM_022491;NM_022491
1015	cg22497336	-0.552648	0.0485081	chr12	ACVRL1;ACVRL1	NM_001077401;NM_000020
1019	cg22564731	-1.49558	0.0410948	chr12	PXN;PXN;PXN	NM_001080855;NM_025157;NM_002859
1022	cg22621535	-0.818996	0.0434281	chr12	DAO	NM_001917
1039	cg23152216	-0.931518	0.0461108	chr12	KRAS;KRAS	NM_004985;NM_033360
1067	cg23896972	-1.55479	0.0491073	chr12	ORAI1	NM_032790
1084	cg24229691	-1.06515	0.0439416	chr12	MFAP5	NM_003480
1096	cg24502904	1.95059	0.0357562	chr12	EIF4B	NM_001417
1106	cg24768463	-0.520043	0.0410948	chr12	ATN1;ATN1	NM_001940;NM_001007026
1107	cg24795867	-0.494609	0.039108	chr12	WNT5B;WNT5B	NM_030775;NM_032642
1113	cg25031476	-1.24244	0.0443452	chr12	PTPRR;PTPRR	NM_130846;NM_002849
1160	cg26126381	1.31729	0.048302	chr12	TMBIM4	NM_016056
1191	cg26686150	-1.67176	0.0458297	chr12
1211	cg27129363	-0.393163	0.0480535	chr12	NDUFA12	NM_018838
36	cg00637144	-1.03205	0.0326098	chr13	DHRS12;DHRS12	NM_001031719;NM_024705
60	cg01044129	-1.50706	0.0443452	chr13	SMAD9;SMAD9	NM_001127217;NM_005905
81	cg01559904	-0.980113	0.0440241	chr13	LPAR6;LPAR6;RB1	NM_001162497;NM_005767;NM_000321
103	cg02099194	-1.85927	0.048302	chr13	TNFSF11;TNFSF11	NM_003701;NM_033012
289	cg05331252	-0.474059	0.0439112	chr13
322	cg05968268	-1.25077	0.0370916	chr13
378	cg07159518	0.803968	0.0357562	chr13
513	cg10328297	-1.41431	0.0451706	chr13	SLC25A15	NM_014252
543	cg10936999	-0.814411	0.0474731	chr13	TPT1;SNORA31	NM_003295;NR_002967
597	cg12454229	-1.61343	0.0389505	chr13
614	cg12900467	0.737876	0.0357562	chr13	LATS2;LATS2	NM_014572;NM_014572
683	cg14135807	-0.507845	0.0443452	chr13	UCHL3	NM_006002
684	cg14150115	2.82112	0.0490701	chr13
722	cg14857764	1.78358	0.0370916	chr13
903	cg19238349	-0.809643	0.0397721	chr13	CAB39L;CAB39L	NM_001079670;NM_030925
940	cg20154264	2.71693	0.0370916	chr13	UPF3A;UPF3A	NM_023011;NM_080687
984	cg21106946	-1.04154	0.0439416	chr13
1021	cg22605037	-0.837931	0.0440517	chr13
1062	cg23781398	1.50552	0.0490701	chr13	ATP12A	NM_001676
1158	cg26095546	1.15724	0.0370916	chr13	C13orf23;C13orf23	NM_025138;NM_170719
1179	cg26406074	0.783543	0.0357562	chr13	NBEA	NM_015678
64	cg01101865	1.15079	0.0437481	chr14	FLJ43390	NR_015358
94	cg01955025	-0.914119	0.0490509	chr14	TTC7B	NM_001010854
109	cg02175033	3.0416	0.0467778	chr14	KIAA0247	NM_014734
142	cg02903275	-0.889796	0.0445639	chr14
180	cg03564620	-0.688282	0.0447549	chr14	MYH6	NM_002471
225	cg04379738	1.39491	0.0357562	chr14	POLE2	NM_002692
260	cg04881585	0.512644	0.0410163	chr14
263	cg04924056	2.7669	0.0440517	chr14	AK7	NM_152327
283	cg05249479	2.89294	0.0443452	chr14	EVL	NM_016337
292	cg05365578	0.564102	0.0434281	chr14	IFI27L2;IFI27L2	NM_032036;NM_032036
293	cg05369327	2.04731	0.0370916	chr14
423	cg08050748	1.08682	0.0445639	chr14	TRIM9;TRIM9	NM_052978;NM_015163
504	cg10191005	-1.14975	0.0443452	chr14	DIO3OS	NR_002770
536	cg10797387	-1.4615	0.0285322	chr14	INF2;INF2;INF2	NM_001031714;NM_032714;NM_022489
641	cg13416283	0.418836	0.0458297	chr14	HSP90AA1;HSP90AA1	NM_005348;NM_001017963
682	cg14120984	-0.615072	0.0440517	chr14	KIF26A	NM_015656
691	cg14289469	0.824783	0.0439416	chr14
717	cg14729455	-0.361943	0.0471394	chr14	TXNDC16;TXNDC16;TXNDC16;TXNDC16;GPR137C	NM_001160047;NM_001160047;NM_020784;NM_020784;NM_001099652
783	cg16273961	1.10535	0.0370916	chr14	CNIH	NM_005776
858	cg18319790	-0.613147	0.0451706	chr14	C14orf68	NM_207117
861	cg18403361	1.16777	0.04022	chr14	CLEC14A	NM_175060
925	cg19834855	-1.12623	0.0443452	chr14
926	cg19838043	-0.589496	0.0439416	chr14	ZFYVE21	NM_024071
934	cg20076126	-1.36716	0.0458542	chr14	GALNTL1;GALNTL1	NM_001168368;NM_020692
980	cg20931134	-0.734381	0.0445639	chr14	RAD51L1	NM_133509
1047	cg23400512	0.429136	0.0425278	chr14	FLRT2	NM_013231
1134	cg25584474	-0.561652	0.0285322	chr14	FRMD6;FRMD6	NM_152330;NM_001042481
1159	cg26107597	2.0073	0.0437913	chr14	COCH;COCH	NM_001135058;NM_004086
1175	cg26344619	-1.70802	0.0285322	chr14	FLVCR2	NM_017791
1181	cg26431018	-0.362116	0.0490989	chr14
1233	ch.14.21373F	1.07129	0.0490509	chr14
11	cg00155844	-0.428382	0.0370916	chr15	HERC2	NM_004667
53	cg00884334	0.495449	0.0439416	chr15
54	cg00942495	-0.910052	0.0489914	chr15	FBXO22;FBXO22	NM_012170;NM_147188
71	cg01229787	-2.21108	0.0489914	chr15
90	cg01889112	0.675054	0.0410948	chr15	FAM63B;FAM63B	NM_001040453;NM_001040450
122	cg02471940	-2.09386	0.0440517	chr15
133	cg02794784	3.02564	0.0488514	chr15	SYNM;SYNM	NM_015286;NM_145728
167	cg03357077	-1.50488	0.0489914	chr15	SNAPC5	NM_006049
169	cg03369250	-0.487219	0.0357562	chr15	GABPB1;GABPB1;FLJ10038;GABPB1;GABPB1;LOC100129387;GABPB1	NM_002041;NM_181427;NR_026891;NM_016654;NM_016655;NR_024490;NM_005254
172	cg03449379	-0.587822	0.0357562	chr15	CYP11A1;CYP11A1	NM_000781;NM_001099773
208	cg04138492	-1.13323	0.0417248	chr15	LOC283731;ISLR2;ISLR2	NR_027073;NM_001130136;NM_001130137
256	cg04813911	-2.39245	0.0437481	chr15	CILP	NM_003613
262	cg04910470	-0.520937	0.0420051	chr15	RTF1	NM_015138
438	cg08463231	-1.03396	0.0373568	chr15
452	cg08732418	-0.497886	0.0491073	chr15	DLL4	NM_019074
485	cg09799186	-0.812477	0.0460429	chr15
508	cg10258860	-1.10961	0.0335237	chr15
516	cg10422709	4.93396	0.0250231	chr15
564	cg11517728	-0.88776	0.0335237	chr15	CYFIP1;CYFIP1;CYFIP1	NM_014608;NM_001033028;NM_001033028
571	cg11797222	0.527935	0.0447118	chr15	MAP2K1;MAP2K1	NM_002755;NM_002755
618	cg12950645	-1.69216	0.0370916	chr15
624	cg13048962	-1.63338	0.0370916	chr15	SNAPC5	NM_006049
647	cg13474370	2.67517	0.0485081	chr15	RBPMS2	NM_194272
657	cg13619277	-0.473743	0.0437913	chr15	FMN1	NM_001103184
669	cg13859847	-0.77392	0.048302	chr15	ANKRD34C	NM_001146341
720	cg14852355	1.09253	0.0370916	chr15	LOXL1	NM_005576
778	cg16179521	-3.12911	0.0468401	chr15	PCSK6;PCSK6;PCSK6;PCSK6;PCSK6;PCSK6;PCSK6;PCSK6	NM_002570;NM_138320;NM_138319;NM_138324;NM_138323;NM_138325;NM_138322;NM_138321
855	cg18180935	1.11964	0.0357562	chr15	RAB27A	NM_183235
886	cg18919684	3.21312	0.0397422	chr15	SCAMP5	NM_138967
904	cg19295951	1.291	0.0445639	chr15	DUOX1;DUOX1;DUOXA1;DUOXA1	NM_175940;NM_017434;NM_144565;NM_144565
945	cg20259814	-1.03006	0.0370916	chr15
953	cg20359888	-0.897961	0.0445639	chr15	ALPK3	NM_020778
965	cg20608329	-0.771716	0.0370916	chr15	GOLGA9P	NR_024074
1012	cg22294181	-1.02699	0.0404149	chr15	SLC28A1;SLC28A1	NM_201651;NM_004213
1079	cg24147582	3.07214	0.0467856	chr15	TYRO3	NM_006293
1090	cg24358771	-0.918456	0.0496017	chr15	CYFIP1;CYFIP1	NM_014608;NM_001033028
1092	cg24399529	-2.49237	0.0285322	chr15	MIR548H4;TMEM84	NR_031680;NR_026949
1103	cg24694665	-0.462419	0.0439416	chr15
1130	cg25505106	-0.383323	0.0436299	chr15	FBN1	NM_000138
1133	cg25539979	1.0441	0.0357562	chr15
1184	cg26505663	0.779931	0.0462697	chr15	GRINL1A;GRINL1A;GCOM1;GCOM1;GRINL1A	NM_015532;NR_027390;NM_001018090;NM_001018091;NM_001018102
22	cg00381442	-0.563678	0.0410948	chr16	FAM92B	NM_198491
125	cg02615214	-1.01577	0.0357562	chr16
143	cg02925427	-1.16999	0.0461108	chr16
146	cg02935562	-0.59109	0.0445639	chr16	IQCK	NM_153208
155	cg03190267	-0.766431	0.0443452	chr16	NTN3	NM_006181
163	cg03284670	-0.612819	0.0490509	chr16	CES7;CES7	NM_001143685;NM_145024
173	cg03478444	-0.741521	0.0443452	chr16	C16orf78	NM_144602
204	cg04069539	1.90333	0.0445639	chr16	ACSF3;ACSF3;ACSF3	NM_174917;NR_023316;NM_001127214
210	cg04152616	-0.331333	0.0496017	chr16
223	cg04347161	-0.853912	0.0467856	chr16	POLR2C	NM_032940
257	cg04815601	-0.632973	0.0443452	chr16	ZNF646	NM_014699
288	cg05319212	0.523693	0.0446334	chr16	NAE1;NAE1;NAE1	NM_001018159;NM_003905;NM_001018160
306	cg05646765	-0.472823	0.0407005	chr16
323	cg05969150	-2.81947	0.0439416	chr16	ZFHX3;ZFHX3	NM_001164766;NM_006885
328	cg06125461	-0.383659	0.0370916	chr16	CDH11	NM_001797
338	cg06351965	-0.585961	0.0439416	chr16	PLK1	NM_005030
342	cg06407259	-2.1157	0.0439112	chr16	FBXL19	NM_001099784
373	cg07066067	0.351312	0.0491208	chr16	KCTD5	NM_018992
376	cg07118953	-1.31758	0.0427954	chr16	LOC146336	NR_027242
385	cg07223648	-0.823441	0.0440517	chr16	NLRC5	NM_032206
396	cg07303450	2.8965	0.0444102	chr16	DOC2A	NM_003586
463	cg09103960	1.13024	0.0357562	chr16	LOC283856;GNAO1;GNAO1;GNAO1;GNAO1	NR_027078;NM_138736;NM_138736;NM_020988;NM_020988
474	cg09389370	-0.768755	0.0439416	chr16
477	cg09539739	-0.838494	0.0467856	chr16	LONP2	NM_031490
695	cg14470121	-0.825809	0.0471957	chr16	IFT140;TMEM204	NM_014714;NM_024600
787	cg16367606	-1.8936	0.0443452	chr16	ATXN1L;ZNF821	NR_024612;NM_017530
790	cg16484042	-2.12715	0.0493338	chr16
794	cg16568360	-1.98471	0.0370916	chr16	TAOK2;TAOK2	NM_004783;NM_016151
807	cg16773814	-0.796567	0.0496017	chr16	JPH3	NM_020655
1053	cg23481246	-1.81959	0.0445639	chr16	STUB1;JMJD8	NM_005861;NM_001005920
1234	ch.16.50217098R	3.5441	0.0370916	chr16
10	cg00140914	-1.06331	0.0406032	chr17	WNT3	NM_030753
61	cg01046511	1.21751	0.0370916	chr17	KDM6B	NM_001080424
82	cg01728445	-0.719145	0.0467856	chr17	TLK2;TLK2	NM_006852;NM_001112707
88	cg01836438	-0.887824	0.0462697	chr17	TLCD2	NM_001164407
124	cg02593766	1.48441	0.0496017	chr17	MYCBPAP;EPN3	NM_032133;NM_017957
139	cg02870485	-1.67297	0.0467856	chr17
150	cg03062002	-0.663083	0.0483638	chr17	CCR10	NM_016602
158	cg03221483	3.73776	0.0346869	chr17	SEPT9;SEPT9;SEPT9	NM_001113492;NM_001113491;NM_006640
161	cg03273420	-0.557724	0.0445639	chr17	SMCR7;SMCR7;SMCR7	NM_139162;NM_148886;NM_001144900
166	cg03354476	-1.45917	0.0335237	chr17	ASGR1	NM_001671
178	cg03547245	1.65332	0.0467856	chr17	MSI2;MSI2	NM_138962;NM_170721
193	cg03838635	-0.614084	0.0450116	chr17
195	cg03854564	2.03607	0.0370916	chr17	WDR81;WDR81;WDR81	NM_001163811;NM_001163673;NM_152348
198	cg03918523	0.449718	0.0370916	chr17	RNFT1	NM_016125
205	cg04115702	-0.345025	0.0370916	chr17	HRNBP3	NM_001082575
220	cg04303571	-0.636446	0.0270528	chr17
234	cg04439252	-1.46032	0.0434281	chr17	STAT3;STAT3;STAT3	NM_213662;NM_003150;NM_139276
239	cg04478251	2.67308	0.0285322	chr17	ABR;ABR;ABR	NM_021962;NM_001092;NM_001159746
253	cg04731120	-0.95318	0.0439416	chr17	ATAD5	NM_024857
274	cg05114606	1.36743	0.0401944	chr17
285	cg05252213	-2.05555	0.0326098	chr17
290	cg05354521	-0.540077	0.0467856	chr17	C17orf70;C17orf70;C17orf70	NM_025161;NM_001109760;NM_025161
291	cg05355301	-1.57433	0.0439416	chr17	KRT40	NM_182497
299	cg05460226	3.24833	0.0439416	chr17	PIK3R5;PIK3R5	NM_014308;NM_001142633
303	cg05527785	2.10438	0.0453558	chr17	HOXB4	NM_024015
309	cg05716556	-1.2812	0.0447701	chr17	ABI3;GNGT2;ABI3	NM_016428;NM_031498;NM_001135186
351	cg06589596	-0.438202	0.0357562	chr17	GSDMA	NM_178171
390	cg07257441	-0.382832	0.0458542	chr17	SLFN12L	NM_001145027
402	cg07337250	-0.588974	0.0401944	chr17	USP43	NM_153210
410	cg07670516	1.34023	0.0485081	chr17	ZNF232	NM_014519
448	cg08691422	-0.826815	0.0388819	chr17	TP53;WRAP53;TP53;TP53;TP53	NM_000546;NM_001143990;NM_001126113;NM_001126112;NM_001126114
464	cg09145534	-0.957102	0.0465457	chr17
465	cg09161455	0.88796	0.0443452	chr17	NR1D1	NM_021724
476	cg09463656	1.59205	0.0499092	chr17	HS3ST3A1	NM_006042
495	cg10030648	-0.513941	0.0468011	chr17	SHISA6	NM_207386
510	cg10277912	-1.52497	0.0497472	chr17	GPS2	NM_004489
511	cg10299448	0.652147	0.0485081	chr17	GAS7	NM_201433
533	cg10698920	-1.67973	0.0357562	chr17	TEX2	NM_018469
552	cg11161417	-0.526935	0.0357562	chr17	SPACA3	NM_173847
586	cg12076102	-1.32979	0.0447549	chr17	ICAM2;ICAM2;ICAM2;ICAM2;ICAM2	NM_001099789;NM_001099786;NM_001099787;NM_001099788;NM_000873
604	cg12559119	2.33352	0.0467856	chr17
653	cg13521991	-0.356252	0.0496017	chr17	KIF2B	NM_032559
663	cg13691192	-0.595718	0.0445639	chr17
681	cg14066471	1.92357	0.0331856	chr17	RAB37	NM_175738
718	cg14827924	-0.543884	0.0489914	chr17
732	cg14999189	-0.848508	0.0467856	chr17	RAP1GAP2;RAP1GAP2	NM_015085;NM_001100398
753	cg15416179	-1.57901	0.0489914	chr17	MAP2K3	NM_145109
789	cg16449699	1.07302	0.0445639	chr17	IGF2BP1;IGF2BP1	NM_001160423;NM_006546
806	cg16755067	-1.59675	0.048302	chr17
812	cg16926389	0.607028	0.0489914	chr17	CCDC46	NM_145036
829	cg17560340	-0.770048	0.0427954	chr17	RNMTL1;GLOD4	NM_018146;NM_016080
834	cg17615115	-0.974617	0.0446334	chr17
844	cg17896880	-2.10203	0.0370916	chr17
848	cg17943663	-2.11672	0.0350869	chr17	CDK3	NM_001258
883	cg18853199	1.27164	0.0450116	chr17	2018-09-09	NM_001113491
892	cg19057899	-0.797482	0.0445639	chr17	IGF2BP1;IGF2BP1	NM_006546;NM_001160423
896	cg19159842	-0.893189	0.0439416	chr17	ITGB4;ITGB4;ITGB4	NM_001005731;NM_001005619;NM_000213
908	cg19416879	0.800787	0.0490509	chr17	COIL	NM_004645
937	cg20131968	-0.960456	0.0444102	chr17	CCDC47	NM_020198
947	cg20272962	1.24042	0.0467856	chr17	LPO;LPO;LPO	NM_006151;NR_027647;NM_001160102
952	cg20355401	-0.577883	0.0447118	chr17	DCAKD;DCAKD	NM_001128631;NM_024819
954	cg20417351	1.52144	0.0447118	chr17	VPS53	NM_001128159
978	cg20864568	-1.54424	0.0461108	chr17	MAP3K14	NM_003954
1001	cg21808406	1.37123	0.0357562	chr17	CD68;CD68	NM_001040059;NM_001251
1010	cg22233844	0.576042	0.0467856	chr17	ITGAE	NM_002208
1032	cg23008871	2.42173	0.0250231	chr17
1050	cg23447202	-0.776235	0.0423147	chr17
1055	cg23556715	-1.29607	0.0370916	chr17	ICAM2;ICAM2;ICAM2;ICAM2;ICAM2	NM_001099789;NM_001099786;NM_001099787;NM_001099788;NM_000873
1082	cg24181662	0.779514	0.0439416	chr17	ZACN	NM_180990
1097	cg24535130	1.74583	0.0410948	chr17	NOTUM	NM_178493
1100	cg24681408	1.72617	0.0489914	chr17	LOC92659;MAFG	NR_015454;NM_002359
1124	cg25298039	-0.835297	0.0421854	chr17
1138	cg25691775	-1.01433	0.0490826	chr17	RAP1GAP2;RAP1GAP2	NM_001100398;NM_015085
1147	cg25890092	-1.64776	0.0439416	chr17	CD7	NM_006137
1165	cg26164164	0.730724	0.0397721	chr17	TOP2A;TOP2A	NM_001067;NM_001067
1188	cg26619043	0.494885	0.0488202	chr17	ARSG;SLC16A6	NM_014960;NM_004694
1198	cg26748477	-0.772008	0.0444102	chr17
1226	cg27479693	-0.505722	0.0445639	chr17	PEMT	NM_148172
6	cg00081465	-0.850405	0.0439261	chr18
33	cg00522579	-1.71044	0.0447549	chr18	MYOM1;MYOM1	NM_019856;NM_003803
106	cg02137495	-1.54914	0.0437481	chr18	LOC728606	NR_024259
135	cg02811232	3.34468	0.0489914	chr18
137	cg02840828	-0.545771	0.0427954	chr18	CNDP1	NM_032649
320	cg05945943	1.8729	0.0357562	chr18	BCL2;BCL2	NM_000657;NM_000633
344	cg06464594	0.788409	0.0447549	chr18	RNF152;RNF152	NM_173557;NM_173557
417	cg07912766	2.5835	0.0447801	chr18	SMAD2;SMAD2	NM_001135937;NM_001003652
581	cg11950360	2.26422	0.0346869	chr18	BRUNOL4;BRUNOL4;BRUNOL4;BRUNOL4	NM_001025088;NM_020180;NM_001025089;NM_001025087
588	cg12105108	0.608596	0.0357562	chr18	METTL4;NDC80;NDC80	NM_022840;NM_006101;NM_006101
809	cg16824643	0.914973	0.0485081	chr18
839	cg17688525	1.00966	0.0439416	chr18	L3MBTL4	NM_173464
967	cg20659941	1.21346	0.0454944	chr18	NEDD4L;NEDD4L;NEDD4L;NEDD4L;NEDD4L;NEDD4L;NEDD4L;NEDD4L;NEDD4L	NM_001144964;NM_015277;NM_001144966;NM_001144971;NM_001144965;NM_001144968;NM_001144967;NM_001144969;NM_001144970
973	cg20777956	-0.863025	0.0421854	chr18	BCL2;BCL2	NM_000633;NM_000657
1125	cg25385819	-1.09908	0.0397721	chr18	TGIF1	NM_174886
1139	cg25698978	0.390331	0.0461108	chr18	C18orf22	NM_024805
1152	cg26024874	2.98102	0.0370916	chr18	WDR7;WDR7	NM_052834;NM_015285
9	cg00127732	-0.429348	0.0410163	chr19	ERF	NM_006494
28	cg00423487	-0.979502	0.0440517	chr19	UBXN6;UBXN6	NM_025241;NM_001171091
38	cg00689214	-1.32714	0.0370916	chr19	TIMM50	NM_001001563
44	cg00815325	-1.49092	0.0489914	chr19	LONP1	NM_004793
85	cg01799015	-1.56402	0.0439416	chr19	PALM;PALM	NM_001040134;NM_002579
114	cg02306730	-0.620607	0.0450116	chr19	MAP4K1;EIF3K;MAP4K1	NM_007181;NM_013234;NM_001042600
132	cg02768390	-0.608894	0.0461108	chr19	CEACAM5	NM_004363
154	cg03169836	-2.1139	0.0445639	chr19	CIB3	NM_054113
181	cg03567652	-1.30497	0.0445639	chr19	LDLR	NM_000527
226	cg04388075	-0.984861	0.0494418	chr19	LRFN1	NM_020862
249	cg04714638	-0.87625	0.0461108	chr19	PDE4C;PDE4C	NM_001098818;NM_000923
301	cg05473871	-1.39222	0.048302	chr19	ADAMTSL5	NM_213604
325	cg05989429	-0.427567	0.0496017	chr19	ABCA7	NM_019112
339	cg06368093	0.786045	0.0285322	chr19	ZNF606	NM_025027
345	cg06466031	3.34921	0.0490509	chr19	ZNF790	NM_206894
347	cg06484340	1.31591	0.0439416	chr19	WIZ	NM_021241
363	cg06852309	-0.652765	0.0357562	chr19	KCNN1	NM_002248
414	cg07855933	-0.722833	0.0443452	chr19	CACNA1A;CACNA1A	NM_001127222;NM_001127221
424	cg08053103	-1.82548	0.0438281	chr19
428	cg08205443	-2.02834	0.0434281	chr19	ZNF787	NM_001002836
432	cg08289177	-0.455905	0.0428492	chr19	CXCL17;LIPE	NM_198477;NM_005357
440	cg08496742	0.601717	0.0467856	chr19	CCDC106;CCDC106	NM_013301;NM_013301
493	cg09993699	1.62658	0.0443452	chr19	BST2	NM_004335
509	cg10262891	-0.455107	0.0446334	chr19	GRIN2D	NM_000836
534	cg10709246	0.898943	0.0424548	chr19	PLVAP;PLVAP	NM_031310;NM_031310
539	cg10830496	2.34524	0.0471189	chr19	FXYD7	NM_022006
570	cg11781421	1.49307	0.0421854	chr19	HAPLN4	NM_023002
584	cg11984463	-1.43036	0.0431245	chr19	TTC9B	NM_152479
601	cg12506930	1.66495	0.0370916	chr19	ZNF154	NM_001085384
603	cg12525215	-0.53415	0.0439416	chr19	ZNF599;ZNF599	NM_001007248;NM_001007248
646	cg13461313	-0.420482	0.0456189	chr19	PGPEP1	NM_017712
650	cg13492223	-1.30505	0.0489914	chr19	FUT6;FUT6	NM_001040701;NM_000150
666	cg13788117	-1.90393	0.0428492	chr19
706	cg14584577	-0.579013	0.0410163	chr19	SAFB2;SAFB	NM_014649;NM_002967
713	cg14706720	0.398703	0.0496017	chr19	C19orf61	NM_019108
714	cg14707187	-0.541108	0.0489914	chr19
733	cg15011232	-0.780859	0.046328	chr19	ICAM5	NM_003259
740	cg15189233	1.79921	0.0461108	chr19	FFAR2	NM_005306
770	cg16015966	0.538936	0.0439416	chr19	DPY19L3	NM_207325
800	cg16675644	0.413514	0.0447801	chr19	GRIN2D	NM_000836
801	cg16694293	-0.72607	0.0445639	chr19	LONP1	NM_004793
810	cg16893618	-1.73293	0.0445639	chr19	CD97;CD97;CD97	NM_001784;NM_078481;NM_001025160
873	cg18591496	1.22656	0.0434281	chr19	CYP2A13	NM_000766
880	cg18741372	1.78098	0.0496017	chr19	PPP1R13L;PPP1R13L	NM_001142502;NM_006663
907	cg19358877	0.877115	0.0417248	chr19	ZNF471;ZNF471	NM_020813;NM_020813
920	cg19771372	-1.86197	0.0370916	chr19	CREB3L3;CREB3L3	NM_032607;NM_032607
936	cg20103311	-0.45396	0.0496608	chr19	KLK9	NM_012315
979	cg20909664	2.1596	0.0439416	chr19	IRF2BP1	NM_015649
996	cg21650765	2.555	0.0437913	chr19	ZNF559	NM_032497
1004	cg21869055	0.827411	0.0443452	chr19	KLK10;KLK10;KLK10	NM_002776;NM_001077500;NM_145888
1023	cg22703124	-0.565655	0.0357562	chr19	LOC100128675;HPN;HPN	NR_024562;NM_182983;NM_002151
1041	cg23254497	-1.5066	0.0370916	chr19
1077	cg24109744	-1.44743	0.0462697	chr19	KDM4B	NM_015015
1121	cg25233534	-0.754199	0.0450116	chr19	ZNF114	NM_153608
1173	cg26313152	1.6103	0.0440517	chr19	PNPLA6;PNPLA6;PNPLA6;PNPLA6;MCOLN1	NM_001166112;NM_001166111;NM_006702;NM_001166113;NM_020533
1193	cg26698460	3.88566	0.0437913	chr19	ZNF274;ZNF274;ZNF274	NM_133502;NM_016325;NM_016324
5	cg00050692	-1.4305	0.0270528	chr2	DNMT3A;DNMT3A;DNMT3A	NM_022552;NM_175630;NM_175629
27	cg00422995	-0.986352	0.0489914	chr2
55	cg00956987	-1.64097	0.0439416	chr2	BIRC6;MIR558	NM_016252;NR_030285
63	cg01092293	0.520695	0.0447549	chr2	LY75	NM_002349
67	cg01150918	-1.50405	0.0421706	chr2
128	cg02637654	-1.35244	0.0439416	chr2	SLC16A14	NM_152527
171	cg03405139	0.662784	0.0428492	chr2	GFPT1	NM_002056
190	cg03741458	-1.39552	0.0428492	chr2
194	cg03850035	-1.18531	0.0467856	chr2	EPHA4	NM_004438
214	cg04194947	2.21722	0.0428492	chr2
265	cg04947084	-0.351362	0.0467778	chr2
276	cg05135521	-2.45224	0.0437481	chr2	RBMS1;RBMS1	NM_002897;NM_016836
296	cg05417035	-0.900563	0.0489914	chr2
308	cg05692746	2.73289	0.0388807	chr2	LONRF2	NM_198461
337	cg06341701	2.97644	0.0370916	chr2	HOXD9	NM_014213
421	cg07949103	-0.978494	0.0410163	chr2
427	cg08183425	-0.898524	0.0471189	chr2
443	cg08570243	2.35301	0.0443452	chr2	NCRNA00116	NR_027063
459	cg09022485	-0.792506	0.0444102	chr2	TIA1;TIA1;TIA1;TIA1	NM_022173;NM_022037;NM_022037;NM_022173
475	cg09410752	1.20718	0.0370916	chr2	FLJ40330	NR_015424
483	cg09704401	-1.29569	0.0439416	chr2
501	cg10115387	-0.3714	0.0439416	chr2
544	cg10962805	-0.769256	0.0458297	chr2	CNTNAP5	NM_130773
591	cg12263377	-1.02654	0.0443511	chr2
617	cg12924525	-0.439493	0.0434281	chr2	TSSC1	NM_003310
633	cg13289755	-0.316046	0.0437481	chr2	GPC1	NM_002081
654	cg13527387	0.752253	0.0427954	chr2	SRD5A2	NM_000348
664	cg13699355	-0.314806	0.0460118	chr2
670	cg13908323	-0.589154	0.0445639	chr2
679	cg14055004	-1.07171	0.0496017	chr2
687	cg14190674	1.10116	0.0427954	chr2	FN1;FN1;FN1;FN1;FN1;FN1;FN1;FN1;FN1;FN1;FN1;FN1;FN1;FN1	NM_212474;NM_212476;NM_002026;NM_212482;NM_212475;NM_002026;NM_212475;NM_212474;NM_054034;NM_212476;NM_054034;NM_212478;NM_212482;NM_212478
725	cg14909930	0.711151	0.0471189	chr2	MBOAT2	NM_138799
731	cg14971567	-0.430425	0.0445639	chr2
766	cg15933451	-1.1161	0.0489914	chr2	ZAP70	NM_001079
776	cg16155655	0.709183	0.0401944	chr2	ACVR1C;ACVR1C;ACVR1C	NM_001111032;NM_145259;NM_001111033
838	cg17677030	0.649665	0.0370916	chr2	NRXN1;NRXN1;NRXN1	NM_004801;NM_001135659;NM_138735
845	cg17920653	1.12904	0.0477897	chr2	TUBA4A	NM_006000
847	cg17934130	-0.567673	0.0428492	chr2
856	cg18183163	1.78859	0.0443452	chr2	SP5	NM_001003845
871	cg18530075	-0.820858	0.0488514	chr2	EFR3B	NM_014971
874	cg18644791	2.11842	0.0439416	chr2
884	cg18863077	-0.437324	0.0445639	chr2	SH3YL1;ACP1;ACP1;ACP1;ACP1;SH3YL1	NM_001159597;NM_007099;NM_001040649;NM_004300;NR_024080;NM_015677
888	cg18951135	-2.75263	0.03953	chr2	FAM126B	NM_173822
898	cg19185846	2.61189	0.0489914	chr2
919	cg19699170	-1.05679	0.0454944	chr2
935	cg20090558	-0.530648	0.0434281	chr2
950	cg20348189	-0.758811	0.0357562	chr2	CRIM1	NM_016441
1020	cg22597665	-0.87048	0.04022	chr2	KIAA1841;KIAA1841	NM_032506;NM_001129993
1029	cg22927957	0.80673	0.0357562	chr2	STAMBP;STAMBP;STAMBP	NM_006463;NM_201647;NM_213622
1059	cg23682310	-0.360514	0.0461108	chr2
1076	cg24058732	2.5906	0.0445639	chr2
1094	cg24478779	-0.908369	0.0496017	chr2	LOC150622	NR_026832
1115	cg25074493	1.08888	0.0427954	chr2
1127	cg25446061	2.18542	0.0460429	chr2
1143	cg25804065	1.1746	0.0445639	chr2	NCK2;NCK2	NM_001004722;NM_003581
1154	cg26047334	-1.13342	0.0439416	chr2	TNS1	NM_022648
1167	cg26199631	-0.624034	0.0424548	chr2
1171	cg26271045	4.46015	0.0489914	chr2	LRRFIP1	NM_001137550
1224	cg27404023	0.607696	0.0440517	chr2
68	cg01159004	3.08127	0.0460429	chr20	B4GALT5	NM_004776
123	cg02587129	1.67625	0.0490826	chr20	CEP250	NM_007186
127	cg02634816	-2.47292	0.0370916	chr20	UBOX5;UBOX5;FASTKD5	NM_199415;NM_014948;NM_021826
254	cg04731988	-2.97342	0.0357562	chr20	OXT	NM_000915
266	cg04964333	1.57767	0.0335237	chr20	LPIN3;LPIN3	NM_022896;NM_022896
279	cg05205351	-1.83604	0.0357562	chr20	NOP56;SNORD110;NOP56;SNORA51	NM_006392;NR_003078;NR_027700;NR_002981
317	cg05926269	1.34431	0.0285322	chr20	GNAS;GNAS;GNAS;GNAS	NM_001077490;NM_016592;NR_003259;NM_080425
354	cg06661994	1.0858	0.0458297	chr20	C20orf195	NM_024059
406	cg07439609	-2.66432	0.0388807	chr20	PAK7;PAK7	NM_020341;NM_177990
528	cg10546626	-1.07339	0.0439416	chr20	GNASAS;GNAS	NR_002785;NM_016592
577	cg11853697	3.70749	0.0285322	chr20	CDH4	NM_001794
616	cg12919829	-0.801164	0.0428492	chr20	ProSAPiP1	NM_014731
626	cg13144966	-0.599602	0.0285322	chr20	C20orf27	NM_001039140
630	cg13209487	-0.668998	0.0370916	chr20	SRXN1	NM_080725
655	cg13544006	-0.586514	0.0410163	chr20	FER1L4	NR_024377
712	cg14660776	0.948807	0.0434281	chr20	GNASAS;GNAS	NR_002785;NM_016592
755	cg15494556	1.09992	0.0370916	chr20	ZBP1;ZBP1;ZBP1;ZBP1	NM_030776;NM_001160419;NM_001160417;NM_001160418
760	cg15680975	-0.572093	0.0285322	chr20	PANK2;PANK2;PANK2	NM_024960;NM_153640;NM_153638
846	cg17924366	-0.518276	0.0370916	chr20
951	cg20353496	0.624266	0.0467856	chr20	FAM110A;FAM110A;FAM110A	NM_031424;NM_207121;NM_001042353
962	cg20588982	-0.316026	0.0428492	chr20	PXMP4;PXMP4	NM_007238;NM_183397
985	cg21120539	0.357625	0.0370916	chr20	CTSZ;CTSZ	NM_001336;NM_001336
998	cg21686379	-0.911222	0.0443452	chr20	COL9A3	NM_001853
1034	cg23040554	-2.48181	0.0461108	chr20
1051	cg23448584	0.907684	0.0397721	chr20	CPXM1	NM_019609
1095	cg24493068	-0.958107	0.0496017	chr20	GHRH	NM_021081
1119	cg25147343	-2.05247	0.0467856	chr20	FRG1B	NR_003579
1177	cg26371206	0.721658	0.0370916	chr20	BFSP1;BFSP1	NM_001161705;NM_001195
1206	cg26955850	-2.56317	0.0439416	chr20	OXT	NM_000915
1219	cg27343325	-0.751175	0.0357562	chr20	ADAM33;ADAM33	NM_153202;NM_025220
62	cg01082437	-0.881363	0.0443452	chr21
267	cg04986276	-0.909786	0.0421854	chr21	TCP10L	NM_144659
466	cg09200260	2.27398	0.0389505	chr21
825	cg17499729	2.0287	0.0446334	chr21
1048	cg23422060	-0.783332	0.0490989	chr21	RSPH1	NM_080860
1111	cg24936695	-0.675862	0.0458297	chr21	CLDN17	NM_012131
72	cg01234420	-0.613053	0.0496017	chr22	LOC150381	NR_027034
121	cg02454750	-0.568318	0.0445639	chr22	A4GALT	NM_017436
129	cg02713951	-1.32537	0.0326098	chr22
159	cg03259733	-0.628752	0.0447549	chr22	C22orf39;C22orf39	NM_173793;NM_001166242
398	cg07311505	0.767297	0.0447801	chr22	CBX7	NM_175709
462	cg09072576	-1.01503	0.0447118	chr22	GNB1L;C22orf29	NM_053004;NM_024627
471	cg09282085	-1.00152	0.0370916	chr22	RPL3;RNU86;RPL3	NM_000967;NR_000026;NM_001033853
490	cg09861871	-0.733761	0.0461108	chr22	ARFGAP3;ARFGAP3	NM_014570;NM_001142293
491	cg09894136	-0.503261	0.0437913	chr22	MPPED1	NM_001044370
538	cg10799608	-0.623359	0.0458297	chr22	PNPLA3	NM_025225
549	cg11081833	-1.07385	0.0370916	chr22	LGALS2;LGALS2	NM_006498;NM_006498
743	cg15243570	1.8768	0.0458297	chr22	SCARF2;SCARF2	NM_153334;NM_182895
875	cg18666630	-1.71209	0.041337	chr22	CACNG2	NM_006078
906	cg19358731	-0.884923	0.0439416	chr22	CSNK1E;CSNK1E	NM_001894;NM_152221
923	cg19783536	-1.2508	0.0370916	chr22	ATP6V1E1;ATP6V1E1;ATP6V1E1;ATP6V1E1;ATP6V1E1;ATP6V1E1	NM_001039366;NM_001039367;NM_001039366;NM_001696;NM_001039367;NM_001696
994	cg21510025	-0.548552	0.04022	chr22	PIK3IP1;PIK3IP1	NM_001135911;NM_052880
1038	cg23141902	-1.22573	0.0285322	chr22	RPL3;SNORD83A;RPL3	NM_000967;NR_000027;NM_001033853
1045	cg23363526	1.00311	0.0443452	chr22	GGT1;GGT1;GGT1;GGT1	NM_001032364;NM_001032365;NM_013430;NM_005265
1186	cg26581200	-1.15119	0.0421706	chr22	LIF	NM_002309
20	cg00336149	-2.94578	0.0370916	chr3	CACNA1D;CACNA1D;CACNA1D	NM_001128839;NM_000720;NM_001128840
30	cg00475509	1.06293	0.0485081	chr3	ZIC1	NM_003412
37	cg00658740	-1.33629	0.0445639	chr3	NCK1	NM_006153
41	cg00744866	0.849829	0.0493338	chr3	CLASP2	NM_015097
47	cg00834590	0.340046	0.0439416	chr3
51	cg00871560	1.66083	0.0467856	chr3	TMEM108;TMEM108	NM_023943;NM_001136469
56	cg00968241	-0.665071	0.0439416	chr3	LEKR1	NM_001004316
69	cg01180628	-2.13395	0.0370916	chr3	BHLHE40	NM_003670
73	cg01277372	1.14052	0.0467856	chr3	MECOM	NM_004991
76	cg01357135	1.78862	0.0326098	chr3	PPM1L	NM_139245
79	cg01379656	-0.749191	0.0421706	chr3	NAALADL2	NM_207015
96	cg01999701	-1.00041	0.0489914	chr3
101	cg02079455	-0.787066	0.0398665	chr3	FBLN2;FBLN2;FBLN2	NM_001165035;NM_001998;NM_001004019
118	cg02399831	3.42568	0.0285322	chr3
136	cg02814858	-1.2755	0.0443452	chr3
138	cg02867145	-1.67794	0.0357562	chr3	RFT1	NM_052859
153	cg03152121	2.14215	0.0423356	chr3
197	cg03881214	0.646384	0.0494418	chr3	FXR1;FXR1;FXR1	NM_001013438;NM_001013439;NM_005087
207	cg04132452	1.63877	0.0326098	chr3	PPM1L	NM_139245
233	cg04431788	-2.23322	0.0445639	chr3	CCRL1;CCRL1;ACAD11	NM_178445;NM_016557;NM_032169
244	cg04508804	2.35637	0.0450116	chr3
245	cg04509882	-0.517284	0.0443452	chr3	EIF4G1;EIF4G1;EIF4G1;EIF4G1;EIF4G1;EIF4G1	NM_198241;NM_182917;NM_198242;NM_198244;NM_004953;NM_004953
271	cg05054898	-0.427559	0.0495068	chr3	LOC152217;NCBP2;NCBP2	NR_024388;NM_001042540;NM_007362
273	cg05106785	-0.64018	0.0486039	chr3	IL1RAP;IL1RAP;IL1RAP;IL1RAP;IL1RAP;IL1RAP	NM_001167930;NM_001167931;NM_134470;NM_001167928;NM_002182;NM_001167929
334	cg06266100	-0.553955	0.0489914	chr3	LMCD1	NM_014583
357	cg06721473	1.40684	0.0467856	chr3	HYAL2;HYAL2	NM_003773;NM_033158
360	cg06785429	-1.63182	0.0445639	chr3	DCUN1D1	NM_020640
435	cg08447525	0.524934	0.0446334	chr3	GPR149	NM_001038705
442	cg08546300	-0.6064	0.0485081	chr3
447	cg08690412	-1.05492	0.0467856	chr3	SRGAP3;SRGAP3	NM_001033117;NM_014850
449	cg08710432	-0.735537	0.0446334	chr3	PIGZ	NM_025163
454	cg08768852	1.46374	0.0357562	chr3
456	cg08802409	-0.895235	0.0285322	chr3	CISH;CISH	NM_145071;NM_013324
478	cg09591533	1.15211	0.0445639	chr3
479	cg09626867	-2.27748	0.0453363	chr3	EXOSC7	NR_023353
481	cg09671122	-0.614759	0.0434281	chr3	CMC1	NM_182523
535	cg10713320	-0.76301	0.0443994	chr3	CLDND1;CLDND1;CLDND1;CLDND1;CLDND1;CLDND1;CLDND1	NM_019895;NM_001040182;NM_001040200;NM_001040199;NM_001040183;NM_001040199;NM_001040181
537	cg10799327	-1.41547	0.0372949	chr3
554	cg11236795	-0.785994	0.0439416	chr3	MCF2L2	NM_015078
556	cg11338178	-0.610418	0.0493338	chr3
559	cg11384014	-0.56988	0.0476535	chr3	CLSTN2	NM_022131
589	cg12140665	-0.817748	0.0450116	chr3	C3orf70	NM_001025266
613	cg12847013	-2.34662	0.0483638	chr3	SCHIP1	NM_014575
625	cg13072940	-1.1325	0.0486982	chr3	MON1A;MON1A	NM_001142501;NM_032355
628	cg13185177	-1.26216	0.0357562	chr3	GP5	NM_004488
632	cg13284007	-0.641168	0.048053	chr3	DCP1A	NM_018403
635	cg13314965	-0.879959	0.0370916	chr3	TM4SF19	NM_138461
640	cg13411656	-0.877269	0.0434281	chr3	ZBTB38	NM_001080412
643	cg13425146	-0.799212	0.0370916	chr3
704	cg14574118	2.86941	0.0389505	chr3	SUCLG2	NM_003848
724	cg14870461	-1.23954	0.0428492	chr3	C3orf64	NM_173654
782	cg16225773	-1.54818	0.0469055	chr3
797	cg16588163	-1.77028	0.0410948	chr3	IL1RAP;IL1RAP;IL1RAP;IL1RAP;IL1RAP;IL1RAP	NM_001167929;NM_001167931;NM_001167930;NM_001167928;NM_134470;NM_002182
815	cg16971668	2.55433	0.0357562	chr3	EOMES	NM_005442
818	cg17065011	1.9247	0.0370916	chr3	SLCO2A1	NM_005630
852	cg18123677	-1.0903	0.0357562	chr3	SERPINI1;SERPINI1	NM_005025;NM_001122752
879	cg18720486	2.24692	0.0445639	chr3	SHQ1	NM_018130
922	cg19778455	-1.38027	0.0434281	chr3
942	cg20168412	-0.430914	0.0382964	chr3
949	cg20300093	-1.38823	0.0458297	chr3	ADCY5	NM_183357
995	cg21596238	2.98402	0.0326098	chr3	VGLL4;VGLL4	NM_014667;NM_001128219
1033	cg23024047	1.94557	0.0370916	chr3
1075	cg24046434	-0.461054	0.0493338	chr3
1091	cg24391989	-0.307602	0.0445639	chr3	OSBPL10	NM_017784
1099	cg24678732	-0.437452	0.0443452	chr3
1128	cg25461389	-0.976021	0.0427954	chr3
1131	cg25516803	2.48279	0.0357562	chr3	CCK	NM_000729
1141	cg25771026	1.40958	0.049359	chr3
1156	cg26062204	-0.306027	0.0447549	chr3	CLRN1;CLRN1;CLRN1	NM_052995;NM_052995;NM_174878
1161	cg26132647	1.50913	0.0410163	chr3
1185	cg26519339	-0.546839	0.0467856	chr3	TMEM39A	NM_018266
1190	cg26652484	2.86532	0.0357562	chr3	ARF4	NM_001660
1194	cg26714086	-0.553159	0.0493338	chr3
1215	cg27269492	-0.94043	0.0370916	chr3	SLC6A20;SLC6A20	NM_020208;NM_022405
1218	cg27328797	1.49742	0.0326098	chr3
1223	cg27394962	-0.450213	0.0447118	chr3	CGGBP1;CGGBP1	NM_003663;NM_001008390
7	cg00092309	1.42749	0.0490989	chr4
24	cg00392156	-0.717259	0.0447549	chr4	PDE6B;PDE6B;PDE6B	NM_001145292;NM_000283;NM_001145291
49	cg00863318	-0.943177	0.0346869	chr4
156	cg03202388	0.781769	0.0467856	chr4	PHF17;PHF17	NM_024900;NM_199320
182	cg03573788	-0.587342	0.0467856	chr4
196	cg03874137	-0.536942	0.0441859	chr4
232	cg04422150	0.611532	0.0471189	chr4
248	cg04606779	3.77088	0.0410948	chr4	C4orf49	NM_032623
343	cg06428211	0.44562	0.0447549	chr4
348	cg06500120	0.965944	0.0445639	chr4	GSX2	NM_133267
401	cg07324609	-1.09393	0.0486039	chr4
418	cg07934068	0.780082	0.0480937	chr4	ANTXR2	NM_058172
419	cg07939743	-0.682819	0.0437913	chr4
437	cg08462501	2.33645	0.0439416	chr4	TBC1D1	NM_015173
455	cg08774969	-0.429955	0.0444102	chr4	FGFRL1;FGFRL1;FGFRL1	NM_001004358;NM_021923;NM_001004356
469	cg09249657	-0.887736	0.0428492	chr4	RBM47;RBM47	NM_019027;NM_001098634
472	cg09290600	3.70492	0.0370916	chr4
473	cg09374173	-0.463605	0.0485081	chr4
530	cg10676327	4.05164	0.0490111	chr4
562	cg11470063	-0.528557	0.0421706	chr4
594	cg12383491	-0.661982	0.0428492	chr4	MND1	NM_032117
595	cg12389356	-0.369802	0.0467856	chr4	CPE	NM_001873
611	cg12827188	-0.666107	0.0434281	chr4	FGA;FGA	NM_000508;NM_021871
620	cg12986700	-2.3569	0.0467856	chr4	NPFFR2;NPFFR2;NPFFR2	NM_004885;NM_053036;NM_001144756
621	cg12998503	-0.784891	0.0467856	chr4	WWC2	NM_024949
744	cg15256972	-0.36604	0.0370916	chr4
781	cg16220124	0.907732	0.0464215	chr4	LOC285548	NR_015450
824	cg17455261	0.503109	0.0467856	chr4	AFF1	NM_001166693
854	cg18162059	-0.769555	0.0443452	chr4	STK32B	NM_018401
869	cg18511930	-0.381657	0.0370916	chr4
894	cg19133933	0.320499	0.0460429	chr4	ZAR1	NM_175619
917	cg19665882	-0.409462	0.0497705	chr4
975	cg20793532	-2.3614	0.0445639	chr4	PPP2R2C;PPP2R2C	NM_181876;NM_020416
1014	cg22461018	-0.901064	0.0443452	chr4	MORF4	NM_006792
1024	cg22778014	-0.650072	0.0357562	chr4	COL25A1;COL25A1	NM_198721;NM_032518
1057	cg23593694	-2.25108	0.0285322	chr4
1098	cg24547910	-1.84036	0.0357562	chr4
1117	cg25081128	1.93701	0.0491073	chr4	TSPAN5	NM_005723
1178	cg26385085	-1.42498	0.0285322	chr4	ZNF718;ZNF595	NM_001039127;NM_182524
1182	cg26448394	-2.1698	0.0450531	chr4
1199	cg26830958	-0.7288	0.0370916	chr4
1212	cg27206867	2.68825	0.0489914	chr4	WDR1;WDR1	NM_005112;NM_017491
17	cg00275479	4.21096	0.0357562	chr5
59	cg01038640	-0.79351	0.0467778	chr5	C5orf52	NM_001145132
75	cg01306614	-0.693408	0.0357562	chr5	TNPO1	NM_002270
102	cg02086801	2.09749	0.0370916	chr5	OTP	NM_032109
105	cg02135861	1.35466	0.0490701	chr5	IRX2;IRX2;C5orf38	NM_033267;NM_001134222;NM_178569
116	cg02379533	-1.29922	0.0490989	chr5	C5orf4	NM_032385
119	cg02402882	-0.952604	0.0434281	chr5
252	cg04730731	-0.701654	0.0446334	chr5	GEMIN5	NM_015465
307	cg05666607	-0.737717	0.0357562	chr5	POU4F3	NM_002700
316	cg05898591	0.534677	0.0467856	chr5
387	cg07233483	-1.44125	0.0370916	chr5	GALNT10;GALNT10	NM_017540;NM_198321
392	cg07287793	-0.976368	0.0331856	chr5	UBE2QL1	NM_001145161
403	cg07337385	-0.653101	0.0397422	chr5	MYOZ3;MYOZ3	NM_001122853;NM_133371
422	cg08029909	-0.537577	0.0421706	chr5	UNC5A	NM_133369
461	cg09059904	2.8523	0.0496017	chr5	F2R	NM_001992
542	cg10918580	-0.554963	0.0450116	chr5	RGNEF	NM_001080479
550	cg11097675	-1.33246	0.0397422	chr5
560	cg11427534	2.6449	0.0483638	chr5
567	cg11671363	0.559797	0.0445639	chr5	MIR145;LOC728264	NR_029686;NR_027180
569	cg11771002	-0.885516	0.0415727	chr5	MCC;MCC	NM_002387;NM_001085377
573	cg11814087	1.05384	0.0250231	chr5	ZFR	NM_016107
619	cg12985237	1.17587	0.0460429	chr5	POLS	NM_006999
636	cg13319042	-1.02683	0.0357562	chr5	SPARC	NM_003118
645	cg13453847	-1.08819	0.0458297	chr5	LOC340094	NR_026994
672	cg13940534	-0.713955	0.0485081	chr5	DIAPH1;DIAPH1	NM_001079812;NM_005219
700	cg14560022	0.293088	0.0496017	chr5
723	cg14861298	-1.89999	0.0439416	chr5	SDHA	NM_004168
757	cg15555712	-0.626352	0.0447549	chr5	SLC6A7	NM_014228
767	cg15962267	-1.08019	0.0423356	chr5	SNHG4;SNORA74A;MATR3	NR_003141;NR_002915;NM_199189
802	cg16698038	3.1459	0.0483638	chr5
832	cg17600233	-1.03799	0.0496017	chr5	IL3	NM_000588
851	cg18054674	2.99026	0.0428492	chr5	PCDHGA4;PCDHGA1;PCDHGA6;PCDHGA5;PCDHGB1;PCDHGA3;PCDHGA2;PCDHGA6;PCDHGB2;PCDHGB3	NM_018917;NM_018912;NM_032086;NM_018918;NM_018922;NM_018916;NM_018915;NM_018919;NM_018923;NM_018924
860	cg18402201	-0.667997	0.0439416	chr5	DHX29	NM_019030
862	cg18418051	1.29376	0.0389505	chr5	NPR3	NM_000908
882	cg18844163	-0.905367	0.0370916	chr5	ARHGAP26;ARHGAP26	NM_015071;NM_001135608
912	cg19552640	3.73022	0.0399515	chr5	MEGF10	NM_032446
956	cg20441048	-1.31085	0.0467856	chr5	UBE2QL1	NM_001145161
971	cg20708842	1.0109	0.0370916	chr5	FBN2	NM_001999
982	cg20959460	1.18434	0.0357562	chr5
1003	cg21817858	2.44017	0.04022	chr5
1009	cg22217158	1.30862	0.0439416	chr5
1036	cg23108125	-0.746614	0.0461108	chr5	PRR7	NM_030567
1042	cg23328208	-0.821114	0.0463823	chr5	RASGEF1C	NM_175062
1069	cg23943013	0.366078	0.0443452	chr5	SERINC5	NM_178276
1137	cg25625127	-0.967346	0.0421706	chr5
1162	cg26139975	-1.57198	0.0450531	chr5
1187	cg26584337	0.85587	0.0285322	chr5
1203	cg26918987	-1.28747	0.0480937	chr5
1217	cg27319536	-1.24195	0.0439416	chr5	PPP2R2B;PPP2R2B;PPP2R2B;PPP2R2B	NM_181674;NM_181677;NM_181678;NM_181676
1220	cg27346937	-2.20196	0.0447549	chr5	SDHA	NM_004168
21	cg00377681	-2.04713	0.0477772	chr6
25	cg00405078	-1.3469	0.0326098	chr6
48	cg00846554	-1.82704	0.0370916	chr6	PHACTR1	NM_030948
65	cg01114156	-0.676513	0.0458297	chr6	RWDD1;RWDD1;RWDD1	NM_016104;NM_001007464;NM_015952
80	cg01557332	-0.656794	0.0445639	chr6	THBS2	NM_003247
93	cg01950077	-0.938902	0.0285322	chr6
113	cg02282626	0.403908	0.0439416	chr6	HLA-L	NR_027822
130	cg02730990	-0.770007	0.0370916	chr6
131	cg02755956	-1.22027	0.0485081	chr6	FYN	NM_002037
147	cg02956962	-1.37183	0.0496017	chr6
151	cg03118206	-0.822222	0.0447549	chr6	KIAA1244	NM_020340
183	cg03605610	2.22658	0.0439416	chr6
211	cg04174651	-1.11169	0.0447549	chr6
217	cg04230050	-0.769793	0.0370916	chr6
218	cg04250991	1.01988	0.0440517	chr6
224	cg04355968	1.02684	0.0439416	chr6	HIST1H3I	NM_003533
255	cg04762129	-1.75947	0.0285322	chr6
264	cg04925261	-0.299101	0.0451706	chr6	OR2H2	NM_007160
280	cg05222986	2.14894	0.04022	chr6	RPS12;SNORD101	NM_001016;NR_002434
300	cg05463027	-2.22341	0.0485081	chr6	KIF13A;KIF13A;KIF13A;KIF13A	NM_001105567;NM_001105566;NM_001105568;NM_022113
326	cg06065608	-1.96659	0.0346869	chr6	PACRG;PACRG;PARK2;PACRG;PARK2;PARK2	NM_152410;NM_001080379;NM_004562;NM_001080378;NM_013987;NM_013988
330	cg06151074	-2.5267	0.0489914	chr6	BAT5	NM_021160
362	cg06851817	-1.88698	0.0467856	chr6
366	cg06885468	-0.796793	0.0397721	chr6
377	cg07130494	-0.671641	0.0389505	chr6	PTPRK;PTPRK	NM_002844;NM_001135648
391	cg07269000	-0.895497	0.0445639	chr6	UBD	NM_006398
399	cg07314680	0.988157	0.0397422	chr6	C6orf52;PAK1IP1;C6orf52;C6orf52	NR_026736;NM_017906;NM_001145020;NR_026737
407	cg07604025	1.18998	0.0496017	chr6	SNRPC;SNRPC	NM_003093;NR_029472
412	cg07721569	0.739792	0.0421854	chr6	TFAP2A	NM_001042425
460	cg09048334	1.68101	0.0489914	chr6
480	cg09657185	-1.29474	0.0491073	chr6	GRM4	NM_000841
484	cg09789650	-1.25252	0.0389505	chr6
487	cg09804616	-0.799175	0.0437481	chr6	KIAA1949;KIAA1949	NM_001134870;NM_133471
500	cg10102384	-1.59444	0.0483638	chr6	PACRG;PACRG;PARK2;PACRG;PARK2;PARK2	NM_152410;NM_001080379;NM_004562;NM_001080378;NM_013987;NM_013988
506	cg10221172	-0.984512	0.0410163	chr6	SASH1	NM_015278
519	cg10437217	3.38328	0.0428492	chr6
520	cg10446043	-1.45879	0.0410163	chr6	KCNK17;KCNK17	NM_031460;NM_001135111
583	cg11969053	-0.581616	0.0499764	chr6	TMEM63B	NM_018426
623	cg13010621	-0.620052	0.0410163	chr6
661	cg13660719	1.74263	0.0370916	chr6	DDR1;DDR1	NM_013993;NM_001954
703	cg14571710	-0.979681	0.0444102	chr6	KIAA1949;NRM;KIAA1949	NM_001134870;NM_007243;NM_133471
709	cg14635654	-0.480249	0.0471189	chr6	PBX2	NM_002586
715	cg14708905	-0.736899	0.0490989	chr6	TRIM40	NM_138700
750	cg15403198	1.48405	0.0443452	chr6
752	cg15415945	-0.529982	0.048053	chr6	C6orf47	NM_021184
763	cg15809217	-2.32931	0.0447118	chr6	BAT3;BAT3;BAT3;BAT3	NM_004639;NM_080702;NM_080703;NM_001098534
768	cg15985157	-0.943021	0.0285322	chr6
777	cg16166826	-0.87532	0.0370916	chr6	HCG26	NR_002812
779	cg16203801	0.81994	0.0335237	chr6	LOC285830;LOC285830	NR_026972;NR_026973
817	cg17034390	3.00739	0.0357562	chr6
828	cg17553286	1.26092	0.0458297	chr6	VIP;VIP;VIP;VIP	NM_003381;NM_194435;NM_194435;NM_003381
830	cg17567838	-1.49998	0.0496238	chr6	SLC39A7;RXRB;SLC39A7	NM_006979;NM_021976;NM_001077516
836	cg17633074	-1.13024	0.0496238	chr6	GTF2H4	NM_001517
863	cg18419271	2.63224	0.04022	chr6
895	cg19154116	-1.58172	0.0476535	chr6	CYP21A2;CYP21A2	NM_001128590;NM_000500
899	cg19186136	0.995735	0.0370916	chr6
960	cg20543183	-1.34299	0.0370916	chr6	LY6G5C	NM_025262
964	cg20605134	-1.77631	0.0443452	chr6	JARID2	NM_004973
989	cg21240420	-1.20814	0.0483638	chr6	COL11A2;COL11A2;COL11A2	NM_080679;NM_080681;NM_080680
1005	cg21875532	0.935433	0.0285322	chr6	C6orf132	NM_001164446
1011	cg22283528	-0.881851	0.0492297	chr6	STK19;DOM3Z	NR_026717;NM_005510
1017	cg22505205	3.02701	0.0250231	chr6	BMP6	NM_001718
1040	cg23157089	-0.495818	0.049359	chr6	NT5E	NM_002526
1056	cg23585168	-1.5812	0.0436634	chr6	NOTCH4	NM_004557
1068	cg23926793	0.688128	0.0443452	chr6	KHDRBS2	NM_152688
1073	cg23989119	-0.806428	0.0478967	chr6
1078	cg24125828	3.68977	0.0485081	chr6	PRRT1	NM_030651
1093	cg24451117	-0.867831	0.0443452	chr6	MAP3K5	NM_005923
1114	cg25045942	1.76253	0.0486039	chr6	HLA-DPB1	NM_002121
1140	cg25729445	1.00519	0.0447549	chr6	GABBR1;GABBR1;GABBR1	NM_021904;NM_021903;NM_001470
1146	cg25840433	-1.1273	0.0496017	chr6	RPS6KA2	NM_001006932
1174	cg26325867	-1.73502	0.0467856	chr6
1197	cg26745551	-0.604891	0.0357562	chr6	GPR63;GPR63;GPR63;GPR63	NM_001143957;NM_030784;NM_030784;NM_001143957
1200	cg26890706	4.56567	0.0357562	chr6	RNF182;RNF182;RNF182;RNF182	NM_001165033;NM_152737;NM_001165034;NM_001165032
1202	cg26918792	0.662782	0.0489914	chr6	BTN3A1;BTN3A1;BTN3A1;BTN3A1	NM_001145008;NM_194441;NM_001145009;NM_007048
1205	cg26945780	-0.709961	0.0370916	chr6	SRPK1	NM_003137
1209	cg27097018	-0.590363	0.0445639	chr6	F13A1	NM_000129
1213	cg27222736	2.98083	0.0489914	chr6
29	cg00469897	-1.88266	0.0370916	chr7
31	cg00479718	-0.291944	0.0424548	chr7	PRKAR1B;PRKAR1B;PRKAR1B;PRKAR1B;PRKAR1B;PRKAR1B	NM_001164759;NM_001164762;NM_001164758;NM_001164760;NM_001164761;NM_002735
34	cg00533407	-1.19635	0.0479338	chr7	ACCN3;ACCN3;ACCN3	NM_020322;NM_020321;NM_004769
35	cg00616000	-0.904331	0.049359	chr7	KDELR2;KDELR2	NM_001100603;NM_006854
66	cg01116873	-0.415464	0.0445639	chr7
70	cg01196858	-0.785071	0.0434281	chr7	SCRN1;SCRN1;SCRN1;SCRN1	NM_014766;NM_001145514;NM_001145513;NM_001145515
87	cg01824316	1.28455	0.0408938	chr7	PMS2L3	NR_028059
117	cg02389949	-2.00494	0.0285322	chr7	C7orf41	NM_152793
120	cg02445395	-0.726295	0.0490989	chr7	PTPRN2;PTPRN2;PTPRN2	NM_002847;NM_130842;NM_130843
187	cg03664589	-0.52996	0.0444102	chr7	TMEM184A	NM_001097620
189	cg03699958	-2.08957	0.0370916	chr7	GTF2IRD1;GTF2IRD1	NM_016328;NM_005685
199	cg03952885	1.08851	0.0437913	chr7
219	cg04263702	0.844578	0.0467856	chr7	FBXL18	NM_024963
295	cg05415549	-2.24603	0.0464255	chr7
311	cg05794813	-1.18434	0.0454944	chr7	C7orf50;C7orf50;C7orf50	NM_001134395;NM_032350;NM_001134396
333	cg06219267	0.382104	0.0370916	chr7	FBXO24;LRCH4;FBXO24	NM_033506;NM_002319;NM_033506
350	cg06553841	0.970048	0.0389505	chr7	C7orf58;C7orf58	NM_001105533;NM_024913
355	cg06694239	-0.906836	0.0338758	chr7	TSPAN33	NM_178562
358	cg06746009	-0.849566	0.0472635	chr7	CUX1;CUX1	NM_181500;NM_001913
361	cg06808571	3.05544	0.0447549	chr7	KCNH2;KCNH2	NM_172057;NM_000238
368	cg06913160	-0.994229	0.0370916	chr7	GATAD1	NM_021167
431	cg08241694	-0.781595	0.0488514	chr7	DDC	NM_001082971
458	cg08935195	-0.386187	0.0439416	chr7
494	cg09998597	-0.671798	0.0467856	chr7
532	cg10683615	1.5368	0.0410163	chr7	INMT	NM_006774
557	cg11343713	-1.37342	0.0447549	chr7	ADCY1	NM_021116
558	cg11346962	1.18369	0.0443452	chr7	FLJ45340	NR_024368
585	cg12024236	0.718346	0.0495068	chr7	GTF2I;GTF2I;GTF2I;GTF2I;GTF2I	NM_032999;NM_033001;NM_001518;NM_001163636;NM_033000
590	cg12253191	-0.980882	0.048302	chr7
593	cg12355813	0.515552	0.0346869	chr7	NRCAM;NRCAM;NRCAM	NM_001037133;NM_001037132;NM_005010
599	cg12469001	-1.83149	0.0467856	chr7
600	cg12492157	-1.38187	0.0494418	chr7
602	cg12513221	-2.27903	0.0439416	chr7	ACCN3;ACCN3;ABCB8;ACCN3	NM_020322;NM_020321;NM_007188;NM_004769
608	cg12789343	-0.778426	0.0437913	chr7
615	cg12918081	-1.46233	0.0357562	chr7	LHFPL3	NM_199000
649	cg13487037	1.89757	0.0443452	chr7	SRI;SRI	NM_003130;NM_198901
665	cg13733410	-0.770881	0.0439416	chr7	VWDE;VWDE	NM_001135924;NM_001135924
677	cg14042780	-0.622193	0.0437913	chr7
734	cg15027630	2.34075	0.0437913	chr7	SRRM3	NM_001110199
735	cg15089950	-1.99354	0.0458297	chr7	STEAP1	NM_012449
811	cg16908830	-0.832926	0.0450116	chr7	ZNRF2	NM_147128
833	cg17610800	2.02187	0.0427954	chr7	EVX1	NM_001989
857	cg18291014	-1.25205	0.0467856	chr7
859	cg18371428	-0.859762	0.0485081	chr7	PTPRN2;PTPRN2;PTPRN2	NM_002847;NM_130842;NM_130843
866	cg18446336	-2.7427	0.0445639	chr7	GNA12	NM_007353
867	cg18463876	-0.729091	0.0285322	chr7	SRRM3	NM_001110199
916	cg19661819	1.74377	0.0458297	chr7	NUB1	NM_016118
944	cg20181323	-0.796451	0.0489914	chr7	PTPRN2;PTPRN2;PTPRN2	NM_002847;NM_130842;NM_130843
955	cg20426729	-1.34748	0.0490989	chr7
966	cg20659752	1.87598	0.0285322	chr7
977	cg20845858	-0.616873	0.0450116	chr7	CPA4;CPA4	NM_016352;NM_001163446
1000	cg21728101	-3.29023	0.0439416	chr7	MAD1L1;MAD1L1;MAD1L1	NM_003550;NM_001013837;NM_001013836
1018	cg22519356	-0.301001	0.0439416	chr7	SRRM3	NM_001110199
1049	cg23432249	-1.24791	0.0443452	chr7
1052	cg23468130	-1.49348	0.0428492	chr7	MDFIC;MDFIC;MDFIC	NM_001166345;NM_001166346;NM_199072
1105	cg24757553	-1.03623	0.0447118	chr7
1112	cg24979288	2.94616	0.0460429	chr7
1235	ch.7.140705775R	0.575561	0.0285322	chr7
1236	ch.7.1839793F	2.72602	0.0496017	chr7
2	cg00010266	-0.507351	0.0377764	chr8	MFSD3	NM_138431
12	cg00174421	1.81845	0.0496017	chr8	PNMA2	NM_007257
77	cg01359236	-0.558272	0.0397721	chr8
99	cg02049217	-0.434723	0.0370916	chr8	DLC1;DLC1	NM_182643;NM_024767
162	cg03280108	1.01347	0.0370916	chr8
185	cg03657589	-0.471405	0.0490989	chr8	KIAA1688	NM_025251
237	cg04451175	3.42928	0.0428492	chr8	FGF20	NM_019851
242	cg04500377	-0.596026	0.0410948	chr8	DDHD2;DDHD2;DDHD2	NM_001164232;NM_015214;NM_001164234
313	cg05850205	-1.20293	0.046328	chr8	ADHFE1	NM_144650
367	cg06899970	0.618623	0.0467856	chr8	DKK4;DKK4	NM_014420;NM_014420
370	cg06971659	-1.35384	0.048302	chr8	C8orf80	NM_001010906
372	cg07015195	1.34853	0.0488962	chr8	RSPO2	NM_178565
374	cg07068655	-1.33744	0.0401944	chr8	LOC340357	NR_015383
386	cg07230991	-0.54964	0.0439416	chr8
388	cg07243202	-1.67336	0.0461108	chr8
394	cg07296597	-0.517972	0.0467856	chr8
444	cg08599249	-0.887951	0.0410163	chr8
450	cg08715431	1.62681	0.0443452	chr8	SNORD54;RPS20;RPS20	NR_002437;NM_001023;NM_001146227
492	cg09941713	1.24555	0.0467856	chr8	CHD7	NM_017780
505	cg10194829	2.22948	0.0423147	chr8	FGF17	NM_003867
507	cg10231902	-0.868118	0.0475999	chr8	COL22A1	NM_152888
512	cg10303487	0.463462	0.0357562	chr8	DPYS	NM_001385
551	cg11125037	-0.462595	0.0496017	chr8
565	cg11633264	-1.51877	0.0370916	chr8
639	cg13406339	-0.891151	0.0447549	chr8
662	cg13681962	-0.944653	0.0484106	chr8
701	cg14563732	-0.82259	0.0483638	chr8	TSNARE1	NM_145003
730	cg14968300	2.28732	0.0443452	chr8
742	cg15241236	-1.50586	0.0346869	chr8	C8orf34	NM_052958
746	cg15302296	-0.683603	0.0370916	chr8	TNFRSF10C	NM_003841
805	cg16747999	-0.596395	0.0494418	chr8	ESRP1;ESRP1;ESRP1;ESRP1;ESRP1	NM_001122826;NM_001122825;NM_001034915;NM_001122827;NM_017697
878	cg18718844	1.80596	0.0370916	chr8	ESCO2	NM_001017420
893	cg19101547	-0.87628	0.0493338	chr8	RIMS2;RIMS2	NM_014677;NM_001100117
900	cg19188612	0.732146	0.044857	chr8	CTHRC1	NM_138455
921	cg19776515	0.815129	0.0462697	chr8	SDR16C5	NM_138969
976	cg20823772	0.503411	0.0450531	chr8	OSR2;OSR2	NM_001142462;NM_053001
986	cg21138131	-0.487566	0.0490989	chr8	RP1L1	NM_178857
1027	cg22917314	-0.482573	0.0448932	chr8
1028	cg22925006	0.462882	0.0467856	chr8	ATP6V1C1	NM_001695
1043	cg23346544	-1.34656	0.0486039	chr8
1054	cg23485807	1.15826	0.0467856	chr8	SLC25A37	NM_016612
1070	cg23973429	0.947094	0.0388807	chr8	GRHL2;GRHL2	NM_024915;NM_024915
1120	cg25183890	-0.798449	0.0397721	chr8	PDP1;PDP1;PDP1;PDP1;PDP1;PDP1;PDP1;PDP1	NM_001161780;NM_001161780;NM_018444;NM_001161778;NM_001161781;NM_018444;NM_001161779;NM_001161779
1129	cg25500285	0.944376	0.04022	chr8	EIF4EBP1	NM_004095
1150	cg25989783	-0.681034	0.0370916	chr8	NCALD;NCALD;NCALD;NCALD;NCALD;NCALD;NCALD;NCALD	NM_001040625;NM_001040630;NM_001040626;NM_032041;NM_001040628;NM_001040624;NM_001040629;NM_001040627
1201	cg26902216	0.558057	0.0370916	chr8	MAL2	NM_052886
1207	cg27001893	-0.710352	0.0370916	chr8	POLR3D	NM_001722
1208	cg27039662	1.07831	0.0357562	chr8
1227	cg27515671	-0.399198	0.0440517	chr8
1231	cg27648556	-0.590504	0.0410163	chr8
1237	ch.8.24555156R	1.7503	0.0488514	chr8
294	cg05385163	0.525125	0.0443452	chr9	BARX1	NM_021570
302	cg05492714	-1.07376	0.0480937	chr9	GRIN1;GRIN1;GRIN1	NM_000832;NM_007327;NM_021569
457	cg08855953	-0.918558	0.0496017	chr9	PRKACG	NM_002732
651	cg13497926	1.43741	0.0490509	chr9	WNK2	NM_006648
658	cg13632816	0.61702	0.0370916	chr9	SVEP1;SVEP1	NM_153366;NM_153366
668	cg13856126	-0.44408	0.0388807	chr9	RALGPS1;ANGPTL2	NM_014636;NM_012098
673	cg13947334	-1.00061	0.0421706	chr9	C9orf27	NR_024032
676	cg14016177	2.78199	0.0458297	chr9
689	cg14220634	-1.09504	0.0443452	chr9	ZNF169	NM_194320
690	cg14223709	-0.599093	0.0357562	chr9
692	cg14293898	3.27145	0.0451706	chr9	EXOSC3;EXOSC3	NM_001002269;NM_016042
694	cg14440947	-0.489658	0.0460429	chr9	B4GALT1	NM_001497
696	cg14485901	-1.03216	0.0421706	chr9	ABCA2;ABCA2	NM_001606;NM_212533
697	cg14493920	0.68228	0.0357562	chr9
710	cg14646983	-1.6578	0.0443452	chr9
711	cg14655242	-1.23956	0.0447549	chr9
1132	cg25530169	-0.771194	0.0445639	chr9	SPIN1	NM_006717
1168	cg26246296	-0.362523	0.0388807	chr9	TXN	NM_003329
1238	ch.9.1568505F	0.885811	0.0370916	chr9
1	cg00005617	-1.20195	0.0370916	chrX	EFNB1	NM_004429
3	cg00016934	2.08177	0.0490111	chrX	BCOR;BCOR	NM_001123384;NM_001123383
4	cg00032666	-1.1622	0.0475017	chrX	MAMLD1	NM_005491
13	cg00188409	0.913772	0.0450116	chrX
15	cg00231549	0.665022	0.0417248	chrX
23	cg00382651	2.11232	0.0428492	chrX	MORF4L2;MORF4L2;MORF4L2;MORF4L2;MORF4L2;MORF4L2;MORF4L2;MORF4L2;MORF4L2;MORF4L2;MORF4L2;MORF4L2;MORF4L2;MORF4L2;MORF4L2;MORF4L2	NM_001142423;NM_001142427;NM_001142429;NM_001142419;NM_001142432;NM_012286;NM_001142421;NM_001142422;NM_001142426;NM_001142430;NM_001142418;NM_001142425;NM_001142420;NM_001142428;NM_001142431;NM_001142424
40	cg00725912	2.01459	0.0460429	chrX	PRPS2;PRPS2	NM_002765;NM_001039091
45	cg00824273	-0.718227	0.0370916	chrX	VENTXP1	NR_001559
52	cg00877056	2.28122	0.0410948	chrX	MID2;MID2	NM_052817;NM_012216
84	cg01786967	2.36969	0.049359	chrX	TAF7L;TAF7L	NM_024885;NM_001168474
89	cg01886630	4.03276	0.0467856	chrX	REPS2;REPS2	NM_004726;NM_001080975
95	cg01997410	3.10992	0.0447549	chrX	NHSL2;RGAG4	NM_001013627;NM_001024455
97	cg02022247	1.98293	0.0410163	chrX	ARX	NM_139058
100	cg02060618	-2.09882	0.0370916	chrX	BMP15	NM_005448
111	cg02225164	2.6654	0.0370916	chrX	GAB3;GAB3	NM_080612;NM_001081573
126	cg02629737	3.94473	0.0357562	chrX	FGF13;FGF13;FGF13	NM_001139501;NM_001139500;NM_001139498
134	cg02799972	1.49414	0.0473169	chrX
148	cg03039483	0.861288	0.0453459	chrX	HDX	NM_144657
149	cg03040210	1.96502	0.0467856	chrX	MBNL3	NM_001170704
160	cg03267527	3.58205	0.0496017	chrX	TCEAL8;TCEAL8	NM_153333;NM_001006684
164	cg03305185	1.47158	0.0434281	chrX	ZNF75D	NM_007131
168	cg03357510	-1.06128	0.0445639	chrX
184	cg03605858	-1.20898	0.0496017	chrX	CXorf67	NM_203407
186	cg03659012	1.92972	0.0445639	chrX	ATP7A	NM_000052
191	cg03811055	1.06987	0.0370916	chrX	RBBP7;RBBP7	NM_002893;NM_002893
192	cg03832506	-0.453578	0.0439416	chrX	IQSEC2;IQSEC2	NM_015075;NM_001111125
202	cg04044694	1.32578	0.0370916	chrX	HNRNPH2;HNRNPH2;GLA;GLA	NM_019597;NM_001032393;NM_000169;NM_000169
212	cg04189723	3.3038	0.0489914	chrX	ZXDB;ZXDB	NM_007157;NM_007157
221	cg04310247	0.501835	0.0467856	chrX	CXorf56;CXorf56;CXorf56;CXorf56;CXorf56;CXorf56	NM_001170570;NM_001170570;NM_001170569;NM_022101;NM_001170569;NM_022101
227	cg04392209	1.02436	0.0447801	chrX
228	cg04395332	1.60483	0.0458297	chrX	ZNF673;ZNF673;ZNF673;ZNF673	NM_001129898;NM_001129900;NM_001129899;NM_017776
229	cg04397441	1.68575	0.0490701	chrX	OGT;OGT;OGT;BCYRN1;OGT	NM_181672;NM_181673;NM_181672;NR_001568;NM_181673
230	cg04399994	3.53671	0.0485081	chrX	PAK3;PAK3;PAK3	NM_001128166;NM_001128167;NM_002578
240	cg04486022	2.62255	0.0370916	chrX	FLJ30058	NM_144967
241	cg04492048	3.65992	0.0479338	chrX	ERAS	NM_181532
243	cg04501372	3.24923	0.0427954	chrX	SCML1;SCML1;SCML1;SCML1	NM_001037540;NM_001037536;NM_001037535;NM_006746
258	cg04817724	2.61474	0.0490701	chrX	IL1RAPL2	NM_017416
270	cg05052243	-0.831668	0.0285322	chrX	SAGE1	NM_018666
272	cg05078558	-0.694218	0.0486982	chrX
278	cg05185504	3.33673	0.0439416	chrX	FAM70A;FAM70A;FAM70A	NM_017938;NM_001104544;NM_001104545
282	cg05239824	0.489799	0.0453459	chrX	NKAP	NM_024528
286	cg05294909	3.98338	0.0427954	chrX	SCML1;SCML1;SCML1;SCML1	NM_001037540;NM_001037536;NM_001037535;NM_006746
297	cg05418506	2.62753	0.04726	chrX	NDUFB11;RBM10;NDUFB11;RBM10;NDUFB11;NDUFB11	NR_024234;NM_152856;NR_024235;NM_005676;NM_001135998;NM_019056
298	cg05444994	2.19264	0.0443452	chrX	CNKSR2;CNKSR2;CNKSR2;CNKSR2	NM_001168647;NM_001168649;NM_014927;NM_001168648
305	cg05559881	1.917	0.0460429	chrX	ZIC3	NM_003413
314	cg05887304	3.04666	0.0447118	chrX	PRPS2;PRPS2;PRPS2;PRPS2	NM_002765;NM_001039091;NM_002765;NM_001039091
315	cg05892376	3.1993	0.0434281	chrX	ARHGEF6	NM_004840
318	cg05929865	-1.3089	0.0437481	chrX	TEX11;TEX11	NM_001003811;NM_031276
324	cg05975021	-0.589567	0.0467856	chrX	ARHGAP6;AMELX;AMELX;AMELX;ARHGAP6	NM_013427;NM_001142;NM_182681;NM_182680;NM_006125
327	cg06068202	3.00687	0.0452132	chrX
329	cg06149454	1.33161	0.0335237	chrX
331	cg06170215	1.30224	0.0447549	chrX	CITED1;CITED1;CITED1;CITED1	NM_001144886;NM_004143;NM_001144885;NM_001144887
335	cg06300107	-2.50146	0.0447549	chrX	MTMR8	NM_017677
336	cg06307153	2.19255	0.0430209	chrX	ZNF75D	NM_007131
359	cg06746903	2.34342	0.0467856	chrX	MIR1256	NR_031657
381	cg07177300	0.569912	0.0437913	chrX	FRMPD4	NM_014728
384	cg07204290	1.75061	0.0370916	chrX	RLIM;RLIM	NM_016120;NM_183353
393	cg07295246	1.98252	0.0451706	chrX	SH3KBP1	NM_031892
397	cg07309821	1.55614	0.0467856	chrX	SPIN4	NM_001012968
400	cg07314984	0.996607	0.0370916	chrX	PHKA2	NM_000292
404	cg07354666	1.55273	0.0450116	chrX	EBP	NM_006579
409	cg07646007	2.22227	0.049359	chrX	FAM104B;FAM104B;FAM104B	NR_030722;NM_001166699;NM_138362
413	cg07796014	3.36124	0.0299345	chrX	HCCS;HCCS	NM_005333;NM_001122608
415	cg07874284	2.60691	0.0417363	chrX	PRPS2;PRPS2	NM_002765;NM_001039091
416	cg07897414	0.850562	0.0444102	chrX	KLHL4;KLHL4;KLHL4;KLHL4	NM_019117;NM_057162;NM_019117;NM_057162
426	cg08130682	2.21506	0.0465457	chrX	STAG2	NM_001042749
433	cg08401365	-1.48437	0.0485081	chrX	IRAK1;IRAK1;IRAK1	NM_001025242;NM_001569;NM_001025243
436	cg08460331	1.57203	0.0486503	chrX	ARMCX4	NR_028407
439	cg08480367	4.28335	0.0428492	chrX	SRPX;SRPX;SRPX;SRPX	NM_001170752;NM_006307;NM_001170751;NM_001170750
445	cg08610278	1.83674	0.0370916	chrX	APLN	NM_017413
446	cg08642787	1.47434	0.0488202	chrX	RPS6KA6	NM_014496
453	cg08760398	2.99321	0.0335237	chrX	FAM70A;FAM70A;FAM70A	NM_017938;NM_001104544;NM_001104545
468	cg09209584	-0.814009	0.0483638	chrX	FHL1;FHL1;FHL1;FHL1;FHL1;FHL1;FHL1;FHL1;FHL1	NM_001167819;NM_001159700;NR_027621;NM_001159701;NM_001159703;NM_001159702;NM_001159699;NM_001159704;NM_001449
488	cg09815545	2.57086	0.0448932	chrX	LOC92249	NR_015353
496	cg10060499	-0.282349	0.0467856	chrX
497	cg10076009	1.32171	0.0285322	chrX	SMARCA1;SMARCA1	NM_139035;NM_003069
499	cg10090585	1.1532	0.0424548	chrX	ENOX2;ENOX2	NM_182314;NM_006375
517	cg10423328	-0.807296	0.0443452	chrX	SATL1;SATL1	NM_001012980;NM_001163541
518	cg10425032	2.09485	0.0447549	chrX	CUL4B;CUL4B	NM_003588;NM_001079872
523	cg10501443	0.945162	0.0410948	chrX	LRCH2	NM_020871
527	cg10530128	2.44199	0.0496017	chrX	SLC35A2;SLC35A2;SLC35A2	NM_001032289;NM_001042498;NM_005660
546	cg10997274	-0.392053	0.0467856	chrX	HTR2C;MIR1911	NM_000868;NR_031732
547	cg11036643	4.07873	0.0479338	chrX	UPRT;UPRT	NR_030774;NM_145052
553	cg11236246	1.15659	0.0357562	chrX	POU3F4	NM_000307
572	cg11810837	1.22568	0.0446334	chrX	ARMCX5;ARMCX5;ARMCX5;ARMCX5;ARMCX5;ARMCX5	NM_001168485;NM_022838;NM_001168478;NM_001168479;NM_001168480;NM_001168482
575	cg11849673	-1.80341	0.0490701	chrX	CXorf36;CXorf36	NM_176819;NM_024689
578	cg11859478	2.13169	0.0443452	chrX	TAF9B	NM_015975
579	cg11864566	2.3496	0.0447701	chrX
592	cg12324831	3.74592	0.0443452	chrX	VBP1	NM_003372
610	cg12823249	2.80458	0.0357562	chrX	NCRNA00086	NR_024359
629	cg13204375	1.00153	0.0402725	chrX	TSR2	NM_058163
634	cg13310805	1.81714	0.0410948	chrX	CXorf22;CXorf22	NM_152632;NM_152632
644	cg13441872	2.13886	0.0357562	chrX	GNL3L	NM_019067
652	cg13506244	-0.79986	0.0389505	chrX	LOC92249	NR_015353
659	cg13643725	-0.747179	0.0489914	chrX	PPP1R3F	NM_033215
671	cg13933773	2.91862	0.041727	chrX	MIR1256;TMSB15B	NR_031657;NM_194324
685	cg14168975	-0.359483	0.0467856	chrX	ALAS2;ALAS2;ALAS2	NM_001037967;NM_000032;NM_001037968
708	cg14604474	3.72609	0.0496017	chrX	PHF6;PHF6;PHF6	NM_032335;NM_001015877;NM_032458
716	cg14725392	1.57953	0.0447549	chrX	PCDH19;PCDH19	NM_020766;NM_001105243
729	cg14964387	1.65946	0.0410948	chrX	WDR45	NM_007075
738	cg15133344	1.99091	0.0490509	chrX	BCOR;BCOR	NM_001123384;NM_001123383
747	cg15336560	1.66036	0.0403574	chrX	HDX	NM_144657
754	cg15481221	2.55859	0.0491073	chrX	HNRNPH2;HNRNPH2;GLA	NM_019597;NM_001032393;NM_000169
761	cg15682807	1.76376	0.0489914	chrX	ITM2A;ITM2A	NM_004867;NM_001171581
762	cg15796459	-1.10665	0.0434281	chrX	SHROOM2	NM_001649
764	cg15813836	2.16025	0.0370916	chrX	GPR64;GPR64;GPR64;GPR64	NM_005756;NM_001079859;NM_001079860;NM_001079858
773	cg16084857	1.95715	0.0490509	chrX	FLJ30058	NM_144967
774	cg16107992	2.37333	0.0460118	chrX	HDX	NM_144657
780	cg16207593	-1.79725	0.048117	chrX	MCART6;ZCCHC18;ZCCHC18	NM_001012755;NR_026694;NM_001143978
791	cg16522370	0.487764	0.0445639	chrX	TGIF2LX	NM_138960
796	cg16576300	-1.13677	0.04726	chrX	ZC4H2	NM_018684
798	cg16613750	2.14509	0.0440517	chrX	MSN;MSN	NM_002444;NM_002444
814	cg16968020	-2.06193	0.0445639	chrX	GABRA3	NM_000808
816	cg17017670	4.27324	0.0370916	chrX
820	cg17189778	2.7142	0.0485081	chrX	AVPR2;AVPR2;AVPR2	NM_000054;NM_001146151;NR_027419
821	cg17231524	1.71445	0.0370916	chrX	NCRNA00086	NR_024359
823	cg17391107	2.44103	0.0479338	chrX	EBP	NM_006579
826	cg17531456	1.02299	0.0357562	chrX	LOC644538	NM_001163438
827	cg17548969	4.98319	0.0479425	chrX	PIGA;PIGA	NM_002641;NM_020473
831	cg17588373	2.0186	0.0490111	chrX	GPM6B	NM_001001994
835	cg17627526	1.37752	0.0397422	chrX	PCYT1B;PCYT1B;PCYT1B	NM_004845;NM_001163264;NM_001163265
837	cg17654284	-1.23935	0.0439416	chrX
843	cg17853057	3.81154	0.0447549	chrX	PHF8;PHF8	NM_015107;NM_015107
864	cg18432711	1.78436	0.0439416	chrX	RBMX;RBMX;RBMX;RBMX;SNORD61	NM_001164803;NR_028477;NM_002139;NR_028476;NR_002735
870	cg18524099	-2.43583	0.0357562	chrX	ARHGAP6;ARHGAP6	NM_013427;NM_006125
876	cg18700197	-0.678686	0.0439416	chrX	ZC3H12B	NM_001010888
877	cg18700741	1.96277	0.0467856	chrX	RLIM;RLIM	NM_183353;NM_016120
881	cg18811184	-0.501126	0.0489914	chrX	PPEF1;PPEF1;PPEF1	NM_152226;NM_152224;NM_006240
889	cg18999476	-0.938859	0.0485081	chrX
909	cg19431247	2.90639	0.048302	chrX
911	cg19506407	-1.41032	0.0456189	chrX	NLGN4X;NLGN4X	NM_181332;NM_020742
913	cg19570406	-2.25864	0.0467856	chrX	ZFP92	NM_001136273
914	cg19618505	-0.937256	0.0439416	chrX
915	cg19629755	2.00451	0.0370916	chrX	IGBP1	NM_001551
929	cg19888047	1.50341	0.0445639	chrX	CHM;CHM	NM_001145414;NM_000390
930	cg19994834	1.86392	0.0467856	chrX	GRIA3;GRIA3	NM_007325;NM_000828
931	cg19997062	1.25375	0.0410163	chrX	SLITRK2;SLITRK2;SLITRK2;SLITRK2	NM_032539;NM_001144003;NM_001144005;NM_001144004
932	cg20017658	-1.45595	0.0485081	chrX	POF1B	NM_024921
948	cg20279479	2.14545	0.0496017	chrX	SLC6A8;SLC6A8;SLC6A8;SLC6A8;SLC6A8	NM_005629;NM_001142805;NM_001142805;NM_001142806;NM_005629
957	cg20463407	1.3082	0.0444102	chrX	ARMCX5;ARMCX5;ARMCX5;ARMCX5;ARMCX5;ARMCX5;ARMCX5;ARMCX5;ARMCX5	NM_001168485;NM_001168482;NM_022838;NM_001168478;NM_001168479;NM_001168482;NM_001168478;NM_001168480;NM_022838
958	cg20469935	0.783934	0.042405	chrX	LOC286467	NR_026975
959	cg20497504	2.942	0.0285322	chrX	TMEM35	NM_021637
961	cg20557017	3.01762	0.048302	chrX	CITED1;CITED1	NM_001144886;NM_004143
963	cg20593767	-0.558447	0.0434281	chrX	ARMCX1	NM_016608
974	cg20780998	1.85254	0.04022	chrX
981	cg20952364	-2.07765	0.0285322	chrX
988	cg21195120	0.935167	0.0434281	chrX	MBTPS2	NM_015884
990	cg21267792	1.82396	0.0475017	chrX	PIM2	NM_006875
992	cg21294096	-0.699917	0.0496238	chrX	AMMECR1	NM_001171689
999	cg21693321	2.85954	0.0397721	chrX	MED12	NM_005120
1007	cg22040303	-1.20152	0.048238	chrX	CNGA2	NM_005140
1013	cg22455963	-0.767652	0.0434281	chrX	HS6ST2;HS6ST2	NM_001077188;NM_147175
1025	cg22873668	2.29927	0.0357562	chrX	CXorf56;CXorf56;CXorf56;CXorf56;CXorf56;CXorf56	NM_001170570;NM_001170570;NM_001170569;NM_022101;NM_001170569;NM_022101
1030	cg22975864	2.06395	0.0434281	chrX	RBM41;RBM41	NM_001171080;NM_018301
1035	cg23055678	2.36699	0.0465457	chrX	IL1RAPL2;IL1RAPL2	NM_017416;NM_017416
1037	cg23140620	-2.12611	0.0445639	chrX	PAK3;PAK3;PAK3;PAK3;PAK3;PAK3	NM_001128168;NM_001128173;NM_001128172;NM_001128166;NM_002578;NM_001128167
1044	cg23353205	0.64222	0.0443452	chrX	TRAPPC2;TRAPPC2;TRAPPC2;OFD1;OFD1	NM_001011658;NM_014563;NM_001128835;NM_003611;NM_003611
1061	cg23714856	2.17036	0.0357562	chrX	TBC1D8B;TBC1D8B	NM_017752;NM_198881
1071	cg23986186	3.36729	0.0370916	chrX	BCYRN1;TAF1;TAF1	NR_001568;NM_138923;NM_004606
1072	cg23987198	-0.367469	0.0491073	chrX
1083	cg24197116	-3.52354	0.0370916	chrX
1085	cg24248049	1.89848	0.0489914	chrX	FAM122C;FAM122C;FAM122C;FAM122C;FAM122C;FAM122C;FAM122C	NM_001170783;NM_138819;NM_001170784;NM_001170779;NM_001170782;NM_001170781;NM_001170780
1086	cg24258154	-0.852431	0.0357562	chrX
1087	cg24268663	-0.7817	0.0490509	chrX	GABRA3;MIR105-1	NM_000808;NR_029521
1088	cg24331682	-0.583693	0.0467856	chrX	KLHL15	NM_030624
1102	cg24690818	2.86554	0.0458542	chrX	AMOT	NM_133265
1109	cg24853313	-0.859844	0.0483638	chrX	MIR892A	NR_030584
1123	cg25279183	1.94247	0.0490989	chrX	ZDHHC9;ZDHHC9;ZDHHC9	NM_001008222;NM_016032;NM_016032
1126	cg25424856	1.67057	0.0434281	chrX	SHROOM4;SHROOM4;SHROOM4	NM_020717;NM_020717;NR_027121
1135	cg25594826	3.5723	0.0397916	chrX
1144	cg25820515	-0.622261	0.0461108	chrX	CLDN2;RIPPLY1	NM_001171092;NM_138382
1145	cg25832925	2.89593	0.042857	chrX
1148	cg25943872	1.81819	0.0370916	chrX	SLC16A2	NM_006517
1153	cg26035633	1.45958	0.0489914	chrX	IDH3G;IDH3G;SSR4	NM_004135;NM_174869;NM_006280
1157	cg26064831	0.917222	0.0485081	chrX	POLA1	NM_016937
1163	cg26140100	-1.74264	0.0370916	chrX	APLN	NM_017413
1164	cg26144445	1.13933	0.0408938	chrX	SLC35A2;SLC35A2;SLC35A2;SLC35A2	NM_001042498;NM_005660;NM_001032289;NM_001042498
1172	cg26283136	-0.580601	0.0461108	chrX
1196	cg26734249	2.14745	0.0487503	chrX	TMSL3;TMSB4X	NM_183049;NM_021109
1210	cg27118658	1.09501	0.0495708	chrX
1228	cg27553638	-0.791726	0.0410948	chrX	SPANXD;SPANXE;SPANXE	NM_032417;NM_145665;NM_145665
1230	cg27626023	1.93337	0.0446334	chrX
